# Supplementary material
Source: publisher site journal article supplement (https://www.spandidos-publications.com/6489/downloadSupplementary)
Supplement: Supplementary file 1 [file downloadSupplementary]

## Sheet: Proteins
Table SX.Protein identification
Accession	GeneName	Description	Coverage [%]	# Peptides	# PSMs	# Unique Peptides	# AAs	MW [kDa]	calc. pI	Score Mascot: Mascot	Abundances NC1	Abundances NC2	Abundances NC3	Abundances KD1	Abundances KD2	Abundances KD3
Q86YA3	ZGRF1	Protein ZGRF1 OS=Homo sapiens OX=9606 GN=ZGRF1 PE=1 SV=3	0	1	1	1	2104	236.5	6.16	27	94.5	68.9	91.7	138.9	102	104
O95881	TXNDC12	Thioredoxin domain-containing protein 12 OS=Homo sapiens OX=9606 GN=TXNDC12 PE=1 SV=1	40	6	12	6	172	19.2	5.4	350	91.4	93.4	92.6	105.6	107.7	109.2
O00330	PDHX	Pyruvate dehydrogenase protein X component, mitochondrial OS=Homo sapiens OX=9606 GN=PDHX PE=1 SV=3	32	13	17	13	501	54.1	8.66	365	96.9	98	94.7	102.7	104.2	103.5
Q96GX9	APIP	Methylthioribulose-1-phosphate dehydratase OS=Homo sapiens OX=9606 GN=APIP PE=1 SV=1	39	9	10	9	242	27.1	7.12	117	98.3	101.1	100	102.1	99.2	99.3
O76071	CIAO1	Probable cytosolic iron-sulfur protein assembly protein CIAO1 OS=Homo sapiens OX=9606 GN=CIAO1 PE=1 SV=1	35	8	12	8	339	37.8	4.97	379	97.7	95	98.5	104.9	101.9	102
Q53EP0	FNDC3B	Fibronectin type III domain-containing protein 3B OS=Homo sapiens OX=9606 GN=FNDC3B PE=1 SV=2	13	12	13	12	1204	132.8	5.95	317	95.8	105.7	98.6	102.3	99.4	98.2
Q13423	NNT	NAD(P) transhydrogenase, mitochondrial OS=Homo sapiens OX=9606 GN=NNT PE=1 SV=3	38	36	57	36	1086	113.8	8.09	1215	94.1	100.5	94.9	102.3	104.4	103.7
O15066	KIF3B	Kinesin-like protein KIF3B OS=Homo sapiens OX=9606 GN=KIF3B PE=1 SV=1	11	7	8	7	747	85.1	7.69	246	97.4	94	94	106.4	103.5	104.7
Q9BRX9	WDR83	WD repeat domain-containing protein 83 OS=Homo sapiens OX=9606 GN=WDR83 PE=1 SV=1	5	1	1	1	315	34.3	5.58	36	99.1	92.3	112.2	94.2	102	100.2
P62875	POLR2L	DNA-directed RNA polymerases I, II, and III subunit RPABC5 OS=Homo sapiens OX=9606 GN=POLR2L PE=1 SV=1	30	2	3	2	67	7.6	7.77	57	101.6	94.5	103.9	105.2	95.5	99.2
Q9UIJ7	AK3	GTP:AMP phosphotransferase AK3, mitochondrial OS=Homo sapiens OX=9606 GN=AK3 PE=1 SV=4	45	10	14	10	227	25.6	9.16	213	100.7	96.7	96.4	102.5	103.1	100.7
O60942	RNGTT	mRNA-capping enzyme OS=Homo sapiens OX=9606 GN=RNGTT PE=1 SV=1	4	2	5	2	597	68.5	8.13	129	100.9	90.5	101.5	114.8	95.8	96.5
Q6F5E8	CARMIL2	Capping protein, Arp2/3 and myosin-I linker protein 2 OS=Homo sapiens OX=9606 GN=CARMIL2 PE=1 SV=2	2	2	2	2	1435	154.6	6.76	0	95	87.6	90.1	113	102	112.3
Q00577	PURA	Transcriptional activator protein Pur-alpha OS=Homo sapiens OX=9606 GN=PURA PE=1 SV=2	37	8	10	8	322	34.9	6.44	288	99.9	101.9	98.5	99.9	102.9	96.9
Q9C0J8	WDR33	pre-mRNA 3' end processing protein WDR33 OS=Homo sapiens OX=9606 GN=WDR33 PE=1 SV=2	4	4	4	4	1336	145.8	9.17	81	101.8	100	101.2	95.1	99.5	102.3
Q9UGI8	TES	Testin OS=Homo sapiens OX=9606 GN=TES PE=1 SV=1	57	19	30	19	421	48	7.68	647	104.2	107.2	106.6	93.5	93.6	94.9
Q13185	CBX3	Chromobox protein homolog 3 OS=Homo sapiens OX=9606 GN=CBX3 PE=1 SV=4	63	11	34	9	183	20.8	5.33	898	110.8	108.7	110.5	90.3	90.5	89.2
Q96JT2	SLC45A3	Solute carrier family 45 member 3 OS=Homo sapiens OX=9606 GN=SLC45A3 PE=2 SV=1	2	1	1	1	553	59.3	7.46	0	101.1	91.2	97.7	104.2	98.4	107.3
Q15750	TAB1	TGF-beta-activated kinase 1 and MAP3K7-binding protein 1 OS=Homo sapiens OX=9606 GN=TAB1 PE=1 SV=1	19	6	6	6	504	54.6	5.52	166	98.6	99	98.8	100.5	101.5	101.5
P57105	SYNJ2BP	Synaptojanin-2-binding protein OS=Homo sapiens OX=9606 GN=SYNJ2BP PE=1 SV=2	44	4	4	4	145	15.9	6.3	100	100	98.2	98	104.4	99.2	100.1
P45974	USP5	Ubiquitin carboxyl-terminal hydrolase 5 OS=Homo sapiens OX=9606 GN=USP5 PE=1 SV=2	38	25	37	24	858	95.7	5.03	812	98.5	90.1	94.4	112.7	100.8	103.5
P04075	ALDOA	Fructose-bisphosphate aldolase A OS=Homo sapiens OX=9606 GN=ALDOA PE=1 SV=2	79	29	163	23	364	39.4	8.09	5688	94.4	101.9	94.6	101.5	105	102.6
O43617	TRAPPC3	Trafficking protein particle complex subunit 3 OS=Homo sapiens OX=9606 GN=TRAPPC3 PE=1 SV=1	34	7	8	7	180	20.3	4.96	161	101.3	99.7	103.9	101	98.3	95.7
Q9BSJ2	TUBGCP2	Gamma-tubulin complex component 2 OS=Homo sapiens OX=9606 GN=TUBGCP2 PE=1 SV=2	22	18	21	18	902	102.5	6.84	331	96.7	102.9	96.1	101.4	103.2	99.7
P0DPB6	POLR1D	DNA-directed RNA polymerases I and III subunit RPAC2 OS=Homo sapiens OX=9606 GN=POLR1D PE=1 SV=1	11	1	1	1	133	15.2	5.8	23
Q71RC2	LARP4	La-related protein 4 OS=Homo sapiens OX=9606 GN=LARP4 PE=1 SV=3	14	9	13	9	724	80.5	6.61	268	101.7	96.6	108.8	103.3	93.8	95.8
Q86SQ0	PHLDB2	Pleckstrin homology-like domain family B member 2 OS=Homo sapiens OX=9606 GN=PHLDB2 PE=1 SV=2	12	15	18	15	1253	142.1	7.43	270	93.2	93.7	100.7	106	101.1	105.2
P31751	AKT2	RAC-beta serine/threonine-protein kinase OS=Homo sapiens OX=9606 GN=AKT2 PE=1 SV=2	21	9	12	5	481	55.7	6.37	178	99.6	98.6	101.5	98	96.4	105.9
Q9UH17	APOBEC3B	DNA dC->dU-editing enzyme APOBEC-3B OS=Homo sapiens OX=9606 GN=APOBEC3B PE=1 SV=1	17	4	5	4	382	45.9	6.06	165	97.8	99.5	102.8	104.9	98.4	96.6
Q9ULK4	MED23	Mediator of RNA polymerase II transcription subunit 23 OS=Homo sapiens OX=9606 GN=MED23 PE=1 SV=2	12	12	13	12	1368	156.4	7.4	188	100.7	98.9	103.1	98.3	95.6	103.4
Q92538	GBF1	Golgi-specific brefeldin A-resistance guanine nucleotide exchange factor 1 OS=Homo sapiens OX=9606 GN=GBF1 PE=1 SV=2	19	26	37	26	1859	206.3	5.73	811	91	92.9	94	106.7	104	111.5
P04632	CAPNS1	Calpain small subunit 1 OS=Homo sapiens OX=9606 GN=CAPNS1 PE=1 SV=1	78	13	37	11	268	28.3	5.2	1561	100.7	105.8	97.9	98.7	96.6	100.2
Q96FV9	THOC1	THO complex subunit 1 OS=Homo sapiens OX=9606 GN=THOC1 PE=1 SV=1	26	14	16	14	657	75.6	4.98	336	103.2	108	103	95.1	95.3	95.4
P63104	YWHAZ	14-3-3 protein zeta/delta OS=Homo sapiens OX=9606 GN=YWHAZ PE=1 SV=1	75	19	116	13	245	27.7	4.79	2985	99.9	104.7	97.8	99.4	99.8	98.4
P58546	MTPN	Myotrophin OS=Homo sapiens OX=9606 GN=MTPN PE=1 SV=2	59	6	15	6	118	12.9	5.52	501	93.8	106.2	104.1	99.8	100.6	95.4
Q9HA77	CARS2	Probable cysteine--tRNA ligase, mitochondrial OS=Homo sapiens OX=9606 GN=CARS2 PE=1 SV=1	16	7	8	7	564	62.2	8.34	150	94.5	95	94	104.8	104.1	107.6
Q53T59	HS1BP3	HCLS1-binding protein 3 OS=Homo sapiens OX=9606 GN=HS1BP3 PE=1 SV=1	27	9	11	9	392	42.8	5.01	279	91.6	96.1	96.6	109.5	101.5	104.8
P83436	COG7	Conserved oligomeric Golgi complex subunit 7 OS=Homo sapiens OX=9606 GN=COG7 PE=1 SV=1	7	3	3	3	770	86.3	5.47	59	97.2	99.1	104.7	100.7	101.4	96.9
Q05639	EEF1A2	Elongation factor 1-alpha 2 OS=Homo sapiens OX=9606 GN=EEF1A2 PE=1 SV=1	34	13	198	1	463	50.4	9.03	7299	105.6	96.6	98.9	93.6	101.9	103.5
A0A0B4J2D5	GATD3B	Glutamine amidotransferase-like class 1 domain-containing protein 3B, mitochondrial OS=Homo sapiens OX=9606 GN=GATD3B PE=1 SV=1	13	3	4	3	268	28.1	8.27	141	92.9	97.1	93.2	108.6	101.2	107
Q12979	ABR	Active breakpoint cluster region-related protein OS=Homo sapiens OX=9606 GN=ABR PE=1 SV=2	24	18	20	16	859	97.5	6.55	396	99.3	98	97.4	102.8	99.3	103.1
Q9ULZ3	PYCARD	Apoptosis-associated speck-like protein containing a CARD OS=Homo sapiens OX=9606 GN=PYCARD PE=1 SV=2	42	7	10	7	195	21.6	6.34	280	102.3	111.9	100.6	94.8	93.1	97.3
Q9P0P8	MTRES1	Mitochondrial transcription rescue factor 1 OS=Homo sapiens OX=9606 GN=MTRES1 PE=1 SV=1	9	1	1	1	240	27.9	9.29	14
Q9H5N1	RABEP2	Rab GTPase-binding effector protein 2 OS=Homo sapiens OX=9606 GN=RABEP2 PE=1 SV=2	5	2	2	2	569	63.5	4.78	22	91.2	105	108.5	102.6	95	97.8
Q8N5A5	ZGPAT	Zinc finger CCCH-type with G patch domain-containing protein OS=Homo sapiens OX=9606 GN=ZGPAT PE=1 SV=3	10	5	7	5	531	57.3	5.43	107	98.7	96.9	104.5	99.9	98.8	101.2
Q14C86	GAPVD1	GTPase-activating protein and VPS9 domain-containing protein 1 OS=Homo sapiens OX=9606 GN=GAPVD1 PE=1 SV=2	19	23	32	23	1478	164.9	5.22	843	97.3	98.9	98.3	102.4	102.2	100.9
Q9Y6D5	ARFGEF2	Brefeldin A-inhibited guanine nucleotide-exchange protein 2 OS=Homo sapiens OX=9606 GN=ARFGEF2 PE=1 SV=3	17	27	33	18	1785	201.9	6.33	700	97.2	95.6	96.8	104.9	103.1	102.4
Q15434	RBMS2	RNA-binding motif, single-stranded-interacting protein 2 OS=Homo sapiens OX=9606 GN=RBMS2 PE=1 SV=1	15	5	8	3	407	43.9	9.07	189	84.9	85.4	90.9	120.3	112.6	105.8
Q5BKX8	CAVIN4	Caveolae-associated protein 4 OS=Homo sapiens OX=9606 GN=CAVIN4 PE=1 SV=2	2	1	1	1	364	41.9	8.28	0
Q9P0T7	TMEM9	Transmembrane protein 9 OS=Homo sapiens OX=9606 GN=TMEM9 PE=1 SV=1	10	1	1	1	183	20.6	6.65	24	97	93.5	98.8	102.6	101.8	106.3
P26641	EEF1G	Elongation factor 1-gamma OS=Homo sapiens OX=9606 GN=EEF1G PE=1 SV=3	69	27	88	27	437	50.1	6.67	2925	100.9	102.1	100.4	101.2	99.4	96.1
Q9UJX6	ANAPC2	Anaphase-promoting complex subunit 2 OS=Homo sapiens OX=9606 GN=ANAPC2 PE=1 SV=1	2	1	1	1	822	93.8	5.22	0	113.2	94.1	102.3	96.6	93.3	100.5
P51970	NDUFA8	NADH dehydrogenase [ubiquinone] 1 alpha subcomplex subunit 8 OS=Homo sapiens OX=9606 GN=NDUFA8 PE=1 SV=3	44	5	7	5	172	20.1	7.65	59	97	100	96.7	109.9	100.5	96
Q4G0F5	VPS26B	Vacuolar protein sorting-associated protein 26B OS=Homo sapiens OX=9606 GN=VPS26B PE=1 SV=2	17	6	6	5	336	39.1	7.36	57	92.2	93.1	98.5	108.5	102.8	104.9
O95772	STARD3NL	STARD3 N-terminal-like protein OS=Homo sapiens OX=9606 GN=STARD3NL PE=1 SV=1	5	1	1	1	234	26.6	4.81	23
Q9BQ67	GRWD1	Glutamate-rich WD repeat-containing protein 1 OS=Homo sapiens OX=9606 GN=GRWD1 PE=1 SV=1	33	9	12	9	446	49.4	4.92	408	110.7	105.4	108.8	89.4	93.6	92.1
P11586	MTHFD1	C-1-tetrahydrofolate synthase, cytoplasmic OS=Homo sapiens OX=9606 GN=MTHFD1 PE=1 SV=3	57	50	88	49	935	101.5	7.3	1887	100.3	102.4	98.8	97.8	101.4	99.3
Q08AM6	VAC14	Protein VAC14 homolog OS=Homo sapiens OX=9606 GN=VAC14 PE=1 SV=1	28	18	23	18	782	87.9	6.13	421	99.9	100.9	98.7	101	99.5	99.9
O14879	IFIT3	Interferon-induced protein with tetratricopeptide repeats 3 OS=Homo sapiens OX=9606 GN=IFIT3 PE=1 SV=1	10	4	6	4	490	56	5.2	174	94.8	96.4	94.4	105.5	105.4	103.5
Q13228	SELENBP1	Methanethiol oxidase OS=Homo sapiens OX=9606 GN=SELENBP1 PE=1 SV=2	16	5	6	5	472	52.4	6.37	63	101.8	108.8	97.3	97.8	94	100.4
P31944	CASP14	Caspase-14 OS=Homo sapiens OX=9606 GN=CASP14 PE=1 SV=2	7	1	1	1	242	27.7	5.58	0	92.5	72.4	80.2	151.5	105.9	97.5
Q9UNN8	PROCR	Endothelial protein C receptor OS=Homo sapiens OX=9606 GN=PROCR PE=1 SV=1	16	3	4	3	238	26.7	7.18	107	99.1	91.1	97.4	115.1	97.6	99.7
Q9BW66	CINP	Cyclin-dependent kinase 2-interacting protein OS=Homo sapiens OX=9606 GN=CINP PE=1 SV=1	22	3	3	3	212	24.3	6.28	58	100.2	99.9	99.7	98.1	101.2	101
Q8WUA8	TSKU	Tsukushin OS=Homo sapiens OX=9606 GN=TSKU PE=2 SV=3	4	1	1	1	353	37.8	6.87	60	103.1	107.9	105.8	95	84.8	103.4
Q9H3S5	PIGM	GPI mannosyltransferase 1 OS=Homo sapiens OX=9606 GN=PIGM PE=1 SV=1	3	1	1	1	423	49.4	9.11	35	102.9	99	97.2	100.1	100.6	100.2
P30154	PPP2R1B	Serine/threonine-protein phosphatase 2A 65 kDa regulatory subunit A beta isoform OS=Homo sapiens OX=9606 GN=PPP2R1B PE=1 SV=3	38	17	22	10	601	66.2	4.94	580	108.6	92.7	107.5	99.2	94.1	97.9
Q92805	GOLGA1	Golgin subfamily A member 1 OS=Homo sapiens OX=9606 GN=GOLGA1 PE=1 SV=3	4	2	2	2	767	88.1	5.27	38	92.2	81.5	87	119.3	107.9	112.2
Q9BYG5	PARD6B	Partitioning defective 6 homolog beta OS=Homo sapiens OX=9606 GN=PARD6B PE=1 SV=1	42	11	12	11	372	41.2	5.58	284	101.4	99.1	96.5	104.5	100.6	97.8
Q99729	HNRNPAB	Heterogeneous nuclear ribonucleoprotein A/B OS=Homo sapiens OX=9606 GN=HNRNPAB PE=1 SV=2	35	13	28	12	332	36.2	8.21	567	105.9	103.9	106.3	93.1	95.4	95.4
P27540	ARNT	Aryl hydrocarbon receptor nuclear translocator OS=Homo sapiens OX=9606 GN=ARNT PE=1 SV=1	2	1	1	1	789	86.6	6.54	28	105.8	101.8	102.6	91.7	88.5	109.6
Q5T280	SPOUT1	Putative methyltransferase C9orf114 OS=Homo sapiens OX=9606 GN=SPOUT1 PE=1 SV=3	3	1	1	1	376	42	7.43	24	106.4	94.8	102.5	97.2	99.6	99.6
Q96BX8	MOB3A	MOB kinase activator 3A OS=Homo sapiens OX=9606 GN=MOB3A PE=1 SV=1	6	2	2	1	217	25.4	8.63	19
P53597	SUCLG1	Succinate--CoA ligase [ADP/GDP-forming] subunit alpha, mitochondrial OS=Homo sapiens OX=9606 GN=SUCLG1 PE=1 SV=4	21	6	13	6	346	36.2	8.79	285	101.1	101.4	99.9	100.9	100	96.7
O75381	PEX14	Peroxisomal membrane protein PEX14 OS=Homo sapiens OX=9606 GN=PEX14 PE=1 SV=1	15	5	9	5	377	41.2	4.94	270	95.6	99.1	95.9	104.1	103.4	101.8
O60234	GMFG	Glia maturation factor gamma OS=Homo sapiens OX=9606 GN=GMFG PE=1 SV=1	51	6	14	5	142	16.8	5.26	359	94.7	101.2	92.9	107.1	102.4	101.8
O15264	MAPK13	Mitogen-activated protein kinase 13 OS=Homo sapiens OX=9606 GN=MAPK13 PE=1 SV=1	17	6	8	5	365	42.1	8.38	103	99.8	95.6	95.6	96.4	99.7	112.9
P46977	STT3A	Dolichyl-diphosphooligosaccharide--protein glycosyltransferase subunit STT3A OS=Homo sapiens OX=9606 GN=STT3A PE=1 SV=2	28	20	25	18	705	80.5	8.07	355	94.8	94.8	96.6	106.3	105.5	101.9
P10644	PRKAR1A	cAMP-dependent protein kinase type I-alpha regulatory subunit OS=Homo sapiens OX=9606 GN=PRKAR1A PE=1 SV=1	46	17	20	17	381	43	5.35	320	95.4	98.8	100.5	103	102.2	100.1
Q9Y4G6	TLN2	Talin-2 OS=Homo sapiens OX=9606 GN=TLN2 PE=1 SV=4	12	31	43	14	2542	271.4	5.57	820	95.4	92.4	91.9	109.6	105.5	105.2
O15498	YKT6	Synaptobrevin homolog YKT6 OS=Homo sapiens OX=9606 GN=YKT6 PE=1 SV=1	45	9	16	9	198	22.4	6.92	400	95.8	100.2	102.3	98.5	101.9	101.4
Q6ZSS3	ZNF621	Zinc finger protein 621 OS=Homo sapiens OX=9606 GN=ZNF621 PE=2 SV=1	2	1	1	1	439	49.2	8.94	0	101.9	99.3	101.2	97.9	103	96.7
Q8WVK2	SNRNP27	U4/U6.U5 small nuclear ribonucleoprotein 27 kDa protein OS=Homo sapiens OX=9606 GN=SNRNP27 PE=1 SV=1	23	3	4	3	155	18.8	11.62	132	96.3	102.4	103.3	100.3	102.3	95.3
Q9BRT3	MIEN1	Migration and invasion enhancer 1 OS=Homo sapiens OX=9606 GN=MIEN1 PE=1 SV=1	23	3	3	3	115	12.4	4.37	68	92.2	96.5	98.4	102	99.8	111.1
Q9H173	SIL1	Nucleotide exchange factor SIL1 OS=Homo sapiens OX=9606 GN=SIL1 PE=1 SV=1	11	5	6	5	461	52.1	5.36	200	100.9	93.2	95	97.5	106.1	107.2
Q08623	PUDP	Pseudouridine-5'-phosphatase OS=Homo sapiens OX=9606 GN=PUDP PE=1 SV=3	30	6	8	6	228	25.2	5.31	211	102	106.8	96.9	98.3	98.1	97.9
Q9UBS4	DNAJB11	DnaJ homolog subfamily B member 11 OS=Homo sapiens OX=9606 GN=DNAJB11 PE=1 SV=1	38	14	19	14	358	40.5	6.18	451	96.8	94.8	96.5	106	105.3	100.7
Q6PIJ6	FBXO38	F-box only protein 38 OS=Homo sapiens OX=9606 GN=FBXO38 PE=1 SV=3	2	1	1	1	1188	133.9	6.33	32	103	96.7	96	107.2	95.7	101.3
P61026	RAB10	Ras-related protein Rab-10 OS=Homo sapiens OX=9606 GN=RAB10 PE=1 SV=1	65	13	32	10	200	22.5	8.38	729	82.2	85.8	85.7	122	84.8	139.5
Q8TED0	UTP15	U3 small nucleolar RNA-associated protein 15 homolog OS=Homo sapiens OX=9606 GN=UTP15 PE=1 SV=3	31	15	18	15	518	58.4	9.11	231	105.4	103.4	106.4	93.7	93.9	97.2
Q14C87	TMEM132D	Transmembrane protein 132D OS=Homo sapiens OX=9606 GN=TMEM132D PE=1 SV=1	2	1	1	1	1099	122.2	5.73	0
P52954	LBX1	Transcription factor LBX1 OS=Homo sapiens OX=9606 GN=LBX1 PE=2 SV=2	3	1	1	1	281	30.2	6.93	0	109	107.3	95	97.5	69.6	121.7
Q7L5N7	LPCAT2	Lysophosphatidylcholine acyltransferase 2 OS=Homo sapiens OX=9606 GN=LPCAT2 PE=1 SV=1	21	10	11	10	544	60.2	6.55	97	101.6	103.3	97.5	99.1	98.8	99.7
Q5SZL2	CEP85L	Centrosomal protein of 85 kDa-like OS=Homo sapiens OX=9606 GN=CEP85L PE=1 SV=1	1	1	2	1	805	91.8	6.33	0	86.4	86.4	84.2	115.7	110.5	116.9
P61758	VBP1	Prefoldin subunit 3 OS=Homo sapiens OX=9606 GN=VBP1 PE=1 SV=4	66	15	26	14	197	22.6	7.11	389	96.9	100.9	98.7	100.9	101.8	100.8
P62633	CNBP	Cellular nucleic acid-binding protein OS=Homo sapiens OX=9606 GN=CNBP PE=1 SV=1	55	9	14	9	177	19.5	7.71	205	100.9	92.4	109.4	106.5	97.5	93.3
P22736	NR4A1	Nuclear receptor subfamily 4 group A member 1 OS=Homo sapiens OX=9606 GN=NR4A1 PE=1 SV=1	4	2	2	2	598	64.4	7.17	58	108.7	94.7	110.1	95	85.6	105.7
Q07889	SOS1	Son of sevenless homolog 1 OS=Homo sapiens OX=9606 GN=SOS1 PE=1 SV=1	3	3	3	3	1333	152.4	6.84	46	103.9	103.6	103.7	100.2	96.6	92
O43815	STRN	Striatin OS=Homo sapiens OX=9606 GN=STRN PE=1 SV=4	23	14	18	13	780	86.1	5.27	361	95.1	98.9	94.9	102.2	102.6	106.4
Q9BVS4	RIOK2	Serine/threonine-protein kinase RIO2 OS=Homo sapiens OX=9606 GN=RIOK2 PE=1 SV=2	6	2	2	2	552	63.2	5.94	77	99.9	94.7	116.5	101.8	87.6	99.5
Q15047	SETDB1	Histone-lysine N-methyltransferase SETDB1 OS=Homo sapiens OX=9606 GN=SETDB1 PE=1 SV=1	2	3	4	3	1291	143.1	6.02	83	100.4	94.9	97.6	107	94.9	105.3
Q9UHL4	DPP7	Dipeptidyl peptidase 2 OS=Homo sapiens OX=9606 GN=DPP7 PE=1 SV=3	7	3	4	3	492	54.3	6.32	38	97.8	96.9	97.4	98.9	100.2	108.9
Q9Y496	KIF3A	Kinesin-like protein KIF3A OS=Homo sapiens OX=9606 GN=KIF3A PE=1 SV=4	9	5	6	5	699	80	6.54	131	94.9	91.4	94.4	106.9	103.8	108.6
P15407	FOSL1	Fos-related antigen 1 OS=Homo sapiens OX=9606 GN=FOSL1 PE=1 SV=1	19	4	5	4	271	29.4	8.02	76	123.3	101.6	119.8	84.2	88.7	82.3
Q9H1E3	NUCKS1	Nuclear ubiquitous casein and cyclin-dependent kinase substrate 1 OS=Homo sapiens OX=9606 GN=NUCKS1 PE=1 SV=1	24	5	9	5	243	27.3	5.08	152	113.2	108.3	98.7	90.8	95.9	93.2
O60645	EXOC3	Exocyst complex component 3 OS=Homo sapiens OX=9606 GN=EXOC3 PE=1 SV=3	18	10	11	10	745	85.5	6.29	130	100	97.7	96.1	102.6	102.3	101.3
Q86U28	ISCA2	Iron-sulfur cluster assembly 2 homolog, mitochondrial OS=Homo sapiens OX=9606 GN=ISCA2 PE=1 SV=2	29	4	5	4	154	16.5	5.25	82	96.5	95.9	99.5	103.5	100.6	104
O95807	TMEM50A	Transmembrane protein 50A OS=Homo sapiens OX=9606 GN=TMEM50A PE=1 SV=1	5	1	2	1	157	17.4	5.87	24
Q9P1F3	ABRACL	Costars family protein ABRACL OS=Homo sapiens OX=9606 GN=ABRACL PE=1 SV=1	69	4	6	4	81	9.1	6.29	245	100.2	103	102.2	98.4	97.4	98.9
Q9NR28	DIABLO	Diablo homolog, mitochondrial OS=Homo sapiens OX=9606 GN=DIABLO PE=1 SV=1	35	6	11	6	239	27.1	5.9	325	98.1	96.8	96.7	103.7	100.9	103.8
Q6XZF7	DNMBP	Dynamin-binding protein OS=Homo sapiens OX=9606 GN=DNMBP PE=1 SV=1	24	28	36	28	1577	177.2	5.39	825	97.1	95	98.1	105.2	100.8	103.8
Q12996	CSTF3	Cleavage stimulation factor subunit 3 OS=Homo sapiens OX=9606 GN=CSTF3 PE=1 SV=1	35	19	24	19	717	82.9	8.12	567	97.6	98	100.6	100.5	100	103.3
Q8TBM7	TMEM254	Transmembrane protein 254 OS=Homo sapiens OX=9606 GN=TMEM254 PE=1 SV=1	9	1	1	1	123	14.2	9.67	23	101.3	94.5	95.5	101.8	101.2	105.6
Q9BVC4	MLST8	Target of rapamycin complex subunit LST8 OS=Homo sapiens OX=9606 GN=MLST8 PE=1 SV=1	14	3	3	3	326	35.9	5.86	70	93.3	88	95.2	108.7	106.8	108.1
P04798	CYP1A1	Cytochrome P450 1A1 OS=Homo sapiens OX=9606 GN=CYP1A1 PE=1 SV=1	5	2	2	2	512	58.1	8.35	33	117.3	91.4	92.3	106.4	96.1	96.5
Q719H9	KCTD1	BTB/POZ domain-containing protein KCTD1 OS=Homo sapiens OX=9606 GN=KCTD1 PE=1 SV=1	5	1	1	1	257	29.4	7.08	0
Q9NYB9	ABI2	Abl interactor 2 OS=Homo sapiens OX=9606 GN=ABI2 PE=1 SV=1	11	4	5	3	513	55.6	6.16	145	102.5	103.3	98.7	98.3	99.9	97.3
Q9Y6I4	USP3	Ubiquitin carboxyl-terminal hydrolase 3 OS=Homo sapiens OX=9606 GN=USP3 PE=1 SV=2	5	2	2	2	520	58.9	8.18	52	100.7	94.7	107.2	101.1	94.9	101.4
Q99590	SCAF11	Protein SCAF11 OS=Homo sapiens OX=9606 GN=SCAF11 PE=1 SV=2	9	10	10	10	1463	164.6	8.41	136	100	99.1	103.9	95.6	94.5	107
Q9H9Q4	NHEJ1	Non-homologous end-joining factor 1 OS=Homo sapiens OX=9606 GN=NHEJ1 PE=1 SV=1	3	1	1	1	299	33.3	5.97	39	89	91.2	95.4	103.9	109.8	110.7
Q9BUH6	PAXX	Protein PAXX OS=Homo sapiens OX=9606 GN=PAXX PE=1 SV=2	34	6	8	6	204	21.6	5.48	248	105.4	103.7	101.3	93.6	96	100.1
O15530	PDPK1	3-phosphoinositide-dependent protein kinase 1 OS=Homo sapiens OX=9606 GN=PDPK1 PE=1 SV=1	10	4	4	4	556	63.1	7.36	72	88.8	98.6	103.3	98.6	105.1	105.6
O95749	GGPS1	Geranylgeranyl pyrophosphate synthase OS=Homo sapiens OX=9606 GN=GGPS1 PE=1 SV=1	7	2	2	2	300	34.8	6.14	32	96.3	93.1	94.6	107.6	106	102.5
Q9NZC9	SMARCAL1	SWI/SNF-related matrix-associated actin-dependent regulator of chromatin subfamily A-like protein 1 OS=Homo sapiens OX=9606 GN=SMARCAL1 PE=1 SV=1	2	1	1	1	954	105.9	9.06	18
Q8ND24	RNF214	RING finger protein 214 OS=Homo sapiens OX=9606 GN=RNF214 PE=1 SV=2	23	13	14	13	703	77.6	6.95	474	94.6	92.1	94.1	104.2	97.7	117.3
Q9UPR0	PLCL2	Inactive phospholipase C-like protein 2 OS=Homo sapiens OX=9606 GN=PLCL2 PE=1 SV=2	1	1	2	1	1127	125.8	6.9	0	109.4	91.7	98.3	112.3	99.8	88.5
P48739	PITPNB	Phosphatidylinositol transfer protein beta isoform OS=Homo sapiens OX=9606 GN=PITPNB PE=1 SV=2	65	17	26	13	271	31.5	6.87	580	103.8	104.2	107.6	95.4	94.3	94.7
Q00341	HDLBP	Vigilin OS=Homo sapiens OX=9606 GN=HDLBP PE=1 SV=2	41	43	60	43	1268	141.4	6.87	1111	100.8	98.1	103.5	100.8	97.8	98.9
P40306	PSMB10	Proteasome subunit beta type-10 OS=Homo sapiens OX=9606 GN=PSMB10 PE=1 SV=1	14	3	4	3	273	28.9	7.81	131	93.3	92.2	88.8	107	109.6	109.2
P08263	GSTA1	Glutathione S-transferase A1 OS=Homo sapiens OX=9606 GN=GSTA1 PE=1 SV=3	6	1	1	1	222	25.6	8.88	31
Q96D71	REPS1	RalBP1-associated Eps domain-containing protein 1 OS=Homo sapiens OX=9606 GN=REPS1 PE=1 SV=3	10	7	9	7	796	86.6	5.69	208	102.5	101.7	99.4	98	100.2	98.2
Q9ULM6	CNOT6	CCR4-NOT transcription complex subunit 6 OS=Homo sapiens OX=9606 GN=CNOT6 PE=1 SV=2	2	1	1	1	557	63.3	7.27	16	97.1	92.8	103.1	106.6	94.4	106
Q9H1C4	UNC93B1	Protein unc-93 homolog B1 OS=Homo sapiens OX=9606 GN=UNC93B1 PE=1 SV=2	3	1	1	1	597	66.6	6.96	17	104.1	106.6	112.3	103.6	86.2	87.2
O94967	WDR47	WD repeat-containing protein 47 OS=Homo sapiens OX=9606 GN=WDR47 PE=1 SV=1	3	3	3	3	919	101.9	5.94	35	93.1	89.9	94.9	104.4	113.6	104
Q16342	PDCD2	Programmed cell death protein 2 OS=Homo sapiens OX=9606 GN=PDCD2 PE=1 SV=2	8	1	2	1	344	38.6	5.38	0
Q16836	HADH	Hydroxyacyl-coenzyme A dehydrogenase, mitochondrial OS=Homo sapiens OX=9606 GN=HADH PE=1 SV=3	35	13	14	13	314	34.3	8.85	98	101	103.9	96.6	100.6	99.8	98.1
Q5T0F9	CC2D1B	Coiled-coil and C2 domain-containing protein 1B OS=Homo sapiens OX=9606 GN=CC2D1B PE=1 SV=1	23	18	22	17	858	94.2	5.26	313	95.9	95.9	98.2	100.5	102.6	106.9
Q96F24	NRBF2	Nuclear receptor-binding factor 2 OS=Homo sapiens OX=9606 GN=NRBF2 PE=1 SV=1	10	3	3	3	287	32.4	5.87	29	100.6	95.4	99.4	97.8	103.7	103.1
Q7Z2W9	MRPL21	39S ribosomal protein L21, mitochondrial OS=Homo sapiens OX=9606 GN=MRPL21 PE=1 SV=2	15	2	3	2	205	22.8	9.89	114	96.6	93.9	98.8	103.1	99.9	107.6
Q5HYK3	COQ5	2-methoxy-6-polyprenyl-1,4-benzoquinol methylase, mitochondrial OS=Homo sapiens OX=9606 GN=COQ5 PE=1 SV=2	3	1	1	1	327	37.1	6.95	32	102.1	101.9	101.3	100.5	96	98.2
P69905	HBA1	Hemoglobin subunit alpha OS=Homo sapiens OX=9606 GN=HBA1 PE=1 SV=2	43	5	8	5	142	15.2	8.68	79	104.4	94.6	94.3	99.2	104.7	102.8
Q12778	FOXO1	Forkhead box protein O1 OS=Homo sapiens OX=9606 GN=FOXO1 PE=1 SV=2	3	2	2	2	655	69.6	6.77	37	110.9	102.7	104.3	100.6	88.9	92.5
Q96EQ0	SGTB	Small glutamine-rich tetratricopeptide repeat-containing protein beta OS=Homo sapiens OX=9606 GN=SGTB PE=1 SV=1	16	4	4	4	304	33.4	4.92	112	98.8	97.6	97.4	102.4	105.5	98.2
Q92733	PRCC	Proline-rich protein PRCC OS=Homo sapiens OX=9606 GN=PRCC PE=1 SV=1	7	3	4	3	491	52.4	5.1	113	99.6	99.4	100.2	96.6	102.8	101.4
P13473	LAMP2	Lysosome-associated membrane glycoprotein 2 OS=Homo sapiens OX=9606 GN=LAMP2 PE=1 SV=2	5	2	3	2	410	44.9	5.63	101	92.2	91.9	98.5	110.1	100.4	106.8
P39023	RPL3	60S ribosomal protein L3 OS=Homo sapiens OX=9606 GN=RPL3 PE=1 SV=2	59	27	85	27	403	46.1	10.18	1621	102.7	102.5	101.4	95.2	100.1	98.2
Q96NW7	LRRC7	Leucine-rich repeat-containing protein 7 OS=Homo sapiens OX=9606 GN=LRRC7 PE=1 SV=1	2	3	4	1	1537	172.5	6.81	91	95.5	88.1	91.3	122.1	101.5	101.5
Q9H4E7	DEF6	Differentially expressed in FDCP 6 homolog OS=Homo sapiens OX=9606 GN=DEF6 PE=1 SV=1	9	4	4	4	631	73.9	6.05	110	95.8	93.5	96.5	107.2	101.8	105.1
P52943	CRIP2	Cysteine-rich protein 2 OS=Homo sapiens OX=9606 GN=CRIP2 PE=1 SV=1	36	4	4	4	208	22.5	8.72	151	85	93.5	86.9	114.1	110.8	109.8
Q15642	TRIP10	Cdc42-interacting protein 4 OS=Homo sapiens OX=9606 GN=TRIP10 PE=1 SV=3	50	25	37	25	601	68.3	5.73	726	98.1	97.3	95.2	103.1	104.8	101.4
P29692	EEF1D	Elongation factor 1-delta OS=Homo sapiens OX=9606 GN=EEF1D PE=1 SV=5	72	19	56	15	281	31.1	5.01	1240	95.9	98	98.3	102.2	104.1	101.4
Q6ZMG9	CERS6	Ceramide synthase 6 OS=Homo sapiens OX=9606 GN=CERS6 PE=1 SV=1	6	3	3	3	384	44.9	7.65	24	101.4	102.5	103.6	98.8	95.8	97.9
A0PJW6	TMEM223	Transmembrane protein 223 OS=Homo sapiens OX=9606 GN=TMEM223 PE=1 SV=1	10	2	3	2	202	22	11.02	24	99.4	100.3	98.1	103.5	98.9	99.9
Q96S66	CLCC1	Chloride channel CLIC-like protein 1 OS=Homo sapiens OX=9606 GN=CLCC1 PE=1 SV=1	3	2	2	2	551	62	5.55	32	93.6	98.9	104.2	98.9	104.1	100.2
P05106	ITGB3	Integrin beta-3 OS=Homo sapiens OX=9606 GN=ITGB3 PE=1 SV=2	2	1	1	1	788	87	5.24	0
P51532	SMARCA4	Transcription activator BRG1 OS=Homo sapiens OX=9606 GN=SMARCA4 PE=1 SV=2	16	21	29	13	1647	184.5	7.88	664	103.7	104	106.1	93.6	96.7	96
Q9ULM3	YEATS2	YEATS domain-containing protein 2 OS=Homo sapiens OX=9606 GN=YEATS2 PE=1 SV=2	1	2	2	1	1422	150.7	8.98	0	100.4	103.9	102	97.6	93.5	102.5
Q92621	NUP205	Nuclear pore complex protein Nup205 OS=Homo sapiens OX=9606 GN=NUP205 PE=1 SV=3	27	41	56	41	2012	227.8	6.19	1294	101.7	102.8	100.8	97.1	98	99.5
Q2TAA2	IAH1	Isoamyl acetate-hydrolyzing esterase 1 homolog OS=Homo sapiens OX=9606 GN=IAH1 PE=1 SV=1	28	5	7	5	248	27.6	5.3	225	99.7	99.8	95.2	96.9	101.3	107
P53365	ARFIP2	Arfaptin-2 OS=Homo sapiens OX=9606 GN=ARFIP2 PE=1 SV=1	13	4	6	3	341	37.8	6.04	117	103.5	101.6	105.8	99.5	96.4	93.3
P28838	LAP3	Cytosol aminopeptidase OS=Homo sapiens OX=9606 GN=LAP3 PE=1 SV=3	57	22	38	22	519	56.1	7.93	1026	104.1	105	104.6	94.8	94.7	96.6
Q06124	PTPN11	Tyrosine-protein phosphatase non-receptor type 11 OS=Homo sapiens OX=9606 GN=PTPN11 PE=1 SV=3	49	26	35	26	593	68	7.3	619	101.2	102.4	101.7	96.3	99.4	99.1
P38606	ATP6V1A	V-type proton ATPase catalytic subunit A OS=Homo sapiens OX=9606 GN=ATP6V1A PE=1 SV=2	49	23	36	23	617	68.3	5.52	783	96.3	101.3	97.1	101.6	102	101.7
Q9NY12	GAR1	H/ACA ribonucleoprotein complex subunit 1 OS=Homo sapiens OX=9606 GN=GAR1 PE=1 SV=1	29	6	9	6	217	22.3	10.92	141	103.4	104.6	104	97.2	98.8	91.9
Q9UI42	CPA4	Carboxypeptidase A4 OS=Homo sapiens OX=9606 GN=CPA4 PE=1 SV=2	20	7	8	7	421	47.3	6.7	164	89.2	82.5	84.3	116.7	114.2	113.2
Q12929	EPS8	Epidermal growth factor receptor kinase substrate 8 OS=Homo sapiens OX=9606 GN=EPS8 PE=1 SV=1	10	6	7	6	822	91.8	7.5	198	95.9	98.3	100.2	102.9	100.4	102.4
Q8IV38	ANKMY2	Ankyrin repeat and MYND domain-containing protein 2 OS=Homo sapiens OX=9606 GN=ANKMY2 PE=1 SV=1	13	4	4	4	441	49.3	6.25	133	98.7	100.1	101.2	99.5	98.5	101.9
Q14914	PTGR1	Prostaglandin reductase 1 OS=Homo sapiens OX=9606 GN=PTGR1 PE=1 SV=2	37	10	12	10	329	35.8	8.29	204	91.5	93.1	97.7	106.7	107.1	103.9
O60733	PLA2G6	85/88 kDa calcium-independent phospholipase A2 OS=Homo sapiens OX=9606 GN=PLA2G6 PE=1 SV=2	1	1	1	1	806	89.8	7.27	20	105.1	97.4	111.1	99.4	85.8	101.1
Q96IW7	SEC22A	Vesicle-trafficking protein SEC22a OS=Homo sapiens OX=9606 GN=SEC22A PE=1 SV=1	4	1	1	1	307	34.9	8.24	28	94.3	92.2	94.3	111.1	107.2	101
Q16718	NDUFA5	NADH dehydrogenase [ubiquinone] 1 alpha subcomplex subunit 5 OS=Homo sapiens OX=9606 GN=NDUFA5 PE=1 SV=3	66	6	12	6	116	13.5	5.99	359	97.3	98.1	98.4	104.1	99.4	102.7
P35658	NUP214	Nuclear pore complex protein Nup214 OS=Homo sapiens OX=9606 GN=NUP214 PE=1 SV=2	21	30	37	30	2090	213.5	7.47	1020	101	100.1	97.6	100.3	100.7	100.3
P18583	SON	Protein SON OS=Homo sapiens OX=9606 GN=SON PE=1 SV=4	13	24	31	23	2426	263.7	5.64	599	109.4	105	110.6	91.8	90.3	92.9
O14647	CHD2	Chromodomain-helicase-DNA-binding protein 2 OS=Homo sapiens OX=9606 GN=CHD2 PE=1 SV=2	8	13	14	8	1828	211.2	8.1	155	94.9	94.8	97.8	104.6	102.3	105.7
P35251	RFC1	Replication factor C subunit 1 OS=Homo sapiens OX=9606 GN=RFC1 PE=1 SV=4	9	8	9	8	1148	128.2	9.36	203	103.3	101	103	99.6	96	97.1
Q9HAU0	PLEKHA5	Pleckstrin homology domain-containing family A member 5 OS=Homo sapiens OX=9606 GN=PLEKHA5 PE=1 SV=1	17	16	19	16	1116	127.4	7.53	294	99.3	96.2	97.8	103.7	100.4	102.6
P19823	ITIH2	Inter-alpha-trypsin inhibitor heavy chain H2 OS=Homo sapiens OX=9606 GN=ITIH2 PE=1 SV=2	4	4	4	4	946	106.4	6.86	104	94.1	100.8	87.9	93.4	124.5	99.3
P80188	LCN2	Neutrophil gelatinase-associated lipocalin OS=Homo sapiens OX=9606 GN=LCN2 PE=1 SV=2	18	2	2	2	198	22.6	8.91	22	94.7	107.9	101.6	97.3	90.7	107.9
P18754	RCC1	Regulator of chromosome condensation OS=Homo sapiens OX=9606 GN=RCC1 PE=1 SV=1	43	11	16	11	421	44.9	7.52	613	94.9	101.2	101.5	99.6	101.5	101.4
Q9NZV5	SELENON	Selenoprotein N OS=Homo sapiens OX=9606 GN=SELENON PE=1 SV=5	3	2	2	2	590	65.8	5.48	0	91.3	101.4	95.5	106.7	104.2	100.9
P49441	INPP1	Inositol polyphosphate 1-phosphatase OS=Homo sapiens OX=9606 GN=INPP1 PE=1 SV=1	19	5	8	5	399	44	5.26	233	95.8	94.1	94.1	106.1	106.4	103.6
Q96KB5	PBK	Lymphokine-activated killer T-cell-originated protein kinase OS=Homo sapiens OX=9606 GN=PBK PE=1 SV=3	54	13	19	13	322	36.1	5.12	262	100.9	98.8	105	98	98	99.3
O43166	SIPA1L1	Signal-induced proliferation-associated 1-like protein 1 OS=Homo sapiens OX=9606 GN=SIPA1L1 PE=1 SV=4	1	2	2	2	1804	199.9	8.19	26	100.6	91.7	89.9	95.7	105.3	116.8
P24539	ATP5PB	ATP synthase F(0) complex subunit B1, mitochondrial OS=Homo sapiens OX=9606 GN=ATP5PB PE=1 SV=2	35	10	18	10	256	28.9	9.36	310	95.4	94	95.7	104.2	103.8	107
P43304	GPD2	Glycerol-3-phosphate dehydrogenase, mitochondrial OS=Homo sapiens OX=9606 GN=GPD2 PE=1 SV=3	51	31	47	31	727	80.8	7.69	1221	100.5	102.3	99.5	97.6	99.5	100.6
O95926	SYF2	Pre-mRNA-splicing factor SYF2 OS=Homo sapiens OX=9606 GN=SYF2 PE=1 SV=1	8	2	2	2	243	28.7	8.4	30	98.8	93.3	102.8	100.5	102.3	102.3
Q8WW12	PCNP	PEST proteolytic signal-containing nuclear protein OS=Homo sapiens OX=9606 GN=PCNP PE=1 SV=2	45	7	14	7	178	18.9	7.49	228	102	104.1	101.9	98	98.1	95.9
Q15631	TSN	Translin OS=Homo sapiens OX=9606 GN=TSN PE=1 SV=1	32	7	13	7	228	26.2	6.44	234	100.6	107.8	99	96.9	97.2	98.6
Q15058	KIF14	Kinesin-like protein KIF14 OS=Homo sapiens OX=9606 GN=KIF14 PE=1 SV=1	11	15	15	15	1648	186.4	7.91	202	97.2	100	103	98.4	99.6	101.8
Q9NVX0	HAUS2	HAUS augmin-like complex subunit 2 OS=Homo sapiens OX=9606 GN=HAUS2 PE=1 SV=1	12	2	2	2	235	26.9	7.88	48	92.6	93.3	99.4	91.4	98.8	124.6
Q99963	SH3GL3	Endophilin-A3 OS=Homo sapiens OX=9606 GN=SH3GL3 PE=1 SV=1	4	2	4	1	347	39.3	5.38	0
P23497	SP100	Nuclear autoantigen Sp-100 OS=Homo sapiens OX=9606 GN=SP100 PE=1 SV=3	16	13	19	11	879	100.4	8.22	247	103.8	95.9	98.5	101.8	98.2	101.7
Q86YV5	PRAG1	Inactive tyrosine-protein kinase PRAG1 OS=Homo sapiens OX=9606 GN=PRAG1 PE=1 SV=4	1	1	1	1	1406	149.5	7.2	23	101.2	103.3	93.8	95.3	99.6	106.7
Q12769	NUP160	Nuclear pore complex protein Nup160 OS=Homo sapiens OX=9606 GN=NUP160 PE=1 SV=3	27	28	38	28	1436	162	5.5	686	105.8	104.5	104.3	94.9	95.8	94.6
P27695	APEX1	DNA-(apurinic or apyrimidinic site) lyase OS=Homo sapiens OX=9606 GN=APEX1 PE=1 SV=2	59	17	34	17	318	35.5	8.12	685	108.3	106.6	104.7	92.4	95	93
Q7L5Y9	MAEA	E3 ubiquitin-protein transferase MAEA OS=Homo sapiens OX=9606 GN=MAEA PE=1 SV=1	7	2	2	2	396	45.3	8.69	63	96.1	91.4	103.4	104.9	99.4	104.7
Q71SY5	MED25	Mediator of RNA polymerase II transcription subunit 25 OS=Homo sapiens OX=9606 GN=MED25 PE=1 SV=2	2	1	1	1	747	78.1	8.34	0
Q8N283	ANKRD35	Ankyrin repeat domain-containing protein 35 OS=Homo sapiens OX=9606 GN=ANKRD35 PE=2 SV=2	1	1	1	1	1001	109.9	6.02	17	103.2	103.5	107.6	94.9	97.2	93.6
Q9BRP4	PAAF1	Proteasomal ATPase-associated factor 1 OS=Homo sapiens OX=9606 GN=PAAF1 PE=1 SV=2	11	4	6	4	392	42.2	6.32	124	87	93.3	97.9	105	109.3	107.5
A8K0R7	ZNF839	Zinc finger protein 839 OS=Homo sapiens OX=9606 GN=ZNF839 PE=2 SV=1	2	1	1	1	811	87.4	6.54	0
Q9NXS2	QPCTL	Glutaminyl-peptide cyclotransferase-like protein OS=Homo sapiens OX=9606 GN=QPCTL PE=1 SV=2	7	4	4	4	382	42.9	9.82	25	98	93.8	90.7	104.5	106.2	106.8
Q7Z2E3	APTX	Aprataxin OS=Homo sapiens OX=9606 GN=APTX PE=1 SV=2	4	1	1	1	356	40.7	9.17	22	96.4	96.9	100.1	106.4	101.1	99.2
Q8NBU5	ATAD1	ATPase family AAA domain-containing protein 1 OS=Homo sapiens OX=9606 GN=ATAD1 PE=1 SV=1	19	5	8	5	361	40.7	6.9	228	97.9	99.9	99	99.3	98.7	105.2
Q8WWV3	RTN4IP1	Reticulon-4-interacting protein 1, mitochondrial OS=Homo sapiens OX=9606 GN=RTN4IP1 PE=1 SV=2	4	1	1	1	396	43.6	9.11	14
P08133	ANXA6	Annexin A6 OS=Homo sapiens OX=9606 GN=ANXA6 PE=1 SV=3	72	48	125	48	673	75.8	5.6	2867	94.3	100.4	93.5	104.6	105.9	101.3
P26373	RPL13	60S ribosomal protein L13 OS=Homo sapiens OX=9606 GN=RPL13 PE=1 SV=4	43	10	23	10	211	24.2	11.65	428	103.6	103.4	103.2	96.1	98.3	95.3
O94854	KIAA0754	Uncharacterized protein KIAA0754 OS=Homo sapiens OX=9606 GN=KIAA0754 PE=2 SV=4	1	1	2	1	1291	135.1	4.21	20	90.2	80.4	85.8	135.1	102.3	106.2
O43422	THAP12	52 kDa repressor of the inhibitor of the protein kinase OS=Homo sapiens OX=9606 GN=THAP12 PE=1 SV=2	1	1	1	1	761	87.6	5.86	0
O00308	WWP2	NEDD4-like E3 ubiquitin-protein ligase WWP2 OS=Homo sapiens OX=9606 GN=WWP2 PE=1 SV=2	11	8	9	5	870	98.9	7.12	169	87.3	101.2	110.7	98.6	99	103.2
P23786	CPT2	Carnitine O-palmitoyltransferase 2, mitochondrial OS=Homo sapiens OX=9606 GN=CPT2 PE=1 SV=2	20	10	12	10	658	73.7	8.18	238	96.7	97.3	90.3	107.4	103.2	105.1
Q12792	TWF1	Twinfilin-1 OS=Homo sapiens OX=9606 GN=TWF1 PE=1 SV=3	37	11	15	8	350	40.3	6.96	280	89.7	91.5	92.9	110.8	106	109
Q8N2G8	GHDC	GH3 domain-containing protein OS=Homo sapiens OX=9606 GN=GHDC PE=1 SV=2	6	3	4	3	530	57.5	7.88	120	102.1	104.2	98.8	98.7	96.2	100.1
P48426	PIP4K2A	Phosphatidylinositol 5-phosphate 4-kinase type-2 alpha OS=Homo sapiens OX=9606 GN=PIP4K2A PE=1 SV=2	25	9	10	4	406	46.2	6.99	288	96.7	101.5	99.2	98.5	100.9	103.4
Q8N573	OXR1	Oxidation resistance protein 1 OS=Homo sapiens OX=9606 GN=OXR1 PE=1 SV=2	6	4	4	4	874	97.9	5.47	58	102.6	102.9	100.7	97.6	94.9	101.4
Q12906	ILF3	Interleukin enhancer-binding factor 3 OS=Homo sapiens OX=9606 GN=ILF3 PE=1 SV=3	45	35	96	30	894	95.3	8.76	1533	103.4	105	103.6	94.4	97.6	96
P78417	GSTO1	Glutathione S-transferase omega-1 OS=Homo sapiens OX=9606 GN=GSTO1 PE=1 SV=2	66	20	40	20	241	27.5	6.6	655	98.8	101.8	93.2	104.8	103.8	97.6
Q9Y5A7	NUB1	NEDD8 ultimate buster 1 OS=Homo sapiens OX=9606 GN=NUB1 PE=1 SV=2	15	8	11	8	615	70.5	5.96	256	101	100.3	101.5	103.2	95.9	98.1
Q6PGP7	TTC37	Tetratricopeptide repeat protein 37 OS=Homo sapiens OX=9606 GN=TTC37 PE=1 SV=1	5	5	5	5	1564	175.4	7.53	116	90.8	92.7	95.7	112.3	104.5	104
Q03013	GSTM4	Glutathione S-transferase Mu 4 OS=Homo sapiens OX=9606 GN=GSTM4 PE=1 SV=3	43	8	10	2	218	25.5	5.9	176	97.1	84.5	95.2	116.8	102.2	104.2
P48556	PSMD8	26S proteasome non-ATPase regulatory subunit 8 OS=Homo sapiens OX=9606 GN=PSMD8 PE=1 SV=2	34	14	18	14	350	39.6	9.7	223	99.8	101.5	98.6	99.4	102.2	98.4
Q8IWJ2	GCC2	GRIP and coiled-coil domain-containing protein 2 OS=Homo sapiens OX=9606 GN=GCC2 PE=1 SV=4	6	10	11	9	1684	195.8	5.14	246	92.8	87.9	96.7	111.4	103.1	108.1
O75449	KATNA1	Katanin p60 ATPase-containing subunit A1 OS=Homo sapiens OX=9606 GN=KATNA1 PE=1 SV=1	11	5	6	4	491	55.9	6.9	113	108	99.7	106.4	96	95.5	94.4
P54578	USP14	Ubiquitin carboxyl-terminal hydrolase 14 OS=Homo sapiens OX=9606 GN=USP14 PE=1 SV=3	55	26	42	26	494	56	5.3	1206	102.6	103.2	101.8	97.7	101.2	93.5
P07305	H1-0	Histone H1.0 OS=Homo sapiens OX=9606 GN=H1-0 PE=1 SV=3	27	5	11	5	194	20.9	10.84	190	113.7	122.6	103.1	84.1	89.5	87.1
O14936	CASK	Peripheral plasma membrane protein CASK OS=Homo sapiens OX=9606 GN=CASK PE=1 SV=3	17	13	13	13	926	105.1	6.43	219	93.2	97.1	95.1	107.1	104	103.5
Q9UPW6	SATB2	DNA-binding protein SATB2 OS=Homo sapiens OX=9606 GN=SATB2 PE=1 SV=2	1	1	1	1	733	82.5	6.9	17	104.5	93.1	100.4	105.4	97.7	98.9
P23368	ME2	NAD-dependent malic enzyme, mitochondrial OS=Homo sapiens OX=9606 GN=ME2 PE=1 SV=1	45	15	21	14	584	65.4	7.61	625	102.6	103.8	101.5	98	97.4	96.7
P08729	KRT7	Keratin, type II cytoskeletal 7 OS=Homo sapiens OX=9606 GN=KRT7 PE=1 SV=5	59	31	93	26	469	51.4	5.48	1883	103	102.1	97.1	99.9	99.7	98.2
Q9BWJ5	SF3B5	Splicing factor 3B subunit 5 OS=Homo sapiens OX=9606 GN=SF3B5 PE=1 SV=1	45	3	7	3	86	10.1	6.35	146	101	105.1	106.8	93.8	98.4	94.9
Q13888	GTF2H2	General transcription factor IIH subunit 2 OS=Homo sapiens OX=9606 GN=GTF2H2 PE=1 SV=1	9	4	5	4	395	44.4	6.76	77	93.3	89.5	93.7	113.3	108.3	101.9
Q14807	KIF22	Kinesin-like protein KIF22 OS=Homo sapiens OX=9606 GN=KIF22 PE=1 SV=5	6	3	3	3	665	73.2	9.45	63	108.6	109.8	110.2	93.1	86.2	92.1
Q01432	AMPD3	AMP deaminase 3 OS=Homo sapiens OX=9606 GN=AMPD3 PE=1 SV=1	12	9	9	9	767	88.8	6.98	178	90.6	85.9	78	121.3	113.6	110.5
P84243	H3-3A	Histone H3.3 OS=Homo sapiens OX=9606 GN=H3-3A PE=1 SV=2	56	7	36	2	136	15.3	11.27	542	102.4	112.4	105.9	87.9	96.8	94.7
Q5TA50	CPTP	Ceramide-1-phosphate transfer protein OS=Homo sapiens OX=9606 GN=CPTP PE=1 SV=1	3	1	1	1	214	24.4	7.21	16
Q99961	SH3GL1	Endophilin-A2 OS=Homo sapiens OX=9606 GN=SH3GL1 PE=1 SV=1	44	16	30	15	368	41.5	5.43	396	103.5	105.8	103.1	92.7	96.5	98.5
P53803	POLR2K	DNA-directed RNA polymerases I, II, and III subunit RPABC4 OS=Homo sapiens OX=9606 GN=POLR2K PE=1 SV=1	43	2	2	2	58	7	9.06	81	104.7	95.2	109.5	101.4	91.8	97.5
Q86UL3	GPAT4	Glycerol-3-phosphate acyltransferase 4 OS=Homo sapiens OX=9606 GN=GPAT4 PE=1 SV=1	14	5	7	4	456	52	9.19	147	98.6	105.3	100.3	98.8	98.3	98.6
P21912	SDHB	Succinate dehydrogenase [ubiquinone] iron-sulfur subunit, mitochondrial OS=Homo sapiens OX=9606 GN=SDHB PE=1 SV=3	44	11	16	11	280	31.6	8.76	137	94.3	99.2	94.3	108.7	102.8	100.8
P20020	ATP2B1	Plasma membrane calcium-transporting ATPase 1 OS=Homo sapiens OX=9606 GN=ATP2B1 PE=1 SV=4	20	22	35	13	1220	134.6	5.91	967	96.6	94.6	91.1	106.9	107.9	102.9
Q96QD8	SLC38A2	Sodium-coupled neutral amino acid transporter 2 OS=Homo sapiens OX=9606 GN=SLC38A2 PE=1 SV=2	12	3	3	3	506	56	8	150	100.8	87.6	100.5	111	96.7	103.4
Q06481	APLP2	Amyloid-like protein 2 OS=Homo sapiens OX=9606 GN=APLP2 PE=1 SV=2	33	19	29	19	763	86.9	4.79	642	93.1	93.7	91.2	112.2	102.8	106.9
O00267	SUPT5H	Transcription elongation factor SPT5 OS=Homo sapiens OX=9606 GN=SUPT5H PE=1 SV=1	30	26	32	26	1087	120.9	5.06	729	101.2	97.1	103.5	100.6	97.7	100
P53701	HCCS	Cytochrome c-type heme lyase OS=Homo sapiens OX=9606 GN=HCCS PE=1 SV=1	24	6	7	6	268	30.6	6.68	126	90.1	89.3	89.6	113.1	108.8	109.1
Q9Y3D7	PAM16	Mitochondrial import inner membrane translocase subunit TIM16 OS=Homo sapiens OX=9606 GN=PAM16 PE=1 SV=2	38	4	8	4	125	13.8	9.7	157	102.1	94.5	103.7	101.9	97.1	100.8
Q92620	DHX38	Pre-mRNA-splicing factor ATP-dependent RNA helicase PRP16 OS=Homo sapiens OX=9606 GN=DHX38 PE=1 SV=2	11	11	14	10	1227	140.4	6.54	205	101.1	98.2	103.2	97.5	98.1	101.8
P46926	GNPDA1	Glucosamine-6-phosphate isomerase 1 OS=Homo sapiens OX=9606 GN=GNPDA1 PE=1 SV=1	70	14	25	9	289	32.6	6.92	678	105.6	98.1	101.6	97.5	100.3	97
P20933	AGA	N(4)-(beta-N-acetylglucosaminyl)-L-asparaginase OS=Homo sapiens OX=9606 GN=AGA PE=1 SV=2	3	1	1	1	346	37.2	6.28	0	93.9	92	97.6	107.7	104.2	104.6
Q8NHU6	TDRD7	Tudor domain-containing protein 7 OS=Homo sapiens OX=9606 GN=TDRD7 PE=1 SV=2	6	5	6	5	1098	123.5	7.21	128	103.6	96.5	102.3	102.3	95.5	99.8
O43688	PLPP2	Phospholipid phosphatase 2 OS=Homo sapiens OX=9606 GN=PLPP2 PE=1 SV=1	7	2	2	2	288	32.6	8.35	40	95.3	90.7	97.6	109.6	99.8	107
Q9Y6M7	SLC4A7	Sodium bicarbonate cotransporter 3 OS=Homo sapiens OX=9606 GN=SLC4A7 PE=1 SV=2	4	4	4	4	1214	136	6.71	67	100.6	94.1	98.1	99.9	104	103.3
Q6IPM2	IQCE	IQ domain-containing protein E OS=Homo sapiens OX=9606 GN=IQCE PE=1 SV=2	2	1	1	1	695	77.3	9.07	34
O60930	RNASEH1	Ribonuclease H1 OS=Homo sapiens OX=9606 GN=RNASEH1 PE=1 SV=2	4	1	1	1	286	32	9.16	0	99.1	107.6	93.1	103.9	96.9	99.4
P25208	NFYB	Nuclear transcription factor Y subunit beta OS=Homo sapiens OX=9606 GN=NFYB PE=1 SV=2	16	2	2	2	207	22.8	4.59	90	99.5	106.8	103.7	94	103.9	92
Q96EB6	SIRT1	NAD-dependent protein deacetylase sirtuin-1 OS=Homo sapiens OX=9606 GN=SIRT1 PE=1 SV=2	5	2	2	2	747	81.6	4.67	35	102.9	102.4	110	93.9	87.7	102.9
Q9NP77	SSU72	RNA polymerase II subunit A C-terminal domain phosphatase SSU72 OS=Homo sapiens OX=9606 GN=SSU72 PE=1 SV=1	18	3	4	3	194	22.6	5.33	80	101.9	104.2	104.6	97.1	93.5	98.8
O14976	GAK	Cyclin-G-associated kinase OS=Homo sapiens OX=9606 GN=GAK PE=1 SV=2	7	7	7	7	1311	143.1	5.73	122	96.8	99.8	97.2	103	99.6	103.5
Q9UKV8	AGO2	Protein argonaute-2 OS=Homo sapiens OX=9606 GN=AGO2 PE=1 SV=3	33	22	31	19	859	97.1	9.19	563	86.3	85	86.1	113.2	115.4	114.1
Q969Y2	GTPBP3	tRNA modification GTPase GTPBP3, mitochondrial OS=Homo sapiens OX=9606 GN=GTPBP3 PE=1 SV=2	4	1	1	1	492	52	6.48	44
O95251	KAT7	Histone acetyltransferase KAT7 OS=Homo sapiens OX=9606 GN=KAT7 PE=1 SV=1	4	2	2	1	611	70.6	8.85	69	110.6	99.2	112.2	92	93.6	92.3
Q86VP6	CAND1	Cullin-associated NEDD8-dissociated protein 1 OS=Homo sapiens OX=9606 GN=CAND1 PE=1 SV=2	45	47	82	47	1230	136.3	5.78	1966	100.7	104.6	98.3	98.3	99.1	99
Q9P003	CNIH4	Protein cornichon homolog 4 OS=Homo sapiens OX=9606 GN=CNIH4 PE=1 SV=1	14	1	2	1	139	16.1	6.65	52	99	96.1	102.4	101.2	92.4	109
Q13561	DCTN2	Dynactin subunit 2 OS=Homo sapiens OX=9606 GN=DCTN2 PE=1 SV=4	69	20	33	20	401	44.2	5.21	913	96.2	97.6	94.8	107.3	103	101.2
Q9NY35	CLDND1	Claudin domain-containing protein 1 OS=Homo sapiens OX=9606 GN=CLDND1 PE=1 SV=1	14	3	5	3	253	28.6	5.82	133	97.8	99	99.9	101.1	101.8	100.6
Q96IG2	FBXL20	F-box/LRR-repeat protein 20 OS=Homo sapiens OX=9606 GN=FBXL20 PE=1 SV=2	3	1	1	1	436	48.4	7.49	0	110	107	102.6	92.5	88	100
P48553	TRAPPC10	Trafficking protein particle complex subunit 10 OS=Homo sapiens OX=9606 GN=TRAPPC10 PE=1 SV=2	2	2	2	2	1259	142.1	6.04	0	97.5	107.5	106.5	92.3	102	94.1
P24844	MYL9	Myosin regulatory light polypeptide 9 OS=Homo sapiens OX=9606 GN=MYL9 PE=1 SV=4	66	9	26	3	172	19.8	4.92	453	89.6	95.8	90.2	113.2	107.4	103.9
Q9UHW5	GPN3	GPN-loop GTPase 3 OS=Homo sapiens OX=9606 GN=GPN3 PE=1 SV=2	22	4	4	4	284	32.7	4.5	155	104.3	99.9	104.6	95.4	95.7	100.1
P62820	RAB1A	Ras-related protein Rab-1A OS=Homo sapiens OX=9606 GN=RAB1A PE=1 SV=3	77	13	63	6	205	22.7	6.21	1780	97.7	99.6	98.2	103	102.5	99
P55042	RRAD	GTP-binding protein RAD OS=Homo sapiens OX=9606 GN=RRAD PE=1 SV=2	11	2	2	1	308	33.2	8.88	34	101.7	97.5	102.9	102.5	94.5	100.9
P48059	LIMS1	LIM and senescent cell antigen-like-containing domain protein 1 OS=Homo sapiens OX=9606 GN=LIMS1 PE=1 SV=4	37	11	13	6	325	37.2	8.05	169	97.6	100.9	101.1	102.3	99.2	99
Q6ZW49	PAXIP1	PAX-interacting protein 1 OS=Homo sapiens OX=9606 GN=PAXIP1 PE=1 SV=2	1	1	1	1	1069	121.3	6.7	20	101.6	95.9	102.9	103.7	95.4	100.4
Q8NDD1	C1orf131	Uncharacterized protein C1orf131 OS=Homo sapiens OX=9606 GN=C1orf131 PE=1 SV=4	4	1	1	1	293	32.6	9.88	13	114.2	105.8	102.6	97.3	91.4	88.8
Q96CT2	KLHL29	Kelch-like protein 29 OS=Homo sapiens OX=9606 GN=KLHL29 PE=1 SV=3	1	1	1	1	875	94.2	7.17	0	104.9	99.5	100	100.4	90	105.3
Q86SX6	GLRX5	Glutaredoxin-related protein 5, mitochondrial OS=Homo sapiens OX=9606 GN=GLRX5 PE=1 SV=2	33	4	5	4	157	16.6	6.79	110	103.8	106.6	106	95.4	95	93.2
Q86UX7	FERMT3	Fermitin family homolog 3 OS=Homo sapiens OX=9606 GN=FERMT3 PE=1 SV=1	11	5	6	5	667	75.9	6.98	84	100.8	101.5	102.2	95.3	99.8	100.3
P11388	TOP2A	DNA topoisomerase 2-alpha OS=Homo sapiens OX=9606 GN=TOP2A PE=1 SV=3	38	55	78	42	1531	174.3	8.72	1671	101.5	99.3	100.1	101.7	98.9	98.5
Q99717	SMAD5	Mothers against decapentaplegic homolog 5 OS=Homo sapiens OX=9606 GN=SMAD5 PE=1 SV=1	13	5	5	4	465	52.2	7.71	82	111.1	107.5	114.1	93.1	81.9	92.3
P13010	XRCC5	X-ray repair cross-complementing protein 5 OS=Homo sapiens OX=9606 GN=XRCC5 PE=1 SV=3	68	39	104	39	732	82.7	5.81	2431	103.6	104.8	101	94.8	99.2	96.5
Q9C0B1	FTO	Alpha-ketoglutarate-dependent dioxygenase FTO OS=Homo sapiens OX=9606 GN=FTO PE=1 SV=3	28	10	13	10	505	58.2	5.22	355	98.8	97.4	99.6	99	101.7	103.5
P21283	ATP6V1C1	V-type proton ATPase subunit C 1 OS=Homo sapiens OX=9606 GN=ATP6V1C1 PE=1 SV=4	48	18	22	18	382	43.9	7.46	410	97.9	101.1	100.7	102.3	99.6	98.4
P05026	ATP1B1	Sodium/potassium-transporting ATPase subunit beta-1 OS=Homo sapiens OX=9606 GN=ATP1B1 PE=1 SV=1	42	12	23	12	303	35	8.53	434	101.8	107	102.5	97.1	98	93.6
Q96KG9	SCYL1	N-terminal kinase-like protein OS=Homo sapiens OX=9606 GN=SCYL1 PE=1 SV=1	21	12	16	12	808	89.6	6.3	262	100.2	100.6	102	98.8	99.4	99.1
Q8WYA6	CTNNBL1	Beta-catenin-like protein 1 OS=Homo sapiens OX=9606 GN=CTNNBL1 PE=1 SV=1	22	14	16	14	563	65.1	5.05	270	104.5	98.4	105.5	97.3	97	97.3
Q9NZM1	MYOF	Myoferlin OS=Homo sapiens OX=9606 GN=MYOF PE=1 SV=1	54	95	139	94	2061	234.6	6.18	2658	97.6	100.4	98.4	101.8	100.5	101.3
Q5TBB1	RNASEH2B	Ribonuclease H2 subunit B OS=Homo sapiens OX=9606 GN=RNASEH2B PE=1 SV=1	28	7	8	7	312	35.1	9.13	84	100.2	101.1	97.5	101.5	100.4	99.4
O00506	STK25	Serine/threonine-protein kinase 25 OS=Homo sapiens OX=9606 GN=STK25 PE=1 SV=1	17	6	11	1	426	48.1	6.74	332	97.1	97.2	101.4	102.2	96	106
Q96IK1	BOD1	Biorientation of chromosomes in cell division protein 1 OS=Homo sapiens OX=9606 GN=BOD1 PE=1 SV=2	18	3	3	2	185	19.2	6.33	26	92.2	93.3	106	88	92.2	128.3
Q8WVV9	HNRNPLL	Heterogeneous nuclear ribonucleoprotein L-like OS=Homo sapiens OX=9606 GN=HNRNPLL PE=1 SV=1	30	11	19	10	542	60	7.72	407	105.5	102.3	100.5	98	97.1	96.7
Q86W92	PPFIBP1	Liprin-beta-1 OS=Homo sapiens OX=9606 GN=PPFIBP1 PE=1 SV=2	11	8	9	8	1011	114	5.55	205	98.7	93	97.7	105.5	101.6	103.4
Q9H444	CHMP4B	Charged multivesicular body protein 4b OS=Homo sapiens OX=9606 GN=CHMP4B PE=1 SV=1	37	9	17	9	224	24.9	4.82	382	95.8	97.9	98.6	102.9	103.4	101.3
P05121	SERPINE1	Plasminogen activator inhibitor 1 OS=Homo sapiens OX=9606 GN=SERPINE1 PE=1 SV=1	33	11	19	11	402	45	7.2	548	78.2	65.3	72.7	143.8	122.3	117.7
O15550	KDM6A	Lysine-specific demethylase 6A OS=Homo sapiens OX=9606 GN=KDM6A PE=1 SV=2	1	2	2	2	1401	154.1	7.44	21	105.7	99.3	106	100.2	95.7	93.1
P08621	SNRNP70	U1 small nuclear ribonucleoprotein 70 kDa OS=Homo sapiens OX=9606 GN=SNRNP70 PE=1 SV=2	32	17	27	17	437	51.5	9.94	359	102.6	101.7	102.8	94.2	97.8	100.9
Q658P3	STEAP3	Metalloreductase STEAP3 OS=Homo sapiens OX=9606 GN=STEAP3 PE=1 SV=2	7	4	4	4	488	54.6	8.6	19	107.7	116.1	105	84.7	89.8	96.7
O00116	AGPS	Alkyldihydroxyacetonephosphate synthase, peroxisomal OS=Homo sapiens OX=9606 GN=AGPS PE=1 SV=1	43	19	28	19	658	72.9	7.34	755	92.7	95.4	97.8	106.3	104.5	103.3
Q969P0	IGSF8	Immunoglobulin superfamily member 8 OS=Homo sapiens OX=9606 GN=IGSF8 PE=1 SV=1	8	3	4	3	613	65	8	118	102.1	99.7	102.3	96.9	97.4	101.6
O95810	CAVIN2	Caveolae-associated protein 2 OS=Homo sapiens OX=9606 GN=CAVIN2 PE=1 SV=3	37	13	21	13	425	47.1	5.21	672	84	86.4	86.5	115.7	114.1	113.4
P15531	NME1	Nucleoside diphosphate kinase A OS=Homo sapiens OX=9606 GN=NME1 PE=1 SV=1	70	11	35	6	152	17.1	6.19	464	115.8	131.5	111.9	80.9	84.2	75.7
Q8TEA7	TBCK	TBC domain-containing protein kinase-like protein OS=Homo sapiens OX=9606 GN=TBCK PE=1 SV=4	1	1	1	1	893	100.6	6.58	32	91	91.9	97.3	116.8	106.1	96.9
Q8IVF7	FMNL3	Formin-like protein 3 OS=Homo sapiens OX=9606 GN=FMNL3 PE=1 SV=3	8	8	11	4	1028	117.1	6.65	148	97.9	92.8	94.1	105.3	104.6	105.4
O43854	EDIL3	EGF-like repeat and discoidin I-like domain-containing protein 3 OS=Homo sapiens OX=9606 GN=EDIL3 PE=1 SV=1	18	8	8	8	480	53.7	7.28	142	93.6	104.6	96.4	98.5	103.2	103.7
Q12899	TRIM26	Tripartite motif-containing protein 26 OS=Homo sapiens OX=9606 GN=TRIM26 PE=1 SV=1	2	1	1	1	539	62.1	5.03	40	82.1	85.2	113.9	111.3	109.8	97.6
P26196	DDX6	Probable ATP-dependent RNA helicase DDX6 OS=Homo sapiens OX=9606 GN=DDX6 PE=1 SV=2	47	16	26	16	483	54.4	8.66	599	105.2	99.7	103.1	98	96.2	97.7
Q8N9N2	ASCC1	Activating signal cointegrator 1 complex subunit 1 OS=Homo sapiens OX=9606 GN=ASCC1 PE=1 SV=1	7	3	3	3	400	45.5	5.54	63	96.6	98	97.8	103	103.9	100.6
Q9NQT5	EXOSC3	Exosome complex component RRP40 OS=Homo sapiens OX=9606 GN=EXOSC3 PE=1 SV=3	47	8	9	8	275	29.6	8.1	186	103.1	98.8	100.1	101	100.2	96.8
Q5F1R6	DNAJC21	DnaJ homolog subfamily C member 21 OS=Homo sapiens OX=9606 GN=DNAJC21 PE=1 SV=2	11	6	6	6	531	62	5.47	91	101.8	103.7	105.2	92.8	101.5	95.1
Q7L8J4	SH3BP5L	SH3 domain-binding protein 5-like OS=Homo sapiens OX=9606 GN=SH3BP5L PE=1 SV=1	16	5	5	5	393	43.5	5.77	80	92.6	90.4	89.9	114.8	104.6	107.7
Q9NRL3	STRN4	Striatin-4 OS=Homo sapiens OX=9606 GN=STRN4 PE=1 SV=2	19	10	13	9	753	80.5	5.4	362	101.4	95.1	101.6	102.7	96.8	102.5
O75695	RP2	Protein XRP2 OS=Homo sapiens OX=9606 GN=RP2 PE=1 SV=4	34	12	16	12	350	39.6	5.12	250	92.9	98	96.1	104.1	103.6	105.3
Q8TCT8	SPPL2A	Signal peptide peptidase-like 2A OS=Homo sapiens OX=9606 GN=SPPL2A PE=1 SV=2	1	1	1	1	520	58.1	8.32	0
Q9NR33	POLE4	DNA polymerase epsilon subunit 4 OS=Homo sapiens OX=9606 GN=POLE4 PE=1 SV=2	32	2	3	2	117	12.2	4.92	100	104.4	95.2	97.1	103.3	100.1	99.9
Q5VTR2	RNF20	E3 ubiquitin-protein ligase BRE1A OS=Homo sapiens OX=9606 GN=RNF20 PE=1 SV=2	18	16	20	14	975	113.6	5.94	542	98.6	100.1	104.5	100.9	96.3	99.6
Q9NV35	NUDT15	Nucleotide triphosphate diphosphatase NUDT15 OS=Homo sapiens OX=9606 GN=NUDT15 PE=1 SV=1	25	3	5	3	164	18.6	6.14	70	96.4	98.8	103.8	98.8	100.7	101.5
Q5JTZ9	AARS2	Alanine--tRNA ligase, mitochondrial OS=Homo sapiens OX=9606 GN=AARS2 PE=1 SV=1	10	6	8	6	985	107.3	6.27	181	102.3	100.6	101.1	96	97.1	102.9
P52739	ZNF131	Zinc finger protein 131 OS=Homo sapiens OX=9606 GN=ZNF131 PE=1 SV=2	2	1	1	1	623	71.4	5.19	34	111.6	99.3	117.6	99	78.6	93.9
P57737	CORO7	Coronin-7 OS=Homo sapiens OX=9606 GN=CORO7 PE=1 SV=2	20	14	16	14	925	100.5	5.8	313	95.9	98	95.3	104.8	103	103
P02100	HBE1	Hemoglobin subunit epsilon OS=Homo sapiens OX=9606 GN=HBE1 PE=1 SV=2	13	2	3	1	147	16.2	8.63	46
O00629	KPNA4	Importin subunit alpha-3 OS=Homo sapiens OX=9606 GN=KPNA4 PE=1 SV=1	30	10	17	5	521	57.9	4.96	428	105.7	113.5	103.5	90.7	98.6	88
Q9GZM7	TINAGL1	Tubulointerstitial nephritis antigen-like OS=Homo sapiens OX=9606 GN=TINAGL1 PE=1 SV=1	8	3	3	3	467	52.4	6.99	72	99.1	111.9	99.7	96	95	98.3
Q9HCE5	METTL14	N6-adenosine-methyltransferase non-catalytic subunit OS=Homo sapiens OX=9606 GN=METTL14 PE=1 SV=2	19	6	6	6	456	52.1	6.21	152	100.3	99.9	98.7	101.9	99.9	99.4
O00159	MYO1C	Unconventional myosin-Ic OS=Homo sapiens OX=9606 GN=MYO1C PE=1 SV=4	50	44	66	43	1063	121.6	9.41	1395	100.4	102.3	99.8	97.8	99.3	100.4
Q9Y6R9	CCDC61	Coiled-coil domain-containing protein 61 OS=Homo sapiens OX=9606 GN=CCDC61 PE=1 SV=3	2	1	1	1	512	57.3	10.27	0
Q9NZJ4	SACS	Sacsin OS=Homo sapiens OX=9606 GN=SACS PE=1 SV=2	10	37	43	37	4579	520.8	7.05	720	100.5	99.1	100	100.1	99.1	101.2
P05388	RPLP0	60S acidic ribosomal protein P0 OS=Homo sapiens OX=9606 GN=RPLP0 PE=1 SV=1	50	14	59	14	317	34.3	5.97	1782	102.7	103.4	102.9	96.9	98.6	95.6
O95164	UBL3	Ubiquitin-like protein 3 OS=Homo sapiens OX=9606 GN=UBL3 PE=1 SV=1	22	3	3	3	117	13.1	6.77	109	96.1	90.2	95.8	105.2	101.8	111
Q13445	TMED1	Transmembrane emp24 domain-containing protein 1 OS=Homo sapiens OX=9606 GN=TMED1 PE=1 SV=1	21	4	4	4	227	25.2	4.48	73	102.3	99.6	100.7	97.6	98.9	100.8
Q8IY67	RAVER1	Ribonucleoprotein PTB-binding 1 OS=Homo sapiens OX=9606 GN=RAVER1 PE=1 SV=1	16	7	8	7	606	63.8	8.48	120	103.1	102.3	105.3	93	95	101.3
Q15048	LRRC14	Leucine-rich repeat-containing protein 14 OS=Homo sapiens OX=9606 GN=LRRC14 PE=1 SV=1	2	1	1	1	493	54.5	6.9	29	92.9	95.5	88	109.4	94.4	119.8
P49848	TAF6	Transcription initiation factor TFIID subunit 6 OS=Homo sapiens OX=9606 GN=TAF6 PE=1 SV=1	3	1	1	1	677	72.6	8.6	14
Q9BXJ9	NAA15	N-alpha-acetyltransferase 15, NatA auxiliary subunit OS=Homo sapiens OX=9606 GN=NAA15 PE=1 SV=1	36	29	44	27	866	101.2	7.42	885	97.3	96.6	98.9	100.9	104	102.2
P01031	C5	Complement C5 OS=Homo sapiens OX=9606 GN=C5 PE=1 SV=4	1	2	2	2	1676	188.2	6.52	31	103.3	99.8	97.7	98.5	102.3	98.6
P06865	HEXA	Beta-hexosaminidase subunit alpha OS=Homo sapiens OX=9606 GN=HEXA PE=1 SV=2	23	12	15	11	529	60.7	5.16	182	95.7	93.8	88.3	115.9	101.9	104.3
Q9BZE9	ASPSCR1	Tether containing UBX domain for GLUT4 OS=Homo sapiens OX=9606 GN=ASPSCR1 PE=1 SV=1	21	7	8	7	553	60.1	6.64	181	99.1	97.7	100.9	101.3	98.4	102.6
Q5T7V8	GORAB	RAB6-interacting golgin OS=Homo sapiens OX=9606 GN=GORAB PE=1 SV=1	16	4	4	4	394	45	7.08	59	96.8	101	98.7	104.7	97.8	101.1
O15226	NKRF	NF-kappa-B-repressing factor OS=Homo sapiens OX=9606 GN=NKRF PE=1 SV=2	13	8	9	8	690	77.6	8.79	187	105.1	100.9	108.2	95.3	95.3	95.3
Q9P0N9	TBC1D7	TBC1 domain family member 7 OS=Homo sapiens OX=9606 GN=TBC1D7 PE=1 SV=1	11	3	3	3	293	34	7.94	22	93.6	92.1	98.7	111	100	104.7
P20248	CCNA2	Cyclin-A2 OS=Homo sapiens OX=9606 GN=CCNA2 PE=1 SV=2	13	3	4	3	432	48.5	6.54	69	109	102.3	116.9	98.8	89.9	83.1
Q8WUI4	HDAC7	Histone deacetylase 7 OS=Homo sapiens OX=9606 GN=HDAC7 PE=1 SV=2	2	2	2	2	952	102.9	7.58	38	107	101.4	105.1	94.8	96	95.6
P34059	GALNS	N-acetylgalactosamine-6-sulfatase OS=Homo sapiens OX=9606 GN=GALNS PE=1 SV=1	3	2	2	2	522	58	6.74	26	93.4	90.4	90	115.7	101.8	108.8
P46527	CDKN1B	Cyclin-dependent kinase inhibitor 1B OS=Homo sapiens OX=9606 GN=CDKN1B PE=1 SV=1	4	1	1	1	198	22.1	7.02	31	95.3	91.6	97.9	108.1	107.2	99.8
Q14651	PLS1	Plastin-1 OS=Homo sapiens OX=9606 GN=PLS1 PE=1 SV=2	37	20	39	15	629	70.2	5.41	853	103.6	102.6	99.3	98	99.3	97.2
Q9Y333	LSM2	U6 snRNA-associated Sm-like protein LSm2 OS=Homo sapiens OX=9606 GN=LSM2 PE=1 SV=1	75	7	9	7	95	10.8	6.52	182	98.8	99.5	97.5	99.6	105.2	99.4
O75347	TBCA	Tubulin-specific chaperone A OS=Homo sapiens OX=9606 GN=TBCA PE=1 SV=3	64	13	25	13	108	12.8	5.29	420	99	104.3	100.8	98.8	99.2	97.9
P14625	HSP90B1	Endoplasmin OS=Homo sapiens OX=9606 GN=HSP90B1 PE=1 SV=1	60	49	191	47	803	92.4	4.84	4569	96.6	97.6	93.7	105.7	104.8	101.7
Q14203	DCTN1	Dynactin subunit 1 OS=Homo sapiens OX=9606 GN=DCTN1 PE=1 SV=3	49	50	76	50	1278	141.6	5.81	1526	97.1	98.3	95	103.7	103.3	102.4
Q6PCB7	SLC27A1	Long-chain fatty acid transport protein 1 OS=Homo sapiens OX=9606 GN=SLC27A1 PE=1 SV=1	13	6	6	5	646	71.1	8.53	100	108.6	109	105.2	89.6	92	95.7
Q92540	SMG7	Protein SMG7 OS=Homo sapiens OX=9606 GN=SMG7 PE=1 SV=2	1	1	1	1	1137	127.2	8.72	19	96.6	97	107.6	98	97.5	103.3
Q9H0E9	BRD8	Bromodomain-containing protein 8 OS=Homo sapiens OX=9606 GN=BRD8 PE=1 SV=2	3	3	3	3	1235	135.3	4.6	39	104.3	102.3	104.5	95.2	96.9	96.8
Q12959	DLG1	Disks large homolog 1 OS=Homo sapiens OX=9606 GN=DLG1 PE=1 SV=2	13	10	13	9	904	100.4	5.76	398	90.3	91.8	92.8	108.3	107.3	109.5
O00217	NDUFS8	NADH dehydrogenase [ubiquinone] iron-sulfur protein 8, mitochondrial OS=Homo sapiens OX=9606 GN=NDUFS8 PE=1 SV=1	27	5	5	5	210	23.7	6.34	112	100.1	104.5	102.7	101	97.3	94.4
Q96AE4	FUBP1	Far upstream element-binding protein 1 OS=Homo sapiens OX=9606 GN=FUBP1 PE=1 SV=3	35	20	27	15	644	67.5	7.61	599	105	101.6	104.7	94.5	97.5	96.7
Q14683	SMC1A	Structural maintenance of chromosomes protein 1A OS=Homo sapiens OX=9606 GN=SMC1A PE=1 SV=2	40	46	60	46	1233	143.1	7.64	1181	104.3	105.4	109.1	92.7	93.8	94.7
Q6PCE3	PGM2L1	Glucose 1,6-bisphosphate synthase OS=Homo sapiens OX=9606 GN=PGM2L1 PE=1 SV=3	19	9	11	8	622	70.4	7.15	172	85.3	86	85	119.3	114.1	110.4
Q7Z7N9	TMEM179B	Transmembrane protein 179B OS=Homo sapiens OX=9606 GN=TMEM179B PE=1 SV=1	7	1	1	1	219	23.5	7.85	66	102.6	92	101.2	92.9	97.5	113.7
Q9BVP2	GNL3	Guanine nucleotide-binding protein-like 3 OS=Homo sapiens OX=9606 GN=GNL3 PE=1 SV=2	37	18	23	16	549	62	9.16	590	112.7	105.8	115.8	87.9	87.6	90.1
Q9HAV0	GNB4	Guanine nucleotide-binding protein subunit beta-4 OS=Homo sapiens OX=9606 GN=GNB4 PE=1 SV=3	47	13	29	6	340	37.5	6	835	92.2	93.5	94.4	104.7	105.8	109.5
Q86YP4	GATAD2A	Transcriptional repressor p66-alpha OS=Homo sapiens OX=9606 GN=GATAD2A PE=1 SV=1	22	10	10	9	633	68	9.94	287	103.8	105.7	109	93.3	92.2	95.9
O14727	APAF1	Apoptotic protease-activating factor 1 OS=Homo sapiens OX=9606 GN=APAF1 PE=1 SV=2	12	12	12	12	1248	141.7	6.4	113	106.3	104.8	101.5	95.3	95.1	96.9
Q9BRX8	PRXL2A	Peroxiredoxin-like 2A OS=Homo sapiens OX=9606 GN=PRXL2A PE=1 SV=3	31	7	12	7	229	25.7	8.84	330	100.6	101.5	96.6	101.9	97.8	101.6
Q9Y606	PUS1	tRNA pseudouridine synthase A OS=Homo sapiens OX=9606 GN=PUS1 PE=1 SV=3	20	8	9	8	427	47.4	8.41	138	102.5	100	99.4	98.3	98.6	101.2
P40763	STAT3	Signal transducer and activator of transcription 3 OS=Homo sapiens OX=9606 GN=STAT3 PE=1 SV=2	32	20	36	20	770	88	6.3	849	90.5	92.8	103.4	107.9	102.6	102.7
P17152	TMEM11	Transmembrane protein 11, mitochondrial OS=Homo sapiens OX=9606 GN=TMEM11 PE=1 SV=1	20	4	5	4	192	21.5	7.36	78	100.9	99.6	97.9	98.3	100.5	102.8
P48594	SERPINB4	Serpin B4 OS=Homo sapiens OX=9606 GN=SERPINB4 PE=1 SV=2	8	3	3	3	390	44.8	6.21	41	75.5	75.1	72.9	120	94.7	161.8
Q9Y394	DHRS7	Dehydrogenase/reductase SDR family member 7 OS=Homo sapiens OX=9606 GN=DHRS7 PE=1 SV=1	38	10	12	10	339	38.3	8.32	210	84.5	89.6	92.9	113.3	111.2	108.5
Q15424	SAFB	Scaffold attachment factor B1 OS=Homo sapiens OX=9606 GN=SAFB PE=1 SV=4	32	28	44	19	915	102.6	5.47	699	102.5	101.4	104.6	96.1	99.6	95.8
Q9UFH2	DNAH17	Dynein heavy chain 17, axonemal OS=Homo sapiens OX=9606 GN=DNAH17 PE=1 SV=3	0	2	2	1	4462	509	5.72	33
Q9H3U1	UNC45A	Protein unc-45 homolog A OS=Homo sapiens OX=9606 GN=UNC45A PE=1 SV=1	41	31	46	31	944	103	6.07	891	97.7	97.1	99.1	102.4	101.9	101.9
P0C7M7	ACSM4	Acyl-coenzyme A synthetase ACSM4, mitochondrial OS=Homo sapiens OX=9606 GN=ACSM4 PE=2 SV=1	2	1	1	1	580	65.7	8.59	0	105.1	101.3	107.9	98.7	93.7	93.3
P27816	MAP4	Microtubule-associated protein 4 OS=Homo sapiens OX=9606 GN=MAP4 PE=1 SV=3	61	58	115	58	1152	120.9	5.43	2726	93	94.2	93.1	108.8	106.4	104.4
P22415	USF1	Upstream stimulatory factor 1 OS=Homo sapiens OX=9606 GN=USF1 PE=1 SV=1	6	2	2	2	310	33.5	5.54	31
Q14331	FRG1	Protein FRG1 OS=Homo sapiens OX=9606 GN=FRG1 PE=1 SV=1	15	3	4	3	258	29.2	9.01	74	104.7	94.1	107.4	97.1	102.7	94
Q8WZ82	OVCA2	Esterase OVCA2 OS=Homo sapiens OX=9606 GN=OVCA2 PE=1 SV=1	26	4	4	4	227	24.4	6.89	164	102.2	106.9	97.8	97.3	97.1	98.6
P13984	GTF2F2	General transcription factor IIF subunit 2 OS=Homo sapiens OX=9606 GN=GTF2F2 PE=1 SV=2	57	11	15	11	249	28.4	9.23	248	103.6	102.9	106	95.4	95.5	96.7
P11216	PYGB	Glycogen phosphorylase, brain form OS=Homo sapiens OX=9606 GN=PYGB PE=1 SV=5	56	43	75	36	843	96.6	6.86	1561	96.1	99.1	94.3	103.8	105.6	101.1
Q96T76	MMS19	MMS19 nucleotide excision repair protein homolog OS=Homo sapiens OX=9606 GN=MMS19 PE=1 SV=2	36	25	35	25	1030	113.2	6.35	1062	101.2	101	101.5	98.7	98.7	98.9
Q9NSK0	KLC4	Kinesin light chain 4 OS=Homo sapiens OX=9606 GN=KLC4 PE=1 SV=3	19	12	15	8	619	68.6	6.18	271	102.3	100.6	97.9	99.5	96.3	103.4
P47895	ALDH1A3	Aldehyde dehydrogenase family 1 member A3 OS=Homo sapiens OX=9606 GN=ALDH1A3 PE=1 SV=2	4	2	2	1	512	56.1	7.25	0	96.2	99	100.9	108.4	95	100.5
P30050	RPL12	60S ribosomal protein L12 OS=Homo sapiens OX=9606 GN=RPL12 PE=1 SV=1	67	9	24	9	165	17.8	9.42	531	98.4	98.1	99	99.6	99.6	105.2
Q7Z2W4	ZC3HAV1	Zinc finger CCCH-type antiviral protein 1 OS=Homo sapiens OX=9606 GN=ZC3HAV1 PE=1 SV=3	23	16	18	16	902	101.4	8.4	464	100.1	96.1	104.1	103.1	96.7	99.8
Q86YQ8	CPNE8	Copine-8 OS=Homo sapiens OX=9606 GN=CPNE8 PE=1 SV=2	6	3	3	2	564	63.1	5.96	49	103.4	100	110	90.4	93.7	102.5
Q9H3L0	MMADHC	Methylmalonic aciduria and homocystinuria type D protein, mitochondrial OS=Homo sapiens OX=9606 GN=MMADHC PE=1 SV=2	4	1	1	1	296	32.9	5.29	38
Q9UBU9	NXF1	Nuclear RNA export factor 1 OS=Homo sapiens OX=9606 GN=NXF1 PE=1 SV=1	37	19	25	19	619	70.1	8.51	480	102	99	103.2	96.4	100.8	98.6
Q14192	FHL2	Four and a half LIM domains protein 2 OS=Homo sapiens OX=9606 GN=FHL2 PE=1 SV=3	50	11	14	11	279	32.2	7.55	120	93.1	82.3	96.6	121.5	103	103.5
Q92845	KIFAP3	Kinesin-associated protein 3 OS=Homo sapiens OX=9606 GN=KIFAP3 PE=1 SV=2	5	3	4	2	792	91.1	5.08	67	94.2	94.3	85.9	111.2	104.5	109.9
Q9P035	HACD3	Very-long-chain (3R)-3-hydroxyacyl-CoA dehydratase 3 OS=Homo sapiens OX=9606 GN=HACD3 PE=1 SV=2	25	9	13	9	362	43.1	8.94	197	87.2	97.9	93.1	107.6	108.1	106.1
Q9NVQ4	FAIM	Fas apoptotic inhibitory molecule 1 OS=Homo sapiens OX=9606 GN=FAIM PE=1 SV=1	5	1	1	1	179	20.2	5.83	29	99.7	103.1	100.7	98.5	103.3	94.8
P13671	C6	Complement component C6 OS=Homo sapiens OX=9606 GN=C6 PE=1 SV=3	2	1	1	1	934	104.7	6.76	0	102.2	90.6	96	112.6	101.7	96.8
O75964	ATP5MG	ATP synthase subunit g, mitochondrial OS=Homo sapiens OX=9606 GN=ATP5MG PE=1 SV=3	53	5	8	5	103	11.4	9.64	156	100.9	102.7	99	98	97.9	101.5
Q9H4Z3	PCIF1	mRNA (2'-O-methyladenosine-N(6)-)-methyltransferase OS=Homo sapiens OX=9606 GN=PCIF1 PE=1 SV=1	6	3	3	3	704	80.6	7.42	28	67.5	136.8	163.7	107.3	65.4	59.3
Q01085	TIAL1	Nucleolysin TIAR OS=Homo sapiens OX=9606 GN=TIAL1 PE=1 SV=1	27	8	11	5	375	41.6	7.74	285	105.4	104.9	111.2	90.8	95.8	91.8
Q15326	ZMYND11	Zinc finger MYND domain-containing protein 11 OS=Homo sapiens OX=9606 GN=ZMYND11 PE=1 SV=2	5	3	3	3	602	70.9	8.53	23	101.4	91.1	101.4	103.2	99.5	103.4
P48728	AMT	Aminomethyltransferase, mitochondrial OS=Homo sapiens OX=9606 GN=AMT PE=1 SV=1	2	1	1	1	403	43.9	8.57	0	94.6	101.3	96.7	104.6	97.1	105.8
Q99567	NUP88	Nuclear pore complex protein Nup88 OS=Homo sapiens OX=9606 GN=NUP88 PE=1 SV=2	25	14	16	14	741	83.5	5.69	280	100.4	100.1	100.6	100	100.4	98.4
Q8IWZ3	ANKHD1	Ankyrin repeat and KH domain-containing protein 1 OS=Homo sapiens OX=9606 GN=ANKHD1 PE=1 SV=1	11	20	24	11	2542	269.3	5.73	764	98.1	95.4	100.3	100.8	101.2	104.3
Q14554	PDIA5	Protein disulfide-isomerase A5 OS=Homo sapiens OX=9606 GN=PDIA5 PE=1 SV=1	26	13	17	13	519	59.6	7.91	296	97.5	98.6	95	101.7	104.7	102.5
P24311	COX7B	Cytochrome c oxidase subunit 7B, mitochondrial OS=Homo sapiens OX=9606 GN=COX7B PE=1 SV=2	9	1	2	1	80	9.2	10.27	18	91.5	90.1	99.6	114.7	104.6	99.6
Q96C36	PYCR2	Pyrroline-5-carboxylate reductase 2 OS=Homo sapiens OX=9606 GN=PYCR2 PE=1 SV=1	27	8	12	7	320	33.6	7.77	258	109.5	107.8	110.9	87.5	90.7	93.6
Q5T1J5	CHCHD2P9	Putative coiled-coil-helix-coiled-coil-helix domain-containing protein CHCHD2P9, mitochondrial OS=Homo sapiens OX=9606 GN=CHCHD2P9 PE=5 SV=1	9	1	2	1	151	15.5	9.89	68	116.2	108.2	103.3	89.2	92.7	90.3
Q9BZ95	NSD3	Histone-lysine N-methyltransferase NSD3 OS=Homo sapiens OX=9606 GN=NSD3 PE=1 SV=1	1	2	2	1	1437	161.5	8.21	19	90.6	102.2	110	88.8	82.4	126
Q8IZH2	XRN1	5'-3' exoribonuclease 1 OS=Homo sapiens OX=9606 GN=XRN1 PE=1 SV=1	4	7	7	7	1706	194	7.21	40	97.7	97.5	101.6	99.7	99.9	103.7
Q9BY44	EIF2A	Eukaryotic translation initiation factor 2A OS=Homo sapiens OX=9606 GN=EIF2A PE=1 SV=3	54	25	39	25	585	64.9	8.87	947	97.2	96.4	102.2	103.4	100.5	100.3
Q9BQA1	WDR77	Methylosome protein 50 OS=Homo sapiens OX=9606 GN=WDR77 PE=1 SV=1	37	8	12	8	342	36.7	5.17	348	105.3	94.8	101.1	97.6	98.8	102.4
Q86X55	CARM1	Histone-arginine methyltransferase CARM1 OS=Homo sapiens OX=9606 GN=CARM1 PE=1 SV=3	22	12	15	12	608	65.8	6.73	286	103.3	99	98.1	98.6	103.6	97.3
P28074	PSMB5	Proteasome subunit beta type-5 OS=Homo sapiens OX=9606 GN=PSMB5 PE=1 SV=3	55	13	31	13	263	28.5	6.92	1031	98.5	99.6	100	100.5	101.8	99.6
Q9ULH1	ASAP1	Arf-GAP with SH3 domain, ANK repeat and PH domain-containing protein 1 OS=Homo sapiens OX=9606 GN=ASAP1 PE=1 SV=4	14	13	15	12	1129	125.4	7.31	268	108.9	113.2	107.6	88.2	91.2	91
P01889	HLA-B	HLA class I histocompatibility antigen, B alpha chain OS=Homo sapiens OX=9606 GN=HLA-B PE=1 SV=3	35	9	20	3	362	40.4	5.85	444	91.2	90.2	90	116.4	104.9	107.3
Q96Q11	TRNT1	CCA tRNA nucleotidyltransferase 1, mitochondrial OS=Homo sapiens OX=9606 GN=TRNT1 PE=1 SV=2	26	9	10	9	434	50.1	8.1	84	103.2	101.3	100.7	95.7	98.7	100.4
P98194	ATP2C1	Calcium-transporting ATPase type 2C member 1 OS=Homo sapiens OX=9606 GN=ATP2C1 PE=1 SV=3	7	5	7	5	919	100.5	6.74	237	97.2	94	94.1	105.2	103.3	106.2
Q8TAQ2	SMARCC2	SWI/SNF complex subunit SMARCC2 OS=Homo sapiens OX=9606 GN=SMARCC2 PE=1 SV=1	20	23	29	16	1214	132.8	5.69	622	101.1	99.2	99.2	100.9	98.2	101.4
Q96D05	FAM241B	Protein FAM241B OS=Homo sapiens OX=9606 GN=FAM241B PE=1 SV=1	11	1	1	1	121	13.2	11.58	53	97.2	97.5	103.2	98.1	99.3	104.6
O14641	DVL2	Segment polarity protein dishevelled homolog DVL-2 OS=Homo sapiens OX=9606 GN=DVL2 PE=1 SV=1	7	4	4	3	736	78.9	6.02	54	101.8	101	104.7	99.5	93.8	99.2
Q01844	EWSR1	RNA-binding protein EWS OS=Homo sapiens OX=9606 GN=EWSR1 PE=1 SV=1	11	6	8	6	656	68.4	9.33	161	96.9	96.2	99.4	102.6	104.3	100.6
P80297	MT1X	Metallothionein-1X OS=Homo sapiens OX=9606 GN=MT1X PE=1 SV=1	67	4	13	1	61	6.1	7.96	149	81.3	80	94.5	124	107.3	112.9
Q2M2I8	AAK1	AP2-associated protein kinase 1 OS=Homo sapiens OX=9606 GN=AAK1 PE=1 SV=3	16	11	13	10	961	103.8	6.6	318	95.6	98.2	97.8	102.9	104.2	101.3
Q13268	DHRS2	Dehydrogenase/reductase SDR family member 2, mitochondrial OS=Homo sapiens OX=9606 GN=DHRS2 PE=1 SV=4	3	1	1	1	280	29.9	9.01	29
Q16576	RBBP7	Histone-binding protein RBBP7 OS=Homo sapiens OX=9606 GN=RBBP7 PE=1 SV=1	36	13	23	6	425	47.8	5.05	417	101.7	100.2	102.1	99.8	96.9	99.4
Q8WUB8	PHF10	PHD finger protein 10 OS=Homo sapiens OX=9606 GN=PHF10 PE=1 SV=3	4	1	2	1	498	56	6.62	77	102.2	97.3	101.9	94.5	101.2	102.9
Q9Y6M1	IGF2BP2	Insulin-like growth factor 2 mRNA-binding protein 2 OS=Homo sapiens OX=9606 GN=IGF2BP2 PE=1 SV=2	37	19	27	16	599	66.1	8.46	494	98.1	95.9	96.4	104.6	103.1	102
Q9P0J1	PDP1	[Pyruvate dehydrogenase [acetyl-transferring]]-phosphatase 1, mitochondrial OS=Homo sapiens OX=9606 GN=PDP1 PE=1 SV=3	16	7	8	7	537	61	6.67	202	97.4	99.4	98	107.2	96.3	101.6
Q7Z7F0	KHDC4	KH homology domain-containing protein 4 OS=Homo sapiens OX=9606 GN=KHDC4 PE=1 SV=1	11	5	6	5	614	64.8	8.73	67	102.2	102.3	105.7	94.8	96.5	98.5
P06307	CCK	Cholecystokinin OS=Homo sapiens OX=9606 GN=CCK PE=1 SV=1	8	1	1	1	115	12.7	9.01	0	85.7	83.8	90.2	80.8	91.7	167.8
Q8TAA9	VANGL1	Vang-like protein 1 OS=Homo sapiens OX=9606 GN=VANGL1 PE=1 SV=1	3	1	1	1	524	59.9	8.81	60
Q86YS7	C2CD5	C2 domain-containing protein 5 OS=Homo sapiens OX=9606 GN=C2CD5 PE=1 SV=1	2	2	2	2	1000	110.4	5.69	65	102.1	98	95.9	103.5	104	96.4
O15231	ZNF185	Zinc finger protein 185 OS=Homo sapiens OX=9606 GN=ZNF185 PE=1 SV=3	36	19	24	19	689	73.5	7.01	452	98.8	94.8	98	103.4	101.8	103.2
Q96EL3	MRPL53	39S ribosomal protein L53, mitochondrial OS=Homo sapiens OX=9606 GN=MRPL53 PE=1 SV=1	34	4	5	4	112	12.1	8.76	95	106.6	103.2	102.4	94.4	96.5	96.9
P43121	MCAM	Cell surface glycoprotein MUC18 OS=Homo sapiens OX=9606 GN=MCAM PE=1 SV=2	29	14	24	14	646	71.6	5.76	520	90	85.1	84	117.8	112.4	110.8
Q70IA8	MOB3C	MOB kinase activator 3C OS=Homo sapiens OX=9606 GN=MOB3C PE=1 SV=1	12	3	3	2	216	25.6	8.79	0	103.7	102.1	103.4	95.7	92.9	102.2
P05412	JUN	Transcription factor AP-1 OS=Homo sapiens OX=9606 GN=JUN PE=1 SV=2	15	4	5	3	331	35.7	8.76	178	104.6	107	110.8	86.6	95.4	95.6
Q5JPH6	EARS2	Probable glutamate--tRNA ligase, mitochondrial OS=Homo sapiens OX=9606 GN=EARS2 PE=1 SV=2	22	10	11	10	523	58.7	8.76	205	100.4	98.3	103.9	102.2	96.6	98.7
Q9UID3	VPS51	Vacuolar protein sorting-associated protein 51 homolog OS=Homo sapiens OX=9606 GN=VPS51 PE=1 SV=2	18	10	13	10	782	86	6.47	281	100.5	97.7	99.6	101.9	98.6	101.8
Q9BT22	ALG1	Chitobiosyldiphosphodolichol beta-mannosyltransferase OS=Homo sapiens OX=9606 GN=ALG1 PE=1 SV=2	10	4	5	4	464	52.5	7.23	130	100.7	96	99.7	96.2	98.4	109
Q92614	MYO18A	Unconventional myosin-XVIIIa OS=Homo sapiens OX=9606 GN=MYO18A PE=1 SV=3	14	22	23	22	2054	233	6.3	544	100.3	107.6	102.2	94.9	96	99
Q13131	PRKAA1	5'-AMP-activated protein kinase catalytic subunit alpha-1 OS=Homo sapiens OX=9606 GN=PRKAA1 PE=1 SV=4	29	13	16	10	559	64	8.12	365	96	94.8	94.4	105.9	105.5	103.3
Q9NQE9	HINT3	Histidine triad nucleotide-binding protein 3 OS=Homo sapiens OX=9606 GN=HINT3 PE=1 SV=1	16	2	2	2	182	20.3	6.6	99	101.7	95.9	92.2	108.3	103.2	98.7
Q13257	MAD2L1	Mitotic spindle assembly checkpoint protein MAD2A OS=Homo sapiens OX=9606 GN=MAD2L1 PE=1 SV=1	40	8	13	8	205	23.5	5.08	230	103.5	101.6	106.8	97.2	94	96.9
Q9UKV3	ACIN1	Apoptotic chromatin condensation inducer in the nucleus OS=Homo sapiens OX=9606 GN=ACIN1 PE=1 SV=2	16	19	26	19	1341	151.8	6.43	536	101.4	102.3	104.9	93.8	98.5	99.2
P49257	LMAN1	Protein ERGIC-53 OS=Homo sapiens OX=9606 GN=LMAN1 PE=1 SV=2	40	20	29	20	510	57.5	6.77	428	95.3	98	96.5	107.7	99.6	102.9
O43760	SYNGR2	Synaptogyrin-2 OS=Homo sapiens OX=9606 GN=SYNGR2 PE=1 SV=1	13	3	4	3	224	24.8	4.94	119	90.6	93.2	92.5	105.5	106.9	111.2
P02042	HBD	Hemoglobin subunit delta OS=Homo sapiens OX=9606 GN=HBD PE=1 SV=2	13	2	5	1	147	16	8.05	69	103.9	99.9	93.6	98.9	98.4	105.3
Q9NPE3	NOP10	H/ACA ribonucleoprotein complex subunit 3 OS=Homo sapiens OX=9606 GN=NOP10 PE=1 SV=1	20	1	2	1	64	7.7	9.99	46	96.7	103	105.5	96.1	99.5	99.2
Q9P1U0	ZNRD1	DNA-directed RNA polymerase I subunit RPA12 OS=Homo sapiens OX=9606 GN=ZNRD1 PE=2 SV=1	13	1	1	1	126	13.9	5.06	31
Q99832	CCT7	T-complex protein 1 subunit eta OS=Homo sapiens OX=9606 GN=CCT7 PE=1 SV=2	79	41	137	41	543	59.3	7.65	4190	102.3	103.2	103.7	95.4	98.5	96.9
Q9UJX4	ANAPC5	Anaphase-promoting complex subunit 5 OS=Homo sapiens OX=9606 GN=ANAPC5 PE=1 SV=2	7	5	5	5	755	85	6.87	80	102.2	95	102.6	103.6	97.7	98.9
Q8TBQ9	TMEM167A	Protein kish-A OS=Homo sapiens OX=9606 GN=TMEM167A PE=1 SV=1	13	1	1	1	72	8.1	8.95	37	86.1	89.7	89.3	116.9	110.4	107.5
P51991	HNRNPA3	Heterogeneous nuclear ribonucleoprotein A3 OS=Homo sapiens OX=9606 GN=HNRNPA3 PE=1 SV=2	44	21	51	17	378	39.6	9.01	982	99.6	102.5	106.8	95.1	98.8	97.2
Q99519	NEU1	Sialidase-1 OS=Homo sapiens OX=9606 GN=NEU1 PE=1 SV=1	10	4	4	4	415	45.4	5.88	29	95.3	88.5	92.3	113.1	105.4	105.4
Q16533	SNAPC1	snRNA-activating protein complex subunit 1 OS=Homo sapiens OX=9606 GN=SNAPC1 PE=1 SV=1	11	4	4	4	368	43	9.51	0	129.2	114.7	147.6	68.7	73.6	66.2
Q9P0V9	SEPTIN10	Septin-10 OS=Homo sapiens OX=9606 GN=SEPTIN10 PE=1 SV=2	25	9	13	8	454	52.6	6.8	299	95.6	97.3	98.6	105.8	102.4	100.2
Q9Y6D9	MAD1L1	Mitotic spindle assembly checkpoint protein MAD1 OS=Homo sapiens OX=9606 GN=MAD1L1 PE=1 SV=2	14	8	11	8	718	83	5.92	250	104.9	104.2	101.2	93.5	98	98.3
P28331	NDUFS1	NADH-ubiquinone oxidoreductase 75 kDa subunit, mitochondrial OS=Homo sapiens OX=9606 GN=NDUFS1 PE=1 SV=3	43	24	29	24	727	79.4	6.23	648	98.4	95.5	98.2	106.3	100.3	101.2
P09914	IFIT1	Interferon-induced protein with tetratricopeptide repeats 1 OS=Homo sapiens OX=9606 GN=IFIT1 PE=1 SV=2	10	4	5	4	478	55.3	7.2	115	86.8	92	88.8	118.5	105.6	108.3
Q5EBL4	RILPL1	RILP-like protein 1 OS=Homo sapiens OX=9606 GN=RILPL1 PE=1 SV=1	15	5	5	5	403	47.1	5.21	64	99.4	103.7	109.4	99	94.8	93.7
Q9Y605	MRFAP1	MORF4 family-associated protein 1 OS=Homo sapiens OX=9606 GN=MRFAP1 PE=1 SV=1	17	2	3	2	127	14.6	4.7	58	102.3	83.9	107.7	107.9	89.1	109
P16298	PPP3CB	Serine/threonine-protein phosphatase 2B catalytic subunit beta isoform OS=Homo sapiens OX=9606 GN=PPP3CB PE=1 SV=2	18	9	11	3	524	59	5.91	151	96	91.6	91.7	107.7	104.8	108.1
Q9H6R0	DHX33	ATP-dependent RNA helicase DHX33 OS=Homo sapiens OX=9606 GN=DHX33 PE=1 SV=2	6	4	4	4	707	78.8	8.91	44	102.7	91.8	101.4	98.5	100.4	105.2
Q9BXK5	BCL2L13	Bcl-2-like protein 13 OS=Homo sapiens OX=9606 GN=BCL2L13 PE=1 SV=1	20	6	7	6	485	52.7	4.44	130	93.3	92	91.2	110.8	107.1	105.5
Q9UIS9	MBD1	Methyl-CpG-binding domain protein 1 OS=Homo sapiens OX=9606 GN=MBD1 PE=1 SV=2	8	3	4	3	605	66.6	9.04	138	96.5	98.1	101.4	105.9	99.2	98.9
O43432	EIF4G3	Eukaryotic translation initiation factor 4 gamma 3 OS=Homo sapiens OX=9606 GN=EIF4G3 PE=1 SV=2	11	17	28	10	1585	176.5	5.38	548	93.5	93.9	96.8	106.3	102.6	106.9
Q9Y2Z4	YARS2	Tyrosine--tRNA ligase, mitochondrial OS=Homo sapiens OX=9606 GN=YARS2 PE=1 SV=2	21	7	9	7	477	53.2	8.98	185	104.2	101.4	107.3	95.3	94	97.9
P61201	COPS2	COP9 signalosome complex subunit 2 OS=Homo sapiens OX=9606 GN=COPS2 PE=1 SV=1	35	13	20	13	443	51.6	5.53	427	96.7	100.8	98.5	101.9	101.8	100.4
Q9Y230	RUVBL2	RuvB-like 2 OS=Homo sapiens OX=9606 GN=RUVBL2 PE=1 SV=3	68	28	49	28	463	51.1	5.64	1124	101.5	99.3	98.6	99.6	100.8	100.2
P38935	IGHMBP2	DNA-binding protein SMUBP-2 OS=Homo sapiens OX=9606 GN=IGHMBP2 PE=1 SV=3	9	8	9	8	993	109.1	8.97	174	99.6	99.1	107.8	94.5	98.7	100.4
O14974	PPP1R12A	Protein phosphatase 1 regulatory subunit 12A OS=Homo sapiens OX=9606 GN=PPP1R12A PE=1 SV=1	33	33	49	33	1030	115.2	5.4	992	101.7	100.9	103.7	97.6	97.4	98.7
Q96ME7	ZNF512	Zinc finger protein 512 OS=Homo sapiens OX=9606 GN=ZNF512 PE=1 SV=2	12	5	5	5	567	64.6	9.76	117	94.2	97.7	97.6	106.1	100.1	104.2
Q8WYB5	KAT6B	Histone acetyltransferase KAT6B OS=Homo sapiens OX=9606 GN=KAT6B PE=1 SV=3	1	3	3	1	2073	231.2	5.96	38	107.5	98	110.4	94.6	92	97.4
Q15067	ACOX1	Peroxisomal acyl-coenzyme A oxidase 1 OS=Homo sapiens OX=9606 GN=ACOX1 PE=1 SV=3	16	6	7	6	660	74.4	8.16	304	88.9	90.4	89.9	116.1	108.3	106.3
Q5HYI7	MTX3	Metaxin-3 OS=Homo sapiens OX=9606 GN=MTX3 PE=1 SV=2	16	5	6	5	312	35.1	7.8	111	98.6	94	97.2	104.9	102.2	103.1
Q9H223	EHD4	EH domain-containing protein 4 OS=Homo sapiens OX=9606 GN=EHD4 PE=1 SV=1	46	20	27	16	541	61.1	6.76	522	98.5	103.4	109.2	94.8	96.7	97.4
Q96GA3	LTV1	Protein LTV1 homolog OS=Homo sapiens OX=9606 GN=LTV1 PE=1 SV=1	5	2	2	2	475	54.8	4.91	0	107.5	102.6	109.6	96.7	86.7	96.9
Q9NRZ5	AGPAT4	1-acyl-sn-glycerol-3-phosphate acyltransferase delta OS=Homo sapiens OX=9606 GN=AGPAT4 PE=1 SV=1	2	1	2	1	378	44	8.72	0	101.1	107.8	98.1	94.9	91.5	106.7
O43570	CA12	Carbonic anhydrase 12 OS=Homo sapiens OX=9606 GN=CA12 PE=1 SV=1	12	3	3	3	354	39.4	7.23	67	101.8	113.5	102.8	89.9	89.5	102.5
Q9UH92	MLX	Max-like protein X OS=Homo sapiens OX=9606 GN=MLX PE=1 SV=2	3	1	1	1	298	33.3	8.06	23	93.9	92.5	102.1	116.2	94.5	100.9
Q96DZ1	ERLEC1	Endoplasmic reticulum lectin 1 OS=Homo sapiens OX=9606 GN=ERLEC1 PE=1 SV=1	22	8	9	7	483	54.8	6.28	153	96.7	93.4	97.9	103.7	101.7	106.6
Q9UKV5	AMFR	E3 ubiquitin-protein ligase AMFR OS=Homo sapiens OX=9606 GN=AMFR PE=1 SV=2	2	1	1	1	643	72.9	6.39	24	94.2	104.4	99.2	102.4	98	101.8
Q9UKG1	APPL1	DCC-interacting protein 13-alpha OS=Homo sapiens OX=9606 GN=APPL1 PE=1 SV=1	16	9	9	8	709	79.6	5.41	194	94.2	93.7	94.3	106.9	105.7	105.3
Q96JN8	NEURL4	Neuralized-like protein 4 OS=Homo sapiens OX=9606 GN=NEURL4 PE=1 SV=2	1	1	1	1	1562	166.8	5.86	0	103.3	94.4	100.9	100.6	93.7	107.1
A5A3E0	POTEF	POTE ankyrin domain family member F OS=Homo sapiens OX=9606 GN=POTEF PE=1 SV=2	12	9	89	2	1075	121.4	6.2	1908	98.7	99.4	99.3	102.6	101.1	98.9
Q9NWV4	CZIB	CXXC motif containing zinc binding protein OS=Homo sapiens OX=9606 GN=CZIB PE=1 SV=1	76	8	10	8	160	18	5.01	258	100.3	100.9	96.7	102.2	100.5	99.4
P53801	PTTG1IP	Pituitary tumor-transforming gene 1 protein-interacting protein OS=Homo sapiens OX=9606 GN=PTTG1IP PE=1 SV=1	14	2	6	2	180	20.3	8.79	168	89.1	89.7	101	112.6	107.9	99.7
Q01196	RUNX1	Runt-related transcription factor 1 OS=Homo sapiens OX=9606 GN=RUNX1 PE=1 SV=3	3	2	2	2	453	48.7	9.35	18	103.9	106	106.5	96.9	90.8	95.9
Q9Y6N5	SQOR	Sulfide:quinone oxidoreductase, mitochondrial OS=Homo sapiens OX=9606 GN=SQOR PE=1 SV=1	44	18	22	18	450	49.9	9.11	316	92.3	94.1	87.6	109.3	108.8	107.9
Q9Y680	FKBP7	Peptidyl-prolyl cis-trans isomerase FKBP7 OS=Homo sapiens OX=9606 GN=FKBP7 PE=1 SV=2	7	1	1	1	222	25.8	6.32	0	99.5	92.3	92.8	110.8	96.9	107.7
A6NKD9	CCDC85C	Coiled-coil domain-containing protein 85C OS=Homo sapiens OX=9606 GN=CCDC85C PE=1 SV=1	17	5	5	5	419	45.2	6.96	33	96.6	94.9	100.2	101.4	101.2	105.7
Q13347	EIF3I	Eukaryotic translation initiation factor 3 subunit I OS=Homo sapiens OX=9606 GN=EIF3I PE=1 SV=1	82	18	37	18	325	36.5	5.64	800	101.5	99.7	104	96	100	98.7
Q9BX10	GTPBP2	GTP-binding protein 2 OS=Homo sapiens OX=9606 GN=GTPBP2 PE=1 SV=1	1	1	1	1	602	65.7	8.05	0
Q7KZ85	SUPT6H	Transcription elongation factor SPT6 OS=Homo sapiens OX=9606 GN=SUPT6H PE=1 SV=2	12	15	19	15	1726	198.9	4.91	394	101.2	97.3	107.9	97.3	91.9	104.4
Q8IYQ7	THNSL1	Threonine synthase-like 1 OS=Homo sapiens OX=9606 GN=THNSL1 PE=1 SV=2	10	5	5	5	743	83	7.12	112	96.7	97.1	90.2	98.6	94.7	122.6
P15408	FOSL2	Fos-related antigen 2 OS=Homo sapiens OX=9606 GN=FOSL2 PE=1 SV=1	9	2	2	2	326	35.2	7.49	83	93.2	92.1	95.1	110.2	103.8	105.6
Q14517	FAT1	Protocadherin Fat 1 OS=Homo sapiens OX=9606 GN=FAT1 PE=1 SV=2	1	2	2	2	4588	506	5	40	85.9	98.9	101.5	105.2	96.7	111.9
Q8TED9	AFAP1L1	Actin filament-associated protein 1-like 1 OS=Homo sapiens OX=9606 GN=AFAP1L1 PE=1 SV=2	7	3	3	3	768	86.4	6.8	109	97.8	99.2	98	100.2	102.7	102.1
A6NHL2	TUBAL3	Tubulin alpha chain-like 3 OS=Homo sapiens OX=9606 GN=TUBAL3 PE=1 SV=2	10	5	22	1	446	49.9	6.05	230	106.4	129.2	104.3	84.9	92.5	82.7
Q14061	COX17	Cytochrome c oxidase copper chaperone OS=Homo sapiens OX=9606 GN=COX17 PE=1 SV=2	11	1	1	1	63	6.9	7.24	19	84.8	78.7	82.8	126.7	114.7	112.3
Q15262	PTPRK	Receptor-type tyrosine-protein phosphatase kappa OS=Homo sapiens OX=9606 GN=PTPRK PE=1 SV=2	2	2	2	1	1439	162	5.9	20	104.7	99.4	103.3	103.6	90.2	98.8
Q6ZMI0	PPP1R21	Protein phosphatase 1 regulatory subunit 21 OS=Homo sapiens OX=9606 GN=PPP1R21 PE=1 SV=1	14	8	9	8	780	88.3	6.84	210	91.8	98.2	96.8	105.3	101.9	105.9
Q9HAB8	PPCS	Phosphopantothenate--cysteine ligase OS=Homo sapiens OX=9606 GN=PPCS PE=1 SV=2	22	6	8	6	311	34	6.71	172	97.8	90.9	91.9	110.5	105.7	103.1
Q9Y5B8	NME7	Nucleoside diphosphate kinase 7 OS=Homo sapiens OX=9606 GN=NME7 PE=1 SV=1	31	10	15	10	376	42.5	6.47	250	100.7	97.1	102.4	100.5	100	99.3
A0A0B4J2A2	PPIAL4C	Peptidyl-prolyl cis-trans isomerase A-like 4C OS=Homo sapiens OX=9606 GN=PPIAL4C PE=2 SV=1	25	3	13	1	164	18.1	9.22	69
Q9H7D0	DOCK5	Dedicator of cytokinesis protein 5 OS=Homo sapiens OX=9606 GN=DOCK5 PE=1 SV=3	7	14	18	12	1870	215.2	7.96	195	97.4	98.7	98	101.7	100.3	103.9
P52435	POLR2J	DNA-directed RNA polymerase II subunit RPB11-a OS=Homo sapiens OX=9606 GN=POLR2J PE=1 SV=1	39	4	6	4	117	13.3	5.86	131	98.4	94	106.3	108.6	92.8	100.1
Q96P16	RPRD1A	Regulation of nuclear pre-mRNA domain-containing protein 1A OS=Homo sapiens OX=9606 GN=RPRD1A PE=1 SV=1	25	7	11	6	312	35.7	7.55	299	99.4	100.5	103.4	98.1	98.2	100.5
Q16775	HAGH	Hydroxyacylglutathione hydrolase, mitochondrial OS=Homo sapiens OX=9606 GN=HAGH PE=1 SV=2	20	5	6	5	308	33.8	8.12	98	96.8	104.8	97.5	98.8	97.7	104.5
P35270	SPR	Sepiapterin reductase OS=Homo sapiens OX=9606 GN=SPR PE=1 SV=1	58	12	19	12	261	28	8.05	564	103.5	108.1	102.1	96.3	95.4	94.6
Q8NE71	ABCF1	ATP-binding cassette sub-family F member 1 OS=Homo sapiens OX=9606 GN=ABCF1 PE=1 SV=2	42	28	40	28	845	95.9	6.8	986	103.1	101.6	101.5	98.1	98.1	97.7
Q9NVG8	TBC1D13	TBC1 domain family member 13 OS=Homo sapiens OX=9606 GN=TBC1D13 PE=1 SV=3	42	14	17	14	400	46.5	5.24	278	94.3	96.5	94.3	107.5	104.7	102.7
P16220	CREB1	Cyclic AMP-responsive element-binding protein 1 OS=Homo sapiens OX=9606 GN=CREB1 PE=1 SV=2	17	4	4	2	341	36.7	5.57	82	98.3	105.7	94.1	100.2	91.7	110
P19387	POLR2C	DNA-directed RNA polymerase II subunit RPB3 OS=Homo sapiens OX=9606 GN=POLR2C PE=1 SV=2	20	4	5	4	275	31.4	4.92	157	101.5	98	105.5	104.2	87.8	103.1
O75976	CPD	Carboxypeptidase D OS=Homo sapiens OX=9606 GN=CPD PE=1 SV=2	14	15	17	15	1380	152.8	6.05	374	83.9	82.4	88.6	130.4	106.8	107.9
Q9H9L3	ISG20L2	Interferon-stimulated 20 kDa exonuclease-like 2 OS=Homo sapiens OX=9606 GN=ISG20L2 PE=1 SV=1	4	1	1	1	353	39.1	9.94	27	94.8	103.5	106.4	96.6	90.7	108
O15182	CETN3	Centrin-3 OS=Homo sapiens OX=9606 GN=CETN3 PE=1 SV=2	43	5	5	5	167	19.5	4.74	94	105	96.2	108.7	97	97.6	95.6
P63165	SUMO1	Small ubiquitin-related modifier 1 OS=Homo sapiens OX=9606 GN=SUMO1 PE=1 SV=1	48	5	9	5	101	11.6	5.52	54	100	100	98	102.9	101.8	97.3
Q53GS9	USP39	U4/U6.U5 tri-snRNP-associated protein 2 OS=Homo sapiens OX=9606 GN=USP39 PE=1 SV=2	31	14	22	14	565	65.3	8.91	523	99.6	104.7	105.7	95.5	98.1	96.4
Q96EL2	MRPS24	28S ribosomal protein S24, mitochondrial OS=Homo sapiens OX=9606 GN=MRPS24 PE=1 SV=1	13	2	2	2	167	19	9.38	42	105.2	96.7	98.7	101.3	99.4	98.7
P28347	TEAD1	Transcriptional enhancer factor TEF-1 OS=Homo sapiens OX=9606 GN=TEAD1 PE=1 SV=2	9	5	5	2	426	47.9	8.15	95	108.4	121.4	115.4	83.8	89.7	81.3
Q99543	DNAJC2	DnaJ homolog subfamily C member 2 OS=Homo sapiens OX=9606 GN=DNAJC2 PE=1 SV=4	10	5	5	5	621	72	8.7	64	111.3	112.9	111.2	85.2	89.2	90.2
P42892	ECE1	Endothelin-converting enzyme 1 OS=Homo sapiens OX=9606 GN=ECE1 PE=1 SV=2	25	14	17	14	770	87.1	5.88	420	98.1	96.2	97.2	108.5	99.3	100.7
Q9UDX5	MTFP1	Mitochondrial fission process protein 1 OS=Homo sapiens OX=9606 GN=MTFP1 PE=1 SV=1	30	4	4	4	166	18	9.31	80	107.2	93.4	102.1	100.2	95.3	101.7
P27449	ATP6V0C	V-type proton ATPase 16 kDa proteolipid subunit OS=Homo sapiens OX=9606 GN=ATP6V0C PE=1 SV=1	12	1	2	1	155	15.7	8.44	0	97.5	98.7	96.9	101.4	100.5	105
O15260	SURF4	Surfeit locus protein 4 OS=Homo sapiens OX=9606 GN=SURF4 PE=1 SV=3	22	5	12	5	269	30.4	7.78	397	99.4	102	100.9	97.9	99.9	100
P52298	NCBP2	Nuclear cap-binding protein subunit 2 OS=Homo sapiens OX=9606 GN=NCBP2 PE=1 SV=1	28	5	7	5	156	18	8.21	84	101.6	101.1	106.2	96.8	95.4	98.9
Q96AX1	VPS33A	Vacuolar protein sorting-associated protein 33A OS=Homo sapiens OX=9606 GN=VPS33A PE=1 SV=1	18	9	10	9	596	67.6	6.96	286	98.4	96.4	100.2	103.5	99.5	101.9
Q9P2R6	RERE	Arginine-glutamic acid dipeptide repeats protein OS=Homo sapiens OX=9606 GN=RERE PE=1 SV=2	1	1	1	1	1566	172.3	7.69	0
Q2M389	WASHC4	WASH complex subunit 4 OS=Homo sapiens OX=9606 GN=WASHC4 PE=1 SV=2	10	11	14	11	1173	136.3	7.44	278	93.3	94.1	98.9	100.1	103.9	109.7
Q96MW5	COG8	Conserved oligomeric Golgi complex subunit 8 OS=Homo sapiens OX=9606 GN=COG8 PE=1 SV=2	5	3	3	3	612	68.4	5.2	37	93.5	91.3	110	115	96.6	93.5
O75348	ATP6V1G1	V-type proton ATPase subunit G 1 OS=Homo sapiens OX=9606 GN=ATP6V1G1 PE=1 SV=3	73	7	11	7	118	13.7	8.79	186	94.7	98.5	96.4	101.9	104.2	104.4
P17980	PSMC3	26S proteasome regulatory subunit 6A OS=Homo sapiens OX=9606 GN=PSMC3 PE=1 SV=3	65	26	45	26	439	49.2	5.24	989	101.3	103.3	101.4	96.4	99.7	98
Q9NZ45	CISD1	CDGSH iron-sulfur domain-containing protein 1 OS=Homo sapiens OX=9606 GN=CISD1 PE=1 SV=1	44	5	7	5	108	12.2	9.09	190	89.6	95.5	85.5	116.2	106.1	107.1
Q9UJX2	CDC23	Cell division cycle protein 23 homolog OS=Homo sapiens OX=9606 GN=CDC23 PE=1 SV=3	19	8	11	8	597	68.8	7.02	254	99.9	100.6	101.2	101.5	101.8	95
Q8N5I2	ARRDC1	Arrestin domain-containing protein 1 OS=Homo sapiens OX=9606 GN=ARRDC1 PE=1 SV=1	6	2	2	2	433	46	7.02	35	92.1	95.5	95.9	104.8	100.6	111
O95416	SOX14	Transcription factor SOX-14 OS=Homo sapiens OX=9606 GN=SOX14 PE=1 SV=1	3	1	1	1	240	26.5	9.67	0	101.5	107.5	93.5	96.8	105.4	95.2
Q9NXE4	SMPD4	Sphingomyelin phosphodiesterase 4 OS=Homo sapiens OX=9606 GN=SMPD4 PE=1 SV=3	13	9	10	9	866	97.7	8.27	204	101.4	101.3	100.2	99.6	97	100.6
P35914	HMGCL	Hydroxymethylglutaryl-CoA lyase, mitochondrial OS=Homo sapiens OX=9606 GN=HMGCL PE=1 SV=2	42	11	17	11	325	34.3	8.54	383	92.6	95.5	87.1	112	106.7	106
Q5SRE7	PHYHD1	Phytanoyl-CoA dioxygenase domain-containing protein 1 OS=Homo sapiens OX=9606 GN=PHYHD1 PE=1 SV=2	19	4	4	4	291	32.4	6.32	132	96.9	98.7	94.4	104.8	102.3	103
Q96BW5	PTER	Phosphotriesterase-related protein OS=Homo sapiens OX=9606 GN=PTER PE=1 SV=1	21	6	9	6	349	39	6.52	236	97.3	96.2	93.6	106.1	104.4	102.4
Q8IUE6	HIST2H2AB	Histone H2A type 2-B OS=Homo sapiens OX=9606 GN=HIST2H2AB PE=1 SV=3	25	4	16	2	130	14	10.89	150	108.4	131.7	110.3	78.9	88.6	82.2
O95292	VAPB	Vesicle-associated membrane protein-associated protein B/C OS=Homo sapiens OX=9606 GN=VAPB PE=1 SV=3	60	14	26	13	243	27.2	7.3	412	94	92.4	91.3	109.1	108.3	104.9
Q3V5L5	MGAT5B	Alpha-1,6-mannosylglycoprotein 6-beta-N-acetylglucosaminyltransferase B OS=Homo sapiens OX=9606 GN=MGAT5B PE=1 SV=2	1	1	1	1	792	89.5	8.35	0
Q9NR30	DDX21	Nucleolar RNA helicase 2 OS=Homo sapiens OX=9606 GN=DDX21 PE=1 SV=5	49	33	65	30	783	87.3	9.28	1490	117.8	104.1	119.1	84	87	88
O43181	NDUFS4	NADH dehydrogenase [ubiquinone] iron-sulfur protein 4, mitochondrial OS=Homo sapiens OX=9606 GN=NDUFS4 PE=1 SV=1	21	3	4	3	175	20.1	10.3	141	99.9	103.5	102	103.1	96.5	95.1
P02765	AHSG	Alpha-2-HS-glycoprotein OS=Homo sapiens OX=9606 GN=AHSG PE=1 SV=2	5	2	8	2	367	39.3	5.72	118	83.4	95.4	79.9	92.9	157.9	90.6
Q9Y5N5	N6AMT1	Methyltransferase N6AMT1 OS=Homo sapiens OX=9606 GN=N6AMT1 PE=1 SV=4	15	3	3	3	214	22.9	5.11	56	99.9	97.7	100.2	102.1	98.3	101.9
O00571	DDX3X	ATP-dependent RNA helicase DDX3X OS=Homo sapiens OX=9606 GN=DDX3X PE=1 SV=3	61	33	59	32	662	73.2	7.18	1294	105.5	98.8	108.8	97.6	94.8	94.5
Q8TAF3	WDR48	WD repeat-containing protein 48 OS=Homo sapiens OX=9606 GN=WDR48 PE=1 SV=1	9	5	5	5	677	76.2	7.03	146	98.4	94.6	96.9	107.9	101.9	100.3
Q9UMR5	PPT2	Lysosomal thioesterase PPT2 OS=Homo sapiens OX=9606 GN=PPT2 PE=1 SV=4	4	1	1	1	302	34.2	6.33	28	96.5	100.5	91	107	98.7	106.4
O96013	PAK4	Serine/threonine-protein kinase PAK 4 OS=Homo sapiens OX=9606 GN=PAK4 PE=1 SV=1	14	6	7	6	591	64	9.73	148	98.4	97.9	98.3	102.8	99	103.6
P04183	TK1	Thymidine kinase, cytosolic OS=Homo sapiens OX=9606 GN=TK1 PE=1 SV=2	26	6	8	6	234	25.5	8.51	146	92.3	98.4	101.1	106.9	98.3	102.9
P08865	RPSA	40S ribosomal protein SA OS=Homo sapiens OX=9606 GN=RPSA PE=1 SV=4	47	13	45	13	295	32.8	4.87	1054	101.6	102.4	99.8	100	101.1	95.1
Q8WVI0	SMIM4	Small integral membrane protein 4 OS=Homo sapiens OX=9606 GN=SMIM4 PE=1 SV=2	16	1	1	1	70	8.7	10.87	0	91.2	88.8	96.3	115.7	101.3	106.7
Q8N490	PNKD	Probable hydrolase PNKD OS=Homo sapiens OX=9606 GN=PNKD PE=1 SV=2	2	1	1	1	385	42.8	9.09	33	92.8	98.4	94.3	103.9	104.8	105.8
Q96I15	SCLY	Selenocysteine lyase OS=Homo sapiens OX=9606 GN=SCLY PE=1 SV=4	13	4	5	4	445	48.1	7.12	132	107.1	100.8	101	99.7	94.3	97.1
P54278	PMS2	Mismatch repair endonuclease PMS2 OS=Homo sapiens OX=9606 GN=PMS2 PE=1 SV=2	4	2	2	2	862	95.7	6.86	88	101.5	98.7	102.4	98	97.8	101.6
Q6XQN6	NAPRT	Nicotinate phosphoribosyltransferase OS=Homo sapiens OX=9606 GN=NAPRT PE=1 SV=2	14	5	7	5	538	57.5	5.68	160	104.9	106	102.2	92.2	98.5	96.1
P18031	PTPN1	Tyrosine-protein phosphatase non-receptor type 1 OS=Homo sapiens OX=9606 GN=PTPN1 PE=1 SV=1	56	22	39	22	435	49.9	6.27	755	98.1	98.8	97.9	102.5	102.7	100.1
P82914	MRPS15	28S ribosomal protein S15, mitochondrial OS=Homo sapiens OX=9606 GN=MRPS15 PE=1 SV=1	25	7	8	7	257	29.8	10.48	83	98.3	93.2	94.1	107.4	101.9	105.2
P30085	CMPK1	UMP-CMP kinase OS=Homo sapiens OX=9606 GN=CMPK1 PE=1 SV=3	62	11	19	11	196	22.2	5.57	604	92.9	100.5	93.8	105.6	106.2	100.9
Q9BTX3	TMEM208	Transmembrane protein 208 OS=Homo sapiens OX=9606 GN=TMEM208 PE=1 SV=1	16	1	1	1	173	19.6	9.26	37	90.6	97.4	89.4	98.5	112.1	112
A3KMH1	VWA8	von Willebrand factor A domain-containing protein 8 OS=Homo sapiens OX=9606 GN=VWA8 PE=1 SV=2	4	5	5	5	1905	214.7	7.4	64	95.2	85.6	102.8	108.5	96.2	111.7
Q5D0E6	DALRD3	DALR anticodon-binding domain-containing protein 3 OS=Homo sapiens OX=9606 GN=DALRD3 PE=1 SV=2	3	2	2	2	543	59.3	7.42	43	92.9	92.4	95.1	98.2	101.3	120.2
O60264	SMARCA5	SWI/SNF-related matrix-associated actin-dependent regulator of chromatin subfamily A member 5 OS=Homo sapiens OX=9606 GN=SMARCA5 PE=1 SV=1	35	35	42	28	1052	121.8	8.09	790	104.7	99.9	103.9	98.3	96.3	96.9
O43684	BUB3	Mitotic checkpoint protein BUB3 OS=Homo sapiens OX=9606 GN=BUB3 PE=1 SV=1	44	14	21	14	328	37.1	6.84	531	105	100.5	107.1	94.8	96.3	96.4
P78539	SRPX	Sushi repeat-containing protein SRPX OS=Homo sapiens OX=9606 GN=SRPX PE=1 SV=1	13	5	6	5	464	51.5	8.66	104	102.1	93.4	89	107.1	104.8	103.7
Q9H0H5	RACGAP1	Rac GTPase-activating protein 1 OS=Homo sapiens OX=9606 GN=RACGAP1 PE=1 SV=1	31	14	18	14	632	71	8.88	268	107.2	105.1	110.6	92.6	89	95.5
Q92734	TFG	Protein TFG OS=Homo sapiens OX=9606 GN=TFG PE=1 SV=2	43	14	28	14	400	43.4	5.1	619	94.5	94.8	99.4	107	100.5	103.8
Q15035	TRAM2	Translocating chain-associated membrane protein 2 OS=Homo sapiens OX=9606 GN=TRAM2 PE=1 SV=1	12	4	6	4	370	43.3	9.22	90	118	95.9	97	97.3	96.5	95.2
Q9H1K0	RBSN	Rabenosyn-5 OS=Homo sapiens OX=9606 GN=RBSN PE=1 SV=2	4	3	4	3	784	88.8	5.5	81	100.7	98	100.5	103.4	97.1	100.4
Q8IZ83	ALDH16A1	Aldehyde dehydrogenase family 16 member A1 OS=Homo sapiens OX=9606 GN=ALDH16A1 PE=1 SV=2	15	10	11	10	802	85.1	6.79	264	96.2	101.4	103.4	96.2	100.2	102.6
P0DJI9	SAA2	Serum amyloid A-2 protein OS=Homo sapiens OX=9606 GN=SAA2 PE=1 SV=1	34	3	4	2	122	13.5	9.14	84	107.7	101.5	108.7	92.6	90.5	99
Q12888	TP53BP1	TP53-binding protein 1 OS=Homo sapiens OX=9606 GN=TP53BP1 PE=1 SV=2	11	16	18	16	1972	213.4	4.7	308	96.7	94.3	95	107.5	101.7	104.7
Q5W111	SPRYD7	SPRY domain-containing protein 7 OS=Homo sapiens OX=9606 GN=SPRYD7 PE=1 SV=2	31	5	5	5	196	21.7	6.7	109	93.4	93	100.2	105.2	99	109.2
O75954	TSPAN9	Tetraspanin-9 OS=Homo sapiens OX=9606 GN=TSPAN9 PE=1 SV=1	5	1	1	1	239	26.8	7.68	0
Q96HY7	DHTKD1	Probable 2-oxoglutarate dehydrogenase E1 component DHKTD1, mitochondrial OS=Homo sapiens OX=9606 GN=DHTKD1 PE=1 SV=2	8	4	4	4	919	103	6.93	93	97.5	99.6	93.4	100.4	102.2	106.9
Q06547	GABPB1	GA-binding protein subunit beta-1 OS=Homo sapiens OX=9606 GN=GABPB1 PE=1 SV=2	4	2	2	2	395	42.5	4.86	20	102.7	103.3	103.5	98.6	97	95
P28827	PTPRM	Receptor-type tyrosine-protein phosphatase mu OS=Homo sapiens OX=9606 GN=PTPRM PE=1 SV=2	8	10	10	9	1452	163.6	6.65	150	104.3	102.5	102.7	95	97.7	97.8
P07996	THBS1	Thrombospondin-1 OS=Homo sapiens OX=9606 GN=THBS1 PE=1 SV=2	26	25	33	24	1170	129.3	4.94	705	108.7	109	107.1	91.1	91.8	92.2
Q13043	STK4	Serine/threonine-protein kinase 4 OS=Homo sapiens OX=9606 GN=STK4 PE=1 SV=2	37	16	19	11	487	55.6	5.07	387	105.3	106.3	106.2	94.4	94.2	93.7
P04062	GBA	Lysosomal acid glucosylceramidase OS=Homo sapiens OX=9606 GN=GBA PE=1 SV=3	20	9	10	9	536	59.7	7.61	202	96.2	95.1	94.4	110.7	99.2	104.3
Q8TAF5	FLVCR1-DT	Putative uncharacterized protein LQK1 OS=Homo sapiens OX=9606 GN=FLVCR1-DT PE=5 SV=1	13	1	1	1	88	10	11.37	0	98.9	90.1	100.8	100.1	101.3	108.9
Q9H0U3	MAGT1	Magnesium transporter protein 1 OS=Homo sapiens OX=9606 GN=MAGT1 PE=1 SV=1	17	6	8	5	335	38	9.63	158	97.7	94.7	96	108.3	101.2	102.1
Q5VWZ2	LYPLAL1	Lysophospholipase-like protein 1 OS=Homo sapiens OX=9606 GN=LYPLAL1 PE=1 SV=3	25	5	6	5	237	26.3	7.84	122	99.7	100	94.8	104.6	99	101.9
P55199	ELL	RNA polymerase II elongation factor ELL OS=Homo sapiens OX=9606 GN=ELL PE=1 SV=1	3	2	2	2	621	68.2	9.33	18	103.3	103.4	110.6	95.8	83.3	103.6
Q8IUC6	TICAM1	TIR domain-containing adapter molecule 1 OS=Homo sapiens OX=9606 GN=TICAM1 PE=1 SV=1	1	1	1	1	712	76.4	5.41	0	97.7	94.7	96.9	107.7	99.4	103.6
Q71UM5	RPS27L	40S ribosomal protein S27-like OS=Homo sapiens OX=9606 GN=RPS27L PE=1 SV=3	29	2	7	1	84	9.5	9.45	225	102.1	92.1	95.6	100.7	106.1	103.4
P26572	MGAT1	Alpha-1,3-mannosyl-glycoprotein 2-beta-N-acetylglucosaminyltransferase OS=Homo sapiens OX=9606 GN=MGAT1 PE=1 SV=2	2	1	1	1	445	50.8	9.16	22
Q6WKZ4	RAB11FIP1	Rab11 family-interacting protein 1 OS=Homo sapiens OX=9606 GN=RAB11FIP1 PE=1 SV=3	11	12	13	12	1283	137.1	5.43	257	92.6	92	92.3	109.5	106.4	107.3
Q3LXA3	TKFC	Triokinase/FMN cyclase OS=Homo sapiens OX=9606 GN=TKFC PE=1 SV=2	11	5	5	5	575	58.9	7.49	86	105	98.1	94.3	103.5	97.6	101.6
Q9H410	DSN1	Kinetochore-associated protein DSN1 homolog OS=Homo sapiens OX=9606 GN=DSN1 PE=1 SV=2	14	5	5	5	356	40	7.05	79	98.2	99.3	100.2	98.8	99	104.5
P13667	PDIA4	Protein disulfide-isomerase A4 OS=Homo sapiens OX=9606 GN=PDIA4 PE=1 SV=2	63	42	122	42	645	72.9	5.07	3132	91.7	94.7	94.4	107.2	108.8	103.2
P18669	PGAM1	Phosphoglycerate mutase 1 OS=Homo sapiens OX=9606 GN=PGAM1 PE=1 SV=2	73	17	91	17	254	28.8	7.18	2128	98.8	103.9	98.9	99.4	100.1	99
Q13753	LAMC2	Laminin subunit gamma-2 OS=Homo sapiens OX=9606 GN=LAMC2 PE=1 SV=2	3	3	3	3	1193	130.9	6.19	29	93.6	88.3	89.2	113.5	110.3	105.1
Q9Y4H2	IRS2	Insulin receptor substrate 2 OS=Homo sapiens OX=9606 GN=IRS2 PE=1 SV=2	6	6	7	6	1338	137.2	8.65	60	105.5	100.4	104.4	94.4	92.9	102.4
Q8N6M0	OTUD6B	Deubiquitinase OTUD6B OS=Homo sapiens OX=9606 GN=OTUD6B PE=1 SV=1	20	5	6	5	293	33.8	6.05	124	97.9	99.3	101.1	100.7	97.8	103.2
Q03519	TAP2	Antigen peptide transporter 2 OS=Homo sapiens OX=9606 GN=TAP2 PE=1 SV=1	17	10	11	9	686	75.6	8.02	157	91.1	90.5	88.4	112.4	110.1	107.6
P41208	CETN2	Centrin-2 OS=Homo sapiens OX=9606 GN=CETN2 PE=1 SV=1	30	4	5	4	172	19.7	5	113	95.8	98.9	103	101.4	101.6	99.3
Q8NBM4	UBAC2	Ubiquitin-associated domain-containing protein 2 OS=Homo sapiens OX=9606 GN=UBAC2 PE=1 SV=1	19	5	6	5	344	38.9	9.01	123	101.7	98.6	102	102.4	96.1	99.2
O94806	PRKD3	Serine/threonine-protein kinase D3 OS=Homo sapiens OX=9606 GN=PRKD3 PE=1 SV=1	3	2	2	1	890	100.4	6.87	64	99.6	102.7	102.2	103.5	96.7	95.4
O15347	HMGB3	High mobility group protein B3 OS=Homo sapiens OX=9606 GN=HMGB3 PE=1 SV=4	38	9	14	8	200	23	8.37	278	108	112.3	111.2	86.2	90.5	91.7
P51668	UBE2D1	Ubiquitin-conjugating enzyme E2 D1 OS=Homo sapiens OX=9606 GN=UBE2D1 PE=1 SV=1	7	1	2	1	147	16.6	7.42	74	97.2	99.3	99.4	101.2	99.8	103
Q14781	CBX2	Chromobox protein homolog 2 OS=Homo sapiens OX=9606 GN=CBX2 PE=1 SV=2	8	2	2	2	532	56	10.01	66	96.8	97.4	104.9	97.5	94.4	109
P63146	UBE2B	Ubiquitin-conjugating enzyme E2 B OS=Homo sapiens OX=9606 GN=UBE2B PE=1 SV=1	19	2	2	2	152	17.3	5.01	52	105.1	117.4	108.6	91.3	86.3	91.3
Q9NRZ9	HELLS	Lymphoid-specific helicase OS=Homo sapiens OX=9606 GN=HELLS PE=1 SV=1	3	2	2	2	838	97	7.93	23	115	99.2	121.9	94.8	81.4	87.8
Q13232	NME3	Nucleoside diphosphate kinase 3 OS=Homo sapiens OX=9606 GN=NME3 PE=1 SV=2	22	3	3	3	169	19	7.84	63	97.6	95.2	97.2	107.2	102.2	100.6
Q9BZD4	NUF2	Kinetochore protein Nuf2 OS=Homo sapiens OX=9606 GN=NUF2 PE=1 SV=2	17	8	10	8	464	54.3	8.27	185	102.6	94.9	102.1	105	96.6	98.8
P13798	APEH	Acylamino-acid-releasing enzyme OS=Homo sapiens OX=9606 GN=APEH PE=1 SV=4	38	20	28	20	732	81.2	5.48	652	95.9	99.2	96.3	101.5	104.5	102.6
Q96EY4	TMA16	Translation machinery-associated protein 16 OS=Homo sapiens OX=9606 GN=TMA16 PE=1 SV=2	17	3	3	3	203	23.8	9.26	78	113.2	107.3	106.4	92.8	87.2	93.1
P08697	SERPINF2	Alpha-2-antiplasmin OS=Homo sapiens OX=9606 GN=SERPINF2 PE=1 SV=3	2	1	1	1	491	54.5	6.29	42	94.9	95.3	89.9	101	122.9	95.9
Q9H0E3	SAP130	Histone deacetylase complex subunit SAP130 OS=Homo sapiens OX=9606 GN=SAP130 PE=1 SV=1	4	4	4	4	1048	110.3	9.83	65	102.5	96.9	103.9	102.4	95.2	99.1
P04066	FUCA1	Tissue alpha-L-fucosidase OS=Homo sapiens OX=9606 GN=FUCA1 PE=1 SV=4	14	5	5	5	466	53.7	6.84	79	95.8	97.7	86.9	118.4	98.9	102.3
Q9H2H9	SLC38A1	Sodium-coupled neutral amino acid transporter 1 OS=Homo sapiens OX=9606 GN=SLC38A1 PE=1 SV=1	6	3	4	3	487	54	7.02	76	103	96.6	104.1	97.9	98.8	99.6
O00625	PIR	Pirin OS=Homo sapiens OX=9606 GN=PIR PE=1 SV=1	17	4	4	4	290	32.1	6.92	49	99.9	101.1	104.3	99.3	96.5	98.8
Q8TAB3	PCDH19	Protocadherin-19 OS=Homo sapiens OX=9606 GN=PCDH19 PE=1 SV=3	1	1	1	1	1148	126.2	5.36	0	102.4	105.8	107.4	91.7	98.8	93.8
P43363	MAGEA10	Melanoma-associated antigen 10 OS=Homo sapiens OX=9606 GN=MAGEA10 PE=2 SV=2	2	1	1	1	369	40.8	4.4	31	112.1	102.7	102	103.3	93.8	86
Q9BZE4	GTPBP4	Nucleolar GTP-binding protein 1 OS=Homo sapiens OX=9606 GN=GTPBP4 PE=1 SV=3	43	23	34	23	634	73.9	9.5	577	108.6	97	116.6	95.1	91	91.7
Q9NQH7	XPNPEP3	Xaa-Pro aminopeptidase 3 OS=Homo sapiens OX=9606 GN=XPNPEP3 PE=1 SV=1	11	4	8	3	507	57	6.83	186	96	99.8	99.2	105.7	99.4	99.8
O15075	DCLK1	Serine/threonine-protein kinase DCLK1 OS=Homo sapiens OX=9606 GN=DCLK1 PE=1 SV=2	3	2	2	2	740	82.2	8.66	36	76.1	70.4	72.3	131.9	131.6	117.7
Q9BYN0	SRXN1	Sulfiredoxin-1 OS=Homo sapiens OX=9606 GN=SRXN1 PE=1 SV=2	15	2	2	2	137	14.3	8.19	54	104.8	98.6	107.4	100.1	90.1	99.1
Q96DI7	SNRNP40	U5 small nuclear ribonucleoprotein 40 kDa protein OS=Homo sapiens OX=9606 GN=SNRNP40 PE=1 SV=1	30	8	10	8	357	39.3	8.1	265	98.6	104.3	113	87.7	98.5	97.9
Q7L8L6	FASTKD5	FAST kinase domain-containing protein 5, mitochondrial OS=Homo sapiens OX=9606 GN=FASTKD5 PE=1 SV=1	14	9	9	9	764	86.5	8.13	134	108.6	96.6	107.1	101.9	92.1	93.7
Q9BV57	ADI1	1,2-dihydroxy-3-keto-5-methylthiopentene dioxygenase OS=Homo sapiens OX=9606 GN=ADI1 PE=1 SV=1	35	5	5	5	179	21.5	5.68	61	106.7	109.9	123.2	97.7	81.4	81
P14174	MIF	Macrophage migration inhibitory factor OS=Homo sapiens OX=9606 GN=MIF PE=1 SV=4	43	5	26	5	115	12.5	7.88	605	98.5	103.4	96.9	101.7	97.4	102
Q9BVS5	TRMT61B	tRNA (adenine(58)-N(1))-methyltransferase, mitochondrial OS=Homo sapiens OX=9606 GN=TRMT61B PE=1 SV=2	2	1	1	1	477	52.9	6.62	14
Q99459	CDC5L	Cell division cycle 5-like protein OS=Homo sapiens OX=9606 GN=CDC5L PE=1 SV=2	34	20	30	20	802	92.2	8.18	776	101.4	97.7	103	101	98.3	98.6
P43487	RANBP1	Ran-specific GTPase-activating protein OS=Homo sapiens OX=9606 GN=RANBP1 PE=1 SV=1	52	10	20	10	201	23.3	5.29	338	100.8	101.2	97.6	97.6	103.6	99.4
Q7Z4H8	POGLUT3	Protein O-glucosyltransferase 3 OS=Homo sapiens OX=9606 GN=POGLUT3 PE=1 SV=2	35	16	17	16	507	58.5	8.24	245	102.7	103.3	97.5	97.5	99.6	99.4
Q13315	ATM	Serine-protein kinase ATM OS=Homo sapiens OX=9606 GN=ATM PE=1 SV=4	2	6	6	6	3056	350.5	6.81	124	95.1	97.1	100.6	105.8	101.7	99.8
Q96TC7	RMDN3	Regulator of microtubule dynamics protein 3 OS=Homo sapiens OX=9606 GN=RMDN3 PE=1 SV=2	26	9	10	9	470	52.1	5.1	188	98.4	97.3	97.9	101.3	104.1	100.9
Q7Z4S6	KIF21A	Kinesin-like protein KIF21A OS=Homo sapiens OX=9606 GN=KIF21A PE=1 SV=2	7	7	7	6	1674	187.1	6.42	173	102.7	98	104.8	94.1	96.6	103.9
Q86UX6	STK32C	Serine/threonine-protein kinase 32C OS=Homo sapiens OX=9606 GN=STK32C PE=1 SV=1	4	1	1	1	486	55	6.61	0	103.8	106.6	108.6	91.8	90.4	98.7
O60784	TOM1	Target of Myb protein 1 OS=Homo sapiens OX=9606 GN=TOM1 PE=1 SV=2	30	9	11	9	492	53.8	4.7	320	94.2	92.2	94.5	112.4	102.4	104.2
P01116	KRAS	GTPase KRas OS=Homo sapiens OX=9606 GN=KRAS PE=1 SV=1	56	7	12	1	189	21.6	6.77	392
Q7Z2T5	TRMT1L	TRMT1-like protein OS=Homo sapiens OX=9606 GN=TRMT1L PE=1 SV=2	3	2	3	2	733	81.7	7.88	77	117.8	95.7	99	101.2	96.8	89.5
Q05086	UBE3A	Ubiquitin-protein ligase E3A OS=Homo sapiens OX=9606 GN=UBE3A PE=1 SV=4	16	11	13	11	875	100.6	5.22	318	101.5	101.5	104.9	94.8	94	103.3
Q9BV40	VAMP8	Vesicle-associated membrane protein 8 OS=Homo sapiens OX=9606 GN=VAMP8 PE=1 SV=1	41	5	7	5	100	11.4	7.34	135	94.1	95.3	92.5	106.2	102.8	109.1
P32019	INPP5B	Type II inositol 1,4,5-trisphosphate 5-phosphatase OS=Homo sapiens OX=9606 GN=INPP5B PE=1 SV=4	4	3	3	3	993	112.8	5.57	62	97.1	99.5	97.6	102.7	94.3	108.8
Q9BRZ2	TRIM56	E3 ubiquitin-protein ligase TRIM56 OS=Homo sapiens OX=9606 GN=TRIM56 PE=1 SV=3	19	9	12	9	755	81.4	7.74	237	99.8	94.9	99	100.6	102.4	103.2
Q7L5N1	COPS6	COP9 signalosome complex subunit 6 OS=Homo sapiens OX=9606 GN=COPS6 PE=1 SV=1	40	10	12	10	327	36.1	5.73	298	89.8	100.3	100.8	102.9	102.9	103.2
P62891	RPL39	60S ribosomal protein L39 OS=Homo sapiens OX=9606 GN=RPL39 PE=1 SV=2	20	1	1	1	51	6.4	12.56	0	112.1	105.9	112.4	75.8	88.1	105.7
Q6UW68	TMEM205	Transmembrane protein 205 OS=Homo sapiens OX=9606 GN=TMEM205 PE=1 SV=1	21	3	5	3	189	21.2	8.62	123	96	101.7	91.9	98.3	101.4	110.7
O15118	NPC1	NPC intracellular cholesterol transporter 1 OS=Homo sapiens OX=9606 GN=NPC1 PE=1 SV=2	10	11	14	11	1278	142.1	5.36	239	96.1	94.1	98.4	107	102.4	102
Q9BR61	ACBD6	Acyl-CoA-binding domain-containing protein 6 OS=Homo sapiens OX=9606 GN=ACBD6 PE=1 SV=1	24	6	6	6	282	31.1	5.11	118	96.1	94.4	96.4	107.1	101.1	104.8
Q5T1C6	THEM4	Acyl-coenzyme A thioesterase THEM4 OS=Homo sapiens OX=9606 GN=THEM4 PE=1 SV=1	5	1	1	1	240	27.1	8.28	15	100.4	102.7	90.6	99.8	105.5	101
Q9Y3M8	STARD13	StAR-related lipid transfer protein 13 OS=Homo sapiens OX=9606 GN=STARD13 PE=1 SV=2	4	4	4	4	1113	124.9	7.02	47	95.8	94.4	99.3	99.9	104.8	105.9
Q9NX18	SDHAF2	Succinate dehydrogenase assembly factor 2, mitochondrial OS=Homo sapiens OX=9606 GN=SDHAF2 PE=1 SV=1	12	2	2	2	166	19.6	6.8	33	104.4	111.7	111.1	83.1	96.3	93.3
Q5VST6	ABHD17B	Alpha/beta hydrolase domain-containing protein 17B OS=Homo sapiens OX=9606 GN=ABHD17B PE=1 SV=1	2	1	1	1	288	32.2	6.29	18	100.1	102	109.6	97.7	89.3	101.4
P00390	GSR	Glutathione reductase, mitochondrial OS=Homo sapiens OX=9606 GN=GSR PE=1 SV=2	38	13	16	13	522	56.2	8.5	474	104.9	107.6	104.5	94.8	93.9	94.3
P13674	P4HA1	Prolyl 4-hydroxylase subunit alpha-1 OS=Homo sapiens OX=9606 GN=P4HA1 PE=1 SV=2	46	21	33	21	534	61	6.01	1042	95.1	106.1	91.7	108.6	100.7	97.8
Q8IWE4	DCUN1D3	DCN1-like protein 3 OS=Homo sapiens OX=9606 GN=DCUN1D3 PE=1 SV=1	5	1	1	1	304	34.3	5.12	30	94.1	94.1	104.4	103.2	100.3	104
Q9H147	DNTTIP1	Deoxynucleotidyltransferase terminal-interacting protein 1 OS=Homo sapiens OX=9606 GN=DNTTIP1 PE=1 SV=2	7	3	3	3	329	37	8.97	35	104.9	108.4	105.6	94.8	91.6	94.7
Q15464	SHB	SH2 domain-containing adapter protein B OS=Homo sapiens OX=9606 GN=SHB PE=1 SV=2	3	2	2	2	509	55	8.9	30	101.9	99.9	100.3	98.9	99	99.9
O14562	UBFD1	Ubiquitin domain-containing protein UBFD1 OS=Homo sapiens OX=9606 GN=UBFD1 PE=1 SV=2	18	5	6	5	309	33.4	5.77	103	102.8	104.7	103	95.4	96.7	97.3
Q15393	SF3B3	Splicing factor 3B subunit 3 OS=Homo sapiens OX=9606 GN=SF3B3 PE=1 SV=4	43	37	68	37	1217	135.5	5.26	1716	102.1	100.7	101.8	96.9	98.4	100.1
P41227	NAA10	N-alpha-acetyltransferase 10 OS=Homo sapiens OX=9606 GN=NAA10 PE=1 SV=1	43	9	10	9	235	26.4	5.64	247	95	97.1	96.5	102.1	104.4	104.8
Q7Z7C8	TAF8	Transcription initiation factor TFIID subunit 8 OS=Homo sapiens OX=9606 GN=TAF8 PE=1 SV=1	3	1	1	1	310	34.2	6.46	0	103.4	104.6	104.4	93.2	92.4	102
Q8NBI6	XXYLT1	Xyloside xylosyltransferase 1 OS=Homo sapiens OX=9606 GN=XXYLT1 PE=1 SV=1	9	3	3	3	393	43.8	8.13	44
P05166	PCCB	Propionyl-CoA carboxylase beta chain, mitochondrial OS=Homo sapiens OX=9606 GN=PCCB PE=1 SV=3	6	2	2	2	539	58.2	7.64	77	100.6	109.5	114.3	80.5	97.3	97.8
Q5T5P2	KIAA1217	Sickle tail protein homolog OS=Homo sapiens OX=9606 GN=KIAA1217 PE=1 SV=2	6	9	9	9	1943	214	7.06	182	92.6	92.3	93.3	113.3	102.5	106.1
Q13636	RAB31	Ras-related protein Rab-31 OS=Homo sapiens OX=9606 GN=RAB31 PE=1 SV=1	20	3	6	2	194	21.6	7.06	133	107.4	110.6	105.7	91.1	90.2	95
Q96S94	CCNL2	Cyclin-L2 OS=Homo sapiens OX=9606 GN=CCNL2 PE=1 SV=1	4	1	1	1	520	58.1	10.26	69	94.5	107.1	95.1	98.9	93.2	111.2
L0R6Q1	SLC35A4	SLC35A4 upstream open reading frame protein OS=Homo sapiens OX=9606 GN=SLC35A4 PE=3 SV=1	40	3	4	3	103	11.1	8.1	112	94.6	84.2	87.1	122.6	106.9	104.5
Q9Y653	ADGRG1	Adhesion G-protein coupled receptor G1 OS=Homo sapiens OX=9606 GN=ADGRG1 PE=1 SV=2	1	1	1	1	693	77.7	8.48	37	81	83.6	67.7	141.2	115.4	111.2
Q8NHP6	MOSPD2	Motile sperm domain-containing protein 2 OS=Homo sapiens OX=9606 GN=MOSPD2 PE=1 SV=1	6	3	4	3	518	59.7	5.96	36	92.4	92.3	97	108	105.6	104.8
P54252	ATXN3	Ataxin-3 OS=Homo sapiens OX=9606 GN=ATXN3 PE=1 SV=5	11	3	3	3	361	41.2	4.78	74	92.8	90.3	96.2	109.6	104	107.2
Q9Y624	F11R	Junctional adhesion molecule A OS=Homo sapiens OX=9606 GN=F11R PE=1 SV=1	21	5	7	5	299	32.6	7.9	143	86.5	91.9	88.4	113.6	109.3	110.2
Q96S44	TP53RK	EKC/KEOPS complex subunit TP53RK OS=Homo sapiens OX=9606 GN=TP53RK PE=1 SV=2	10	3	4	3	253	28.1	9.54	90	106.3	99.4	100.8	96.9	94.6	102
P18847	ATF3	Cyclic AMP-dependent transcription factor ATF-3 OS=Homo sapiens OX=9606 GN=ATF3 PE=1 SV=2	19	2	2	2	181	20.6	8.54	0	100.8	115.2	104.1	78.7	102.5	98.9
P21964	COMT	Catechol O-methyltransferase OS=Homo sapiens OX=9606 GN=COMT PE=1 SV=2	63	13	21	13	271	30	5.47	400	95.9	93.9	93.2	108.1	105.5	103.3
Q8IWR0	ZC3H7A	Zinc finger CCCH domain-containing protein 7A OS=Homo sapiens OX=9606 GN=ZC3H7A PE=1 SV=1	3	2	2	2	971	110.5	7.3	13	94	91.6	95.6	112.4	96.3	110.1
Q7LG56	RRM2B	Ribonucleoside-diphosphate reductase subunit M2 B OS=Homo sapiens OX=9606 GN=RRM2B PE=1 SV=1	19	6	6	5	351	40.7	4.97	96	95.8	95.3	95.5	108	103.5	102
Q68DH5	LMBRD2	G-protein coupled receptor-associated protein LMBRD2 OS=Homo sapiens OX=9606 GN=LMBRD2 PE=1 SV=1	3	2	2	2	695	81.1	7.5	32	97.2	99.8	98.9	103	99.5	101.6
O75477	ERLIN1	Erlin-1 OS=Homo sapiens OX=9606 GN=ERLIN1 PE=1 SV=2	46	15	24	12	348	39.1	7.87	516	98.7	95.4	90.4	106.6	105.8	103
Q15836	VAMP3	Vesicle-associated membrane protein 3 OS=Homo sapiens OX=9606 GN=VAMP3 PE=1 SV=3	40	4	7	1	100	11.3	8.79	287	94.1	87.6	92.1	110.9	107.7	107.5
Q8WUF5	PPP1R13L	RelA-associated inhibitor OS=Homo sapiens OX=9606 GN=PPP1R13L PE=1 SV=4	29	19	20	19	828	89	6.81	348	95	91.6	95.5	106.7	103.1	108.1
P57081	WDR4	tRNA (guanine-N(7)-)-methyltransferase non-catalytic subunit WDR4 OS=Homo sapiens OX=9606 GN=WDR4 PE=1 SV=2	3	1	1	1	412	45.5	7.11	24	105.9	104.4	98.2	100.2	92.9	98.4
P26583	HMGB2	High mobility group protein B2 OS=Homo sapiens OX=9606 GN=HMGB2 PE=1 SV=2	52	13	33	11	209	24	7.81	400	103.9	109	101.7	93.4	98	94
Q9Y3Z3	SAMHD1	Deoxynucleoside triphosphate triphosphohydrolase SAMHD1 OS=Homo sapiens OX=9606 GN=SAMHD1 PE=1 SV=2	48	23	31	23	626	72.2	7.14	524	96	94.3	94.3	105.9	104.4	105.2
P49792	RANBP2	E3 SUMO-protein ligase RanBP2 OS=Homo sapiens OX=9606 GN=RANBP2 PE=1 SV=2	34	87	112	85	3224	358	6.2	2507	100.6	98.4	98.9	100	100.9	101.2
O75940	SMNDC1	Survival of motor neuron-related-splicing factor 30 OS=Homo sapiens OX=9606 GN=SMNDC1 PE=1 SV=1	30	6	8	6	238	26.7	7.24	194	98.4	96.6	105.7	97.2	102.1	99.9
P52799	EFNB2	Ephrin-B2 OS=Homo sapiens OX=9606 GN=EFNB2 PE=1 SV=1	3	1	1	1	333	36.9	8.85	41	89.7	95.3	90.8	112.2	108.4	103.6
Q8IXM6	NRM	Nurim OS=Homo sapiens OX=9606 GN=NRM PE=1 SV=1	13	3	3	3	262	29.4	8.63	20	108.1	115	100.5	90.4	93.8	92.3
P82675	MRPS5	28S ribosomal protein S5, mitochondrial OS=Homo sapiens OX=9606 GN=MRPS5 PE=1 SV=2	14	6	7	6	430	48	9.92	119	96.8	92.9	96.5	104.3	103.1	106.4
O95466	FMNL1	Formin-like protein 1 OS=Homo sapiens OX=9606 GN=FMNL1 PE=1 SV=3	23	23	30	21	1100	121.8	5.72	444	97	100.9	98.8	100.8	101	101.6
Q9NV31	IMP3	U3 small nucleolar ribonucleoprotein protein IMP3 OS=Homo sapiens OX=9606 GN=IMP3 PE=1 SV=1	27	4	5	4	184	21.8	9.5	66	113.7	110	113.2	89.4	83.6	90.1
Q96F44	TRIM11	E3 ubiquitin-protein ligase TRIM11 OS=Homo sapiens OX=9606 GN=TRIM11 PE=1 SV=2	4	2	2	2	468	52.7	5.69	21	103.7	107.3	101.7	97.8	91.9	97.6
Q6UW02	CYP20A1	Cytochrome P450 20A1 OS=Homo sapiens OX=9606 GN=CYP20A1 PE=1 SV=1	29	10	11	10	462	52.4	6.21	244	94	89.9	94.4	105.2	107.5	109
Q9BRX5	GINS3	DNA replication complex GINS protein PSF3 OS=Homo sapiens OX=9606 GN=GINS3 PE=1 SV=1	16	4	4	4	216	24.5	5.34	54	105.5	101.9	108	95.6	95.3	93.8
O75165	DNAJC13	DnaJ homolog subfamily C member 13 OS=Homo sapiens OX=9606 GN=DNAJC13 PE=1 SV=5	17	31	38	31	2243	254.3	6.74	797	98.7	101.2	97.1	101.9	100.3	100.8
Q9Y5N6	ORC6	Origin recognition complex subunit 6 OS=Homo sapiens OX=9606 GN=ORC6 PE=1 SV=1	11	2	2	2	252	28.1	8.66	39	101.6	102.8	109.3	93.4	91.1	101.9
Q02083	NAAA	N-acylethanolamine-hydrolyzing acid amidase OS=Homo sapiens OX=9606 GN=NAAA PE=1 SV=3	3	1	1	1	359	40	8.75	22	96.8	88.2	93.2	116.4	102.6	102.8
Q9Y6N6	LAMC3	Laminin subunit gamma-3 OS=Homo sapiens OX=9606 GN=LAMC3 PE=1 SV=3	1	1	1	1	1575	171.1	6.58	0	94.8	80.2	91.9	133	99.2	101
Q15542	TAF5	Transcription initiation factor TFIID subunit 5 OS=Homo sapiens OX=9606 GN=TAF5 PE=1 SV=3	2	1	1	1	800	86.8	5.64	0	98.6	95.3	101.1	102.1	101.3	101.6
Q14974	KPNB1	Importin subunit beta-1 OS=Homo sapiens OX=9606 GN=KPNB1 PE=1 SV=2	46	32	89	32	876	97.1	4.78	2202	94.8	96.9	98.3	101.4	105.1	103.5
Q9Y224	RTRAF	RNA transcription, translation and transport factor protein OS=Homo sapiens OX=9606 GN=RTRAF PE=1 SV=1	66	15	26	15	244	28.1	6.65	674	99.7	98.4	101	100	100.4	100.5
P19367	HK1	Hexokinase-1 OS=Homo sapiens OX=9606 GN=HK1 PE=1 SV=3	51	44	78	38	917	102.4	6.8	2161	97.5	97.3	93.6	103.9	105.2	102.5
Q9H0A8	COMMD4	COMM domain-containing protein 4 OS=Homo sapiens OX=9606 GN=COMMD4 PE=1 SV=1	29	5	8	5	199	21.8	7.31	160	95.6	95.2	98	105.8	103	102.5
Q9BYC5	FUT8	Alpha-(1,6)-fucosyltransferase OS=Homo sapiens OX=9606 GN=FUT8 PE=1 SV=2	13	5	6	5	575	66.5	7.66	65	101.6	103.2	91.7	105.1	97.7	100.7
P50991	CCT4	T-complex protein 1 subunit delta OS=Homo sapiens OX=9606 GN=CCT4 PE=1 SV=4	72	33	78	32	539	57.9	7.83	1913	104.1	104.6	103.6	93.9	97.4	96.3
Q15648	MED1	Mediator of RNA polymerase II transcription subunit 1 OS=Homo sapiens OX=9606 GN=MED1 PE=1 SV=4	4	6	7	6	1581	168.4	8.73	158	105.6	97.6	104.9	96.1	96.2	99.7
P36954	POLR2I	DNA-directed RNA polymerase II subunit RPB9 OS=Homo sapiens OX=9606 GN=POLR2I PE=1 SV=1	27	2	2	2	125	14.5	5.14	41	87.7	90	92.3	92.3	96.4	141.2
Q8TDH9	BLOC1S5	Biogenesis of lysosome-related organelles complex 1 subunit 5 OS=Homo sapiens OX=9606 GN=BLOC1S5 PE=1 SV=1	10	2	2	2	187	21.6	7.59	54	97.4	98.1	96	94.8	103	110.7
A8K0Z3	WASHC1	WASH complex subunit 1 OS=Homo sapiens OX=9606 GN=WASHC1 PE=1 SV=2	11	5	5	5	465	50.3	5.68	87	99.4	100.8	100.4	99.2	95.6	104.6
Q9Y343	SNX24	Sorting nexin-24 OS=Homo sapiens OX=9606 GN=SNX24 PE=1 SV=1	17	2	2	2	169	19.8	7.24	14
Q8TDZ2	MICAL1	[F-actin]-monooxygenase MICAL1 OS=Homo sapiens OX=9606 GN=MICAL1 PE=1 SV=2	3	3	3	3	1067	117.8	6.4	64	88.9	97.5	93.5	114.8	104.4	100.8
Q9NYY8	FASTKD2	FAST kinase domain-containing protein 2, mitochondrial OS=Homo sapiens OX=9606 GN=FASTKD2 PE=1 SV=1	1	1	1	1	710	81.4	8.05	26	98.5	85.8	103.4	112.5	100.5	99.3
P33240	CSTF2	Cleavage stimulation factor subunit 2 OS=Homo sapiens OX=9606 GN=CSTF2 PE=1 SV=1	28	13	20	7	577	60.9	6.83	427	97.9	97	100.5	100.1	101.2	103.3
Q6DHV7	ADAL	Adenosine deaminase-like protein OS=Homo sapiens OX=9606 GN=ADAL PE=1 SV=2	3	1	1	1	355	40.2	6.32	22	103.1	101.6	103.1	94.3	93.8	104
Q6PL18	ATAD2	ATPase family AAA domain-containing protein 2 OS=Homo sapiens OX=9606 GN=ATAD2 PE=1 SV=1	4	3	3	3	1390	158.5	6.32	18	116.4	106.8	121.8	85.3	85.3	84.3
Q8IZP0	ABI1	Abl interactor 1 OS=Homo sapiens OX=9606 GN=ABI1 PE=1 SV=4	27	12	15	11	508	55	7.06	368	96.5	98.9	97.4	101.5	105.2	100.5
P35998	PSMC2	26S proteasome regulatory subunit 7 OS=Homo sapiens OX=9606 GN=PSMC2 PE=1 SV=3	64	28	74	28	433	48.6	5.95	1814	99.4	98.4	98.8	99.8	103.3	100.3
P12236	SLC25A6	ADP/ATP translocase 3 OS=Homo sapiens OX=9606 GN=SLC25A6 PE=1 SV=4	67	21	59	4	298	32.8	9.74	1125	92.5	106.3	105	94	102	100.1
Q6AWC2	WWC2	Protein WWC2 OS=Homo sapiens OX=9606 GN=WWC2 PE=1 SV=2	1	1	1	1	1192	133.8	5.53	13
P29373	CRABP2	Cellular retinoic acid-binding protein 2 OS=Homo sapiens OX=9606 GN=CRABP2 PE=1 SV=2	51	6	7	6	138	15.7	5.4	49	99.1	112.8	105	88.7	90.8	103.5
Q9H0A0	NAT10	RNA cytidine acetyltransferase OS=Homo sapiens OX=9606 GN=NAT10 PE=1 SV=2	37	30	42	30	1025	115.7	8.27	886	106.7	104.7	103.1	94.7	96.8	93.9
Q86X02	CDR2L	Cerebellar degeneration-related protein 2-like OS=Homo sapiens OX=9606 GN=CDR2L PE=1 SV=2	14	5	6	5	465	53	6.01	100	93.3	95.1	94.3	110.7	106.3	100.4
Q14435	GALNT3	Polypeptide N-acetylgalactosaminyltransferase 3 OS=Homo sapiens OX=9606 GN=GALNT3 PE=1 SV=2	20	10	12	10	633	72.6	7.99	234	95.5	89.2	90	110.7	107.9	106.8
Q04837	SSBP1	Single-stranded DNA-binding protein, mitochondrial OS=Homo sapiens OX=9606 GN=SSBP1 PE=1 SV=1	56	8	19	8	148	17.2	9.6	465	97.9	98.1	102.5	100.7	101	99.8
Q8NAN2	MIGA1	Mitoguardin 1 OS=Homo sapiens OX=9606 GN=MIGA1 PE=1 SV=1	13	6	6	6	632	71	5.63	115	90	88.2	90	109.9	100.8	121
Q9NR50	EIF2B3	Translation initiation factor eIF-2B subunit gamma OS=Homo sapiens OX=9606 GN=EIF2B3 PE=1 SV=1	50	20	23	20	452	50.2	6.47	468	98.2	100.7	98.5	100.8	100.8	101
Q13630	TSTA3	GDP-L-fucose synthase OS=Homo sapiens OX=9606 GN=TSTA3 PE=1 SV=1	31	7	11	7	321	35.9	6.6	348	105.9	108.2	101.4	93.8	95.8	94.9
P18887	XRCC1	DNA repair protein XRCC1 OS=Homo sapiens OX=9606 GN=XRCC1 PE=1 SV=2	6	4	4	4	633	69.4	6.39	0	99.3	103.1	98	99.8	99.8	100
Q9UBP9	GULP1	PTB domain-containing engulfment adapter protein 1 OS=Homo sapiens OX=9606 GN=GULP1 PE=1 SV=1	3	1	1	1	304	34.5	7.9	17	92.5	99.6	95	104.4	106.3	102.1
O95747	OXSR1	Serine/threonine-protein kinase OSR1 OS=Homo sapiens OX=9606 GN=OXSR1 PE=1 SV=1	52	21	38	18	527	58	6.43	1253	96.4	98.5	95.5	103.9	103.1	102.7
Q9Y2K9	STXBP5L	Syntaxin-binding protein 5-like OS=Homo sapiens OX=9606 GN=STXBP5L PE=1 SV=2	2	1	1	1	1186	131.8	6.95	0
Q15651	HMGN3	High mobility group nucleosome-binding domain-containing protein 3 OS=Homo sapiens OX=9606 GN=HMGN3 PE=1 SV=2	9	1	1	1	99	10.7	9.66	26	100	106.5	97.7	98.6	100.1	97.1
Q9UP38	FZD1	Frizzled-1 OS=Homo sapiens OX=9606 GN=FZD1 PE=1 SV=2	1	1	1	1	647	71.1	7.99	28	100.3	95.3	92.5	112	95.6	104.2
P11172	UMPS	Uridine 5'-monophosphate synthase OS=Homo sapiens OX=9606 GN=UMPS PE=1 SV=1	40	17	21	17	480	52.2	7.24	384	103.2	98.6	98.5	100.9	98.7	100.1
Q96T51	RUFY1	RUN and FYVE domain-containing protein 1 OS=Homo sapiens OX=9606 GN=RUFY1 PE=1 SV=2	31	20	27	18	708	79.8	5.74	487	98.7	101.3	99.3	101.3	99.3	100
P39687	ANP32A	Acidic leucine-rich nuclear phosphoprotein 32 family member A OS=Homo sapiens OX=9606 GN=ANP32A PE=1 SV=1	31	10	33	4	249	28.6	4.09	483	106	105.4	104.5	94	93.4	96.5
P49069	CAMLG	Calcium signal-modulating cyclophilin ligand OS=Homo sapiens OX=9606 GN=CAMLG PE=1 SV=1	3	1	1	1	296	32.9	8.05	0
Q9P2P1	NYNRIN	Protein NYNRIN OS=Homo sapiens OX=9606 GN=NYNRIN PE=2 SV=3	1	1	1	1	1898	208.2	8.02	0
O94885	SASH1	SAM and SH3 domain-containing protein 1 OS=Homo sapiens OX=9606 GN=SASH1 PE=1 SV=3	1	1	1	1	1247	136.6	6.09	0
Q6PII3	CCDC174	Coiled-coil domain-containing protein 174 OS=Homo sapiens OX=9606 GN=CCDC174 PE=1 SV=3	2	1	1	1	467	53.9	6.33	27
Q9Y3E1	HDGFL3	Hepatoma-derived growth factor-related protein 3 OS=Homo sapiens OX=9606 GN=HDGFL3 PE=1 SV=1	24	5	7	4	203	22.6	7.99	131	96.8	99.2	98.1	98.7	97	110.1
P80217	IFI35	Interferon-induced 35 kDa protein OS=Homo sapiens OX=9606 GN=IFI35 PE=1 SV=5	23	5	6	5	286	31.5	6.09	141	98.5	103.6	98.6	101	96.9	101.4
Q9H6R4	NOL6	Nucleolar protein 6 OS=Homo sapiens OX=9606 GN=NOL6 PE=1 SV=2	10	8	9	8	1146	127.5	7.64	160	103.4	95.9	111.3	94.9	95.9	98.6
Q96FZ5	CMTM7	CKLF-like MARVEL transmembrane domain-containing protein 7 OS=Homo sapiens OX=9606 GN=CMTM7 PE=2 SV=1	26	2	3	2	175	18.8	8.02	124	92.2	99.8	112.4	95.7	99.6	100.2
Q9P2Q2	FRMD4A	FERM domain-containing protein 4A OS=Homo sapiens OX=9606 GN=FRMD4A PE=1 SV=3	3	3	3	2	1039	115.4	8.87	32	100.5	103.1	100.2	95.4	98.5	102.3
Q9UKL6	PCTP	Phosphatidylcholine transfer protein OS=Homo sapiens OX=9606 GN=PCTP PE=1 SV=1	13	3	3	3	214	24.8	5.78	14	85.8	93.4	93.6	112.3	110.4	104.6
Q96SN8	CDK5RAP2	CDK5 regulatory subunit-associated protein 2 OS=Homo sapiens OX=9606 GN=CDK5RAP2 PE=1 SV=5	1	1	1	1	1893	214.9	5.58	38
P09382	LGALS1	Galectin-1 OS=Homo sapiens OX=9606 GN=LGALS1 PE=1 SV=2	91	11	83	11	135	14.7	5.5	2340	81.6	90.1	84.9	116.6	114	112.8
Q6ZRQ5	MMS22L	Protein MMS22-like OS=Homo sapiens OX=9606 GN=MMS22L PE=1 SV=3	3	3	3	3	1243	142.2	7.12	63	105.5	109.7	106.6	90.6	90.6	97
P08670	VIM	Vimentin OS=Homo sapiens OX=9606 GN=VIM PE=1 SV=4	87	49	310	44	466	53.6	5.12	7577	92.3	94.2	92.2	105.5	107.7	108.1
Q5T440	IBA57	Putative transferase CAF17, mitochondrial OS=Homo sapiens OX=9606 GN=IBA57 PE=1 SV=1	12	2	2	2	356	38.1	9.83	95	102.1	99.2	92.1	98	99.2	109.3
Q9UL26	RAB22A	Ras-related protein Rab-22A OS=Homo sapiens OX=9606 GN=RAB22A PE=1 SV=2	36	6	7	5	194	21.8	8.15	135	95.2	100.8	100.4	95.7	94.9	113.1
Q8IX90	SKA3	Spindle and kinetochore-associated protein 3 OS=Homo sapiens OX=9606 GN=SKA3 PE=1 SV=2	18	5	5	5	412	46.3	5.11	99	97.4	84.5	97.5	113.1	101.2	106.3
Q9Y3Q8	TSC22D4	TSC22 domain family protein 4 OS=Homo sapiens OX=9606 GN=TSC22D4 PE=1 SV=2	10	4	4	2	395	41	7.21	86	96.2	102.4	101.8	100	101	98.7
O00443	PIK3C2A	Phosphatidylinositol 4-phosphate 3-kinase C2 domain-containing subunit alpha OS=Homo sapiens OX=9606 GN=PIK3C2A PE=1 SV=2	8	13	17	12	1686	190.6	8.02	223	103.2	100.4	98.9	102	97.1	98.4
Q9UJW0	DCTN4	Dynactin subunit 4 OS=Homo sapiens OX=9606 GN=DCTN4 PE=1 SV=1	42	13	16	13	460	52.3	7.34	343	98.6	97.8	99.7	100.3	100.6	103
Q03701	CEBPZ	CCAAT/enhancer-binding protein zeta OS=Homo sapiens OX=9606 GN=CEBPZ PE=1 SV=3	21	19	23	19	1054	120.9	5.94	456	106.9	100.3	107	95.4	94.1	96.3
P09012	SNRPA	U1 small nuclear ribonucleoprotein A OS=Homo sapiens OX=9606 GN=SNRPA PE=1 SV=3	43	10	17	8	282	31.3	9.83	349	99.9	102.3	101	97.9	100.9	98.1
O43683	BUB1	Mitotic checkpoint serine/threonine-protein kinase BUB1 OS=Homo sapiens OX=9606 GN=BUB1 PE=1 SV=1	2	2	2	2	1085	122.3	6.47	0	100.2	100.2	101.4	100.6	98.8	98.8
Q9H008	LHPP	Phospholysine phosphohistidine inorganic pyrophosphate phosphatase OS=Homo sapiens OX=9606 GN=LHPP PE=1 SV=2	3	1	1	1	270	29.1	6.15	20
P29353	SHC1	SHC-transforming protein 1 OS=Homo sapiens OX=9606 GN=SHC1 PE=1 SV=4	19	8	10	8	583	62.8	6.44	251	105.5	107.3	105.6	92.2	92.6	96.9
Q03393	PTS	6-pyruvoyl tetrahydrobiopterin synthase OS=Homo sapiens OX=9606 GN=PTS PE=1 SV=1	23	3	3	3	145	16.4	6.68	85	97.1	105	109	96.1	96.1	96.8
O95793	STAU1	Double-stranded RNA-binding protein Staufen homolog 1 OS=Homo sapiens OX=9606 GN=STAU1 PE=1 SV=2	36	20	26	19	577	63.1	9.44	474	107.7	106.1	109.7	92.5	92.6	91.4
O75054	IGSF3	Immunoglobulin superfamily member 3 OS=Homo sapiens OX=9606 GN=IGSF3 PE=2 SV=3	2	2	2	2	1194	135.1	6.07	19	102.7	97.6	98.8	104	95	102
Q9NS25	SPANXB1	Sperm protein associated with the nucleus on the X chromosome B1 OS=Homo sapiens OX=9606 GN=SPANXB1 PE=2 SV=2	63	4	12	3	103	11.8	6.15	381	77.9	75.3	78.3	133.1	117.8	117.6
Q16658	FSCN1	Fascin OS=Homo sapiens OX=9606 GN=FSCN1 PE=1 SV=3	42	18	25	18	493	54.5	7.24	513	92	97.7	94.8	104	105.9	105.5
Q9BPY3	FAM118B	Protein FAM118B OS=Homo sapiens OX=9606 GN=FAM118B PE=1 SV=1	17	4	5	4	351	39.5	5.99	92	100.3	98.6	104.3	102	97.4	97.4
Q9BU79	TMEM243	Transmembrane protein 243 OS=Homo sapiens OX=9606 GN=TMEM243 PE=1 SV=1	16	1	1	1	118	13.4	8.18	19	104.5	107.6	104.7	95.9	100.7	86.6
O60462	NRP2	Neuropilin-2 OS=Homo sapiens OX=9606 GN=NRP2 PE=1 SV=3	6	4	4	4	931	104.8	5.17	68	103	99.5	101.2	102.9	95.9	97.5
O14613	CDC42EP2	Cdc42 effector protein 2 OS=Homo sapiens OX=9606 GN=CDC42EP2 PE=1 SV=1	5	1	1	1	210	22.5	5.12	20
Q9NR45	NANS	Sialic acid synthase OS=Homo sapiens OX=9606 GN=NANS PE=1 SV=2	43	13	27	13	359	40.3	6.74	577	92.2	97.1	98.2	103.4	106.2	102.9
P50914	RPL14	60S ribosomal protein L14 OS=Homo sapiens OX=9606 GN=RPL14 PE=1 SV=4	31	7	26	7	215	23.4	10.93	418	101.2	101	104.9	95	99.4	98.5
Q9H3Q1	CDC42EP4	Cdc42 effector protein 4 OS=Homo sapiens OX=9606 GN=CDC42EP4 PE=1 SV=1	18	4	5	4	356	38	5.19	155	99.5	103.9	105.9	95.7	95.5	99.4
Q9BW27	NUP85	Nuclear pore complex protein Nup85 OS=Homo sapiens OX=9606 GN=NUP85 PE=1 SV=1	20	11	16	11	656	75	5.55	356	104	101.8	104.3	95.3	97.3	97.3
Q9Y4P8	WIPI2	WD repeat domain phosphoinositide-interacting protein 2 OS=Homo sapiens OX=9606 GN=WIPI2 PE=1 SV=1	21	7	7	6	454	49.4	6.46	157	93.1	96.9	93.4	105.9	103.8	106.9
P07900	HSP90AA1	Heat shock protein HSP 90-alpha OS=Homo sapiens OX=9606 GN=HSP90AA1 PE=1 SV=5	61	53	353	32	732	84.6	5.02	7315	97.8	102.2	115.2	91.2	96.8	96.8
P02768	ALB	Serum albumin OS=Homo sapiens OX=9606 GN=ALB PE=1 SV=2	8	6	18	6	609	69.3	6.28	265	88.7	97.4	82.7	91.3	141.7	98.2
Q9NUI1	DECR2	Peroxisomal 2,4-dienoyl-CoA reductase OS=Homo sapiens OX=9606 GN=DECR2 PE=1 SV=1	6	2	2	2	292	30.8	9.22	32	93.3	93.8	97.8	98.1	101.7	115.2
Q13885	TUBB2A	Tubulin beta-2A chain OS=Homo sapiens OX=9606 GN=TUBB2A PE=1 SV=1	57	21	191	2	445	49.9	4.89	4114	81.2	85.6	84.1	118.8	119.5	110.9
Q96LW7	CARD19	Caspase recruitment domain-containing protein 19 OS=Homo sapiens OX=9606 GN=CARD19 PE=1 SV=1	10	2	2	2	228	25.6	9.2	26	103.4	101.3	96.6	96.3	100.2	102.2
Q96DP5	MTFMT	Methionyl-tRNA formyltransferase, mitochondrial OS=Homo sapiens OX=9606 GN=MTFMT PE=1 SV=2	6	2	2	2	389	43.8	9.66	48	98.2	97	104.7	100.2	95.1	104.7
Q92575	UBXN4	UBX domain-containing protein 4 OS=Homo sapiens OX=9606 GN=UBXN4 PE=1 SV=2	14	6	7	6	508	56.7	6.38	177	97.8	95.2	105	103.3	100.7	98.1
P63220	RPS21	40S ribosomal protein S21 OS=Homo sapiens OX=9606 GN=RPS21 PE=1 SV=1	72	7	19	7	83	9.1	8.5	418	100.8	96.3	98.6	100.8	100.3	103.2
Q96EY1	DNAJA3	DnaJ homolog subfamily A member 3, mitochondrial OS=Homo sapiens OX=9606 GN=DNAJA3 PE=1 SV=2	21	8	9	8	480	52.5	9.26	211	98.9	96.8	102.8	100.3	101.7	99.5
Q8NB15	ZNF511	Zinc finger protein 511 OS=Homo sapiens OX=9606 GN=ZNF511 PE=1 SV=2	11	2	2	2	252	28.2	7.66	30	97.4	93.6	97	102.3	100.3	109.3
P27144	AK4	Adenylate kinase 4, mitochondrial OS=Homo sapiens OX=9606 GN=AK4 PE=1 SV=1	36	8	10	8	223	25.3	8.4	165	92.5	96	93.1	110.7	104.7	102.9
Q7LC44	ARC	Activity-regulated cytoskeleton-associated protein OS=Homo sapiens OX=9606 GN=ARC PE=1 SV=1	2	1	1	1	396	45.3	5.63	0	116.9	110.4	97.8	87.3	91.8	95.8
Q05823	RNASEL	2-5A-dependent ribonuclease OS=Homo sapiens OX=9606 GN=RNASEL PE=1 SV=2	4	2	2	1	741	83.5	6.65	15	105.3	100.5	106.7	96.3	90.5	100.7
O14939	PLD2	Phospholipase D2 OS=Homo sapiens OX=9606 GN=PLD2 PE=1 SV=2	4	3	3	3	933	105.9	7.64	43	107.7	112.2	102.5	93.9	92	91.6
Q1ED39	KNOP1	Lysine-rich nucleolar protein 1 OS=Homo sapiens OX=9606 GN=KNOP1 PE=1 SV=1	12	3	3	3	458	51.6	9.86	41	96.1	97.7	103.2	101.1	104.8	97
Q9NUJ3	TCP11L1	T-complex protein 11-like protein 1 OS=Homo sapiens OX=9606 GN=TCP11L1 PE=1 SV=1	8	3	3	3	509	57	5.59	103	98.3	96.1	89.3	104.5	104.1	107.7
P18206	VCL	Vinculin OS=Homo sapiens OX=9606 GN=VCL PE=1 SV=4	64	71	144	71	1134	123.7	5.66	3403	104.2	105.7	101.7	95.5	97	96
Q9NW64	RBM22	Pre-mRNA-splicing factor RBM22 OS=Homo sapiens OX=9606 GN=RBM22 PE=1 SV=1	23	8	13	8	420	46.9	8.54	287	102.7	96.6	103.2	99.2	98.7	99.4
Q9Y324	FCF1	rRNA-processing protein FCF1 homolog OS=Homo sapiens OX=9606 GN=FCF1 PE=2 SV=1	7	1	1	1	198	23.4	9.7	40	118.1	123.6	110.8	82.4	81.7	83.4
P98196	ATP11A	Probable phospholipid-transporting ATPase IH OS=Homo sapiens OX=9606 GN=ATP11A PE=1 SV=3	6	6	6	6	1134	129.7	6.6	38	101.5	103.2	99.7	101	94.5	100.2
Q96DC7	TMCO6	Transmembrane and coiled-coil domain-containing protein 6 OS=Homo sapiens OX=9606 GN=TMCO6 PE=1 SV=2	5	2	3	2	493	54.4	5.81	91	105.2	98.8	94.7	95.7	94.1	111.6
Q8TED4	SLC37A2	Glucose-6-phosphate exchanger SLC37A2 OS=Homo sapiens OX=9606 GN=SLC37A2 PE=2 SV=2	5	2	3	2	501	54.4	6.81	48	95.4	102.9	95.1	105.8	97.8	103.1
Q14156	EFR3A	Protein EFR3 homolog A OS=Homo sapiens OX=9606 GN=EFR3A PE=1 SV=2	7	5	5	5	821	92.9	6.7	101	89.1	94.8	95	104.5	109.6	106.9
Q16531	DDB1	DNA damage-binding protein 1 OS=Homo sapiens OX=9606 GN=DDB1 PE=1 SV=1	43	42	62	42	1140	126.9	5.26	1161	99.4	102.5	100.4	99.8	99.8	98.1
P31947	SFN	14-3-3 protein sigma OS=Homo sapiens OX=9606 GN=SFN PE=1 SV=1	75	21	67	16	248	27.8	4.74	1189	89.4	89.1	89.3	112.1	112.1	108
Q9UJV9	DDX41	Probable ATP-dependent RNA helicase DDX41 OS=Homo sapiens OX=9606 GN=DDX41 PE=1 SV=2	21	12	13	12	622	69.8	6.84	215	106.8	102.7	106.9	92.8	93.6	97.1
Q5JSH3	WDR44	WD repeat-containing protein 44 OS=Homo sapiens OX=9606 GN=WDR44 PE=1 SV=1	14	11	12	11	913	101.3	5.45	246	94.8	99.1	102	100.1	101.9	102.1
O00483	NDUFA4	Cytochrome c oxidase subunit NDUFA4 OS=Homo sapiens OX=9606 GN=NDUFA4 PE=1 SV=1	56	5	7	5	81	9.4	9.38	112	120.3	100.4	112.6	94.1	84.9	87.8
P62714	PPP2CB	Serine/threonine-protein phosphatase 2A catalytic subunit beta isoform OS=Homo sapiens OX=9606 GN=PPP2CB PE=1 SV=1	69	16	25	2	309	35.6	5.43	644	103.9	97.6	100.3	95.6	101.4	101.1
Q8WXI9	GATAD2B	Transcriptional repressor p66-beta OS=Homo sapiens OX=9606 GN=GATAD2B PE=1 SV=1	21	10	10	9	593	65.2	9.7	205	101.8	96.3	104.3	98.8	93	105.9
P24941	CDK2	Cyclin-dependent kinase 2 OS=Homo sapiens OX=9606 GN=CDK2 PE=1 SV=2	41	12	16	11	298	33.9	8.68	251	92.8	93.7	102.8	102	101.8	106.9
P31946	YWHAB	14-3-3 protein beta/alpha OS=Homo sapiens OX=9606 GN=YWHAB PE=1 SV=3	69	14	72	7	246	28.1	4.83	1683	93.4	97	100.3	103.6	104.6	101.1
O15234	CASC3	Protein CASC3 OS=Homo sapiens OX=9606 GN=CASC3 PE=1 SV=2	2	1	1	1	703	76.2	6.48	25	101.7	102.4	103.7	100.9	96.4	94.8
Q969T9	WBP2	WW domain-binding protein 2 OS=Homo sapiens OX=9606 GN=WBP2 PE=1 SV=1	16	4	6	4	261	28.1	5.91	158	91.7	93.8	98.2	109.4	105.6	101.3
P56192	MARS	Methionine--tRNA ligase, cytoplasmic OS=Homo sapiens OX=9606 GN=MARS PE=1 SV=2	45	31	56	31	900	101.1	6.16	1448	103.4	97.7	98.2	98.5	102.2	99.9
Q8WU79	SMAP2	Stromal membrane-associated protein 2 OS=Homo sapiens OX=9606 GN=SMAP2 PE=1 SV=1	10	4	6	4	429	46.8	8.87	55	98.6	90.2	96.5	108.6	97.7	108.5
Q96N68	C18orf15	Putative uncharacterized protein C18orf15 OS=Homo sapiens OX=9606 GN=C18orf15 PE=5 SV=1	4	1	1	1	181	19.1	7.46	0	100.6	103.7	102.4	89.2	96.3	107.8
Q8N612	FAM160A2	FTS and Hook-interacting protein OS=Homo sapiens OX=9606 GN=FAM160A2 PE=1 SV=3	2	1	1	1	972	105.5	6.77	53	93.6	93.9	116.4	108.9	88.3	98.9
P33552	CKS2	Cyclin-dependent kinases regulatory subunit 2 OS=Homo sapiens OX=9606 GN=CKS2 PE=1 SV=1	33	3	4	2	79	9.9	8.46	32	107.2	101.6	112.6	94.6	90.2	93.8
Q8N465	D2HGDH	D-2-hydroxyglutarate dehydrogenase, mitochondrial OS=Homo sapiens OX=9606 GN=D2HGDH PE=1 SV=3	4	1	1	1	521	56.4	7.99	0	108.3	112.5	101.2	86.2	97.6	94.3
Q9UPY6	WASF3	Wiskott-Aldrich syndrome protein family member 3 OS=Homo sapiens OX=9606 GN=WASF3 PE=1 SV=2	10	3	5	2	502	55.3	6.43	86	114	103.6	93.8	96.1	88.4	104.1
Q9BYD3	MRPL4	39S ribosomal protein L4, mitochondrial OS=Homo sapiens OX=9606 GN=MRPL4 PE=1 SV=1	22	4	5	4	311	34.9	9.72	127	99.4	99.2	100.1	103.3	96.7	101.4
Q9Y256	RCE1	CAAX prenyl protease 2 OS=Homo sapiens OX=9606 GN=RCE1 PE=1 SV=1	10	3	4	3	329	35.8	7.97	59	104.5	97.5	98.9	100.3	100.8	98
Q9H3N1	TMX1	Thioredoxin-related transmembrane protein 1 OS=Homo sapiens OX=9606 GN=TMX1 PE=1 SV=1	24	8	13	8	280	31.8	4.98	173	97.6	101.4	99.9	96.6	103.7	100.9
Q9BS16	CENPK	Centromere protein K OS=Homo sapiens OX=9606 GN=CENPK PE=1 SV=1	4	1	1	1	269	31.6	4.89	17	95.7	88.4	117.5	87.1	126.8	84.5
Q96ST3	SIN3A	Paired amphipathic helix protein Sin3a OS=Homo sapiens OX=9606 GN=SIN3A PE=1 SV=2	21	20	25	20	1273	145.1	7.25	603	102.4	103.8	102.4	97.5	96.6	97.1
Q460N5	PARP14	Protein mono-ADP-ribosyltransferase PARP14 OS=Homo sapiens OX=9606 GN=PARP14 PE=1 SV=3	4	4	4	4	1801	202.7	7.18	33	88	93	101.7	100.3	104.6	112.5
P52565	ARHGDIA	Rho GDP-dissociation inhibitor 1 OS=Homo sapiens OX=9606 GN=ARHGDIA PE=1 SV=3	81	12	36	12	204	23.2	5.11	573	96.4	98	94.7	103.4	103.3	104.2
O00762	UBE2C	Ubiquitin-conjugating enzyme E2 C OS=Homo sapiens OX=9606 GN=UBE2C PE=1 SV=1	56	7	9	7	179	19.6	7.37	210	106.1	94.9	119.1	97.5	86.6	95.8
P11908	PRPS2	Ribose-phosphate pyrophosphokinase 2 OS=Homo sapiens OX=9606 GN=PRPS2 PE=1 SV=2	43	12	19	7	318	34.7	6.61	453	110	112.6	106.9	90.8	90.8	88.9
Q7Z7K0	CMC1	COX assembly mitochondrial protein homolog OS=Homo sapiens OX=9606 GN=CMC1 PE=1 SV=1	25	2	2	2	106	12.5	8.63	67	92.6	73.1	94.5	124.7	106.8	108.4
P23511	NFYA	Nuclear transcription factor Y subunit alpha OS=Homo sapiens OX=9606 GN=NFYA PE=1 SV=2	5	1	1	1	347	36.9	8.94	61	102.5	104.4	110.3	96.2	92.4	94.2
Q9H1B7	IRF2BPL	Probable E3 ubiquitin-protein ligase IRF2BPL OS=Homo sapiens OX=9606 GN=IRF2BPL PE=1 SV=1	6	3	4	3	796	82.6	8.24	146	98.9	101.7	100.5	99.6	100.2	99.1
Q86VM9	ZC3H18	Zinc finger CCCH domain-containing protein 18 OS=Homo sapiens OX=9606 GN=ZC3H18 PE=1 SV=2	13	11	11	11	953	106.3	8.32	124	98.1	97.2	101.9	96.7	99.8	106.3
P60033	CD81	CD81 antigen OS=Homo sapiens OX=9606 GN=CD81 PE=1 SV=1	19	3	5	3	236	25.8	5.29	189	101	95.5	99	103.4	102.8	98.3
Q9H4L7	SMARCAD1	SWI/SNF-related matrix-associated actin-dependent regulator of chromatin subfamily A containing DEAD/H box 1 OS=Homo sapiens OX=9606 GN=SMARCAD1 PE=1 SV=2	4	4	4	4	1026	117.3	5.55	66	105.4	96.4	104.8	100.1	95.4	97.8
Q5TGY1	TMCO4	Transmembrane and coiled-coil domain-containing protein 4 OS=Homo sapiens OX=9606 GN=TMCO4 PE=2 SV=1	7	2	2	2	634	67.9	5.85	0	94.8	104	93.4	103.9	99	105
Q02880	TOP2B	DNA topoisomerase 2-beta OS=Homo sapiens OX=9606 GN=TOP2B PE=1 SV=3	27	37	47	24	1626	183.2	8	878	102.6	104.2	102.1	95.9	97.3	97.9
Q9UJU6	DBNL	Drebrin-like protein OS=Homo sapiens OX=9606 GN=DBNL PE=1 SV=1	40	13	15	13	430	48.2	5.05	331	95	100.9	97.4	102.7	102.4	101.6
Q96D15	RCN3	Reticulocalbin-3 OS=Homo sapiens OX=9606 GN=RCN3 PE=1 SV=1	12	3	3	3	328	37.5	4.89	77	103.5	101.7	97	101.1	96	100.8
Q9NQ34	TMEM9B	Transmembrane protein 9B OS=Homo sapiens OX=9606 GN=TMEM9B PE=1 SV=1	9	2	2	2	198	22.5	8.06	23	98.3	93.4	98.2	102.1	100.8	107.2
P04004	VTN	Vitronectin OS=Homo sapiens OX=9606 GN=VTN PE=1 SV=1	5	2	4	2	478	54.3	5.8	130	96.9	112.9	98	97.6	99.2	95.4
Q01105	SET	Protein SET OS=Homo sapiens OX=9606 GN=SET PE=1 SV=3	53	12	32	12	290	33.5	4.32	566	105.4	102.3	104.5	96.5	97.7	93.5
P55072	VCP	Transitional endoplasmic reticulum ATPase OS=Homo sapiens OX=9606 GN=VCP PE=1 SV=4	76	50	152	50	806	89.3	5.26	3778	101.9	101.9	99.6	97.1	99.4	100.1
Q9BV73	CEP250	Centrosome-associated protein CEP250 OS=Homo sapiens OX=9606 GN=CEP250 PE=1 SV=2	4	7	7	7	2442	281	5.02	88	98.7	99.3	105.6	101.4	96.1	98.9
Q14165	MLEC	Malectin OS=Homo sapiens OX=9606 GN=MLEC PE=1 SV=1	45	11	19	11	292	32.2	5.41	407	91.9	93.1	91.5	109.2	109.2	105.2
Q9H832	UBE2Z	Ubiquitin-conjugating enzyme E2 Z OS=Homo sapiens OX=9606 GN=UBE2Z PE=1 SV=2	29	9	10	9	354	38.2	5.62	177	100.7	95.9	97.8	100.4	99.7	105.6
P23025	XPA	DNA repair protein complementing XP-A cells OS=Homo sapiens OX=9606 GN=XPA PE=1 SV=1	12	2	2	2	273	31.3	6.73	63	106.8	102.9	103	96.4	92.1	98.8
Q5VTL8	PRPF38B	Pre-mRNA-splicing factor 38B OS=Homo sapiens OX=9606 GN=PRPF38B PE=1 SV=1	13	7	7	7	546	64.4	10.54	119	105.2	106.2	106.2	91.6	96.6	94.3
P26358	DNMT1	DNA (cytosine-5)-methyltransferase 1 OS=Homo sapiens OX=9606 GN=DNMT1 PE=1 SV=2	22	31	35	31	1616	183.1	7.75	649	111	104.5	114.4	86.6	88.1	95.3
Q8IYW5	RNF168	E3 ubiquitin-protein ligase RNF168 OS=Homo sapiens OX=9606 GN=RNF168 PE=1 SV=1	2	1	1	1	571	65	7.96	0	105.5	81.6	101.9	103.8	87.6	119.6
Q5TAT6	COL13A1	Collagen alpha-1(XIII) chain OS=Homo sapiens OX=9606 GN=COL13A1 PE=1 SV=1	3	2	3	2	717	69.9	9.17	57	101.2	93.8	95.4	114.9	96.7	97.9
P43358	MAGEA4	Melanoma-associated antigen 4 OS=Homo sapiens OX=9606 GN=MAGEA4 PE=1 SV=2	3	1	1	1	317	34.9	4.69	23	104.8	96	96.6	105	98.3	99.3
O43278	SPINT1	Kunitz-type protease inhibitor 1 OS=Homo sapiens OX=9606 GN=SPINT1 PE=1 SV=2	4	2	2	2	529	58.4	6.29	27	89.5	93.9	86.7	120.4	102.7	106.9
Q8NFC6	BOD1L1	Biorientation of chromosomes in cell division protein 1-like 1 OS=Homo sapiens OX=9606 GN=BOD1L1 PE=1 SV=2	3	6	7	5	3051	330.3	5.08	143	102.4	99.8	101.3	101.4	95.2	99.9
O15427	SLC16A3	Monocarboxylate transporter 4 OS=Homo sapiens OX=9606 GN=SLC16A3 PE=1 SV=1	15	8	17	8	465	49.4	7.96	276	99	102.1	95.6	103.4	102.2	97.8
Q9NSA3	CTNNBIP1	Beta-catenin-interacting protein 1 OS=Homo sapiens OX=9606 GN=CTNNBIP1 PE=1 SV=1	30	2	2	2	81	9.2	5.41	46	89.9	103.6	106.5	103.1	99.6	97.3
P17081	RHOQ	Rho-related GTP-binding protein RhoQ OS=Homo sapiens OX=9606 GN=RHOQ PE=1 SV=2	12	2	2	1	205	22.6	6.32	63	97.1	92.2	114.3	94.2	96	106.2
Q8NBL1	POGLUT1	Protein O-glucosyltransferase 1 OS=Homo sapiens OX=9606 GN=POGLUT1 PE=1 SV=1	11	4	5	4	392	46.2	8.72	122	100.4	99.8	96.9	103.6	96.5	102.7
Q13438	OS9	Protein OS-9 OS=Homo sapiens OX=9606 GN=OS9 PE=1 SV=1	7	4	4	4	667	75.5	4.87	50	92.5	93.4	95.9	102.5	96.3	119.6
O43657	TSPAN6	Tetraspanin-6 OS=Homo sapiens OX=9606 GN=TSPAN6 PE=1 SV=1	10	2	2	2	245	27.5	8.1	35	89.3	85.5	96.2	114.3	108.5	106.2
Q15043	SLC39A14	Zinc transporter ZIP14 OS=Homo sapiens OX=9606 GN=SLC39A14 PE=1 SV=3	8	3	3	3	492	54.2	5.33	103	99.4	98.4	106.3	95.8	95.4	104.6
P23381	WARS	Tryptophan--tRNA ligase, cytoplasmic OS=Homo sapiens OX=9606 GN=WARS PE=1 SV=2	52	23	37	23	471	53.1	6.23	824	98.3	90.1	98	106.8	105.9	100.9
Q5VY09	IER5	Immediate early response gene 5 protein OS=Homo sapiens OX=9606 GN=IER5 PE=1 SV=3	4	1	1	1	327	33.7	4.96	0	83.8	92.6	115.4	103.3	108.5	96.3
Q9UMX0	UBQLN1	Ubiquilin-1 OS=Homo sapiens OX=9606 GN=UBQLN1 PE=1 SV=2	34	11	25	6	589	62.5	5.11	750	103.7	107.6	103.3	94	95	96.4
P22413	ENPP1	Ectonucleotide pyrophosphatase/phosphodiesterase family member 1 OS=Homo sapiens OX=9606 GN=ENPP1 PE=1 SV=2	9	6	6	6	925	104.9	7.14	66	94.8	98.3	98.1	106.7	98.5	103.5
P10155	RO60	60 kDa SS-A/Ro ribonucleoprotein OS=Homo sapiens OX=9606 GN=RO60 PE=1 SV=2	40	21	36	21	538	60.6	8.03	815	101.3	101.5	100.5	100.4	99.3	97
P46100	ATRX	Transcriptional regulator ATRX OS=Homo sapiens OX=9606 GN=ATRX PE=1 SV=5	0	1	1	1	2492	282.4	6.58	38	101.6	94.1	103.9	101.6	98.7	100.1
Q9Y2X3	NOP58	Nucleolar protein 58 OS=Homo sapiens OX=9606 GN=NOP58 PE=1 SV=1	43	19	35	19	529	59.5	8.92	932	106.6	103.3	103.2	93.2	97.1	96.5
Q15758	SLC1A5	Neutral amino acid transporter B(0) OS=Homo sapiens OX=9606 GN=SLC1A5 PE=1 SV=2	24	10	22	10	541	56.6	5.48	515	114.4	99.1	115.5	88.5	91.4	91
Q96G03	PGM2	Phosphoglucomutase-2 OS=Homo sapiens OX=9606 GN=PGM2 PE=1 SV=4	45	28	42	27	612	68.2	6.73	644	94.8	93.3	90.8	105.4	109.6	106.1
O15381	NVL	Nuclear valosin-containing protein-like OS=Homo sapiens OX=9606 GN=NVL PE=1 SV=1	7	4	4	4	856	95	6.48	102	103.3	102.9	103.8	97.4	95.1	97.6
Q99848	EBNA1BP2	Probable rRNA-processing protein EBP2 OS=Homo sapiens OX=9606 GN=EBNA1BP2 PE=1 SV=2	41	11	15	11	306	34.8	10.1	217	115.6	106.4	117.5	88.5	84.6	87.3
Q9H7X7	IFT22	Intraflagellar transport protein 22 homolog OS=Homo sapiens OX=9606 GN=IFT22 PE=1 SV=1	12	1	2	1	185	20.8	5.15	35	104.5	114.5	99.1	81.7	95.8	104.5
Q8IU85	CAMK1D	Calcium/calmodulin-dependent protein kinase type 1D OS=Homo sapiens OX=9606 GN=CAMK1D PE=1 SV=1	20	6	8	3	385	42.9	7.21	192	101.8	98.4	101	97.4	97.7	103.7
Q5T0Z8	C6orf132	Uncharacterized protein C6orf132 OS=Homo sapiens OX=9606 GN=C6orf132 PE=1 SV=4	1	1	1	1	1188	124	9.45	38	95.6	97.7	95.4	103.9	99.8	107.6
Q6ZUJ8	PIK3AP1	Phosphoinositide 3-kinase adapter protein 1 OS=Homo sapiens OX=9606 GN=PIK3AP1 PE=1 SV=2	2	1	1	1	805	90.3	5.4	0
Q9UNF0	PACSIN2	Protein kinase C and casein kinase substrate in neurons protein 2 OS=Homo sapiens OX=9606 GN=PACSIN2 PE=1 SV=2	41	19	29	19	486	55.7	5.2	433	102.7	107.9	107.4	94.1	94	93.9
Q96N66	MBOAT7	Lysophospholipid acyltransferase 7 OS=Homo sapiens OX=9606 GN=MBOAT7 PE=1 SV=2	17	8	15	8	472	52.7	8.97	419	98.5	102.9	96.9	99.3	101.3	101.1
Q16773	KYAT1	Kynurenine--oxoglutarate transaminase 1 OS=Homo sapiens OX=9606 GN=KYAT1 PE=1 SV=1	7	3	3	2	422	47.8	6.47	71	93.9	98.9	95	102.9	106.7	102.6
Q9NVP1	DDX18	ATP-dependent RNA helicase DDX18 OS=Homo sapiens OX=9606 GN=DDX18 PE=1 SV=2	36	19	29	19	670	75.4	9.5	663	112.2	107.5	109.4	89.1	92.2	89.7
P49720	PSMB3	Proteasome subunit beta type-3 OS=Homo sapiens OX=9606 GN=PSMB3 PE=1 SV=2	50	10	21	10	205	22.9	6.55	448	95.2	96.1	97.3	105.2	103.4	102.9
Q96K17	BTF3L4	Transcription factor BTF3 homolog 4 OS=Homo sapiens OX=9606 GN=BTF3L4 PE=1 SV=1	20	5	6	3	158	17.3	6.35	123	76.3	77.1	80.7	124.5	113.7	127.8
Q9HBH0	RHOF	Rho-related GTP-binding protein RhoF OS=Homo sapiens OX=9606 GN=RHOF PE=1 SV=1	31	6	6	6	211	23.6	8.65	105	93.6	93.1	90.3	106.6	112.1	104.4
Q96SB3	PPP1R9B	Neurabin-2 OS=Homo sapiens OX=9606 GN=PPP1R9B PE=1 SV=3	14	9	11	9	817	89.3	4.97	266	99.3	100.9	101.8	97.6	97.3	103.1
P53367	ARFIP1	Arfaptin-1 OS=Homo sapiens OX=9606 GN=ARFIP1 PE=1 SV=2	28	12	18	11	373	41.7	6.7	363	101.6	103.6	103.5	96	94.1	101.3
Q9C0I1	MTMR12	Myotubularin-related protein 12 OS=Homo sapiens OX=9606 GN=MTMR12 PE=1 SV=2	12	6	6	6	747	86.1	6.62	160	99	97.9	97	102.2	102.3	101.7
Q9UFG5	C19orf25	UPF0449 protein C19orf25 OS=Homo sapiens OX=9606 GN=C19orf25 PE=1 SV=2	17	1	1	1	118	12.9	5.07	17	99.9	96.7	107.6	103.8	94.2	97.7
O43719	HTATSF1	HIV Tat-specific factor 1 OS=Homo sapiens OX=9606 GN=HTATSF1 PE=1 SV=1	24	14	15	14	755	85.8	4.4	275	101.3	97.7	102.6	102.2	97.8	98.5
P27482	CALML3	Calmodulin-like protein 3 OS=Homo sapiens OX=9606 GN=CALML3 PE=1 SV=2	23	3	4	1	149	16.9	4.42	53
Q9P265	DIP2B	Disco-interacting protein 2 homolog B OS=Homo sapiens OX=9606 GN=DIP2B PE=1 SV=3	9	11	11	9	1576	171.4	8.09	163	102.7	103.3	102.2	96.8	95.5	99.6
P21399	ACO1	Cytoplasmic aconitate hydratase OS=Homo sapiens OX=9606 GN=ACO1 PE=1 SV=3	44	31	50	31	889	98.3	6.68	875	88.9	95.9	91.6	111.4	105.1	107.1
Q9Y2L1	DIS3	Exosome complex exonuclease RRP44 OS=Homo sapiens OX=9606 GN=DIS3 PE=1 SV=2	38	30	42	30	958	108.9	7.14	1042	101.4	96.8	103.8	99.8	97.4	100.8
Q9Y5Q0	FADS3	Fatty acid desaturase 3 OS=Homo sapiens OX=9606 GN=FADS3 PE=1 SV=1	19	5	7	5	445	51.1	7.77	134	103.6	93.1	105.3	98	93.9	106.1
Q9Y2U5	MAP3K2	Mitogen-activated protein kinase kinase kinase 2 OS=Homo sapiens OX=9606 GN=MAP3K2 PE=1 SV=2	4	2	2	1	619	69.7	8	87	93.6	102.1	98	105.6	97.2	103.6
O60313	OPA1	Dynamin-like 120 kDa protein, mitochondrial OS=Homo sapiens OX=9606 GN=OPA1 PE=1 SV=3	41	33	48	33	960	111.6	7.87	1087	97.5	94.8	98.2	103.8	102.2	103.5
O96007	MOCS2	Molybdopterin synthase catalytic subunit OS=Homo sapiens OX=9606 GN=MOCS2 PE=1 SV=1	37	6	8	6	188	20.9	5.44	230	95.8	95.5	96.1	106	102.2	104.4
P16989	YBX3	Y-box-binding protein 3 OS=Homo sapiens OX=9606 GN=YBX3 PE=1 SV=4	40	9	23	6	372	40.1	9.77	728	98.3	89.6	99.9	108.7	99.1	104.5
Q8WZA9	IRGQ	Immunity-related GTPase family Q protein OS=Homo sapiens OX=9606 GN=IRGQ PE=1 SV=1	31	13	16	13	623	62.7	4.88	537	96.4	95	93.7	104.6	102.4	107.8
Q9NX58	LYAR	Cell growth-regulating nucleolar protein OS=Homo sapiens OX=9606 GN=LYAR PE=1 SV=2	30	12	21	12	379	43.6	9.54	438	103.1	105.7	107.3	92.8	96.1	95
P82650	MRPS22	28S ribosomal protein S22, mitochondrial OS=Homo sapiens OX=9606 GN=MRPS22 PE=1 SV=1	40	13	16	13	360	41.3	7.9	264	102.6	97	101.4	100.5	98.1	100.4
Q13617	CUL2	Cullin-2 OS=Homo sapiens OX=9606 GN=CUL2 PE=1 SV=2	26	17	25	17	745	86.9	6.92	528	100	99.8	97.1	101.5	101.8	99.8
O94953	KDM4B	Lysine-specific demethylase 4B OS=Homo sapiens OX=9606 GN=KDM4B PE=1 SV=4	2	1	1	1	1096	121.8	7.09	0
O95391	SLU7	Pre-mRNA-splicing factor SLU7 OS=Homo sapiens OX=9606 GN=SLU7 PE=1 SV=2	5	1	1	1	586	68.3	7.14	47	85	99.9	114.6	89.7	113.5	97.3
Q9NWQ9	C14orf119	Uncharacterized protein C14orf119 OS=Homo sapiens OX=9606 GN=C14orf119 PE=1 SV=1	14	2	3	2	140	16	4.94	59	96.2	85.4	113.2	104.8	91	109.4
Q4G0N4	NADK2	NAD kinase 2, mitochondrial OS=Homo sapiens OX=9606 GN=NADK2 PE=1 SV=2	17	6	7	6	442	49.4	8.18	189	105.3	102.6	100.5	97.1	98	96.4
Q9UHN1	POLG2	DNA polymerase subunit gamma-2, mitochondrial OS=Homo sapiens OX=9606 GN=POLG2 PE=1 SV=1	2	1	1	1	485	54.9	8.35	27	97.2	92.4	97.5	105.7	101.7	105.6
P21281	ATP6V1B2	V-type proton ATPase subunit B, brain isoform OS=Homo sapiens OX=9606 GN=ATP6V1B2 PE=1 SV=3	59	20	34	20	511	56.5	5.81	960	95.6	98.4	97.4	105.5	101.3	101.7
Q9NY93	DDX56	Probable ATP-dependent RNA helicase DDX56 OS=Homo sapiens OX=9606 GN=DDX56 PE=1 SV=1	6	3	3	3	547	61.6	9.26	22	101.7	93.1	102.4	108	93.5	101.4
Q9H9Q2	COPS7B	COP9 signalosome complex subunit 7b OS=Homo sapiens OX=9606 GN=COPS7B PE=1 SV=1	41	8	10	8	264	29.6	6.15	340	94.8	97.3	101.8	98.7	101.1	106.3
O43865	AHCYL1	S-adenosylhomocysteine hydrolase-like protein 1 OS=Homo sapiens OX=9606 GN=AHCYL1 PE=1 SV=2	31	17	22	7	530	58.9	6.89	375	104.1	103.6	106.2	98	93.8	94.4
Q6P3W7	SCYL2	SCY1-like protein 2 OS=Homo sapiens OX=9606 GN=SCYL2 PE=1 SV=1	13	9	9	9	929	103.6	8.22	185	97.5	97.7	99.3	97.7	102.9	105
Q13451	FKBP5	Peptidyl-prolyl cis-trans isomerase FKBP5 OS=Homo sapiens OX=9606 GN=FKBP5 PE=1 SV=2	42	18	22	18	457	51.2	5.9	489	95.2	96	94.6	103.4	106.3	104.6
Q5VIR6	VPS53	Vacuolar protein sorting-associated protein 53 homolog OS=Homo sapiens OX=9606 GN=VPS53 PE=1 SV=1	21	11	14	11	699	79.6	6.02	339	100.7	97	102	99.6	97	103.7
Q8N3D4	EHBP1L1	EH domain-binding protein 1-like protein 1 OS=Homo sapiens OX=9606 GN=EHBP1L1 PE=1 SV=2	27	30	34	29	1523	161.8	4.83	694	97.2	97.6	96.4	104.7	100.4	103.7
Q92820	GGH	Gamma-glutamyl hydrolase OS=Homo sapiens OX=9606 GN=GGH PE=1 SV=2	19	5	6	5	318	35.9	7.11	146	89.3	91.3	85.6	119.3	107.7	106.7
Q9UH65	SWAP70	Switch-associated protein 70 OS=Homo sapiens OX=9606 GN=SWAP70 PE=1 SV=1	53	29	36	29	585	69	5.87	571	96.4	101.9	97.8	100.5	103	100.5
Q96CS2	HAUS1	HAUS augmin-like complex subunit 1 OS=Homo sapiens OX=9606 GN=HAUS1 PE=1 SV=1	21	3	5	3	278	31.8	5.53	167	101.9	101	105.7	102.7	92.7	95.9
P0C0S5	H2AZ1	Histone H2A.Z OS=Homo sapiens OX=9606 GN=H2AZ1 PE=1 SV=2	31	4	24	2	128	13.5	10.58	450	104.9	108.1	104.3	90.1	97.8	94.8
Q9P273	TENM3	Teneurin-3 OS=Homo sapiens OX=9606 GN=TENM3 PE=2 SV=3	3	5	6	5	2699	300.8	6.42	109	98.8	98.3	96.3	106.1	100.9	99.6
Q96MW1	CCDC43	Coiled-coil domain-containing protein 43 OS=Homo sapiens OX=9606 GN=CCDC43 PE=1 SV=2	28	4	5	4	224	25.2	4.92	180	89.3	96	103.1	97.6	107.2	106.8
Q86V88	MDP1	Magnesium-dependent phosphatase 1 OS=Homo sapiens OX=9606 GN=MDP1 PE=1 SV=1	23	3	3	3	176	20.1	6.39	35	100.8	104.7	101.3	97.3	96.8	99.1
Q08209	PPP3CA	Serine/threonine-protein phosphatase 2B catalytic subunit alpha isoform OS=Homo sapiens OX=9606 GN=PPP3CA PE=1 SV=1	23	11	15	5	521	58.7	5.86	249	99.3	95.9	97.5	105.8	101.8	99.7
Q9BUL5	PHF23	PHD finger protein 23 OS=Homo sapiens OX=9606 GN=PHF23 PE=1 SV=1	3	1	1	1	403	43.8	5.78	29
Q8NAB2	KBTBD3	Kelch repeat and BTB domain-containing protein 3 OS=Homo sapiens OX=9606 GN=KBTBD3 PE=2 SV=3	1	1	1	1	612	69.8	5.35	28	112.7	115	103.5	87.1	92.9	88.8
Q9Y371	SH3GLB1	Endophilin-B1 OS=Homo sapiens OX=9606 GN=SH3GLB1 PE=1 SV=1	39	14	21	13	365	40.8	6.04	427	96.2	98.7	99.7	100	103.1	102.3
Q86X29	LSR	Lipolysis-stimulated lipoprotein receptor OS=Homo sapiens OX=9606 GN=LSR PE=1 SV=4	7	4	4	4	649	71.4	7.97	72	92.9	99.1	99.4	101.8	104.1	102.6
Q14676	MDC1	Mediator of DNA damage checkpoint protein 1 OS=Homo sapiens OX=9606 GN=MDC1 PE=1 SV=3	8	13	13	13	2089	226.5	5.47	162	101	101.8	105.9	97.6	96.6	97.1
Q96RL1	UIMC1	BRCA1-A complex subunit RAP80 OS=Homo sapiens OX=9606 GN=UIMC1 PE=1 SV=2	8	4	4	4	719	79.7	5.45	58	103.8	93.4	106.2	97.9	92.9	105.9
P29083	GTF2E1	General transcription factor IIE subunit 1 OS=Homo sapiens OX=9606 GN=GTF2E1 PE=1 SV=2	19	6	7	6	439	49.4	4.82	175	108.2	103.9	109.9	91.4	96	90.5
Q96T23	RSF1	Remodeling and spacing factor 1 OS=Homo sapiens OX=9606 GN=RSF1 PE=1 SV=2	6	7	8	7	1441	163.7	5.01	250	97.9	96.1	98.7	105.4	97.5	104.3
Q6DKJ4	NXN	Nucleoredoxin OS=Homo sapiens OX=9606 GN=NXN PE=1 SV=2	44	13	20	13	435	48.4	4.97	513	102	102.4	105.1	96.8	96.3	97.4
Q96CB8	INTS12	Integrator complex subunit 12 OS=Homo sapiens OX=9606 GN=INTS12 PE=1 SV=1	2	1	1	1	462	48.8	9.69	37	98.7	99.3	103.7	98.8	100	99.6
O75521	ECI2	Enoyl-CoA delta isomerase 2, mitochondrial OS=Homo sapiens OX=9606 GN=ECI2 PE=1 SV=4	45	15	23	15	394	43.6	9	678	97.1	98.1	95.8	103.6	103.1	102.4
Q6ZUM4	ARHGAP27	Rho GTPase-activating protein 27 OS=Homo sapiens OX=9606 GN=ARHGAP27 PE=1 SV=3	4	2	2	2	889	98.3	5.59	68	101.8	98.8	104.1	90.7	97.7	106.9
P62318	SNRPD3	Small nuclear ribonucleoprotein Sm D3 OS=Homo sapiens OX=9606 GN=SNRPD3 PE=1 SV=1	53	5	16	5	126	13.9	10.32	425	103.7	104.7	104.6	95	96.2	95.8
O14662	STX16	Syntaxin-16 OS=Homo sapiens OX=9606 GN=STX16 PE=1 SV=3	22	5	7	5	325	37	6.11	171	96.2	91.1	93.2	105.1	102.3	112.1
Q8TEA1	NSUN6	tRNA (cytosine(72)-C(5))-methyltransferase NSUN6 OS=Homo sapiens OX=9606 GN=NSUN6 PE=1 SV=1	7	3	3	3	469	51.7	7.96	23	113.8	104.9	104.5	92.2	92.5	92.2
Q9NXH9	TRMT1	tRNA (guanine(26)-N(2))-dimethyltransferase OS=Homo sapiens OX=9606 GN=TRMT1 PE=1 SV=1	17	9	9	9	659	72.2	7.64	166	103	97.1	109.5	92.5	98.4	99.5
O15050	TRANK1	TPR and ankyrin repeat-containing protein 1 OS=Homo sapiens OX=9606 GN=TRANK1 PE=2 SV=4	0	2	2	2	2925	336	6.76	32	110.9	95.9	104.2	99.6	94.1	95.2
P33176	KIF5B	Kinesin-1 heavy chain OS=Homo sapiens OX=9606 GN=KIF5B PE=1 SV=1	58	54	86	54	963	109.6	6.51	2025	105.3	108.3	106.2	90.7	94.9	94.6
Q8N163	CCAR2	Cell cycle and apoptosis regulator protein 2 OS=Homo sapiens OX=9606 GN=CCAR2 PE=1 SV=2	32	22	35	22	923	102.8	5.22	650	103.7	104.6	103.9	92.5	97.8	97.6
Q9H4M3	FBXO44	F-box only protein 44 OS=Homo sapiens OX=9606 GN=FBXO44 PE=1 SV=3	6	1	1	1	255	29.7	5.82	0	90.6	105.2	98.2	105.1	98.2	102.8
Q8NFF5	FLAD1	FAD synthase OS=Homo sapiens OX=9606 GN=FLAD1 PE=1 SV=1	16	6	6	6	587	65.2	6.93	159	90	89.4	93.2	108.8	109.9	108.7
Q96GX2	ATXN7L3B	Ataxin-7-like protein 3B OS=Homo sapiens OX=9606 GN=ATXN7L3B PE=1 SV=2	24	2	2	2	97	10.8	4.36	67	89.6	80.1	104.1	121.6	98.2	106.4
Q15629	TRAM1	Translocating chain-associated membrane protein 1 OS=Homo sapiens OX=9606 GN=TRAM1 PE=1 SV=3	12	4	5	4	374	43	9.63	114	89.7	89.5	91.5	110.7	113.1	105.5
P00742	F10	Coagulation factor X OS=Homo sapiens OX=9606 GN=F10 PE=1 SV=2	6	2	2	2	488	54.7	5.94	23	94.8	96.6	91.2	103.1	115.4	98.9
P80303	NUCB2	Nucleobindin-2 OS=Homo sapiens OX=9606 GN=NUCB2 PE=1 SV=3	22	8	12	8	420	50.2	5.12	194	84.5	89.5	87.3	118.8	112.6	107.4
Q9NZ63	C9orf78	Telomere length and silencing protein 1 homolog OS=Homo sapiens OX=9606 GN=C9orf78 PE=1 SV=1	25	6	7	6	289	33.7	6.74	140	103.4	102.9	108.3	90.9	95.1	99.3
Q96CD0	FBXL8	F-box/LRR-repeat protein 8 OS=Homo sapiens OX=9606 GN=FBXL8 PE=1 SV=1	7	2	2	2	374	40.5	7.31	26	86.1	96	88.9	112.3	105.3	111.3
Q13017	ARHGAP5	Rho GTPase-activating protein 5 OS=Homo sapiens OX=9606 GN=ARHGAP5 PE=1 SV=2	5	7	7	7	1502	172.4	6.62	70	100.1	96.2	97.7	101.4	95.7	109
P35908	KRT2	Keratin, type II cytoskeletal 2 epidermal OS=Homo sapiens OX=9606 GN=KRT2 PE=1 SV=2	35	18	22	13	639	65.4	8	569	123.5	95.9	102.2	85.7	91.8	101
Q9Y2S7	POLDIP2	Polymerase delta-interacting protein 2 OS=Homo sapiens OX=9606 GN=POLDIP2 PE=1 SV=1	27	7	8	7	368	42	8.63	161	98.7	98.4	98.9	102.4	99.5	102.1
Q9UDY2	TJP2	Tight junction protein ZO-2 OS=Homo sapiens OX=9606 GN=TJP2 PE=1 SV=2	36	34	52	33	1190	133.9	7.4	912	98.1	99.3	100.1	99.9	101.6	100.9
Q10471	GALNT2	Polypeptide N-acetylgalactosaminyltransferase 2 OS=Homo sapiens OX=9606 GN=GALNT2 PE=1 SV=1	35	16	22	16	571	64.7	8.35	403	101.7	106	100.3	99.8	95.3	96.9
Q5U5X0	LYRM7	Complex III assembly factor LYRM7 OS=Homo sapiens OX=9606 GN=LYRM7 PE=1 SV=1	16	1	1	1	104	11.9	9.66	23	95.5	98.9	100	102	100	103.6
Q9NTK5	OLA1	Obg-like ATPase 1 OS=Homo sapiens OX=9606 GN=OLA1 PE=1 SV=2	59	18	36	18	396	44.7	7.81	833	99.8	104.5	101.4	97.2	101.3	95.8
Q8IX04	UEVLD	Ubiquitin-conjugating enzyme E2 variant 3 OS=Homo sapiens OX=9606 GN=UEVLD PE=1 SV=2	10	5	6	5	471	52.2	7.09	127	97.4	93	95	110.8	102.3	101.4
P39019	RPS19	40S ribosomal protein S19 OS=Homo sapiens OX=9606 GN=RPS19 PE=1 SV=2	63	13	35	13	145	16.1	10.32	536	102.6	102	103.4	96	97.1	98.9
Q15437	SEC23B	Protein transport protein Sec23B OS=Homo sapiens OX=9606 GN=SEC23B PE=1 SV=2	33	19	32	18	767	86.4	6.89	874	98.1	96	101.9	102.3	100	101.6
Q01433	AMPD2	AMP deaminase 2 OS=Homo sapiens OX=9606 GN=AMPD2 PE=1 SV=2	25	21	26	21	879	100.6	6.93	384	108.7	109.7	103.1	91.8	92.5	94.2
Q99490	AGAP2	Arf-GAP with GTPase, ANK repeat and PH domain-containing protein 2 OS=Homo sapiens OX=9606 GN=AGAP2 PE=1 SV=2	1	1	1	1	1192	124.6	9.89	0	102.8	124.1	102.5	93.3	92	85.3
Q12893	TMEM115	Transmembrane protein 115 OS=Homo sapiens OX=9606 GN=TMEM115 PE=1 SV=1	17	4	5	4	351	38.2	8.16	66	97.8	102.8	99.9	102.2	101	96.3
Q9Y3A3	MOB4	MOB-like protein phocein OS=Homo sapiens OX=9606 GN=MOB4 PE=1 SV=1	33	5	8	5	225	26	5.78	179	92.3	99.8	108.7	94.2	104.2	100.8
Q6ZYL4	GTF2H5	General transcription factor IIH subunit 5 OS=Homo sapiens OX=9606 GN=GTF2H5 PE=1 SV=1	37	2	3	2	71	8	4.65	27	101.4	101.2	101	95.2	98.8	102.4
Q9Y5Y2	NUBP2	Cytosolic Fe-S cluster assembly factor NUBP2 OS=Homo sapiens OX=9606 GN=NUBP2 PE=1 SV=1	32	6	8	6	271	28.8	5.83	191	100.2	101.5	101.6	95	99.7	102.1
P10253	GAA	Lysosomal alpha-glucosidase OS=Homo sapiens OX=9606 GN=GAA PE=1 SV=4	6	4	5	4	952	105.3	6	72	99.4	102.1	91.3	106	97.6	103.6
Q9H9Y4	GPN2	GPN-loop GTPase 2 OS=Homo sapiens OX=9606 GN=GPN2 PE=1 SV=2	12	3	4	3	310	34.5	5.25	85	106.1	109	108.1	93	89.9	94
Q8TC44	POC1B	POC1 centriolar protein homolog B OS=Homo sapiens OX=9606 GN=POC1B PE=1 SV=1	2	1	1	1	478	53.6	7.24	18	102.3	97.4	103.7	99	90.2	107.3
Q8N884	CGAS	Cyclic GMP-AMP synthase OS=Homo sapiens OX=9606 GN=CGAS PE=1 SV=2	23	10	15	10	522	58.8	9.48	215	102.6	98	105.9	97.5	92	104
P48723	HSPA13	Heat shock 70 kDa protein 13 OS=Homo sapiens OX=9606 GN=HSPA13 PE=1 SV=1	8	3	3	3	471	51.9	5.76	62	103.5	102.3	99.5	101.7	95	98.1
Q9H000	MKRN2	Probable E3 ubiquitin-protein ligase makorin-2 OS=Homo sapiens OX=9606 GN=MKRN2 PE=1 SV=2	16	7	7	7	416	46.9	7.61	60	102.5	89.6	108	101.7	93.6	104.7
Q9UHB7	AFF4	AF4/FMR2 family member 4 OS=Homo sapiens OX=9606 GN=AFF4 PE=1 SV=1	3	2	2	2	1163	127.4	9.31	70	89.2	99.1	112.5	89.3	95.9	113.9
Q9UBC2	EPS15L1	Epidermal growth factor receptor substrate 15-like 1 OS=Homo sapiens OX=9606 GN=EPS15L1 PE=1 SV=1	39	26	35	26	864	94.2	5.11	879	102	100.9	102.6	98	97.6	99
Q92542	NCSTN	Nicastrin OS=Homo sapiens OX=9606 GN=NCSTN PE=1 SV=2	13	9	11	9	709	78.4	5.99	209	93.8	91.1	93.4	110	106.6	105
O15145	ARPC3	Actin-related protein 2/3 complex subunit 3 OS=Homo sapiens OX=9606 GN=ARPC3 PE=1 SV=3	40	8	12	8	178	20.5	8.59	196	103.9	113.4	103.3	93.6	94.3	91.4
Q96LT9	RNPC3	RNA-binding region-containing protein 3 OS=Homo sapiens OX=9606 GN=RNPC3 PE=1 SV=1	4	2	2	2	517	58.5	7.72	33	103	99.4	99.3	94.6	99.4	104.3
Q9UNQ0	ABCG2	Broad substrate specificity ATP-binding cassette transporter ABCG2 OS=Homo sapiens OX=9606 GN=ABCG2 PE=1 SV=3	2	1	1	1	655	72.3	8.69	0
Q96AG3	SLC25A46	Solute carrier family 25 member 46 OS=Homo sapiens OX=9606 GN=SLC25A46 PE=1 SV=1	6	1	1	1	418	46.1	7.43	65	109	93.9	100.2	91.9	89.1	115.8
Q92576	PHF3	PHD finger protein 3 OS=Homo sapiens OX=9606 GN=PHF3 PE=1 SV=3	8	16	17	16	2039	229.3	6.96	169	102.3	100.9	106.9	96.6	95.5	97.8
Q8TCZ2	CD99L2	CD99 antigen-like protein 2 OS=Homo sapiens OX=9606 GN=CD99L2 PE=1 SV=1	6	1	1	1	262	28	5.14	23	105.4	98.7	107.4	96.1	92.8	99.6
O95379	TNFAIP8	Tumor necrosis factor alpha-induced protein 8 OS=Homo sapiens OX=9606 GN=TNFAIP8 PE=1 SV=1	18	3	4	3	198	23	7.93	160	98.9	103.3	102	96.7	99.6	99.6
Q00169	PITPNA	Phosphatidylinositol transfer protein alpha isoform OS=Homo sapiens OX=9606 GN=PITPNA PE=1 SV=2	59	14	17	10	270	31.8	6.55	284	91.8	92.8	93.7	109.1	109.1	103.5
O94985	CLSTN1	Calsyntenin-1 OS=Homo sapiens OX=9606 GN=CLSTN1 PE=1 SV=1	2	2	2	2	981	109.7	4.91	36	96.4	102.3	94.6	101.7	99.9	105.1
Q9BSC4	NOL10	Nucleolar protein 10 OS=Homo sapiens OX=9606 GN=NOL10 PE=1 SV=1	23	13	13	13	688	80.3	8.46	272	106.2	101.9	106.3	92.5	94.9	98.2
Q13509	TUBB3	Tubulin beta-3 chain OS=Homo sapiens OX=9606 GN=TUBB3 PE=1 SV=2	53	20	135	4	450	50.4	4.93	3157	93	94.2	93.6	106	106.2	107.2
Q6NUM9	RETSAT	All-trans-retinol 13,14-reductase OS=Homo sapiens OX=9606 GN=RETSAT PE=1 SV=2	10	5	5	5	610	66.8	8.28	23	107.5	96	98.3	99.7	101.5	97.1
Q13283	G3BP1	Ras GTPase-activating protein-binding protein 1 OS=Homo sapiens OX=9606 GN=G3BP1 PE=1 SV=1	31	11	30	10	466	52.1	5.52	845	108.8	103.9	114	90.7	89.4	93.2
Q8WVC0	LEO1	RNA polymerase-associated protein LEO1 OS=Homo sapiens OX=9606 GN=LEO1 PE=1 SV=1	8	6	6	6	666	75.4	4.51	106	103.8	101.8	106.2	95.5	95.5	97.2
Q99523	SORT1	Sortilin OS=Homo sapiens OX=9606 GN=SORT1 PE=1 SV=3	3	2	2	2	831	92	5.74	29	90.3	90.7	90.9	117.9	103.3	106.9
Q17R31	TATDN3	Putative deoxyribonuclease TATDN3 OS=Homo sapiens OX=9606 GN=TATDN3 PE=1 SV=1	7	1	1	1	274	30.3	7.15	14
Q8N130	SLC34A3	Sodium-dependent phosphate transport protein 2C OS=Homo sapiens OX=9606 GN=SLC34A3 PE=1 SV=2	1	1	1	1	599	63.5	8.27	13
Q96BZ8	LENG1	Leukocyte receptor cluster member 1 OS=Homo sapiens OX=9606 GN=LENG1 PE=1 SV=1	3	1	1	1	264	30.5	9.69	25	100	103.8	103.3	95.9	100.6	96.5
Q8WUM0	NUP133	Nuclear pore complex protein Nup133 OS=Homo sapiens OX=9606 GN=NUP133 PE=1 SV=2	28	22	27	22	1156	128.9	5.1	636	101.6	103.7	102.6	97	97.2	97.9
P36404	ARL2	ADP-ribosylation factor-like protein 2 OS=Homo sapiens OX=9606 GN=ARL2 PE=1 SV=4	59	9	14	9	184	20.9	6.34	453	95.6	101.6	99.1	102	101.8	99.9
Q03154	ACY1	Aminoacylase-1 OS=Homo sapiens OX=9606 GN=ACY1 PE=1 SV=1	30	9	13	9	408	45.9	6.18	302	101.2	104.2	96.6	97	100.9	100
Q99615	DNAJC7	DnaJ homolog subfamily C member 7 OS=Homo sapiens OX=9606 GN=DNAJC7 PE=1 SV=2	56	27	36	27	494	56.4	6.96	719	101.4	100.6	108.8	95.3	97.4	96.6
Q86UK7	ZNF598	E3 ubiquitin-protein ligase ZNF598 OS=Homo sapiens OX=9606 GN=ZNF598 PE=1 SV=1	9	7	7	7	904	98.6	8.4	154	94.9	97	104.9	89.8	97.3	116.2
Q96FN4	CPNE2	Copine-2 OS=Homo sapiens OX=9606 GN=CPNE2 PE=1 SV=3	14	7	9	6	548	61.2	6.07	133	100	99.7	97.1	99.2	96.5	107.6
Q5MNZ9	WIPI1	WD repeat domain phosphoinositide-interacting protein 1 OS=Homo sapiens OX=9606 GN=WIPI1 PE=1 SV=3	4	2	2	2	446	48.6	6.6	27	91.8	95.3	92.4	110.3	104.4	105.8
Q17R98	ZNF827	Zinc finger protein 827 OS=Homo sapiens OX=9606 GN=ZNF827 PE=1 SV=1	1	1	1	1	1081	119.1	6.89	0	94.5	90.4	95.6	129.6	91.2	98.7
Q9UHR5	SAP30BP	SAP30-binding protein OS=Homo sapiens OX=9606 GN=SAP30BP PE=1 SV=1	29	8	9	8	308	33.9	4.84	184	101.1	100.9	102.7	97.9	98.4	99
O95551	TDP2	Tyrosyl-DNA phosphodiesterase 2 OS=Homo sapiens OX=9606 GN=TDP2 PE=1 SV=1	11	3	5	3	362	40.9	5.1	41	105	100.4	100.7	98.6	96	99.3
Q9UL15	BAG5	BAG family molecular chaperone regulator 5 OS=Homo sapiens OX=9606 GN=BAG5 PE=1 SV=1	27	8	13	8	447	51.2	6.05	346	98.9	99.6	100	100.5	98.7	102.3
O60343	TBC1D4	TBC1 domain family member 4 OS=Homo sapiens OX=9606 GN=TBC1D4 PE=1 SV=2	24	27	33	27	1298	146.5	7.01	783	99.9	97.6	98.2	102.5	101	100.7
Q9NSD9	FARSB	Phenylalanine--tRNA ligase beta subunit OS=Homo sapiens OX=9606 GN=FARSB PE=1 SV=3	50	26	40	26	589	66.1	6.84	718	102	102.7	98.9	99.5	99.6	97.2
Q9BXW7	HDHD5	Haloacid dehalogenase-like hydrolase domain-containing 5 OS=Homo sapiens OX=9606 GN=HDHD5 PE=1 SV=1	30	8	9	8	423	46.3	8.13	218	106.9	103.2	100.7	100.8	93.3	95.3
P51610	HCFC1	Host cell factor 1 OS=Homo sapiens OX=9606 GN=HCFC1 PE=1 SV=2	16	25	31	25	2035	208.6	7.46	517	103.7	105	102.6	96.1	97	95.6
Q9Y5M8	SRPRB	Signal recognition particle receptor subunit beta OS=Homo sapiens OX=9606 GN=SRPRB PE=1 SV=3	45	10	17	10	271	29.7	9.04	504	100.8	96.1	97.8	100.7	102.8	101.8
P11498	PC	Pyruvate carboxylase, mitochondrial OS=Homo sapiens OX=9606 GN=PC PE=1 SV=2	26	22	29	22	1178	129.6	6.84	672	95.3	100.8	95.6	103.7	101.3	103.4
P04792	HSPB1	Heat shock protein beta-1 OS=Homo sapiens OX=9606 GN=HSPB1 PE=1 SV=2	67	14	27	14	205	22.8	6.4	330	92.9	84.6	116.2	110.4	93.8	102.1
O00468	AGRN	Agrin OS=Homo sapiens OX=9606 GN=AGRN PE=1 SV=6	4	6	7	6	2068	217.2	6.39	227	102.7	107.5	102.7	98.3	92.7	96.1
Q9H3K6	BOLA2	BolA-like protein 2 OS=Homo sapiens OX=9606 GN=BOLA2 PE=1 SV=1	70	5	7	5	86	10.1	6.52	169	93.3	93.5	95.4	100	103.7	114.1
Q8IX01	SUGP2	SURP and G-patch domain-containing protein 2 OS=Homo sapiens OX=9606 GN=SUGP2 PE=1 SV=2	15	12	13	12	1082	120.1	7.28	324	101.1	96.6	100	100.1	97.1	105.1
Q86Y39	NDUFA11	NADH dehydrogenase [ubiquinone] 1 alpha subcomplex subunit 11 OS=Homo sapiens OX=9606 GN=NDUFA11 PE=1 SV=3	16	1	1	1	141	14.8	8.72	49	96.8	85.4	99.7	103.5	109.4	105.1
Q9Y2H1	STK38L	Serine/threonine-protein kinase 38-like OS=Homo sapiens OX=9606 GN=STK38L PE=1 SV=3	5	2	2	1	464	54	6.81	43	95.5	94.8	102.6	101.4	102.1	103.6
Q53SF7	COBLL1	Cordon-bleu protein-like 1 OS=Homo sapiens OX=9606 GN=COBLL1 PE=1 SV=3	3	3	3	3	1128	123.8	6.58	41	104.9	95.1	106.2	98.2	97.5	98.1
Q13217	DNAJC3	DnaJ homolog subfamily C member 3 OS=Homo sapiens OX=9606 GN=DNAJC3 PE=1 SV=1	47	21	26	21	504	57.5	6.15	550	95.4	96.3	95.7	103.3	105.7	103.6
Q7Z392	TRAPPC11	Trafficking protein particle complex subunit 11 OS=Homo sapiens OX=9606 GN=TRAPPC11 PE=1 SV=2	10	8	9	8	1133	128.8	7.14	209	97.3	95.6	93.5	104.3	103.4	105.8
Q9Y508	RNF114	E3 ubiquitin-protein ligase RNF114 OS=Homo sapiens OX=9606 GN=RNF114 PE=1 SV=1	38	6	8	6	228	25.7	7.25	179	105.2	106.4	106.7	92	94.3	95.4
A0AV96	RBM47	RNA-binding protein 47 OS=Homo sapiens OX=9606 GN=RBM47 PE=1 SV=2	5	2	2	2	593	64.1	7.68	67	108	114.1	102.6	95.7	89.5	90.1
P52179	MYOM1	Myomesin-1 OS=Homo sapiens OX=9606 GN=MYOM1 PE=1 SV=2	1	1	1	1	1685	187.5	6.93	26	105.1	116.5	103.1	89.1	91.7	94.5
Q96II8	LRCH3	DISP complex protein LRCH3 OS=Homo sapiens OX=9606 GN=LRCH3 PE=1 SV=2	11	6	6	5	777	86	6.71	109	96.8	98.3	93.9	106.4	99.9	104.6
Q86W50	METTL16	RNA N6-adenosine-methyltransferase METTL16 OS=Homo sapiens OX=9606 GN=METTL16 PE=1 SV=2	6	3	4	3	562	63.6	7.85	87	110.8	101.5	109.7	91.3	90	96.6
A2RU67	FAM234B	Protein FAM234B OS=Homo sapiens OX=9606 GN=FAM234B PE=1 SV=1	1	1	1	1	622	67	5.02	38	106.4	102.5	95.5	79.6	101.2	114.8
P51648	ALDH3A2	Aldehyde dehydrogenase family 3 member A2 OS=Homo sapiens OX=9606 GN=ALDH3A2 PE=1 SV=1	24	10	12	10	485	54.8	7.88	220	98.9	102.4	96.2	102.8	100.7	98.9
P17301	ITGA2	Integrin alpha-2 OS=Homo sapiens OX=9606 GN=ITGA2 PE=1 SV=1	29	22	28	22	1181	129.2	5.31	866	85.2	86.6	85	118.8	113.3	111
P09601	HMOX1	Heme oxygenase 1 OS=Homo sapiens OX=9606 GN=HMOX1 PE=1 SV=1	13	3	3	3	288	32.8	8.25	74	108.5	102.2	117.6	86.1	90.1	95.5
Q8IVV2	LOXHD1	Lipoxygenase homology domain-containing protein 1 OS=Homo sapiens OX=9606 GN=LOXHD1 PE=2 SV=4	2	2	2	2	2067	235.5	5.57	0
Q9BYK8	HELZ2	Helicase with zinc finger domain 2 OS=Homo sapiens OX=9606 GN=HELZ2 PE=1 SV=6	4	7	7	7	2649	294.5	7.49	100	94.4	97.3	99.8	99.5	101.9	107.1
Q9H4G4	GLIPR2	Golgi-associated plant pathogenesis-related protein 1 OS=Homo sapiens OX=9606 GN=GLIPR2 PE=1 SV=3	19	2	2	2	154	17.2	9.41	55	86	87	93.2	117.3	107.5	109
Q96PU8	QKI	Protein quaking OS=Homo sapiens OX=9606 GN=QKI PE=1 SV=1	21	5	5	5	341	37.6	8.56	69	95	87.6	92.4	117.2	104.9	102.8
Q96SW2	CRBN	Protein cereblon OS=Homo sapiens OX=9606 GN=CRBN PE=1 SV=1	14	5	5	5	442	50.5	5.63	76	84.5	89.4	91.4	116.1	107.7	110.9
O75131	CPNE3	Copine-3 OS=Homo sapiens OX=9606 GN=CPNE3 PE=1 SV=1	40	18	28	17	537	60.1	5.85	629	97	99.5	95.7	105.1	103	99.7
Q9NXH8	TOR4A	Torsin-4A OS=Homo sapiens OX=9606 GN=TOR4A PE=1 SV=2	2	1	1	1	423	46.9	9.94	0	96.3	96.1	102.3	103.8	96.9	104.6
P48960	CD97	CD97 antigen OS=Homo sapiens OX=9606 GN=CD97 PE=1 SV=4	28	16	28	16	835	91.8	6.87	691	99.6	99.1	95.4	100.5	101.9	103.4
P62070	RRAS2	Ras-related protein R-Ras2 OS=Homo sapiens OX=9606 GN=RRAS2 PE=1 SV=1	51	10	15	8	204	23.4	6.01	319	94.3	96.2	97.6	102.2	106.5	103.3
P67775	PPP2CA	Serine/threonine-protein phosphatase 2A catalytic subunit alpha isoform OS=Homo sapiens OX=9606 GN=PPP2CA PE=1 SV=1	66	15	25	1	309	35.6	5.54	714	101.6	98.5	100.3	99.1	102.9	97.7
P28290	ITPRID2	Protein ITPRID2 OS=Homo sapiens OX=9606 GN=ITPRID2 PE=1 SV=3	10	11	11	11	1259	138.3	5.19	248	97.1	95.5	93.6	105.1	101.6	107.1
P07550	ADRB2	Beta-2 adrenergic receptor OS=Homo sapiens OX=9606 GN=ADRB2 PE=1 SV=3	4	2	2	2	413	46.4	7.03	31	91	98	93.7	105.3	105.9	106.1
Q8NBX0	SCCPDH	Saccharopine dehydrogenase-like oxidoreductase OS=Homo sapiens OX=9606 GN=SCCPDH PE=1 SV=1	31	9	12	9	429	47.1	9.14	230	94.3	98.5	94	105.2	106.9	101.2
Q8TF01	PNISR	Arginine/serine-rich protein PNISR OS=Homo sapiens OX=9606 GN=PNISR PE=1 SV=2	1	1	1	1	805	92.5	10.02	0
Q9NSV4	DIAPH3	Protein diaphanous homolog 3 OS=Homo sapiens OX=9606 GN=DIAPH3 PE=1 SV=4	32	33	37	32	1193	136.8	7.03	687	101.1	87.2	105.1	113.8	93.9	98.8
Q9BWH2	FUNDC2	FUN14 domain-containing protein 2 OS=Homo sapiens OX=9606 GN=FUNDC2 PE=1 SV=2	13	3	3	3	189	20.7	9.73	49	83.5	85	91.7	114.5	111.2	114.1
Q8WV99	ZFAND2B	AN1-type zinc finger protein 2B OS=Homo sapiens OX=9606 GN=ZFAND2B PE=1 SV=1	6	2	3	2	257	28	6.92	27	99.1	92.7	95.8	110.5	101	100.8
Q92520	FAM3C	Protein FAM3C OS=Homo sapiens OX=9606 GN=FAM3C PE=1 SV=1	50	9	13	9	227	24.7	8.29	383	88.4	90.5	86.3	113.3	111.4	110
Q9C000	NLRP1	NACHT, LRR and PYD domains-containing protein 1 OS=Homo sapiens OX=9606 GN=NLRP1 PE=1 SV=1	1	2	3	2	1473	165.8	6.84	37	109.8	102.3	99.4	95.8	94.1	98.6
Q9UHY7	ENOPH1	Enolase-phosphatase E1 OS=Homo sapiens OX=9606 GN=ENOPH1 PE=1 SV=1	35	7	12	7	261	28.9	4.78	358	106	105.6	106.5	93.2	91.2	97.5
P56945	BCAR1	Breast cancer anti-estrogen resistance protein 1 OS=Homo sapiens OX=9606 GN=BCAR1 PE=1 SV=2	13	10	11	10	870	93.3	5.67	229	104.2	99.1	101.8	98.5	99	97.5
P06132	UROD	Uroporphyrinogen decarboxylase OS=Homo sapiens OX=9606 GN=UROD PE=1 SV=2	55	12	22	12	367	40.8	6.14	498	95.8	101	100.8	100.8	100.4	101.2
P39656	DDOST	Dolichyl-diphosphooligosaccharide--protein glycosyltransferase 48 kDa subunit OS=Homo sapiens OX=9606 GN=DDOST PE=1 SV=4	39	13	25	13	456	50.8	6.55	565	95.7	96.1	93.7	106.6	106.5	101.3
Q9NR31	SAR1A	GTP-binding protein SAR1a OS=Homo sapiens OX=9606 GN=SAR1A PE=1 SV=1	54	8	17	5	198	22.4	6.68	493	90.7	94.4	95.3	106.4	106.1	107.1
P62906	RPL10A	60S ribosomal protein L10a OS=Homo sapiens OX=9606 GN=RPL10A PE=1 SV=2	45	12	38	12	217	24.8	9.94	832	102.8	103.2	100.4	97	99.3	97.3
Q10589	BST2	Bone marrow stromal antigen 2 OS=Homo sapiens OX=9606 GN=BST2 PE=1 SV=1	19	3	4	3	180	19.8	5.6	77	91.9	102.2	97.7	99.1	102.3	106.8
Q8NCE0	TSEN2	tRNA-splicing endonuclease subunit Sen2 OS=Homo sapiens OX=9606 GN=TSEN2 PE=1 SV=2	4	2	2	2	465	53.2	7.85	41	106.4	98.2	104.1	95.3	97.3	98.7
Q9UK61	TASOR	Protein TASOR OS=Homo sapiens OX=9606 GN=TASOR PE=1 SV=3	6	10	10	10	1670	188.9	5.8	189	94.4	92.9	98	112.9	98.7	103
P49327	FASN	Fatty acid synthase OS=Homo sapiens OX=9606 GN=FASN PE=1 SV=3	51	96	205	95	2511	273.3	6.44	5134	99.8	107.9	105.3	94.8	97	95.1
O60573	EIF4E2	Eukaryotic translation initiation factor 4E type 2 OS=Homo sapiens OX=9606 GN=EIF4E2 PE=1 SV=1	7	1	1	1	245	28.3	8.88	0	91.1	91.2	95.4	116.2	106.1	100
Q8N2F6	ARMC10	Armadillo repeat-containing protein 10 OS=Homo sapiens OX=9606 GN=ARMC10 PE=1 SV=1	7	2	3	2	343	37.5	6.61	76	106.6	101.1	90.5	108.4	96.8	96.6
Q6DN03	HIST2H2BC	Putative histone H2B type 2-C OS=Homo sapiens OX=9606 GN=HIST2H2BC PE=5 SV=3	20	5	18	3	193	21.5	10.7	225	108.2	122.7	111.2	81.5	88.7	87.7
Q8N9C0	IGSF22	Immunoglobulin superfamily member 22 OS=Homo sapiens OX=9606 GN=IGSF22 PE=2 SV=2	1	1	1	1	903	100.3	7.12	0	104.3	99.1	97.9	96.1	92.8	109.7
Q9NZW5	MPP6	MAGUK p55 subfamily member 6 OS=Homo sapiens OX=9606 GN=MPP6 PE=1 SV=2	26	13	14	12	540	61.1	6.18	194	101.4	96.2	101.2	100.1	97.9	103.2
Q96HU1	SGSM3	Small G protein signaling modulator 3 OS=Homo sapiens OX=9606 GN=SGSM3 PE=1 SV=1	1	1	1	1	749	85.3	6	22	102.5	94.8	92.1	108.3	98.9	103.4
Q9UKR5	ERG28	Probable ergosterol biosynthetic protein 28 OS=Homo sapiens OX=9606 GN=ERG28 PE=1 SV=1	19	3	5	3	140	15.9	9.83	105	97	99.2	99.4	100.8	104.3	99.3
O94874	UFL1	E3 UFM1-protein ligase 1 OS=Homo sapiens OX=9606 GN=UFL1 PE=1 SV=2	35	22	27	21	794	89.5	6.79	581	100.3	97.3	97.5	101.3	101.4	102.1
Q96C23	GALM	Aldose 1-epimerase OS=Homo sapiens OX=9606 GN=GALM PE=1 SV=1	29	7	8	7	342	37.7	6.65	238	106.1	97.9	96.5	97.9	97.4	104.1
Q99836	MYD88	Myeloid differentiation primary response protein MyD88 OS=Homo sapiens OX=9606 GN=MYD88 PE=1 SV=1	26	6	7	6	296	33.2	6.15	181	95.4	95.2	95.8	105.2	105.1	103.4
Q9NXW2	DNAJB12	DnaJ homolog subfamily B member 12 OS=Homo sapiens OX=9606 GN=DNAJB12 PE=1 SV=5	12	4	4	3	375	41.8	8.69	94	93.2	91.5	101	106.2	105.9	102.2
Q7L5D6	GET4	Golgi to ER traffic protein 4 homolog OS=Homo sapiens OX=9606 GN=GET4 PE=1 SV=1	8	2	3	2	327	36.5	5.41	162	98.6	96.7	96.7	106.6	104.2	97.2
Q92879	CELF1	CUGBP Elav-like family member 1 OS=Homo sapiens OX=9606 GN=CELF1 PE=1 SV=2	27	12	19	10	486	52	8.46	276	103.7	98.7	101.9	96.8	101.1	97.8
Q9H8H2	DDX31	Probable ATP-dependent RNA helicase DDX31 OS=Homo sapiens OX=9606 GN=DDX31 PE=1 SV=2	2	2	2	2	851	94	9.99	34	115.3	96.8	112.7	101.1	86.1	88.1
Q9P107	GMIP	GEM-interacting protein OS=Homo sapiens OX=9606 GN=GMIP PE=1 SV=2	1	1	1	1	970	106.6	5.72	56	93.3	104.7	103.1	87.8	113.2	98
Q9NV96	TMEM30A	Cell cycle control protein 50A OS=Homo sapiens OX=9606 GN=TMEM30A PE=1 SV=1	11	3	4	3	361	40.7	8.59	74	101.1	99	103.1	106.1	95.6	95.1
Q9UPN6	SCAF8	SR-related and CTD-associated factor 8 OS=Homo sapiens OX=9606 GN=SCAF8 PE=1 SV=1	3	4	5	2	1271	140.4	8.29	85	105.2	98.3	105.6	96.4	97.6	97
Q9NZD2	GLTP	Glycolipid transfer protein OS=Homo sapiens OX=9606 GN=GLTP PE=1 SV=3	31	6	7	6	209	23.8	7.39	142	99.5	98.9	98.1	101.8	100.5	101.2
Q9NX61	TMEM161A	Transmembrane protein 161A OS=Homo sapiens OX=9606 GN=TMEM161A PE=1 SV=1	4	1	1	1	479	53.6	8.44	59	97.6	90.1	93.1	108	94.7	116.6
Q86XP3	DDX42	ATP-dependent RNA helicase DDX42 OS=Homo sapiens OX=9606 GN=DDX42 PE=1 SV=1	28	20	27	20	938	102.9	7.02	586	98.1	100.2	105.4	98.9	98.5	99
Q8N1B4	VPS52	Vacuolar protein sorting-associated protein 52 homolog OS=Homo sapiens OX=9606 GN=VPS52 PE=1 SV=1	14	7	7	7	723	82.2	5.99	216	99.3	97.2	95.7	103.7	102.7	101.4
P40189	IL6ST	Interleukin-6 receptor subunit beta OS=Homo sapiens OX=9606 GN=IL6ST PE=1 SV=2	3	2	2	2	918	103.5	5.95	77	95.6	88.5	93.9	122.4	100.1	99.4
Q13405	MRPL49	39S ribosomal protein L49, mitochondrial OS=Homo sapiens OX=9606 GN=MRPL49 PE=1 SV=1	35	5	8	5	166	19.2	9.45	157	100.6	96.4	99.9	100.9	103.1	99.2
Q9H269	VPS16	Vacuolar protein sorting-associated protein 16 homolog OS=Homo sapiens OX=9606 GN=VPS16 PE=1 SV=2	11	6	9	6	839	94.6	6.77	302	98.6	92.2	98.6	106.1	100.3	104.3
Q70CQ2	USP34	Ubiquitin carboxyl-terminal hydrolase 34 OS=Homo sapiens OX=9606 GN=USP34 PE=1 SV=2	2	5	5	5	3546	404	5.82	42	103.6	100	100.3	99.7	99.6	96.8
Q5T013	HYI	Putative hydroxypyruvate isomerase OS=Homo sapiens OX=9606 GN=HYI PE=1 SV=2	47	9	13	9	277	30.4	5.5	308	94.5	96.5	93.2	108.2	103.6	104
Q13151	HNRNPA0	Heterogeneous nuclear ribonucleoprotein A0 OS=Homo sapiens OX=9606 GN=HNRNPA0 PE=1 SV=1	44	12	25	10	305	30.8	9.29	472	109.3	102.1	106.4	95.9	94.6	91.8
P46098	HTR3A	5-hydroxytryptamine receptor 3A OS=Homo sapiens OX=9606 GN=HTR3A PE=1 SV=1	1	1	1	1	478	55.2	7.39	0	100.2	98.7	127.7	86.9	86	100.6
P42694	HELZ	Probable helicase with zinc finger domain OS=Homo sapiens OX=9606 GN=HELZ PE=1 SV=2	2	2	2	2	1942	218.8	7.42	116	98	101.5	92.6	104.7	97.4	105.7
Q9BSQ5	CCM2	Cerebral cavernous malformations 2 protein OS=Homo sapiens OX=9606 GN=CCM2 PE=1 SV=1	8	2	2	2	444	48.8	5.54	95	99.4	101.7	102.2	96.3	101	99.4
Q9P2S5	WRAP73	WD repeat-containing protein WRAP73 OS=Homo sapiens OX=9606 GN=WRAP73 PE=1 SV=1	2	1	1	1	460	51.6	6.81	13
O95081	AGFG2	Arf-GAP domain and FG repeat-containing protein 2 OS=Homo sapiens OX=9606 GN=AGFG2 PE=1 SV=2	4	1	1	1	481	48.9	9.11	27	97.8	102.3	102.9	98.6	97.8	100.6
Q9P2K3	RCOR3	REST corepressor 3 OS=Homo sapiens OX=9606 GN=RCOR3 PE=1 SV=2	13	5	7	2	495	55.5	8.27	148	97.6	101.9	102.5	103.3	95.3	99.3
Q8TEQ8	PIGO	GPI ethanolamine phosphate transferase 3 OS=Homo sapiens OX=9606 GN=PIGO PE=1 SV=3	1	1	1	1	1089	118.6	8.12	14	86.6	95	94.6	106.8	97	120
P38435	GGCX	Vitamin K-dependent gamma-carboxylase OS=Homo sapiens OX=9606 GN=GGCX PE=1 SV=2	2	1	1	1	758	87.5	8.02	31
P30043	BLVRB	Flavin reductase (NADPH) OS=Homo sapiens OX=9606 GN=BLVRB PE=1 SV=3	58	8	14	8	206	22.1	7.65	331	97.5	93.4	96.1	108.5	100.8	103.6
P49116	NR2C2	Nuclear receptor subfamily 2 group C member 2 OS=Homo sapiens OX=9606 GN=NR2C2 PE=1 SV=1	4	2	2	2	596	65.4	6.28	93	97.1	93.3	100.9	105.8	101	102
O60518	RANBP6	Ran-binding protein 6 OS=Homo sapiens OX=9606 GN=RANBP6 PE=1 SV=2	6	5	14	2	1105	124.6	5.01	314	100.8	94	95.6	108.9	99.1	101.7
P62487	POLR2G	DNA-directed RNA polymerase II subunit RPB7 OS=Homo sapiens OX=9606 GN=POLR2G PE=1 SV=1	6	1	1	1	172	19.3	5.54	21	110.1	103.3	108	93.6	94.2	90.9
Q99501	GAS2L1	GAS2-like protein 1 OS=Homo sapiens OX=9606 GN=GAS2L1 PE=1 SV=2	3	2	2	2	681	72.7	10.05	18	102.6	103.2	103.6	94.9	96.3	99.4
Q96HC4	PDLIM5	PDZ and LIM domain protein 5 OS=Homo sapiens OX=9606 GN=PDLIM5 PE=1 SV=5	47	20	27	20	596	63.9	8.21	646	94.3	93	99	103.6	105.2	104.9
Q8TCD1	C18orf32	UPF0729 protein C18orf32 OS=Homo sapiens OX=9606 GN=C18orf32 PE=3 SV=1	25	2	2	2	76	8.7	9.13	49	87.8	90.3	90.9	110.5	113.8	106.7
Q96T58	SPEN	Msx2-interacting protein OS=Homo sapiens OX=9606 GN=SPEN PE=1 SV=1	0	2	2	2	3664	402	7.64	34	103.4	99.1	109	94.1	98.3	96.2
P30405	PPIF	Peptidyl-prolyl cis-trans isomerase F, mitochondrial OS=Homo sapiens OX=9606 GN=PPIF PE=1 SV=1	52	10	19	8	207	22	9.38	223	100	97.6	97.1	98.6	105	101.7
Q8NEF9	SRFBP1	Serum response factor-binding protein 1 OS=Homo sapiens OX=9606 GN=SRFBP1 PE=1 SV=1	21	8	9	8	429	48.6	9.58	161	109	100.7	112.7	90.3	93.8	93.5
Q9UGU0	TCF20	Transcription factor 20 OS=Homo sapiens OX=9606 GN=TCF20 PE=1 SV=3	3	4	4	4	1960	211.6	9.04	20	91.6	96.4	101.4	106	101.6	103
P55145	MANF	Mesencephalic astrocyte-derived neurotrophic factor OS=Homo sapiens OX=9606 GN=MANF PE=1 SV=3	48	12	27	12	182	20.7	8.69	394	90.9	94.8	97.1	105.3	108.5	103.4
P30679	GNA15	Guanine nucleotide-binding protein subunit alpha-15 OS=Homo sapiens OX=9606 GN=GNA15 PE=1 SV=2	4	2	2	1	374	43.5	8.51	31	108	88.6	109.1	102.4	90.7	101.2
P55211	CASP9	Caspase-9 OS=Homo sapiens OX=9606 GN=CASP9 PE=1 SV=3	3	1	1	1	416	46.3	6.05	13	93.2	96.7	98.6	110.1	94.6	106.8
P61619	SEC61A1	Protein transport protein Sec61 subunit alpha isoform 1 OS=Homo sapiens OX=9606 GN=SEC61A1 PE=1 SV=2	15	8	12	8	476	52.2	8.06	249	99.2	101.4	96.7	100.8	102.5	99.4
Q96DR4	STARD4	StAR-related lipid transfer protein 4 OS=Homo sapiens OX=9606 GN=STARD4 PE=1 SV=1	13	2	3	2	205	23.5	5.3	119	97.2	101.5	108.2	100.5	95.9	96.6
Q7L7X3	TAOK1	Serine/threonine-protein kinase TAO1 OS=Homo sapiens OX=9606 GN=TAOK1 PE=1 SV=1	8	7	7	5	1001	116	7.65	76	92.6	98.2	105.7	101.7	99.9	101.8
P10109	FDX1	Adrenodoxin, mitochondrial OS=Homo sapiens OX=9606 GN=FDX1 PE=1 SV=1	29	5	5	5	184	19.4	5.83	116	83.4	87.6	106	112.4	103	107.7
Q96PE3	INPP4A	Inositol polyphosphate-4-phosphatase type I A OS=Homo sapiens OX=9606 GN=INPP4A PE=1 SV=1	4	3	4	3	977	109.9	6.96	130	101.4	101.7	105.4	100.4	93.2	97.9
O95714	HERC2	E3 ubiquitin-protein ligase HERC2 OS=Homo sapiens OX=9606 GN=HERC2 PE=1 SV=2	4	12	12	12	4834	526.9	6.28	137	98.6	96.7	98.7	99.7	101.2	105
Q8N4H5	TOMM5	Mitochondrial import receptor subunit TOM5 homolog OS=Homo sapiens OX=9606 GN=TOMM5 PE=1 SV=1	29	3	5	3	51	6	9.7	62	101.3	101.2	101.6	98.9	100	97
Q93034	CUL5	Cullin-5 OS=Homo sapiens OX=9606 GN=CUL5 PE=1 SV=4	33	25	38	25	780	90.9	7.94	750	101.3	104.4	100.7	94.8	96.5	102.2
Q7Z417	NUFIP2	Nuclear fragile X mental retardation-interacting protein 2 OS=Homo sapiens OX=9606 GN=NUFIP2 PE=1 SV=1	25	13	18	13	695	76.1	8.7	473	96.4	94.8	102.4	98.6	105.3	102.5
Q9NQX3	GPHN	Gephyrin OS=Homo sapiens OX=9606 GN=GPHN PE=1 SV=1	19	9	10	9	736	79.7	5.43	171	102	102.1	100.7	97.7	96.9	100.6
Q13522	PPP1R1A	Protein phosphatase 1 regulatory subunit 1A OS=Homo sapiens OX=9606 GN=PPP1R1A PE=1 SV=2	4	1	1	1	171	19	6.3	0
Q9UNX4	WDR3	WD repeat-containing protein 3 OS=Homo sapiens OX=9606 GN=WDR3 PE=1 SV=1	24	19	22	19	943	106	6.64	560	113.9	102.4	110.5	91.1	88.9	93.1
Q8NCN5	PDPR	Pyruvate dehydrogenase phosphatase regulatory subunit, mitochondrial OS=Homo sapiens OX=9606 GN=PDPR PE=1 SV=2	19	13	15	13	879	99.3	6.35	348	97.5	99.1	94.6	102.9	101.4	104.5
P02533	KRT14	Keratin, type I cytoskeletal 14 OS=Homo sapiens OX=9606 GN=KRT14 PE=1 SV=4	35	16	21	4	472	51.5	5.16	395	176.2	113.7	75.9	77.9	72.4	83.9
P36959	GMPR	GMP reductase 1 OS=Homo sapiens OX=9606 GN=GMPR PE=1 SV=1	13	4	7	2	345	37.4	7.06	89	103.1	96.5	96.9	102.7	97.7	103.2
O15056	SYNJ2	Synaptojanin-2 OS=Homo sapiens OX=9606 GN=SYNJ2 PE=1 SV=3	7	8	10	8	1496	165.4	7.34	184	96.5	98.8	98.4	103.5	98.8	104.1
Q00535	CDK5	Cyclin-dependent-like kinase 5 OS=Homo sapiens OX=9606 GN=CDK5 PE=1 SV=3	15	4	4	4	292	33.3	7.66	78	99.7	101.8	92.3	107.2	100.4	98.5
Q9NTG7	SIRT3	NAD-dependent protein deacetylase sirtuin-3, mitochondrial OS=Homo sapiens OX=9606 GN=SIRT3 PE=1 SV=2	3	1	1	1	399	43.5	8.7	47	97.3	101.1	96.2	102.5	96.5	106.4
Q9ULT8	HECTD1	E3 ubiquitin-protein ligase HECTD1 OS=Homo sapiens OX=9606 GN=HECTD1 PE=1 SV=3	17	31	35	31	2610	289.2	5.35	762	104.8	102.7	102.9	96.5	95.8	97.3
Q9UBE0	SAE1	SUMO-activating enzyme subunit 1 OS=Homo sapiens OX=9606 GN=SAE1 PE=1 SV=1	60	19	24	19	346	38.4	5.3	552	102.6	100.5	103.7	95.2	97.4	100.5
Q92870	APBB2	Amyloid-beta A4 precursor protein-binding family B member 2 OS=Homo sapiens OX=9606 GN=APBB2 PE=1 SV=3	6	3	3	3	758	83.3	6.1	52	93.6	106.2	94.6	98.1	93.6	113.9
O95059	RPP14	Ribonuclease P protein subunit p14 OS=Homo sapiens OX=9606 GN=RPP14 PE=1 SV=3	36	3	3	3	124	13.7	7.75	69	98.2	99.2	104.4	99	98.6	100.5
Q9Y263	PLAA	Phospholipase A-2-activating protein OS=Homo sapiens OX=9606 GN=PLAA PE=1 SV=2	39	25	39	25	795	87.1	6.37	897	100.1	98.5	98.2	102.1	100.8	100.3
Q9UGK3	STAP2	Signal-transducing adaptor protein 2 OS=Homo sapiens OX=9606 GN=STAP2 PE=1 SV=2	9	2	3	2	403	44.9	8.16	70	103.8	104.3	94.8	97.7	98	101.4
Q9UJX3	ANAPC7	Anaphase-promoting complex subunit 7 OS=Homo sapiens OX=9606 GN=ANAPC7 PE=1 SV=4	17	8	9	8	599	66.8	5.64	256	94.6	96.7	98.1	107.1	99	104.6
P82094	TMF1	TATA element modulatory factor OS=Homo sapiens OX=9606 GN=TMF1 PE=1 SV=2	8	8	8	8	1093	122.8	4.92	125	104.7	99.4	111.5	97.9	89.3	97.2
Q9Y6X5	ENPP4	Bis(5'-adenosyl)-triphosphatase ENPP4 OS=Homo sapiens OX=9606 GN=ENPP4 PE=1 SV=3	8	3	3	3	453	51.6	6.15	78	97.9	102.9	99.1	103.3	94.4	102.4
Q9UNH7	SNX6	Sorting nexin-6 OS=Homo sapiens OX=9606 GN=SNX6 PE=1 SV=1	50	23	29	22	406	46.6	6.16	520	96.3	97.2	96.8	106.1	103.5	100
Q15118	PDK1	[Pyruvate dehydrogenase (acetyl-transferring)] kinase isozyme 1, mitochondrial OS=Homo sapiens OX=9606 GN=PDK1 PE=1 SV=1	12	4	4	4	436	49.2	8.81	74	96.5	100.5	107.9	98.7	97.3	99
Q2NL82	TSR1	Pre-rRNA-processing protein TSR1 homolog OS=Homo sapiens OX=9606 GN=TSR1 PE=1 SV=1	28	19	24	19	804	91.8	7.42	453	107.4	101.2	109.3	93.4	93.5	95.1
O75676	RPS6KA4	Ribosomal protein S6 kinase alpha-4 OS=Homo sapiens OX=9606 GN=RPS6KA4 PE=1 SV=1	13	8	8	7	772	85.6	8.28	153	100.6	94.9	101.9	103.2	97.6	101.9
O75818	RPP40	Ribonuclease P protein subunit p40 OS=Homo sapiens OX=9606 GN=RPP40 PE=1 SV=3	2	1	1	1	363	41.8	6.67	15
Q99808	SLC29A1	Equilibrative nucleoside transporter 1 OS=Homo sapiens OX=9606 GN=SLC29A1 PE=1 SV=3	2	1	1	1	456	50.2	8.29	54	92.8	92.7	97.4	100.5	112.2	104.3
Q5T8P6	RBM26	RNA-binding protein 26 OS=Homo sapiens OX=9606 GN=RBM26 PE=1 SV=3	20	18	23	17	1007	113.5	9.16	454	103.9	100.9	103	97.4	98.5	96.3
Q9H9G7	AGO3	Protein argonaute-3 OS=Homo sapiens OX=9606 GN=AGO3 PE=1 SV=2	10	7	8	2	860	97.3	9.11	98	93.2	96.4	101.4	98.3	105.4	105.3
Q14674	ESPL1	Separin OS=Homo sapiens OX=9606 GN=ESPL1 PE=1 SV=3	2	3	3	3	2120	233	7.55	25	94.4	98	93.6	109.2	102.1	102.6
P36507	MAP2K2	Dual specificity mitogen-activated protein kinase kinase 2 OS=Homo sapiens OX=9606 GN=MAP2K2 PE=1 SV=1	31	12	23	7	400	44.4	6.55	421	97.3	99	97.7	103.8	102.3	99.9
Q5VT25	CDC42BPA	Serine/threonine-protein kinase MRCK alpha OS=Homo sapiens OX=9606 GN=CDC42BPA PE=1 SV=1	8	12	12	9	1732	197.2	6.58	161	96	96.9	98.5	99.9	99.9	108.8
Q9BVG8	KIFC3	Kinesin-like protein KIFC3 OS=Homo sapiens OX=9606 GN=KIFC3 PE=1 SV=4	1	1	2	1	833	92.7	7.69	49	99	94.5	107	96.7	99	103.8
Q86UY8	NT5DC3	5'-nucleotidase domain-containing protein 3 OS=Homo sapiens OX=9606 GN=NT5DC3 PE=1 SV=1	5	3	3	3	548	63.4	8.31	44	97.1	99.9	101.4	104.5	99	97.9
P46821	MAP1B	Microtubule-associated protein 1B OS=Homo sapiens OX=9606 GN=MAP1B PE=1 SV=2	40	75	124	75	2468	270.5	4.81	2971	81.3	82.3	82.5	121.6	118.7	113.6
O00429	DNM1L	Dynamin-1-like protein OS=Homo sapiens OX=9606 GN=DNM1L PE=1 SV=2	64	36	56	36	736	81.8	6.81	1406	99.1	103.7	100.8	97.5	100.9	97.9
Q14137	BOP1	Ribosome biogenesis protein BOP1 OS=Homo sapiens OX=9606 GN=BOP1 PE=1 SV=2	35	18	23	18	746	83.6	6.19	533	110.6	101.6	105.3	92.7	93.8	95.9
P63272	SUPT4H1	Transcription elongation factor SPT4 OS=Homo sapiens OX=9606 GN=SUPT4H1 PE=1 SV=1	23	2	2	2	117	13.2	8.06	30	101.2	98.9	100.5	99.3	97.2	102.9
Q13795	ARFRP1	ADP-ribosylation factor-related protein 1 OS=Homo sapiens OX=9606 GN=ARFRP1 PE=1 SV=1	34	5	6	5	201	22.6	7.56	150	103.1	102.9	100	93.9	103.6	96.5
Q9UGR2	ZC3H7B	Zinc finger CCCH domain-containing protein 7B OS=Homo sapiens OX=9606 GN=ZC3H7B PE=1 SV=2	4	2	2	2	977	109.8	7.25	27	101.4	95.1	114.7	94.3	99.8	94.7
Q9Y2R4	DDX52	Probable ATP-dependent RNA helicase DDX52 OS=Homo sapiens OX=9606 GN=DDX52 PE=1 SV=3	11	5	6	5	599	67.5	9.67	154	109.6	98.4	109.3	96.2	90.7	95.7
Q96AC1	FERMT2	Fermitin family homolog 2 OS=Homo sapiens OX=9606 GN=FERMT2 PE=1 SV=1	45	26	44	25	680	77.8	6.7	1075	103.1	101.2	100.1	96.3	99.6	99.6
Q96P11	NSUN5	Probable 28S rRNA (cytosine-C(5))-methyltransferase OS=Homo sapiens OX=9606 GN=NSUN5 PE=1 SV=2	34	11	13	11	429	46.7	8.62	303	105.9	100.3	113.7	90.8	93.9	95.4
Q9UNF1	MAGED2	Melanoma-associated antigen D2 OS=Homo sapiens OX=9606 GN=MAGED2 PE=1 SV=2	33	19	25	19	606	64.9	9.32	541	96.1	96.6	96.9	105.2	102.4	102.8
Q99747	NAPG	Gamma-soluble NSF attachment protein OS=Homo sapiens OX=9606 GN=NAPG PE=1 SV=1	35	11	14	11	312	34.7	5.41	283	95.1	93.7	97.4	106.9	104.3	102.6
P26640	VARS	Valine--tRNA ligase OS=Homo sapiens OX=9606 GN=VARS PE=1 SV=4	45	47	89	47	1264	140.4	7.59	1733	107.7	104.1	101.3	94.8	96.3	95.9
P61513	RPL37A	60S ribosomal protein L37a OS=Homo sapiens OX=9606 GN=RPL37A PE=1 SV=2	59	5	16	5	92	10.3	10.43	423	101.1	102	101.6	96.6	100.2	98.6
Q9Y617	PSAT1	Phosphoserine aminotransferase OS=Homo sapiens OX=9606 GN=PSAT1 PE=1 SV=2	58	18	31	18	370	40.4	7.66	624	119.3	101	107.1	88.3	93	91.3
Q15363	TMED2	Transmembrane emp24 domain-containing protein 2 OS=Homo sapiens OX=9606 GN=TMED2 PE=1 SV=1	35	7	22	7	201	22.7	5.17	441	93	97.9	94.6	104.8	106.1	103.7
P36508	ZNF76	Zinc finger protein 76 OS=Homo sapiens OX=9606 GN=ZNF76 PE=1 SV=2	4	3	3	1	570	61.8	6.05	26	125.4	118.3	90.3	85	82.1	98.9
O75116	ROCK2	Rho-associated protein kinase 2 OS=Homo sapiens OX=9606 GN=ROCK2 PE=1 SV=4	37	46	53	39	1388	160.8	6.02	837	99.8	103.1	99.7	98.4	100.2	98.8
O75394	MRPL33	39S ribosomal protein L33, mitochondrial OS=Homo sapiens OX=9606 GN=MRPL33 PE=1 SV=1	22	1	1	1	65	7.6	10.8	25
O75694	NUP155	Nuclear pore complex protein Nup155 OS=Homo sapiens OX=9606 GN=NUP155 PE=1 SV=1	35	34	51	34	1391	155.1	6.16	1118	104.4	103.7	102.7	95.1	97.1	96.9
O75815	BCAR3	Breast cancer anti-estrogen resistance protein 3 OS=Homo sapiens OX=9606 GN=BCAR3 PE=1 SV=1	6	4	4	4	825	92.5	7.96	49	97.3	97.2	116.4	103.5	91.6	94
Q01581	HMGCS1	Hydroxymethylglutaryl-CoA synthase, cytoplasmic OS=Homo sapiens OX=9606 GN=HMGCS1 PE=1 SV=2	39	17	23	17	520	57.3	5.41	425	103.5	100.7	117.8	91.1	90.8	96.1
Q86Y07	VRK2	Serine/threonine-protein kinase VRK2 OS=Homo sapiens OX=9606 GN=VRK2 PE=1 SV=3	4	2	2	2	508	58.1	8.84	28	103	97.7	99	108.1	85.2	107
Q99871	HAUS7	HAUS augmin-like complex subunit 7 OS=Homo sapiens OX=9606 GN=HAUS7 PE=1 SV=3	5	1	1	1	368	40.8	4.83	0
P78540	ARG2	Arginase-2, mitochondrial OS=Homo sapiens OX=9606 GN=ARG2 PE=1 SV=1	11	3	6	3	354	38.6	6.47	140	110.5	107.4	113.1	87.6	87.6	93.7
Q9UBP0	SPAST	Spastin OS=Homo sapiens OX=9606 GN=SPAST PE=1 SV=1	2	1	1	1	616	67.2	9.64	39	106.1	93.1	101.1	99.7	96.8	103.2
Q7L2H7	EIF3M	Eukaryotic translation initiation factor 3 subunit M OS=Homo sapiens OX=9606 GN=EIF3M PE=1 SV=1	45	15	28	15	374	42.5	5.63	711	103.3	103.6	108.7	91.8	96.5	96.1
Q92522	H1FX	Histone H1x OS=Homo sapiens OX=9606 GN=H1FX PE=1 SV=1	49	9	15	9	213	22.5	10.76	404	114.4	123.2	108.5	78.7	86.2	89.1
Q9BRJ6	C7orf50	Uncharacterized protein C7orf50 OS=Homo sapiens OX=9606 GN=C7orf50 PE=1 SV=1	33	5	8	5	194	22.1	9.64	209	97.8	101.8	102.1	97.4	103.5	97.4
P18615	NELFE	Negative elongation factor E OS=Homo sapiens OX=9606 GN=NELFE PE=1 SV=3	19	6	6	6	380	43.2	9.33	159	103.9	101.7	103.8	98.5	95.9	96.2
Q92989	CLP1	Polyribonucleotide 5'-hydroxyl-kinase Clp1 OS=Homo sapiens OX=9606 GN=CLP1 PE=1 SV=1	13	4	4	4	425	47.6	6.62	40	108.4	96.5	98.7	98.5	96.2	101.7
Q6Q759	SPAG17	Sperm-associated antigen 17 OS=Homo sapiens OX=9606 GN=SPAG17 PE=2 SV=1	1	2	2	2	2223	251.6	6.24	0	95.8	89	97.9	111.4	100.4	105.5
Q9P246	STIM2	Stromal interaction molecule 2 OS=Homo sapiens OX=9606 GN=STIM2 PE=1 SV=2	5	2	2	1	746	83.9	6.76	59
P25787	PSMA2	Proteasome subunit alpha type-2 OS=Homo sapiens OX=9606 GN=PSMA2 PE=1 SV=2	60	12	28	12	234	25.9	7.43	882	98.8	101.2	99.9	101.4	100.1	98.7
Q9H078	CLPB	Caseinolytic peptidase B protein homolog OS=Homo sapiens OX=9606 GN=CLPB PE=1 SV=1	25	13	16	13	707	78.7	9.01	311	100.6	101.6	100	101	97.6	99.2
O95819	MAP4K4	Mitogen-activated protein kinase kinase kinase kinase 4 OS=Homo sapiens OX=9606 GN=MAP4K4 PE=1 SV=2	18	18	20	11	1239	142	7.46	419	93.8	95.5	95.7	107	102.5	105.5
Q9H204	MED28	Mediator of RNA polymerase II transcription subunit 28 OS=Homo sapiens OX=9606 GN=MED28 PE=1 SV=1	5	1	1	1	178	19.5	5.58	28	104.9	102.8	104.3	94.6	95.8	97.5
Q15545	TAF7	Transcription initiation factor TFIID subunit 7 OS=Homo sapiens OX=9606 GN=TAF7 PE=1 SV=1	11	4	5	4	349	40.2	5.2	101	100.4	105.6	108	99	96.8	90.2
Q12824	SMARCB1	SWI/SNF-related matrix-associated actin-dependent regulator of chromatin subfamily B member 1 OS=Homo sapiens OX=9606 GN=SMARCB1 PE=1 SV=2	35	9	10	9	385	44.1	6.23	217	98.8	99.5	102.8	100.9	97.5	100.5
Q9Y484	WDR45	WD repeat domain phosphoinositide-interacting protein 4 OS=Homo sapiens OX=9606 GN=WDR45 PE=1 SV=1	18	6	6	6	360	39.8	7.14	66	97.6	94.8	92.8	104	106	104.8
O43765	SGTA	Small glutamine-rich tetratricopeptide repeat-containing protein alpha OS=Homo sapiens OX=9606 GN=SGTA PE=1 SV=1	29	9	15	9	313	34	4.87	296	101.9	99.1	103.6	98.3	98.6	98.5
Q8NI60	COQ8A	Atypical kinase COQ8A, mitochondrial OS=Homo sapiens OX=9606 GN=COQ8A PE=1 SV=1	5	3	4	3	647	71.9	6.99	54	108.5	107.3	101.7	90.4	92.4	99.6
Q9H987	SYNPO2L	Synaptopodin 2-like protein OS=Homo sapiens OX=9606 GN=SYNPO2L PE=2 SV=3	1	1	1	1	977	102.4	9.74	0	98.5	90	88.5	119.7	97.5	105.7
Q5SZD4	GLYATL3	Glycine N-acyltransferase-like protein 3 OS=Homo sapiens OX=9606 GN=GLYATL3 PE=2 SV=3	3	1	1	1	288	32.7	8.84	0
Q13637	RAB32	Ras-related protein Rab-32 OS=Homo sapiens OX=9606 GN=RAB32 PE=1 SV=3	48	9	16	8	225	25	6.54	476	91.6	88	90.3	110.4	108.2	111.4
Q8ND56	LSM14A	Protein LSM14 homolog A OS=Homo sapiens OX=9606 GN=LSM14A PE=1 SV=3	16	8	10	8	463	50.5	9.52	152	99.6	98	103.5	99	99.5	100.5
Q96SM3	CPXM1	Probable carboxypeptidase X1 OS=Homo sapiens OX=9606 GN=CPXM1 PE=2 SV=2	4	1	1	1	734	81.6	6.67	0
P08559	PDHA1	Pyruvate dehydrogenase E1 component subunit alpha, somatic form, mitochondrial OS=Homo sapiens OX=9606 GN=PDHA1 PE=1 SV=3	41	15	17	15	390	43.3	8.06	254	97.1	98.3	96.6	100.3	104.9	102.9
Q13200	PSMD2	26S proteasome non-ATPase regulatory subunit 2 OS=Homo sapiens OX=9606 GN=PSMD2 PE=1 SV=3	61	46	93	46	908	100.1	5.2	1962	103.1	99.3	102	97.1	101	97.4
Q9UBS0	RPS6KB2	Ribosomal protein S6 kinase beta-2 OS=Homo sapiens OX=9606 GN=RPS6KB2 PE=1 SV=2	18	6	6	5	482	53.4	7.34	96	102.9	99.7	97.5	98.5	99	102.3
O14734	ACOT8	Acyl-coenzyme A thioesterase 8 OS=Homo sapiens OX=9606 GN=ACOT8 PE=1 SV=1	31	7	8	7	319	35.9	7.56	126	95.9	98.3	93.8	105.8	102	104.2
Q9NQ29	LUC7L	Putative RNA-binding protein Luc7-like 1 OS=Homo sapiens OX=9606 GN=LUC7L PE=1 SV=1	35	12	18	6	371	43.7	9.92	492	103.1	103	105.3	91.3	98.5	98.7
P03905	MT-ND4	NADH-ubiquinone oxidoreductase chain 4 OS=Homo sapiens OX=9606 GN=MT-ND4 PE=1 SV=1	2	1	1	1	459	51.5	9.35	30	105.3	101.3	96.9	99.5	98.5	98.4
Q9H6E4	CCDC134	Coiled-coil domain-containing protein 134 OS=Homo sapiens OX=9606 GN=CCDC134 PE=1 SV=1	17	3	3	3	229	26.5	8.85	75	97.8	103.4	97.9	105.6	99.4	95.9
Q9NXA8	SIRT5	NAD-dependent protein deacylase sirtuin-5, mitochondrial OS=Homo sapiens OX=9606 GN=SIRT5 PE=1 SV=2	5	1	1	1	310	33.9	8.47	31	95.9	98.6	102.5	111.7	92.3	99
Q14247	CTTN	Src substrate cortactin OS=Homo sapiens OX=9606 GN=CTTN PE=1 SV=2	45	24	48	24	550	61.5	5.4	891	93.6	95.5	94.7	109.8	105.4	101
Q9H3H3	C11orf68	UPF0696 protein C11orf68 OS=Homo sapiens OX=9606 GN=C11orf68 PE=1 SV=3	24	5	6	5	292	31.4	6.32	151	97.9	99.2	99.8	96.2	99.9	107.1
P49591	SARS	Serine--tRNA ligase, cytoplasmic OS=Homo sapiens OX=9606 GN=SARS PE=1 SV=3	60	31	51	31	514	58.7	6.43	1045	101.1	92.6	93.7	105	105.2	102.5
P28288	ABCD3	ATP-binding cassette sub-family D member 3 OS=Homo sapiens OX=9606 GN=ABCD3 PE=1 SV=1	27	16	23	16	659	75.4	9.36	480	81.1	86.9	86.6	115.7	115.1	114.6
O95486	SEC24A	Protein transport protein Sec24A OS=Homo sapiens OX=9606 GN=SEC24A PE=1 SV=2	16	14	22	12	1093	119.7	7.66	494	96.2	96.7	99.2	104.4	100.9	102.6
Q9UPQ9	TNRC6B	Trinucleotide repeat-containing gene 6B protein OS=Homo sapiens OX=9606 GN=TNRC6B PE=1 SV=4	2	2	2	2	1833	193.9	6.76	25	92.8	88.3	96.7	101.7	102.6	117.9
P27708	CAD	CAD protein OS=Homo sapiens OX=9606 GN=CAD PE=1 SV=3	43	69	123	69	2225	242.8	6.46	3169	101.4	100.1	99.6	97.6	100.6	100.7
O95400	CD2BP2	CD2 antigen cytoplasmic tail-binding protein 2 OS=Homo sapiens OX=9606 GN=CD2BP2 PE=1 SV=1	25	5	5	5	341	37.6	4.61	102	92.4	96.5	101.3	99.5	105.5	104.7
Q96HQ2	CDKN2AIPNL	CDKN2AIP N-terminal-like protein OS=Homo sapiens OX=9606 GN=CDKN2AIPNL PE=1 SV=1	41	4	5	4	116	13.2	5	176	101.8	97.5	101.4	100.8	98.5	100
Q13137	CALCOCO2	Calcium-binding and coiled-coil domain-containing protein 2 OS=Homo sapiens OX=9606 GN=CALCOCO2 PE=1 SV=1	10	4	5	4	446	52.2	5.02	100	89.6	83.7	101.3	115.1	97.2	113
O75179	ANKRD17	Ankyrin repeat domain-containing protein 17 OS=Homo sapiens OX=9606 GN=ANKRD17 PE=1 SV=3	9	16	19	6	2603	274.1	6.52	456
Q6IEG0	SNRNP48	U11/U12 small nuclear ribonucleoprotein 48 kDa protein OS=Homo sapiens OX=9606 GN=SNRNP48 PE=1 SV=2	4	1	1	1	339	39.9	6.95	19	103	97.1	101.9	100.1	99.1	98.8
P36405	ARL3	ADP-ribosylation factor-like protein 3 OS=Homo sapiens OX=9606 GN=ARL3 PE=1 SV=2	86	12	18	12	182	20.4	7.24	511	94.3	101.8	95.3	102.5	101.3	104.8
Q5JTJ3	COA6	Cytochrome c oxidase assembly factor 6 homolog OS=Homo sapiens OX=9606 GN=COA6 PE=1 SV=1	34	4	5	4	125	14.1	8.25	140	98.7	93	96.4	109.8	99.6	102.4
Q8IVH2	FOXP4	Forkhead box protein P4 OS=Homo sapiens OX=9606 GN=FOXP4 PE=1 SV=1	3	1	1	1	680	73.4	6.4	45	93.1	97.8	109.3	95.4	98.9	105.5
Q6P6C2	ALKBH5	RNA demethylase ALKBH5 OS=Homo sapiens OX=9606 GN=ALKBH5 PE=1 SV=2	13	2	3	2	394	44.2	9.09	154	103.8	106.8	105.3	93.4	92.7	98
Q9H0C8	ILKAP	Integrin-linked kinase-associated serine/threonine phosphatase 2C OS=Homo sapiens OX=9606 GN=ILKAP PE=1 SV=1	18	6	6	6	392	42.9	7.09	150	105.4	106.4	109.6	93.6	92.1	92.8
O43399	TPD52L2	Tumor protein D54 OS=Homo sapiens OX=9606 GN=TPD52L2 PE=1 SV=2	77	16	38	16	206	22.2	5.36	755	100.5	102.5	106.4	95.5	96.6	98.6
Q92844	TANK	TRAF family member-associated NF-kappa-B activator OS=Homo sapiens OX=9606 GN=TANK PE=1 SV=2	22	6	7	6	425	47.8	5.68	81	84.6	90	91.2	113.4	108.6	112.1
P46939	UTRN	Utrophin OS=Homo sapiens OX=9606 GN=UTRN PE=1 SV=2	23	64	77	64	3433	394.2	5.33	1925	94.7	96	94.7	103.4	106	105.4
Q8IUC4	RHPN2	Rhophilin-2 OS=Homo sapiens OX=9606 GN=RHPN2 PE=1 SV=1	10	7	7	7	686	76.9	6.8	79	96.3	95.3	98.3	102.6	104	103.6
O15230	LAMA5	Laminin subunit alpha-5 OS=Homo sapiens OX=9606 GN=LAMA5 PE=1 SV=8	4	11	12	11	3695	399.5	7.02	238	101.1	97.4	96.3	102.7	99.6	103
O15121	DEGS1	Sphingolipid delta(4)-desaturase DES1 OS=Homo sapiens OX=9606 GN=DEGS1 PE=1 SV=1	5	1	2	1	323	37.8	7.46	76	97.1	104.3	101	108	96	93.6
P61081	UBE2M	NEDD8-conjugating enzyme Ubc12 OS=Homo sapiens OX=9606 GN=UBE2M PE=1 SV=1	46	9	16	9	183	20.9	7.69	273	101.1	102.7	101	97.2	100.1	97.9
Q9HC35	EML4	Echinoderm microtubule-associated protein-like 4 OS=Homo sapiens OX=9606 GN=EML4 PE=1 SV=3	23	19	21	19	981	108.8	6.4	435	98.9	101	100.2	99	101.4	99.4
P43353	ALDH3B1	Aldehyde dehydrogenase family 3 member B1 OS=Homo sapiens OX=9606 GN=ALDH3B1 PE=1 SV=1	3	1	1	1	468	51.8	7.62	0	101.7	96.7	100.1	103	93.2	105.2
Q96QU8	XPO6	Exportin-6 OS=Homo sapiens OX=9606 GN=XPO6 PE=1 SV=1	2	2	2	2	1125	128.8	6.35	83	104.6	103.5	104.9	98.4	93.8	94.9
O43665	RGS10	Regulator of G-protein signaling 10 OS=Homo sapiens OX=9606 GN=RGS10 PE=1 SV=3	53	10	22	10	181	21.2	7.49	702	105.8	100.5	103.5	97.1	97	96.1
Q86YZ3	HRNR	Hornerin OS=Homo sapiens OX=9606 GN=HRNR PE=1 SV=2	2	1	1	1	2850	282.2	10.04	0
Q9BZG1	RAB34	Ras-related protein Rab-34 OS=Homo sapiens OX=9606 GN=RAB34 PE=1 SV=1	38	8	17	8	259	29	7.88	537	103.8	100.4	98.2	96	103	98.5
Q15050	RRS1	Ribosome biogenesis regulatory protein homolog OS=Homo sapiens OX=9606 GN=RRS1 PE=1 SV=2	31	10	13	10	365	41.2	10.7	357	106.9	101.8	105.5	98	93.3	94.5
Q9GZR7	DDX24	ATP-dependent RNA helicase DDX24 OS=Homo sapiens OX=9606 GN=DDX24 PE=1 SV=1	29	22	28	22	859	96.3	9.06	573	104	99.6	101.8	101.9	96.3	96.5
Q9NY33	DPP3	Dipeptidyl peptidase 3 OS=Homo sapiens OX=9606 GN=DPP3 PE=1 SV=2	63	32	55	32	737	82.5	5.1	1752	95.2	99.7	93.5	105.4	104.4	101.8
Q14764	MVP	Major vault protein OS=Homo sapiens OX=9606 GN=MVP PE=1 SV=4	60	41	80	41	893	99.3	5.48	2268	85.8	88.6	84.2	117.2	112.4	111.8
Q9BSF4	TIMM29	Mitochondrial import inner membrane translocase subunit Tim29 OS=Homo sapiens OX=9606 GN=TIMM29 PE=1 SV=2	9	1	1	1	260	29.2	8.09	17
A0AUZ9	KANSL1L	KAT8 regulatory NSL complex subunit 1-like protein OS=Homo sapiens OX=9606 GN=KANSL1L PE=1 SV=2	1	1	1	1	987	112.2	8.44	20	97.7	78.7	99.8	123.8	102.4	97.7
Q9NPD8	UBE2T	Ubiquitin-conjugating enzyme E2 T OS=Homo sapiens OX=9606 GN=UBE2T PE=1 SV=1	22	4	4	4	197	22.5	7.99	45	101.1	91.1	123.5	109.4	84.9	90
Q8IUH3	RBM45	RNA-binding protein 45 OS=Homo sapiens OX=9606 GN=RBM45 PE=1 SV=1	7	2	3	2	476	53.5	7.17	87	102.3	104.9	93.8	96.5	101.7	100.8
P62328	TMSB4X	Thymosin beta-4 OS=Homo sapiens OX=9606 GN=TMSB4X PE=1 SV=2	77	6	18	4	44	5.1	5.06	103	74	117.1	99.8	105.2	105.8	98.1
Q9Y3R5	DOP1B	Protein dopey-2 OS=Homo sapiens OX=9606 GN=DOP1B PE=1 SV=5	1	2	2	2	2298	258.1	6.29	100	85.6	95.7	88.6	110.7	111.2	108.2
Q9HD64	XAGE1A	X antigen family member 1 OS=Homo sapiens OX=9606 GN=XAGE1A PE=1 SV=3	22	1	1	1	81	9.1	9.58	15
O15160	POLR1C	DNA-directed RNA polymerases I and III subunit RPAC1 OS=Homo sapiens OX=9606 GN=POLR1C PE=1 SV=1	20	5	6	5	346	39.2	5.5	275	107.6	91.2	110.4	100.8	93.1	96.9
Q14728	MFSD10	Major facilitator superfamily domain-containing protein 10 OS=Homo sapiens OX=9606 GN=MFSD10 PE=1 SV=1	9	4	5	4	455	48.3	9.6	137	102.3	100.6	97.1	97.5	98.5	104.1
Q9UHI6	DDX20	Probable ATP-dependent RNA helicase DDX20 OS=Homo sapiens OX=9606 GN=DDX20 PE=1 SV=2	22	13	16	13	824	92.2	6.95	221	103.3	100	102.3	97.8	96.2	100.4
O75528	TADA3	Transcriptional adapter 3 OS=Homo sapiens OX=9606 GN=TADA3 PE=1 SV=1	3	1	1	1	432	48.9	6.27	50	104.9	103.9	100.3	106.8	90.3	93.7
Q14790	CASP8	Caspase-8 OS=Homo sapiens OX=9606 GN=CASP8 PE=1 SV=1	43	14	20	14	479	55.4	5.1	668	102.4	91	94.9	112.8	101.1	97.7
Q86UE8	TLK2	Serine/threonine-protein kinase tousled-like 2 OS=Homo sapiens OX=9606 GN=TLK2 PE=1 SV=2	7	5	6	4	772	87.6	8.41	117	95.9	94.9	99.2	108.9	97.6	103.3
Q9H5V9	CXorf56	UPF0428 protein CXorf56 OS=Homo sapiens OX=9606 GN=CXorf56 PE=1 SV=1	9	2	2	2	222	25.6	8.73	32	102.2	109.8	116.9	86.3	92.6	92.2
P46109	CRKL	Crk-like protein OS=Homo sapiens OX=9606 GN=CRKL PE=1 SV=1	47	11	17	11	303	33.8	6.74	402	100.8	103.3	101.4	98.4	96.9	99.3
P15514	AREG	Amphiregulin OS=Homo sapiens OX=9606 GN=AREG PE=1 SV=2	4	1	1	1	252	27.9	7.4	21	89.2	91	91.8	111	105.2	111.8
Q8TDD2	SP7	Transcription factor Sp7 OS=Homo sapiens OX=9606 GN=SP7 PE=1 SV=1	6	1	1	1	431	45	8.38	0
O95470	SGPL1	Sphingosine-1-phosphate lyase 1 OS=Homo sapiens OX=9606 GN=SGPL1 PE=1 SV=3	27	13	15	13	568	63.5	9.16	351	95.6	95	94.7	104.8	105.5	104.3
P16333	NCK1	Cytoplasmic protein NCK1 OS=Homo sapiens OX=9606 GN=NCK1 PE=1 SV=1	20	9	10	7	377	42.8	6.47	141	99.8	101.9	101.2	100.1	98.5	98.5
Q9GZY4	COA1	Cytochrome c oxidase assembly factor 1 homolog OS=Homo sapiens OX=9606 GN=COA1 PE=1 SV=1	6	1	1	1	146	16.7	8.81	22
Q9HBH5	RDH14	Retinol dehydrogenase 14 OS=Homo sapiens OX=9606 GN=RDH14 PE=1 SV=1	26	5	5	5	336	36.8	8.79	203	99.8	100.6	96.2	101.8	98.8	102.9
Q5MNZ6	WDR45B	WD repeat domain phosphoinositide-interacting protein 3 OS=Homo sapiens OX=9606 GN=WDR45B PE=1 SV=2	21	6	8	5	344	38.1	7.59	162	94.4	95.5	98.9	104.9	103.8	102.5
P55283	CDH4	Cadherin-4 OS=Homo sapiens OX=9606 GN=CDH4 PE=2 SV=2	6	3	3	3	916	100.2	4.82	76	86.2	91.5	100.9	100.3	110.9	110.2
O95361	TRIM16	Tripartite motif-containing protein 16 OS=Homo sapiens OX=9606 GN=TRIM16 PE=1 SV=3	29	12	15	12	564	63.9	5.49	346	92.2	100.1	95.1	102.1	103.6	106.9
Q92947	GCDH	Glutaryl-CoA dehydrogenase, mitochondrial OS=Homo sapiens OX=9606 GN=GCDH PE=1 SV=1	8	3	3	3	438	48.1	8.06	58	105.4	103.2	102.3	96.1	96.5	96.5
Q8WVP7	LMBR1	Limb region 1 protein homolog OS=Homo sapiens OX=9606 GN=LMBR1 PE=1 SV=1	2	1	1	1	490	55.1	5.94	35	103.3	101.5	99.9	102.5	95.9	96.9
Q8WUA2	PPIL4	Peptidyl-prolyl cis-trans isomerase-like 4 OS=Homo sapiens OX=9606 GN=PPIL4 PE=1 SV=1	20	8	13	8	492	57.2	5.92	392	100.3	98.5	101.3	101.8	97.9	100.1
P49184	DNASE1L1	Deoxyribonuclease-1-like 1 OS=Homo sapiens OX=9606 GN=DNASE1L1 PE=1 SV=1	22	4	4	4	302	33.9	5.74	78	94.3	98.6	101.2	97	95.9	113
Q86V48	LUZP1	Leucine zipper protein 1 OS=Homo sapiens OX=9606 GN=LUZP1 PE=1 SV=2	16	15	17	15	1076	120.2	8.5	170	95.4	95.9	99.3	104.4	102	103
P07858	CTSB	Cathepsin B OS=Homo sapiens OX=9606 GN=CTSB PE=1 SV=3	27	7	10	7	339	37.8	6.3	255	84.5	85.8	84.7	124.7	109.9	110.4
Q99436	PSMB7	Proteasome subunit beta type-7 OS=Homo sapiens OX=9606 GN=PSMB7 PE=1 SV=1	43	8	25	8	277	29.9	7.68	890	98	100.3	99.4	99.5	103	99.7
Q9Y6I3	EPN1	Epsin-1 OS=Homo sapiens OX=9606 GN=EPN1 PE=1 SV=2	24	8	9	8	576	60.3	4.83	321	96.4	97.8	96.5	102.2	99	108.1
Q7RTV0	PHF5A	PHD finger-like domain-containing protein 5A OS=Homo sapiens OX=9606 GN=PHF5A PE=1 SV=1	63	7	9	7	110	12.4	8.41	191	102.1	106.7	103	94.6	97.2	96.3
Q15746	MYLK	Myosin light chain kinase, smooth muscle OS=Homo sapiens OX=9606 GN=MYLK PE=1 SV=4	5	9	12	8	1914	210.6	6.15	98	94.7	95.6	93.5	105.7	106.4	104.2
Q15858	SCN9A	Sodium channel protein type 9 subunit alpha OS=Homo sapiens OX=9606 GN=SCN9A PE=1 SV=3	1	1	1	1	1988	226.2	6.93	0	93.7	117.3	88.5	100.1	97.4	103.1
Q99735	MGST2	Microsomal glutathione S-transferase 2 OS=Homo sapiens OX=9606 GN=MGST2 PE=1 SV=1	10	1	1	1	147	16.6	9.55	0
Q6UW56	ATRAID	All-trans retinoic acid-induced differentiation factor OS=Homo sapiens OX=9606 GN=ATRAID PE=1 SV=2	3	1	1	1	229	24.7	7.25	36	91.4	96.4	91.3	104.5	105.4	111
O75052	NOS1AP	Carboxyl-terminal PDZ ligand of neuronal nitric oxide synthase protein OS=Homo sapiens OX=9606 GN=NOS1AP PE=1 SV=3	2	1	1	1	506	56.1	6.3	0	63.4	64.4	68.1	75.1	90.5	238.5
Q9ULJ7	ANKRD50	Ankyrin repeat domain-containing protein 50 OS=Homo sapiens OX=9606 GN=ANKRD50 PE=1 SV=4	1	1	1	1	1429	155.8	6.6	22	71.2	84.5	82.9	78.8	75.6	206.9
P46783	RPS10	40S ribosomal protein S10 OS=Homo sapiens OX=9606 GN=RPS10 PE=1 SV=1	48	10	32	10	165	18.9	10.15	492	101	103.7	102.2	96.6	96.4	100.1
Q6WCQ1	MPRIP	Myosin phosphatase Rho-interacting protein OS=Homo sapiens OX=9606 GN=MPRIP PE=1 SV=3	31	27	29	26	1025	116.5	6.21	480	101	100.7	99.3	100.2	98.7	100.1
Q9ULP9	TBC1D24	TBC1 domain family member 24 OS=Homo sapiens OX=9606 GN=TBC1D24 PE=1 SV=2	9	4	4	4	559	62.9	7.36	112	97.1	101.3	102.8	97.8	100.8	100.2
Q969E2	SCAMP4	Secretory carrier-associated membrane protein 4 OS=Homo sapiens OX=9606 GN=SCAMP4 PE=1 SV=1	28	3	5	3	229	25.7	8.82	116	90.7	97.4	81.8	111.9	112.3	106
P49770	EIF2B2	Translation initiation factor eIF-2B subunit beta OS=Homo sapiens OX=9606 GN=EIF2B2 PE=1 SV=3	29	8	12	8	351	39	6.16	389	98.1	98.9	103.5	100.2	99.1	100.2
Q13111	CHAF1A	Chromatin assembly factor 1 subunit A OS=Homo sapiens OX=9606 GN=CHAF1A PE=1 SV=3	4	4	4	4	956	106.8	5.94	92	86.4	98.4	124.8	86.8	103.4	100.2
Q9BQ69	MACROD1	ADP-ribose glycohydrolase MACROD1 OS=Homo sapiens OX=9606 GN=MACROD1 PE=1 SV=2	27	6	8	6	325	35.5	9.51	164	108.6	98.2	95.7	96.9	96.6	104
Q8N138	ORMDL3	ORM1-like protein 3 OS=Homo sapiens OX=9606 GN=ORMDL3 PE=1 SV=1	17	2	2	1	153	17.5	9.64	59
Q9BW61	DDA1	DET1- and DDB1-associated protein 1 OS=Homo sapiens OX=9606 GN=DDA1 PE=1 SV=1	12	1	2	1	102	11.8	8.68	33	93.4	95.5	104.8	107.3	98.3	100.6
Q16555	DPYSL2	Dihydropyrimidinase-related protein 2 OS=Homo sapiens OX=9606 GN=DPYSL2 PE=1 SV=1	55	20	34	20	572	62.3	6.38	965	96.9	110.5	100.6	94.5	99	98.5
Q8IWZ8	SUGP1	SURP and G-patch domain-containing protein 1 OS=Homo sapiens OX=9606 GN=SUGP1 PE=1 SV=2	4	2	3	2	645	72.4	7.61	60	93.3	93.4	99.5	101.1	98	114.6
P15954	COX7C	Cytochrome c oxidase subunit 7C, mitochondrial OS=Homo sapiens OX=9606 GN=COX7C PE=1 SV=1	29	2	4	2	63	7.2	10.27	79	100.7	97.3	99.1	103.6	100.3	99
Q02878	RPL6	60S ribosomal protein L6 OS=Homo sapiens OX=9606 GN=RPL6 PE=1 SV=3	55	19	39	19	288	32.7	10.58	441	102.1	104	104.7	92.8	99.7	96.7
Q9UL18	AGO1	Protein argonaute-1 OS=Homo sapiens OX=9606 GN=AGO1 PE=1 SV=3	16	9	10	4	857	97.2	9.16	170	99.7	99.5	96.5	103.9	99.1	101.3
P20336	RAB3A	Ras-related protein Rab-3A OS=Homo sapiens OX=9606 GN=RAB3A PE=1 SV=1	33	5	9	1	220	25	5.03	179	101.9	104	99.4	98.9	95	100.8
Q8N201	INTS1	Integrator complex subunit 1 OS=Homo sapiens OX=9606 GN=INTS1 PE=1 SV=2	6	11	12	11	2190	244.1	6.13	194	101.4	97.8	99.8	100.4	99.1	101.5
Q6VMQ6	ATF7IP	Activating transcription factor 7-interacting protein 1 OS=Homo sapiens OX=9606 GN=ATF7IP PE=1 SV=3	1	1	1	1	1270	136.3	4.7	0	95.1	87.3	98.8	85.8	89.9	143.2
P22061	PCMT1	Protein-L-isoaspartate(D-aspartate) O-methyltransferase OS=Homo sapiens OX=9606 GN=PCMT1 PE=1 SV=4	72	13	20	13	227	24.6	7.21	467	99.5	100	99.7	96.2	101.4	103.2
P61421	ATP6V0D1	V-type proton ATPase subunit d 1 OS=Homo sapiens OX=9606 GN=ATP6V0D1 PE=1 SV=1	48	13	16	13	351	40.3	5	326	95.2	97.7	98.9	102.9	103.9	101.5
Q96CW5	TUBGCP3	Gamma-tubulin complex component 3 OS=Homo sapiens OX=9606 GN=TUBGCP3 PE=1 SV=2	22	14	17	14	907	103.5	8.12	430	103.1	99.9	97.7	99.8	98.1	101.6
P61764	STXBP1	Syntaxin-binding protein 1 OS=Homo sapiens OX=9606 GN=STXBP1 PE=1 SV=1	25	12	20	12	594	67.5	6.96	472	98.8	99.6	100.6	100.5	100.5	100
Q96GG9	DCUN1D1	DCN1-like protein 1 OS=Homo sapiens OX=9606 GN=DCUN1D1 PE=1 SV=1	32	7	12	7	259	30.1	5.34	215	101.7	102.2	101.8	99.2	98.5	96.7
P15586	GNS	N-acetylglucosamine-6-sulfatase OS=Homo sapiens OX=9606 GN=GNS PE=1 SV=3	12	6	7	6	552	62	8.31	135	95.5	95.3	93.5	111.5	101.8	102.4
Q96JQ2	CLMN	Calmin OS=Homo sapiens OX=9606 GN=CLMN PE=1 SV=1	3	2	2	2	1002	111.6	4.94	46	95.1	97.3	101.6	105.4	94.7	105.9
P49903	SEPHS1	Selenide, water dikinase 1 OS=Homo sapiens OX=9606 GN=SEPHS1 PE=1 SV=2	34	8	12	8	392	42.9	5.97	373	100	98.3	100.3	100.8	100.3	100.4
O43294	TGFB1I1	Transforming growth factor beta-1-induced transcript 1 protein OS=Homo sapiens OX=9606 GN=TGFB1I1 PE=1 SV=2	3	1	1	1	461	49.8	7.03	22	93.7	101.6	102.9	97.7	103.6	100.5
Q6PJG2	ELMSAN1	ELM2 and SANT domain-containing protein 1 OS=Homo sapiens OX=9606 GN=ELMSAN1 PE=1 SV=2	3	3	3	3	1045	114.9	9.19	33	102.5	105.7	111.1	93.8	89.5	97.4
P11279	LAMP1	Lysosome-associated membrane glycoprotein 1 OS=Homo sapiens OX=9606 GN=LAMP1 PE=1 SV=3	18	7	10	7	417	44.9	8.75	224	102.8	102.2	100.8	101.3	98.7	94.3
O00161	SNAP23	Synaptosomal-associated protein 23 OS=Homo sapiens OX=9606 GN=SNAP23 PE=1 SV=1	56	9	14	9	211	23.3	5.01	313	90.9	91.8	98.2	106.9	105.3	106.9
Q9HB07	C12orf10	UPF0160 protein MYG1, mitochondrial OS=Homo sapiens OX=9606 GN=C12orf10 PE=1 SV=2	45	12	14	12	376	42.4	6.67	289	97.8	98.3	101.2	101.8	101.1	99.7
Q16270	IGFBP7	Insulin-like growth factor-binding protein 7 OS=Homo sapiens OX=9606 GN=IGFBP7 PE=1 SV=1	7	2	2	2	282	29.1	7.9	46	92	106	91.8	108.9	102.2	99
O75534	CSDE1	Cold shock domain-containing protein E1 OS=Homo sapiens OX=9606 GN=CSDE1 PE=1 SV=2	42	33	45	33	798	88.8	6.25	1000	103.7	101.3	108.4	96.4	95.4	95
Q13769	THOC5	THO complex subunit 5 homolog OS=Homo sapiens OX=9606 GN=THOC5 PE=1 SV=2	10	8	8	8	683	78.5	6.87	81	94.2	100.8	100.6	105.5	98.7	100.2
P50613	CDK7	Cyclin-dependent kinase 7 OS=Homo sapiens OX=9606 GN=CDK7 PE=1 SV=1	45	12	15	12	346	39	8.47	259	100.2	96.4	104.5	100.2	99.2	99.5
Q86VG3	C11orf74	Protein C11orf74 OS=Homo sapiens OX=9606 GN=C11orf74 PE=1 SV=1	10	1	3	1	221	25.4	4.51	0
Q9Y6G3	MRPL42	39S ribosomal protein L42, mitochondrial OS=Homo sapiens OX=9606 GN=MRPL42 PE=1 SV=1	11	1	1	1	142	16.7	8.35	32	100	97.3	100.5	104.6	91.3	106.3
Q63HN8	RNF213	E3 ubiquitin-protein ligase RNF213 OS=Homo sapiens OX=9606 GN=RNF213 PE=1 SV=3	6	29	33	29	5207	591	6.48	457	95.2	91.8	91.5	112.2	102	107.3
Q8NCF5	NFATC2IP	NFATC2-interacting protein OS=Homo sapiens OX=9606 GN=NFATC2IP PE=1 SV=1	11	3	3	3	419	45.8	6.6	81	93.4	87.2	97.3	106.2	108.7	107.2
Q8WUK0	PTPMT1	Phosphatidylglycerophosphatase and protein-tyrosine phosphatase 1 OS=Homo sapiens OX=9606 GN=PTPMT1 PE=1 SV=1	28	5	6	5	201	22.8	9.77	115	95.7	93.4	97.6	104.2	102.2	107
P36957	DLST	Dihydrolipoyllysine-residue succinyltransferase component of 2-oxoglutarate dehydrogenase complex, mitochondrial OS=Homo sapiens OX=9606 GN=DLST PE=1 SV=4	47	18	35	18	453	48.7	8.95	750	96.6	98.3	96.5	102.7	103.2	102.7
Q6IQ49	SDE2	Replication stress response regulator SDE2 OS=Homo sapiens OX=9606 GN=SDE2 PE=1 SV=1	10	5	7	5	451	49.7	6.05	108	108.6	101.3	110.3	90.9	91	97.9
Q9HBU6	ETNK1	Ethanolamine kinase 1 OS=Homo sapiens OX=9606 GN=ETNK1 PE=1 SV=1	3	1	1	1	452	50.9	6.54	0	102.4	97.5	105.7	96	95.4	103
Q7Z7K6	CENPV	Centromere protein V OS=Homo sapiens OX=9606 GN=CENPV PE=1 SV=1	13	2	3	2	275	29.9	9.73	75	102.4	104.9	103.1	90.7	96.8	102.1
Q9Y5V0	ZNF706	Zinc finger protein 706 OS=Homo sapiens OX=9606 GN=ZNF706 PE=1 SV=1	14	1	1	1	76	8.5	10.01	25	110.7	108.6	119.2	81.7	90.4	89.3
Q5T3J3	LRIF1	Ligand-dependent nuclear receptor-interacting factor 1 OS=Homo sapiens OX=9606 GN=LRIF1 PE=1 SV=1	3	1	1	1	769	84.5	9.72	21	100.1	91	99.5	103.9	95.4	110.1
P28676	GCA	Grancalcin OS=Homo sapiens OX=9606 GN=GCA PE=1 SV=2	20	4	6	4	217	24	5.21	148	93.3	92.9	91.1	109.2	104.2	109.3
Q99685	MGLL	Monoglyceride lipase OS=Homo sapiens OX=9606 GN=MGLL PE=1 SV=2	21	4	4	4	303	33.2	6.99	78	96.1	102.9	100.9	100.6	98.8	100.7
Q9C0D9	SELENOI	Ethanolaminephosphotransferase 1 OS=Homo sapiens OX=9606 GN=SELENOI PE=1 SV=3	4	1	3	1	397	45.2	6.6	150	106.9	102.1	101.9	101.1	89.7	98.3
Q96CV9	OPTN	Optineurin OS=Homo sapiens OX=9606 GN=OPTN PE=1 SV=3	43	22	29	22	577	65.9	5.17	504	90.4	93.3	89.8	115.2	105.8	105.5
Q9UBV8	PEF1	Peflin OS=Homo sapiens OX=9606 GN=PEF1 PE=1 SV=1	8	2	5	2	284	30.4	6.54	128	105.2	116.7	92.8	93.8	96.3	95.2
Q9UIF8	BAZ2B	Bromodomain adjacent to zinc finger domain protein 2B OS=Homo sapiens OX=9606 GN=BAZ2B PE=1 SV=3	1	1	1	1	2168	240.3	6.54	0
Q9BWW4	SSBP3	Single-stranded DNA-binding protein 3 OS=Homo sapiens OX=9606 GN=SSBP3 PE=1 SV=1	3	1	1	1	388	40.4	6.9	30	98.9	100.3	102.1	91.9	97.8	109.1
Q9UN86	G3BP2	Ras GTPase-activating protein-binding protein 2 OS=Homo sapiens OX=9606 GN=G3BP2 PE=1 SV=2	22	9	16	8	482	54.1	5.55	191	103.2	101.4	110.5	97.2	92.9	94.8
Q9BZZ5	API5	Apoptosis inhibitor 5 OS=Homo sapiens OX=9606 GN=API5 PE=1 SV=3	51	23	35	23	524	59	7.34	824	103.6	102.2	103.9	96.3	98	95.9
Q8WXE9	STON2	Stonin-2 OS=Homo sapiens OX=9606 GN=STON2 PE=1 SV=1	1	1	1	1	905	101.1	5.39	37	91.6	71.4	87.8	147.1	101.8	100.2
O75674	TOM1L1	TOM1-like protein 1 OS=Homo sapiens OX=9606 GN=TOM1L1 PE=1 SV=2	8	2	2	2	476	53	5.24	123	84.7	90.6	90.8	111.2	112.2	110.6
Q9UK39	NOCT	Nocturnin OS=Homo sapiens OX=9606 GN=NOCT PE=1 SV=2	15	4	4	4	431	48.2	7.23	84	107.6	101.6	112.7	88.1	92.6	97.4
Q9H0P0	NT5C3A	Cytosolic 5'-nucleotidase 3A OS=Homo sapiens OX=9606 GN=NT5C3A PE=1 SV=3	26	7	9	7	336	37.9	7.12	264	94.5	90.2	100.3	106.4	104.1	104.5
Q6P158	DHX57	Putative ATP-dependent RNA helicase DHX57 OS=Homo sapiens OX=9606 GN=DHX57 PE=1 SV=2	7	7	8	5	1386	155.5	7.71	173	95.5	95.8	93.6	102.5	106.1	106.5
Q9Y383	LUC7L2	Putative RNA-binding protein Luc7-like 2 OS=Homo sapiens OX=9606 GN=LUC7L2 PE=1 SV=2	42	17	26	11	392	46.5	10.01	579	102.7	101.3	101.7	96.2	98.4	99.6
Q9NX01	TXNL4B	Thioredoxin-like protein 4B OS=Homo sapiens OX=9606 GN=TXNL4B PE=1 SV=1	17	3	3	3	149	17	6	65	102.9	100.4	111.8	92.2	91.3	101.5
O43299	AP5Z1	AP-5 complex subunit zeta-1 OS=Homo sapiens OX=9606 GN=AP5Z1 PE=1 SV=2	2	1	1	1	807	88.5	7.01	76	111.1	92.4	94.4	105.8	95.4	100.9
O14617	AP3D1	AP-3 complex subunit delta-1 OS=Homo sapiens OX=9606 GN=AP3D1 PE=1 SV=1	33	31	44	31	1153	130.1	8.48	957	93.1	95.1	96	105.7	105.2	104.8
Q92968	PEX13	Peroxisomal membrane protein PEX13 OS=Homo sapiens OX=9606 GN=PEX13 PE=1 SV=2	2	1	1	1	403	44.1	8.05	27	89.5	91.6	95.7	113.6	100	109.5
P52789	HK2	Hexokinase-2 OS=Homo sapiens OX=9606 GN=HK2 PE=1 SV=2	36	29	35	26	917	102.3	6.05	798	112.1	102.4	109.5	93.9	85.1	96.9
Q12800	TFCP2	Alpha-globin transcription factor CP2 OS=Homo sapiens OX=9606 GN=TFCP2 PE=1 SV=2	8	3	4	3	502	57.2	5.8	109	94.1	98	103.4	106.2	101	97.2
Q3V6T2	CCDC88A	Girdin OS=Homo sapiens OX=9606 GN=CCDC88A PE=1 SV=2	10	17	19	16	1871	215.9	6.21	370	92.9	93.3	98.2	106.6	103.6	105.3
Q9H2P0	ADNP	Activity-dependent neuroprotector homeobox protein OS=Homo sapiens OX=9606 GN=ADNP PE=1 SV=1	12	11	12	11	1102	123.5	7.34	132	108	98.6	101.3	99.9	95.6	96.6
Q13901	C1D	Nuclear nucleic acid-binding protein C1D OS=Homo sapiens OX=9606 GN=C1D PE=1 SV=1	11	2	3	2	141	16	9.03	27	104.8	104.7	102.5	95.5	96.2	96.2
E9PRG8	C11orf98	Uncharacterized protein C11orf98 OS=Homo sapiens OX=9606 GN=C11orf98 PE=4 SV=2	17	2	3	2	123	14.2	11.53	116	107.3	98.9	113.3	97	91.1	92.5
P25786	PSMA1	Proteasome subunit alpha type-1 OS=Homo sapiens OX=9606 GN=PSMA1 PE=1 SV=1	75	20	45	20	263	29.5	6.61	902	98.5	99.1	97.9	100.9	101.1	102.5
O95476	CTDNEP1	CTD nuclear envelope phosphatase 1 OS=Homo sapiens OX=9606 GN=CTDNEP1 PE=1 SV=2	4	1	1	1	244	28.4	9.76	22	88.5	96.5	99.1	103.2	101.4	111.3
Q8ND04	SMG8	Protein SMG8 OS=Homo sapiens OX=9606 GN=SMG8 PE=1 SV=1	10	7	7	7	991	109.6	7.68	72	100.7	95.1	101.6	102.1	100.3	100.1
Q9H4B7	TUBB1	Tubulin beta-1 chain OS=Homo sapiens OX=9606 GN=TUBB1 PE=1 SV=1	16	8	25	2	451	50.3	5.17	217	92	99	91.1	107	100.8	110.1
Q9BPX5	ARPC5L	Actin-related protein 2/3 complex subunit 5-like protein OS=Homo sapiens OX=9606 GN=ARPC5L PE=1 SV=1	63	7	12	6	153	16.9	6.6	221	96.5	98.3	99.2	100.3	102.6	103.1
Q9UEU0	VTI1B	Vesicle transport through interaction with t-SNAREs homolog 1B OS=Homo sapiens OX=9606 GN=VTI1B PE=1 SV=3	33	6	6	6	232	26.7	9.04	178	96.6	96.7	107.9	99.5	99.9	99.5
Q9UBT2	UBA2	SUMO-activating enzyme subunit 2 OS=Homo sapiens OX=9606 GN=UBA2 PE=1 SV=2	37	18	23	18	640	71.2	5.29	606	102.9	100	102.5	97.5	98.8	98.3
Q9NQ48	LZTFL1	Leucine zipper transcription factor-like protein 1 OS=Homo sapiens OX=9606 GN=LZTFL1 PE=1 SV=1	36	9	11	9	299	34.6	5.36	282	98.8	99.8	98.6	100.3	99.9	102.6
P98160	HSPG2	Basement membrane-specific heparan sulfate proteoglycan core protein OS=Homo sapiens OX=9606 GN=HSPG2 PE=1 SV=4	3	11	12	11	4391	468.5	6.51	179	99.9	99.5	97.7	103.2	98.5	101.2
Q8NF91	SYNE1	Nesprin-1 OS=Homo sapiens OX=9606 GN=SYNE1 PE=1 SV=4	0	2	2	2	8797	1010.5	5.53	17	91	89.5	89.6	81.8	88.3	159.8
P60002	ELOF1	Transcription elongation factor 1 homolog OS=Homo sapiens OX=9606 GN=ELOF1 PE=1 SV=1	22	1	1	1	83	9.5	8	61	94.1	97.1	98.6	109.1	102.6	98.6
Q9NVT9	ARMC1	Armadillo repeat-containing protein 1 OS=Homo sapiens OX=9606 GN=ARMC1 PE=1 SV=1	10	3	4	3	282	31.3	5.74	121	103.7	102.4	101.7	94	97.6	100.6
P61962	DCAF7	DDB1- and CUL4-associated factor 7 OS=Homo sapiens OX=9606 GN=DCAF7 PE=1 SV=1	18	5	8	5	342	38.9	5.52	290	102.5	99.5	104.7	97.7	96.3	99.3
P11233	RALA	Ras-related protein Ral-A OS=Homo sapiens OX=9606 GN=RALA PE=1 SV=1	57	11	18	6	206	23.6	7.11	390	95.7	99.6	97.5	102.9	104.4	99.8
Q86TU7	SETD3	Actin-histidine N-methyltransferase OS=Homo sapiens OX=9606 GN=SETD3 PE=1 SV=1	27	14	17	14	594	67.2	5.96	349	99.4	100.4	100.7	99.3	100.2	100
Q15334	LLGL1	Lethal(2) giant larvae protein homolog 1 OS=Homo sapiens OX=9606 GN=LLGL1 PE=1 SV=3	9	8	9	8	1064	115.3	6.29	146	112.6	111	105.2	90.2	90.2	90.8
P59998	ARPC4	Actin-related protein 2/3 complex subunit 4 OS=Homo sapiens OX=9606 GN=ARPC4 PE=1 SV=3	64	10	21	10	168	19.7	8.43	313	96.1	98.2	96.2	103.6	103.9	101.9
Q6NSJ5	LRRC8E	Volume-regulated anion channel subunit LRRC8E OS=Homo sapiens OX=9606 GN=LRRC8E PE=1 SV=2	6	4	4	4	796	90.2	6.96	89	91.1	97.3	107.7	98.2	105.4	100.2
Q9UBB5	MBD2	Methyl-CpG-binding domain protein 2 OS=Homo sapiens OX=9606 GN=MBD2 PE=1 SV=1	15	6	7	6	411	43.2	10.04	211	98	101.9	102.3	99.1	96.5	102.3
Q9NWH9	SLTM	SAFB-like transcription modulator OS=Homo sapiens OX=9606 GN=SLTM PE=1 SV=2	16	13	16	13	1034	117.1	7.87	227	97.2	97.1	102.8	99.5	100.7	102.7
Q04637	EIF4G1	Eukaryotic translation initiation factor 4 gamma 1 OS=Homo sapiens OX=9606 GN=EIF4G1 PE=1 SV=4	41	62	114	55	1599	175.4	5.33	2232	104.4	101.2	102	96.4	98.7	97.4
P61086	UBE2K	Ubiquitin-conjugating enzyme E2 K OS=Homo sapiens OX=9606 GN=UBE2K PE=1 SV=3	60	8	19	8	200	22.4	5.44	460	101.1	100.3	99.4	101.4	100.4	97.5
Q15554	TERF2	Telomeric repeat-binding factor 2 OS=Homo sapiens OX=9606 GN=TERF2 PE=1 SV=3	13	5	6	5	542	59.6	9.35	182	101.4	101.3	104.4	96.7	97.8	98.4
P14859	POU2F1	POU domain, class 2, transcription factor 1 OS=Homo sapiens OX=9606 GN=POU2F1 PE=1 SV=2	8	3	3	3	743	76.4	6.81	123	105.7	103	103.9	95.2	96.1	96.1
Q9NRN7	AASDHPPT	L-aminoadipate-semialdehyde dehydrogenase-phosphopantetheinyl transferase OS=Homo sapiens OX=9606 GN=AASDHPPT PE=1 SV=2	44	12	20	12	309	35.8	6.8	226	109	107.2	107.8	92.5	91.3	92.1
Q8IVG5	SAMD9L	Sterile alpha motif domain-containing protein 9-like OS=Homo sapiens OX=9606 GN=SAMD9L PE=1 SV=2	1	1	1	1	1584	184.4	8.02	28	90.3	86	107.2	94.9	88.6	133.1
O75629	CREG1	Protein CREG1 OS=Homo sapiens OX=9606 GN=CREG1 PE=1 SV=1	10	1	1	1	220	24.1	7.59	36	103.4	107.7	101	103.8	87.2	97
Q05397	PTK2	Focal adhesion kinase 1 OS=Homo sapiens OX=9606 GN=PTK2 PE=1 SV=2	16	15	21	14	1052	119.2	6.62	461	101.8	99.4	98.3	101.8	100.1	98.6
Q8WZA0	LZIC	Protein LZIC OS=Homo sapiens OX=9606 GN=LZIC PE=1 SV=1	41	6	9	6	190	21.5	4.94	160	101.4	102.7	102.3	99.9	97.2	96.6
Q9H2C0	GAN	Gigaxonin OS=Homo sapiens OX=9606 GN=GAN PE=1 SV=1	19	8	10	8	597	67.6	5.85	205	92.3	85.6	90	110.5	109.8	111.8
P42224	STAT1	Signal transducer and activator of transcription 1-alpha/beta OS=Homo sapiens OX=9606 GN=STAT1 PE=1 SV=2	42	29	41	29	750	87.3	6.05	624	97.5	96	97.2	105.2	101.2	102.8
O15460	P4HA2	Prolyl 4-hydroxylase subunit alpha-2 OS=Homo sapiens OX=9606 GN=P4HA2 PE=1 SV=1	30	11	15	11	535	60.9	5.71	364	88.9	96.2	92.6	110.5	105.8	105.9
O75390	CS	Citrate synthase, mitochondrial OS=Homo sapiens OX=9606 GN=CS PE=1 SV=2	39	15	33	15	466	51.7	8.32	711	107.1	109.6	105.7	91.3	93.8	92.3
O95352	ATG7	Ubiquitin-like modifier-activating enzyme ATG7 OS=Homo sapiens OX=9606 GN=ATG7 PE=1 SV=1	18	10	10	10	703	77.9	6.24	202	94.6	93	93.9	109.9	104.5	104.1
P11182	DBT	Lipoamide acyltransferase component of branched-chain alpha-keto acid dehydrogenase complex, mitochondrial OS=Homo sapiens OX=9606 GN=DBT PE=1 SV=3	18	8	9	8	482	53.5	8.51	111	91.7	93.2	94.9	104.5	106.1	109.6
Q14457	BECN1	Beclin-1 OS=Homo sapiens OX=9606 GN=BECN1 PE=1 SV=2	6	3	3	3	450	51.9	4.89	37	100.9	95.4	101.9	100.3	98.9	102.7
Q9NSY0	NRBP2	Nuclear receptor-binding protein 2 OS=Homo sapiens OX=9606 GN=NRBP2 PE=1 SV=2	4	1	2	1	501	57.8	6.49	51	94.5	106.4	98.3	94	98.2	108.6
Q92828	CORO2A	Coronin-2A OS=Homo sapiens OX=9606 GN=CORO2A PE=1 SV=2	14	6	6	6	525	59.7	8.05	116	95.6	98.7	98.2	102.2	103.3	101.9
Q15007	WTAP	Pre-mRNA-splicing regulator WTAP OS=Homo sapiens OX=9606 GN=WTAP PE=1 SV=2	14	5	7	5	396	44.2	5.19	181	103.5	100.3	106.5	94.8	96.8	98.2
Q9UPQ7	PDZRN3	E3 ubiquitin-protein ligase PDZRN3 OS=Homo sapiens OX=9606 GN=PDZRN3 PE=1 SV=2	3	1	2	1	1066	119.5	6.02	0
O95402	MED26	Mediator of RNA polymerase II transcription subunit 26 OS=Homo sapiens OX=9606 GN=MED26 PE=1 SV=2	2	1	1	1	600	65.4	9.16	50	93.5	114	121.2	81	98.6	91.8
Q8NEY1	NAV1	Neuron navigator 1 OS=Homo sapiens OX=9606 GN=NAV1 PE=1 SV=2	4	5	5	4	1877	202.3	8.07	27	100.1	97.2	96.1	101.4	99.6	105.5
Q8IYB3	SRRM1	Serine/arginine repetitive matrix protein 1 OS=Homo sapiens OX=9606 GN=SRRM1 PE=1 SV=2	12	7	9	7	904	102.3	11.84	257	108.1	109.3	104.2	89	94.7	94.8
Q12872	SFSWAP	Splicing factor, suppressor of white-apricot homolog OS=Homo sapiens OX=9606 GN=SFSWAP PE=1 SV=3	10	9	9	9	951	104.8	8.05	95	102.2	103.1	104	94.3	97.3	99
Q9BZF3	OSBPL6	Oxysterol-binding protein-related protein 6 OS=Homo sapiens OX=9606 GN=OSBPL6 PE=1 SV=1	16	13	15	12	934	106.2	6.93	251	95.2	93.6	96.6	109.3	100.7	104.6
Q8TAD4	SLC30A5	Zinc transporter 5 OS=Homo sapiens OX=9606 GN=SLC30A5 PE=1 SV=1	3	1	1	1	765	84	7.31	0	97.7	98	97	104.6	104.7	97.9
Q99536	VAT1	Synaptic vesicle membrane protein VAT-1 homolog OS=Homo sapiens OX=9606 GN=VAT1 PE=1 SV=2	46	13	32	13	393	41.9	6.29	890	91.9	94.8	90.5	110.4	108	104.3
O95456	PSMG1	Proteasome assembly chaperone 1 OS=Homo sapiens OX=9606 GN=PSMG1 PE=1 SV=1	37	8	11	8	288	32.8	7.17	158	103.8	105.2	102.9	94.1	95.7	98.2
Q13740	ALCAM	CD166 antigen OS=Homo sapiens OX=9606 GN=ALCAM PE=1 SV=2	44	20	41	20	583	65.1	6.25	757	100.1	98.3	105.4	101.6	98.5	96.1
P02656	APOC3	Apolipoprotein C-III OS=Homo sapiens OX=9606 GN=APOC3 PE=1 SV=1	16	1	1	1	99	10.8	5.41	69	90.6	98.8	105.1	97	104	104.5
Q16698	DECR1	2,4-dienoyl-CoA reductase, mitochondrial OS=Homo sapiens OX=9606 GN=DECR1 PE=1 SV=1	44	13	20	13	335	36	9.28	419	90	92	88.2	111.5	108.1	110.1
Q15046	KARS1	Lysine--tRNA ligase OS=Homo sapiens OX=9606 GN=KARS1 PE=1 SV=3	48	30	62	30	597	68	6.35	1009	106.9	105.1	106.4	91.2	95.6	94.9
Q60I27	ALS2CL	ALS2 C-terminal-like protein OS=Homo sapiens OX=9606 GN=ALS2CL PE=1 SV=1	3	2	2	2	953	107.7	6.15	37
P54819	AK2	Adenylate kinase 2, mitochondrial OS=Homo sapiens OX=9606 GN=AK2 PE=1 SV=2	46	10	18	10	239	26.5	7.81	587	110	103.3	100.4	96	96.7	93.6
O95169	NDUFB8	NADH dehydrogenase [ubiquinone] 1 beta subcomplex subunit 8, mitochondrial OS=Homo sapiens OX=9606 GN=NDUFB8 PE=1 SV=1	6	1	1	1	186	21.8	6.8	29	95.9	99.2	98.7	101.7	104	100.4
Q9Y4C2	TCAF1	TRPM8 channel-associated factor 1 OS=Homo sapiens OX=9606 GN=TCAF1 PE=1 SV=3	14	8	8	8	921	102.1	6.54	124	99.7	91.4	110.2	105.5	93.5	99.8
P31150	GDI1	Rab GDP dissociation inhibitor alpha OS=Homo sapiens OX=9606 GN=GDI1 PE=1 SV=2	61	21	45	12	447	50.6	5.14	1193	97.9	106.1	104.9	97.2	97.3	96.5
Q14012	CAMK1	Calcium/calmodulin-dependent protein kinase type 1 OS=Homo sapiens OX=9606 GN=CAMK1 PE=1 SV=1	24	6	9	3	370	41.3	5.29	224	96.3	100.1	93.7	100.8	103.5	105.6
Q8IUD2	ERC1	ELKS/Rab6-interacting/CAST family member 1 OS=Homo sapiens OX=9606 GN=ERC1 PE=1 SV=1	21	20	25	20	1116	128	5.97	513	97.6	98.3	103.6	99.5	99.4	101.5
P0DPB5	POLR1D	Protein POLR1D, isoform 2 OS=Homo sapiens OX=9606 GN=POLR1D PE=1 SV=1	7	1	1	1	122	14.3	9.88	0	106.7	101.7	107.4	94.7	92.4	97
P55212	CASP6	Caspase-6 OS=Homo sapiens OX=9606 GN=CASP6 PE=1 SV=2	23	6	8	6	293	33.3	6.93	249	99.5	89.5	93.4	111.2	102.5	103.8
Q96NB2	SFXN2	Sideroflexin-2 OS=Homo sapiens OX=9606 GN=SFXN2 PE=1 SV=2	18	5	6	5	322	36.2	9.41	141	97.8	101.5	96.1	107.2	100.9	96.5
P16885	PLCG2	1-phosphatidylinositol 4,5-bisphosphate phosphodiesterase gamma-2 OS=Homo sapiens OX=9606 GN=PLCG2 PE=1 SV=4	5	5	5	5	1265	147.8	6.64	54	96.6	96.3	97.5	102.6	103.7	103.4
O95831	AIFM1	Apoptosis-inducing factor 1, mitochondrial OS=Homo sapiens OX=9606 GN=AIFM1 PE=1 SV=1	32	16	24	16	613	66.9	8.95	676	101	100.9	99.6	98.7	101.1	98.6
Q15582	TGFBI	Transforming growth factor-beta-induced protein ig-h3 OS=Homo sapiens OX=9606 GN=TGFBI PE=1 SV=1	5	3	3	3	683	74.6	7.71	70	96.7	102.7	91.2	112.7	99.4	97.2
O95394	PGM3	Phosphoacetylglucosamine mutase OS=Homo sapiens OX=9606 GN=PGM3 PE=1 SV=1	34	18	27	18	542	59.8	6.25	669	95.4	96.1	95.1	104.1	104.7	104.6
Q8IWE2	FAM114A1	Protein NOXP20 OS=Homo sapiens OX=9606 GN=FAM114A1 PE=1 SV=2	25	10	13	10	563	60.7	4.68	380	95.2	104.7	99.9	103.4	101.7	95
Q9Y5B0	CTDP1	RNA polymerase II subunit A C-terminal domain phosphatase OS=Homo sapiens OX=9606 GN=CTDP1 PE=1 SV=3	2	1	1	1	961	104.3	5.27	60	96.7	100.7	97.3	100.2	102.8	102.2
P82932	MRPS6	28S ribosomal protein S6, mitochondrial OS=Homo sapiens OX=9606 GN=MRPS6 PE=1 SV=3	6	1	2	1	125	14.2	9.26	37	107.6	102.5	98.8	96.8	98.3	96.1
P51003	PAPOLA	Poly(A) polymerase alpha OS=Homo sapiens OX=9606 GN=PAPOLA PE=1 SV=4	32	18	27	18	745	82.8	7.37	545	95.8	103.1	103.2	99.8	99.4	98.7
O00178	GTPBP1	GTP-binding protein 1 OS=Homo sapiens OX=9606 GN=GTPBP1 PE=1 SV=3	10	5	6	5	669	72.4	8.34	149	101.4	101.2	101.4	98.7	93.9	103.4
Q9Y244	POMP	Proteasome maturation protein OS=Homo sapiens OX=9606 GN=POMP PE=1 SV=1	58	6	7	6	141	15.8	5.11	113	104.4	116.1	111.1	87.7	87	93.7
P42766	RPL35	60S ribosomal protein L35 OS=Homo sapiens OX=9606 GN=RPL35 PE=1 SV=2	46	7	14	7	123	14.5	11.05	137	103	105.8	102.9	95.5	99.7	93
Q9UJ68	MSRA	Mitochondrial peptide methionine sulfoxide reductase OS=Homo sapiens OX=9606 GN=MSRA PE=1 SV=1	3	1	1	1	235	26.1	8.09	32	100.5	98.5	97.7	100.7	92.3	110.3
P0CAP1	MYZAP	Myocardial zonula adherens protein OS=Homo sapiens OX=9606 GN=MYZAP PE=1 SV=1	2	1	1	1	466	54.2	6.18	13	90.8	96.4	96.4	111.6	102.2	102.6
Q16629	SRSF7	Serine/arginine-rich splicing factor 7 OS=Homo sapiens OX=9606 GN=SRSF7 PE=1 SV=1	32	8	23	7	238	27.4	11.82	349	103.1	104.6	105.2	93.5	98.4	95.2
P47755	CAPZA2	F-actin-capping protein subunit alpha-2 OS=Homo sapiens OX=9606 GN=CAPZA2 PE=1 SV=3	65	12	18	9	286	32.9	5.85	675	103.7	108.6	104.4	93.7	93.3	96.3
Q9BSJ5	C17orf80	Uncharacterized protein C17orf80 OS=Homo sapiens OX=9606 GN=C17orf80 PE=2 SV=2	2	1	1	1	609	67.3	9.16	0	106.9	98.7	96.5	111.1	84.8	102.1
O00115	DNASE2	Deoxyribonuclease-2-alpha OS=Homo sapiens OX=9606 GN=DNASE2 PE=1 SV=2	10	3	3	3	360	39.6	8.05	47	93.6	89.9	95	113.6	101.1	106.8
Q86YN1	DOLPP1	Dolichyldiphosphatase 1 OS=Homo sapiens OX=9606 GN=DOLPP1 PE=2 SV=1	5	1	2	1	238	27	9.44	41	105	120.8	109.5	86.5	88.3	89.9
Q9NX76	CMTM6	CKLF-like MARVEL transmembrane domain-containing protein 6 OS=Homo sapiens OX=9606 GN=CMTM6 PE=1 SV=1	9	2	2	2	183	20.4	5.29	61	93.1	99.6	97.8	94.3	102.9	112.3
P78318	IGBP1	Immunoglobulin-binding protein 1 OS=Homo sapiens OX=9606 GN=IGBP1 PE=1 SV=1	15	4	6	4	339	39.2	5.38	125	99.4	98.5	99.8	100.4	101	100.9
Q8WUQ7	CACTIN	Cactin OS=Homo sapiens OX=9606 GN=CACTIN PE=1 SV=3	9	5	5	5	758	88.6	9.14	64	108.5	107.1	114	86.3	90.3	93.8
P60866	RPS20	40S ribosomal protein S20 OS=Homo sapiens OX=9606 GN=RPS20 PE=1 SV=1	54	8	14	8	119	13.4	9.94	147	100.3	102.2	99.5	99.6	99.7	98.7
Q7Z6L1	TECPR1	Tectonin beta-propeller repeat-containing protein 1 OS=Homo sapiens OX=9606 GN=TECPR1 PE=1 SV=1	3	3	3	3	1165	129.6	6.24	42	99.9	93.8	90.4	106.4	105.7	103.7
Q15181	PPA1	Inorganic pyrophosphatase OS=Homo sapiens OX=9606 GN=PPA1 PE=1 SV=2	80	19	47	18	289	32.6	5.86	962	100.3	101.9	98.7	100.4	102.2	96.7
Q96K76	USP47	Ubiquitin carboxyl-terminal hydrolase 47 OS=Homo sapiens OX=9606 GN=USP47 PE=1 SV=3	16	19	23	19	1375	157.2	5.08	516	94.6	94.7	94.9	108.3	102	105.5
Q8WUH6	TMEM263	Transmembrane protein 263 OS=Homo sapiens OX=9606 GN=TMEM263 PE=1 SV=1	39	3	7	3	116	11.7	9.32	304	97.3	98.8	101	102.1	103.9	96.8
Q53H96	PYCR3	Pyrroline-5-carboxylate reductase 3 OS=Homo sapiens OX=9606 GN=PYCR3 PE=1 SV=3	15	3	3	3	274	28.6	7.72	22	94	96.3	93.8	86.1	93.8	136.1
P56279	TCL1A	T-cell leukemia/lymphoma protein 1A OS=Homo sapiens OX=9606 GN=TCL1A PE=1 SV=1	20	1	1	1	114	13.5	5.11	0
Q96HR9	REEP6	Receptor expression-enhancing protein 6 OS=Homo sapiens OX=9606 GN=REEP6 PE=1 SV=2	10	2	3	2	211	23.4	8.56	109	105.5	99.8	83.2	89.3	107.9	114.3
Q8WV19	SFT2D1	Vesicle transport protein SFT2A OS=Homo sapiens OX=9606 GN=SFT2D1 PE=1 SV=1	18	2	3	2	159	17.8	8.65	216	84.6	95	101.6	110	102.4	106.4
Q5JPE7	NOMO2	Nodal modulator 2 OS=Homo sapiens OX=9606 GN=NOMO2 PE=1 SV=1	33	27	35	1	1267	139.4	5.76	885	97.7	99.1	92.1	103.4	106.1	101.6
Q9Y448	KNSTRN	Small kinetochore-associated protein OS=Homo sapiens OX=9606 GN=KNSTRN PE=1 SV=2	8	3	3	3	316	35.4	6.3	56	110.3	95	108	94.4	92.4	100
Q9H0V9	LMAN2L	VIP36-like protein OS=Homo sapiens OX=9606 GN=LMAN2L PE=1 SV=1	18	6	6	6	348	39.7	8.38	81	93.1	90.7	89.4	110.3	108.8	107.7
Q8IUF1	CBWD2	COBW domain-containing protein 2 OS=Homo sapiens OX=9606 GN=CBWD2 PE=2 SV=1	4	1	1	1	395	44	4.89	41	99.7	103.4	104	99.7	96.8	96.3
Q9H0S4	DDX47	Probable ATP-dependent RNA helicase DDX47 OS=Homo sapiens OX=9606 GN=DDX47 PE=1 SV=1	34	12	18	12	455	50.6	9.1	357	110.6	102.2	105	91.8	94.7	95.7
P00966	ASS1	Argininosuccinate synthase OS=Homo sapiens OX=9606 GN=ASS1 PE=1 SV=2	8	3	4	3	412	46.5	8.02	54	103.1	99.4	101.8	97.2	96.2	102.4
Q8IVD9	NUDCD3	NudC domain-containing protein 3 OS=Homo sapiens OX=9606 GN=NUDCD3 PE=1 SV=3	34	10	13	10	361	40.8	5.25	301	98	96.6	100.1	101.4	100.5	103.4
Q99829	CPNE1	Copine-1 OS=Homo sapiens OX=9606 GN=CPNE1 PE=1 SV=1	31	13	25	13	537	59	5.83	491	103.1	102.7	97.4	98.9	101	96.9
Q9Y4A5	TRRAP	Transformation/transcription domain-associated protein OS=Homo sapiens OX=9606 GN=TRRAP PE=1 SV=3	3	11	12	11	3859	437.3	8.19	187	100.9	97.8	103.2	97.1	97.4	103.5
Q15785	TOMM34	Mitochondrial import receptor subunit TOM34 OS=Homo sapiens OX=9606 GN=TOMM34 PE=1 SV=2	63	20	33	20	309	34.5	8.98	746	106.1	103.5	107.9	89.5	94.3	98.7
P49207	RPL34	60S ribosomal protein L34 OS=Homo sapiens OX=9606 GN=RPL34 PE=1 SV=3	38	7	10	7	117	13.3	11.47	151	104.9	106.6	103.8	94	99	91.7
Q9UK76	JPT1	Jupiter microtubule associated homolog 1 OS=Homo sapiens OX=9606 GN=JPT1 PE=1 SV=3	51	7	13	7	154	16	5.6	239	93.8	96.2	96.8	105.8	104.1	103.3
P30040	ERP29	Endoplasmic reticulum resident protein 29 OS=Homo sapiens OX=9606 GN=ERP29 PE=1 SV=4	54	11	36	11	261	29	7.31	1003	101.6	101	98	101.8	101.2	96.4
Q08J23	NSUN2	RNA cytosine C(5)-methyltransferase NSUN2 OS=Homo sapiens OX=9606 GN=NSUN2 PE=1 SV=2	56	38	64	38	767	86.4	6.77	1166	109.5	106.2	109.9	90.1	91.9	92.3
P62273	RPS29	40S ribosomal protein S29 OS=Homo sapiens OX=9606 GN=RPS29 PE=1 SV=2	59	4	8	4	56	6.7	10.13	91	100.5	104.5	103.2	96.4	99	96.5
Q8NFW8	CMAS	N-acylneuraminate cytidylyltransferase OS=Homo sapiens OX=9606 GN=CMAS PE=1 SV=2	43	16	19	16	434	48.3	7.93	281	94.6	93.1	94.3	103.7	106.7	107.6
P18859	ATP5PF	ATP synthase-coupling factor 6, mitochondrial OS=Homo sapiens OX=9606 GN=ATP5PF PE=1 SV=1	47	5	13	5	108	12.6	9.52	403	96.5	101.5	96.4	102.1	102.7	100.8
Q96PK6	RBM14	RNA-binding protein 14 OS=Homo sapiens OX=9606 GN=RBM14 PE=1 SV=2	30	19	32	19	669	69.4	9.67	487	101.1	103	104.4	94.3	97.6	99.6
O43896	KIF1C	Kinesin-like protein KIF1C OS=Homo sapiens OX=9606 GN=KIF1C PE=1 SV=3	9	9	9	6	1103	122.9	6.9	190	95.9	90.1	94.2	107	103.7	109.1
O43615	TIMM44	Mitochondrial import inner membrane translocase subunit TIM44 OS=Homo sapiens OX=9606 GN=TIMM44 PE=1 SV=2	50	22	35	22	452	51.3	8.32	849	96.4	94.6	98.8	102.6	104.3	103.3
Q9HBL7	PLGRKT	Plasminogen receptor (KT) OS=Homo sapiens OX=9606 GN=PLGRKT PE=1 SV=1	16	2	2	2	147	17.2	9.58	32	93	90.7	84.8	111.6	112	107.9
Q9UHV7	MED13	Mediator of RNA polymerase II transcription subunit 13 OS=Homo sapiens OX=9606 GN=MED13 PE=1 SV=3	0	1	1	1	2174	239.1	5.64	0	95	96	97.5	103.5	100.2	107.8
P62253	UBE2G1	Ubiquitin-conjugating enzyme E2 G1 OS=Homo sapiens OX=9606 GN=UBE2G1 PE=1 SV=3	39	5	6	5	170	19.5	5.3	228	103.9	97	106.7	96.2	96.2	100.1
Q9H9S4	CAB39L	Calcium-binding protein 39-like OS=Homo sapiens OX=9606 GN=CAB39L PE=1 SV=3	14	4	6	3	337	39.1	8.4	136	93.1	95.1	101.3	100.4	106.1	104
O43598	DNPH1	2'-deoxynucleoside 5'-phosphate N-hydrolase 1 OS=Homo sapiens OX=9606 GN=DNPH1 PE=1 SV=1	43	4	5	4	174	19.1	5.05	167	106.5	98.6	91.1	102.5	99.4	101.8
Q14444	CAPRIN1	Caprin-1 OS=Homo sapiens OX=9606 GN=CAPRIN1 PE=1 SV=2	18	13	25	13	709	78.3	5.25	484	98.9	97.2	108.2	100.5	99.7	95.6
Q06265	EXOSC9	Exosome complex component RRP45 OS=Homo sapiens OX=9606 GN=EXOSC9 PE=1 SV=3	28	10	13	10	439	48.9	5.29	342	102.3	99.7	102.2	97.5	98.6	99.7
P48507	GCLM	Glutamate--cysteine ligase regulatory subunit OS=Homo sapiens OX=9606 GN=GCLM PE=1 SV=1	31	8	13	8	274	30.7	6.02	297	105.1	102.7	109.9	91.4	95.2	95.8
Q99496	RNF2	E3 ubiquitin-protein ligase RING2 OS=Homo sapiens OX=9606 GN=RNF2 PE=1 SV=1	15	4	5	3	336	37.6	6.84	100	102.3	99.3	110.6	97.5	95.6	94.7
Q6P4F2	FDX2	Ferredoxin-2, mitochondrial OS=Homo sapiens OX=9606 GN=FDX2 PE=1 SV=2	17	2	2	2	186	19.9	5.54	21
Q9UIM3	FKBPL	FK506-binding protein-like OS=Homo sapiens OX=9606 GN=FKBPL PE=1 SV=1	2	1	1	1	349	38.2	5.5	0	71.7	138.5	177.1	83.6	56.3	72.8
P08727	KRT19	Keratin, type I cytoskeletal 19 OS=Homo sapiens OX=9606 GN=KRT19 PE=1 SV=4	75	34	84	22	400	44.1	5.14	1789	89.6	95.6	92.2	109.3	108.5	104.9
Q9ULJ6	ZMIZ1	Zinc finger MIZ domain-containing protein 1 OS=Homo sapiens OX=9606 GN=ZMIZ1 PE=1 SV=3	1	1	1	1	1067	115.4	7.46	51	100.7	110.6	98.9	97.4	94.4	97.9
Q8IWV8	UBR2	E3 ubiquitin-protein ligase UBR2 OS=Homo sapiens OX=9606 GN=UBR2 PE=1 SV=1	12	17	18	17	1755	200.4	6.24	234	102.8	97.3	103	103.1	96.9	96.9
Q5T200	ZC3H13	Zinc finger CCCH domain-containing protein 13 OS=Homo sapiens OX=9606 GN=ZC3H13 PE=1 SV=1	3	4	4	4	1668	196.5	9.42	67	105.8	96.5	100.2	97.6	97.6	102.3
Q9HCN8	SDF2L1	Stromal cell-derived factor 2-like protein 1 OS=Homo sapiens OX=9606 GN=SDF2L1 PE=1 SV=2	22	4	5	4	221	23.6	7.03	99	97.2	93.2	96.5	103.8	106.2	103.1
Q5CZC0	FSIP2	Fibrous sheath-interacting protein 2 OS=Homo sapiens OX=9606 GN=FSIP2 PE=2 SV=4	0	1	1	1	6907	780.1	6.71	0	111.3	95.1	95.7	103.6	94.1	100.3
Q9Y6E2	BZW2	Basic leucine zipper and W2 domain-containing protein 2 OS=Homo sapiens OX=9606 GN=BZW2 PE=1 SV=1	40	18	33	16	419	48.1	6.68	707	115.2	112.5	114	82.7	87.7	87.9
O60610	DIAPH1	Protein diaphanous homolog 1 OS=Homo sapiens OX=9606 GN=DIAPH1 PE=1 SV=2	46	50	81	50	1272	141.3	5.41	1885	97.2	101.8	99.1	98.2	102.9	100.8
Q9UKL0	RCOR1	REST corepressor 1 OS=Homo sapiens OX=9606 GN=RCOR1 PE=1 SV=2	30	11	12	8	485	53.3	7.03	255	101.5	99.9	103.9	99.5	95.7	99.5
Q02338	BDH1	D-beta-hydroxybutyrate dehydrogenase, mitochondrial OS=Homo sapiens OX=9606 GN=BDH1 PE=1 SV=3	33	9	9	9	343	38.1	8.95	199	100.5	99.2	97	103.8	99.8	99.7
P24468	NR2F2	COUP transcription factor 2 OS=Homo sapiens OX=9606 GN=NR2F2 PE=1 SV=1	25	8	8	8	414	45.5	8.28	183	104.3	100.3	111.7	98.5	93.1	92.1
Q8N684	CPSF7	Cleavage and polyadenylation specificity factor subunit 7 OS=Homo sapiens OX=9606 GN=CPSF7 PE=1 SV=1	23	9	12	9	471	52	8	271	99.9	99.8	103.3	98.2	99	99.8
P04899	GNAI2	Guanine nucleotide-binding protein G(i) subunit alpha-2 OS=Homo sapiens OX=9606 GN=GNAI2 PE=1 SV=3	63	18	54	11	355	40.4	5.54	1360	94.5	103.4	95.9	103.3	103.7	99.2
Q02252	ALDH6A1	Methylmalonate-semialdehyde dehydrogenase [acylating], mitochondrial OS=Homo sapiens OX=9606 GN=ALDH6A1 PE=1 SV=2	13	6	7	6	535	57.8	8.5	130	103	104.3	98.6	97.9	96.9	99.3
P0C221	CCDC175	Coiled-coil domain-containing protein 175 OS=Homo sapiens OX=9606 GN=CCDC175 PE=4 SV=2	1	1	2	1	793	93.6	6.71	31	96.8	93.2	98.6	113.5	98.5	99.4
P09972	ALDOC	Fructose-bisphosphate aldolase C OS=Homo sapiens OX=9606 GN=ALDOC PE=1 SV=2	38	13	37	7	364	39.4	6.87	1115	94.6	109.1	95.4	103	95.7	102.3
P57723	PCBP4	Poly(rC)-binding protein 4 OS=Homo sapiens OX=9606 GN=PCBP4 PE=2 SV=1	5	2	3	1	403	41.5	8.16	23
P41743	PRKCI	Protein kinase C iota type OS=Homo sapiens OX=9606 GN=PRKCI PE=1 SV=2	31	12	18	11	596	68.2	5.85	559	99.5	99.2	98.3	100.5	101.7	100.7
P50895	BCAM	Basal cell adhesion molecule OS=Homo sapiens OX=9606 GN=BCAM PE=1 SV=2	7	4	4	4	628	67.4	5.81	50	99.7	95.3	95.1	105.4	98.8	105.6
O75530	EED	Polycomb protein EED OS=Homo sapiens OX=9606 GN=EED PE=1 SV=2	33	13	15	13	441	50.2	7.03	250	101.9	98.3	104.4	98.3	97.4	99.7
Q86TV6	TTC7B	Tetratricopeptide repeat protein 7B OS=Homo sapiens OX=9606 GN=TTC7B PE=1 SV=3	4	2	2	2	843	94.1	6.89	60	92	101.7	98.7	100.1	102.3	105.1
Q9UMF0	ICAM5	Intercellular adhesion molecule 5 OS=Homo sapiens OX=9606 GN=ICAM5 PE=1 SV=3	1	1	1	1	924	97.1	5.95	0	98.3	101.5	99.4	101	96.5	103.2
Q8TC07	TBC1D15	TBC1 domain family member 15 OS=Homo sapiens OX=9606 GN=TBC1D15 PE=1 SV=2	13	8	8	8	691	79.4	5.67	210	104.3	107	103	93.2	95.8	96.8
Q9BY77	POLDIP3	Polymerase delta-interacting protein 3 OS=Homo sapiens OX=9606 GN=POLDIP3 PE=1 SV=2	36	10	12	10	421	46.1	9.99	349	101.4	98.9	104.9	98	98.1	98.7
O95835	LATS1	Serine/threonine-protein kinase LATS1 OS=Homo sapiens OX=9606 GN=LATS1 PE=1 SV=1	1	1	1	1	1130	126.8	8.7	17	96	109.4	104	93.7	88.1	108.7
P62491	RAB11A	Ras-related protein Rab-11A OS=Homo sapiens OX=9606 GN=RAB11A PE=1 SV=3	52	10	20	1	216	24.4	6.57	373	96	95	98.1	102.1	101.9	106.9
Q9P0L0	VAPA	Vesicle-associated membrane protein-associated protein A OS=Homo sapiens OX=9606 GN=VAPA PE=1 SV=3	51	12	31	11	249	27.9	8.62	502	100.9	105.7	100.6	96.4	99.1	97.4
Q9BRT9	GINS4	DNA replication complex GINS protein SLD5 OS=Homo sapiens OX=9606 GN=GINS4 PE=1 SV=1	28	6	6	6	223	26	4.98	61	101.9	97.7	104.9	99.3	97.9	98.3
Q13884	SNTB1	Beta-1-syntrophin OS=Homo sapiens OX=9606 GN=SNTB1 PE=1 SV=3	12	5	7	4	538	58	8.63	146	98	94.6	96.3	102.6	105.5	103.1
Q0VDF9	HSPA14	Heat shock 70 kDa protein 14 OS=Homo sapiens OX=9606 GN=HSPA14 PE=1 SV=1	26	11	13	11	509	54.8	5.59	232	100.2	108.2	121.7	94.9	86.2	88.8
Q6PL24	TMED8	Protein TMED8 OS=Homo sapiens OX=9606 GN=TMED8 PE=1 SV=1	6	1	1	1	325	35.7	4.74	29	98.3	97	98.9	104.5	101	100.3
Q8TAC2	JOSD2	Josephin-2 OS=Homo sapiens OX=9606 GN=JOSD2 PE=1 SV=1	6	1	1	1	188	20.7	7.42	36	93.2	102.9	97.4	106.3	98.5	101.7
Q9Y625	GPC6	Glypican-6 OS=Homo sapiens OX=9606 GN=GPC6 PE=1 SV=1	6	2	2	2	555	62.7	5.41	24	99.4	95.7	92.8	95.7	100.5	115.9
Q9H270	VPS11	Vacuolar protein sorting-associated protein 11 homolog OS=Homo sapiens OX=9606 GN=VPS11 PE=1 SV=1	9	9	9	9	941	107.8	7.05	82	99.1	93.6	100.4	103.3	98.9	104.7
Q9NP72	RAB18	Ras-related protein Rab-18 OS=Homo sapiens OX=9606 GN=RAB18 PE=1 SV=1	61	10	16	10	206	23	5.24	434	91	89.6	94.6	106.5	110.2	108.1
O43301	HSPA12A	Heat shock 70 kDa protein 12A OS=Homo sapiens OX=9606 GN=HSPA12A PE=1 SV=2	7	4	5	4	675	74.9	6.77	93	96.4	107	105.5	95.5	94.9	100.6
P11802	CDK4	Cyclin-dependent kinase 4 OS=Homo sapiens OX=9606 GN=CDK4 PE=1 SV=2	13	3	3	3	303	33.7	7.01	32	98.8	95.8	104.3	102.3	96.3	102.4
Q5EBL8	PDZD11	PDZ domain-containing protein 11 OS=Homo sapiens OX=9606 GN=PDZD11 PE=1 SV=2	57	5	8	5	140	16.1	7.21	154	100.1	102.8	99.3	102.3	92.2	103.4
Q9NUB1	ACSS1	Acetyl-coenzyme A synthetase 2-like, mitochondrial OS=Homo sapiens OX=9606 GN=ACSS1 PE=1 SV=2	4	3	3	3	689	74.8	7.11	45	102.8	104.5	95.3	100.9	97.4	99
Q13303	KCNAB2	Voltage-gated potassium channel subunit beta-2 OS=Homo sapiens OX=9606 GN=KCNAB2 PE=1 SV=2	28	6	7	6	367	41	9	116	96.6	107.6	104.9	94.9	96.9	99.1
Q9P0M6	H2AFY2	Core histone macro-H2A.2 OS=Homo sapiens OX=9606 GN=H2AFY2 PE=1 SV=3	9	3	5	1	372	40	9.69	158	101.6	102.4	101.3	99.2	99.1	96.4
Q92686	NRGN	Neurogranin OS=Homo sapiens OX=9606 GN=NRGN PE=1 SV=1	19	2	2	2	78	7.6	7.87	55	91.1	93.2	96.7	107.7	102.9	108.4
Q5VT52	RPRD2	Regulation of nuclear pre-mRNA domain-containing protein 2 OS=Homo sapiens OX=9606 GN=RPRD2 PE=1 SV=1	4	5	5	5	1461	155.9	7.42	48	89.6	101	108.4	95.4	103.2	102.4
Q7Z434	MAVS	Mitochondrial antiviral-signaling protein OS=Homo sapiens OX=9606 GN=MAVS PE=1 SV=2	27	9	13	9	540	56.5	5.52	375	95.2	99.1	93.4	106.7	102.3	103.3
P41219	PRPH	Peripherin OS=Homo sapiens OX=9606 GN=PRPH PE=1 SV=2	9	5	18	1	470	53.6	5.47	301	29.8	54.8	123.9	253.4	42.4	95.6
O14757	CHEK1	Serine/threonine-protein kinase Chk1 OS=Homo sapiens OX=9606 GN=CHEK1 PE=1 SV=2	2	1	1	1	476	54.4	8.25	27
Q8NCC3	PLA2G15	Group XV phospholipase A2 OS=Homo sapiens OX=9606 GN=PLA2G15 PE=1 SV=2	3	1	1	1	412	46.6	6.73	22	101.1	107.4	93.2	111.1	94	93.3
P07942	LAMB1	Laminin subunit beta-1 OS=Homo sapiens OX=9606 GN=LAMB1 PE=1 SV=2	8	10	13	10	1786	197.9	4.94	304	88.2	84.9	88.1	111.9	111.4	115.5
Q9BRR8	GPATCH1	G patch domain-containing protein 1 OS=Homo sapiens OX=9606 GN=GPATCH1 PE=1 SV=1	4	3	3	3	931	103.3	7.05	39	101.2	106.4	104.2	94.6	94.7	99
Q99487	PAFAH2	Platelet-activating factor acetylhydrolase 2, cytoplasmic OS=Homo sapiens OX=9606 GN=PAFAH2 PE=1 SV=1	4	1	1	1	392	44	6.89	27	101.2	93.6	99.1	104.5	98.9	102.7
Q9NP50	SINHCAF	SIN3-HDAC complex-associated factor OS=Homo sapiens OX=9606 GN=SINHCAF PE=1 SV=1	10	2	2	2	221	24.8	9.41	54	110.4	97.4	109.4	92.7	91.4	98.7
P13796	LCP1	Plastin-2 OS=Homo sapiens OX=9606 GN=LCP1 PE=1 SV=6	71	39	112	32	627	70.2	5.43	2595	96.7	94	91	108.3	105.8	104.2
O43175	PHGDH	D-3-phosphoglycerate dehydrogenase OS=Homo sapiens OX=9606 GN=PHGDH PE=1 SV=4	11	5	5	5	533	56.6	6.71	117	115.6	92.6	102.3	100.5	92.3	96.7
Q8IWB1	ITPRIP	Inositol 1,4,5-trisphosphate receptor-interacting protein OS=Homo sapiens OX=9606 GN=ITPRIP PE=1 SV=1	9	4	4	4	547	62	5.88	90	102.3	105.7	101.5	94.2	95.1	101.3
O14618	CCS	Copper chaperone for superoxide dismutase OS=Homo sapiens OX=9606 GN=CCS PE=1 SV=1	13	4	6	4	274	29	5.58	80	105.4	106.9	105.1	94.1	92.8	95.8
O95628	CNOT4	CCR4-NOT transcription complex subunit 4 OS=Homo sapiens OX=9606 GN=CNOT4 PE=1 SV=3	11	4	4	4	575	63.5	7.03	92	97.8	101	102.1	100.9	99.2	99.1
P09471	GNAO1	Guanine nucleotide-binding protein G(o) subunit alpha OS=Homo sapiens OX=9606 GN=GNAO1 PE=1 SV=4	31	9	15	7	354	40	5.53	351	95.7	96.4	90.3	106.9	104.2	106.4
P42126	ECI1	Enoyl-CoA delta isomerase 1, mitochondrial OS=Homo sapiens OX=9606 GN=ECI1 PE=1 SV=1	23	5	8	5	302	32.8	8.54	223	100.4	100.9	99.5	100.4	99.5	99.3
Q8TE02	ELP5	Elongator complex protein 5 OS=Homo sapiens OX=9606 GN=ELP5 PE=1 SV=2	18	5	6	5	316	34.8	4.97	130	98.4	98	102.3	100.3	98.2	102.9
Q9H944	MED20	Mediator of RNA polymerase II transcription subunit 20 OS=Homo sapiens OX=9606 GN=MED20 PE=1 SV=1	15	3	4	3	212	23.2	6.87	62	98.1	96.7	100.2	101.9	100.9	102.3
Q9Y4P3	TBL2	Transducin beta-like protein 2 OS=Homo sapiens OX=9606 GN=TBL2 PE=1 SV=1	17	7	8	7	447	49.8	9.44	188	101.4	98.1	99.2	100.3	98.3	102.7
Q8TCJ2	STT3B	Dolichyl-diphosphooligosaccharide--protein glycosyltransferase subunit STT3B OS=Homo sapiens OX=9606 GN=STT3B PE=1 SV=1	15	14	21	12	826	93.6	8.91	243	96.9	99.2	98.7	101.7	103.3	100.2
O00212	RHOD	Rho-related GTP-binding protein RhoD OS=Homo sapiens OX=9606 GN=RHOD PE=1 SV=2	3	1	1	1	210	23.4	7.96	0
O76062	TM7SF2	Delta(14)-sterol reductase TM7SF2 OS=Homo sapiens OX=9606 GN=TM7SF2 PE=1 SV=3	2	1	1	1	418	46.4	8.87	14	98.6	94.8	99.7	103	97.1	106.8
Q8IW35	CEP97	Centrosomal protein of 97 kDa OS=Homo sapiens OX=9606 GN=CEP97 PE=1 SV=1	12	8	9	8	865	96.9	5.02	169	95.6	96	92.4	107.1	102.5	106.5
Q13098	GPS1	COP9 signalosome complex subunit 1 OS=Homo sapiens OX=9606 GN=GPS1 PE=1 SV=4	24	12	14	12	491	55.5	6.74	328	97	99.8	100.8	99.4	102	100.9
Q96GC5	MRPL48	39S ribosomal protein L48, mitochondrial OS=Homo sapiens OX=9606 GN=MRPL48 PE=1 SV=2	25	5	8	5	212	23.9	8.98	206	97.8	96.5	98.5	102.4	102.4	102.3
P55036	PSMD4	26S proteasome non-ATPase regulatory subunit 4 OS=Homo sapiens OX=9606 GN=PSMD4 PE=1 SV=1	49	15	23	11	377	40.7	4.79	780	102	101.1	99.4	97.6	101.8	98.1
Q9NUG6	PDRG1	p53 and DNA damage-regulated protein 1 OS=Homo sapiens OX=9606 GN=PDRG1 PE=1 SV=2	24	3	4	3	133	15.5	6.06	71	100.9	96.9	106.1	95.9	101.5	98.6
Q9UJ83	HACL1	2-hydroxyacyl-CoA lyase 1 OS=Homo sapiens OX=9606 GN=HACL1 PE=1 SV=2	11	5	6	5	578	63.7	7.36	139	91.3	85.6	89.8	110	111.9	111.3
Q9Y4L1	HYOU1	Hypoxia up-regulated protein 1 OS=Homo sapiens OX=9606 GN=HYOU1 PE=1 SV=1	54	45	97	45	999	111.3	5.22	2491	97.6	97.7	96.5	105.4	102.5	100.3
O95861	BPNT1	3'(2'),5'-bisphosphate nucleotidase 1 OS=Homo sapiens OX=9606 GN=BPNT1 PE=1 SV=1	51	15	19	15	308	33.4	5.69	413	95.5	99.5	95.8	102.3	104.1	102.9
Q8IWX8	CHERP	Calcium homeostasis endoplasmic reticulum protein OS=Homo sapiens OX=9606 GN=CHERP PE=1 SV=3	21	16	22	16	916	103.6	9.04	513	104	101.2	105.3	96.7	96.7	96.1
Q9NQ66	PLCB1	1-phosphatidylinositol 4,5-bisphosphate phosphodiesterase beta-1 OS=Homo sapiens OX=9606 GN=PLCB1 PE=1 SV=1	2	1	1	1	1216	138.5	6.23	0
Q7L0Y3	TRMT10C	tRNA methyltransferase 10 homolog C OS=Homo sapiens OX=9606 GN=TRMT10C PE=1 SV=2	42	12	15	12	403	47.3	9.36	353	100.8	96.4	98	103.5	100.9	100.4
P54277	PMS1	PMS1 protein homolog 1 OS=Homo sapiens OX=9606 GN=PMS1 PE=1 SV=1	1	1	1	1	932	105.8	6.67	39	105.4	91.1	102.5	95.1	93.4	112.4
O94916	NFAT5	Nuclear factor of activated T-cells 5 OS=Homo sapiens OX=9606 GN=NFAT5 PE=1 SV=1	0	1	1	1	1531	165.7	5.24	0
Q9UHP3	USP25	Ubiquitin carboxyl-terminal hydrolase 25 OS=Homo sapiens OX=9606 GN=USP25 PE=1 SV=4	2	1	1	1	1055	122.1	5.34	40
P35790	CHKA	Choline kinase alpha OS=Homo sapiens OX=9606 GN=CHKA PE=1 SV=3	16	4	4	4	457	52.2	6.55	71	96.2	96.9	111.3	99.2	96.4	100
Q14739	LBR	Delta(14)-sterol reductase LBR OS=Homo sapiens OX=9606 GN=LBR PE=1 SV=2	22	15	28	15	615	70.7	9.36	227	108.1	108	99.4	92.6	98.3	93.6
Q8NBM8	PCYOX1L	Prenylcysteine oxidase-like OS=Homo sapiens OX=9606 GN=PCYOX1L PE=1 SV=2	5	3	3	3	494	54.6	7.31	51	92.3	88.5	86.7	118.1	102.7	111.6
Q86U44	METTL3	N6-adenosine-methyltransferase catalytic subunit OS=Homo sapiens OX=9606 GN=METTL3 PE=1 SV=2	10	5	6	5	580	64.4	6.42	170	103.2	102.4	103	95.4	97.3	98.7
Q6P3X3	TTC27	Tetratricopeptide repeat protein 27 OS=Homo sapiens OX=9606 GN=TTC27 PE=1 SV=1	23	17	18	17	843	96.6	5.59	451	106.1	101.3	103	97.3	95.3	97.1
O43390	HNRNPR	Heterogeneous nuclear ribonucleoprotein R OS=Homo sapiens OX=9606 GN=HNRNPR PE=1 SV=1	46	28	65	20	633	70.9	8.13	1274	107.9	108.8	106.5	89.5	95.1	92.1
Q14653	IRF3	Interferon regulatory factor 3 OS=Homo sapiens OX=9606 GN=IRF3 PE=1 SV=1	26	8	12	8	427	47.2	5.34	287	99.5	100.7	101.6	96.4	99.5	102.3
P50995	ANXA11	Annexin A11 OS=Homo sapiens OX=9606 GN=ANXA11 PE=1 SV=1	38	19	28	19	505	54.4	7.65	719	99.4	107.3	98	100.1	98.9	96.3
O75356	ENTPD5	Ectonucleoside triphosphate diphosphohydrolase 5 OS=Homo sapiens OX=9606 GN=ENTPD5 PE=1 SV=1	6	2	2	2	428	47.5	6.33	54	96.1	97.3	90.4	104.7	101.8	109.7
Q9Y4Y9	LSM5	U6 snRNA-associated Sm-like protein LSm5 OS=Homo sapiens OX=9606 GN=LSM5 PE=1 SV=3	46	2	5	2	91	9.9	4.54	181	95.7	99.6	99.8	103.1	96	105.8
Q9Y5J6	TIMM10B	Mitochondrial import inner membrane translocase subunit Tim10 B OS=Homo sapiens OX=9606 GN=TIMM10B PE=1 SV=1	55	4	4	4	103	11.6	7.43	45	97.8	99.2	99	102.3	101.9	99.8
Q7Z7F7	MRPL55	39S ribosomal protein L55, mitochondrial OS=Homo sapiens OX=9606 GN=MRPL55 PE=1 SV=1	30	3	4	3	128	15.1	11.15	106	98.3	99	102	101.4	98.4	100.8
Q9H981	ACTR8	Actin-related protein 8 OS=Homo sapiens OX=9606 GN=ACTR8 PE=1 SV=2	3	2	2	2	624	70.4	7.78	13	97.9	99.5	100.9	105.1	97.2	99.4
Q92692	NECTIN2	Nectin-2 OS=Homo sapiens OX=9606 GN=NECTIN2 PE=1 SV=1	10	5	6	5	538	57.7	4.82	110	98	97.9	95.1	101.1	103.9	104
Q9H4L5	OSBPL3	Oxysterol-binding protein-related protein 3 OS=Homo sapiens OX=9606 GN=OSBPL3 PE=1 SV=1	22	14	17	13	887	101.2	6.87	481	100.1	101.4	98.7	98.4	101.8	99.6
Q96HV5	TMEM41A	Transmembrane protein 41A OS=Homo sapiens OX=9606 GN=TMEM41A PE=1 SV=1	5	1	1	1	264	29.6	9.03	22	101	97.1	104.8	91.3	100.5	105.3
O14832	PHYH	Phytanoyl-CoA dioxygenase, peroxisomal OS=Homo sapiens OX=9606 GN=PHYH PE=1 SV=1	2	1	1	1	338	38.5	8.47	0	86.9	86.8	84.6	106.5	125.1	110.1
Q12765	SCRN1	Secernin-1 OS=Homo sapiens OX=9606 GN=SCRN1 PE=1 SV=2	41	16	23	16	414	46.4	4.75	658	96.6	97.7	94.7	108.4	102.4	100.2
P28072	PSMB6	Proteasome subunit beta type-6 OS=Homo sapiens OX=9606 GN=PSMB6 PE=1 SV=4	53	9	24	9	239	25.3	4.92	532	95.3	93.4	93.6	96.3	96	125.5
O75822	EIF3J	Eukaryotic translation initiation factor 3 subunit J OS=Homo sapiens OX=9606 GN=EIF3J PE=1 SV=2	57	16	30	16	258	29	4.83	693	105.4	98.3	101.8	98.1	98.3	98
Q93100	PHKB	Phosphorylase b kinase regulatory subunit beta OS=Homo sapiens OX=9606 GN=PHKB PE=1 SV=3	1	1	1	1	1093	124.8	6.95	29	99.5	104.6	102.4	102.5	93.2	97.9
O00562	PITPNM1	Membrane-associated phosphatidylinositol transfer protein 1 OS=Homo sapiens OX=9606 GN=PITPNM1 PE=1 SV=4	3	3	3	3	1244	134.8	5.95	15	101.4	96	99.8	97	103.9	101.9
Q86W56	PARG	Poly(ADP-ribose) glycohydrolase OS=Homo sapiens OX=9606 GN=PARG PE=1 SV=1	9	7	7	7	976	111	6.43	129	100.5	100.3	101.4	99	100.6	98.2
P57088	TMEM33	Transmembrane protein 33 OS=Homo sapiens OX=9606 GN=TMEM33 PE=1 SV=2	15	4	7	4	247	28	9.7	132	101.4	103.6	104.2	94.5	101	95.2
Q8TF68	ZNF384	Zinc finger protein 384 OS=Homo sapiens OX=9606 GN=ZNF384 PE=1 SV=2	9	4	4	4	577	63.2	8.95	93	104.3	104.6	108.6	92	94.7	95.8
P57772	EEFSEC	Selenocysteine-specific elongation factor OS=Homo sapiens OX=9606 GN=EEFSEC PE=1 SV=4	7	3	4	3	596	65.3	8.35	108	103.9	103.4	99.7	98.2	95	99.7
P28702	RXRB	Retinoic acid receptor RXR-beta OS=Homo sapiens OX=9606 GN=RXRB PE=1 SV=2	9	5	6	5	533	56.9	8.18	107	106.2	104.6	108.5	96.6	92.8	91.2
Q5SW79	CEP170	Centrosomal protein of 170 kDa OS=Homo sapiens OX=9606 GN=CEP170 PE=1 SV=1	28	33	42	33	1584	175.2	7.11	830	101.4	101.6	104.1	97	97.3	98.5
A1A4S6	ARHGAP10	Rho GTPase-activating protein 10 OS=Homo sapiens OX=9606 GN=ARHGAP10 PE=1 SV=1	2	2	2	2	786	89.3	7.18	56	107.9	105.6	106.9	91.3	92.5	95.9
Q16881	TXNRD1	Thioredoxin reductase 1, cytoplasmic OS=Homo sapiens OX=9606 GN=TXNRD1 PE=1 SV=3	51	25	57	24	649	70.9	7.39	1408	103.5	103.4	108.1	91.4	96.1	97.4
Q04760	GLO1	Lactoylglutathione lyase OS=Homo sapiens OX=9606 GN=GLO1 PE=1 SV=4	69	11	21	11	184	20.8	5.31	503	103.8	100.3	102.6	101.9	92.8	98.6
Q92802	N4BP2L2	NEDD4-binding protein 2-like 2 OS=Homo sapiens OX=9606 GN=N4BP2L2 PE=1 SV=1	1	1	1	1	583	67.4	6.39	0	111.8	97	98.2	103	95.6	94.2
Q9NZD8	SPG21	Maspardin OS=Homo sapiens OX=9606 GN=SPG21 PE=1 SV=1	6	2	2	2	308	34.9	6.28	34	105.1	98	103.3	102.5	95.6	95.4
P61964	WDR5	WD repeat-containing protein 5 OS=Homo sapiens OX=9606 GN=WDR5 PE=1 SV=1	40	10	18	10	334	36.6	8.27	405	104.1	100.1	101.9	97	99.7	97.1
P35221	CTNNA1	Catenin alpha-1 OS=Homo sapiens OX=9606 GN=CTNNA1 PE=1 SV=1	50	34	50	28	906	100	6.29	1719	105.2	102.2	105.3	94.9	93.6	98.9
P62314	SNRPD1	Small nuclear ribonucleoprotein Sm D1 OS=Homo sapiens OX=9606 GN=SNRPD1 PE=1 SV=1	28	3	6	3	119	13.3	11.56	201	101.9	107	104.9	93.5	99.1	93.5
O00233	PSMD9	26S proteasome non-ATPase regulatory subunit 9 OS=Homo sapiens OX=9606 GN=PSMD9 PE=1 SV=3	40	8	16	8	223	24.7	6.95	275	100.6	99.6	98.1	98.6	101.8	101.3
Q9NTX5	ECHDC1	Ethylmalonyl-CoA decarboxylase OS=Homo sapiens OX=9606 GN=ECHDC1 PE=1 SV=2	45	11	16	11	307	33.7	8.21	538	106.2	106.6	100.8	93.9	96.5	95.9
Q8TBC4	UBA3	NEDD8-activating enzyme E1 catalytic subunit OS=Homo sapiens OX=9606 GN=UBA3 PE=1 SV=2	62	22	32	22	463	51.8	5.45	811	99.8	99.5	98.7	99.3	98.8	103.9
Q13951	CBFB	Core-binding factor subunit beta OS=Homo sapiens OX=9606 GN=CBFB PE=1 SV=2	31	5	7	5	182	21.5	6.6	151	93.7	95.6	98.3	102.2	105.5	104.8
P46937	YAP1	Transcriptional coactivator YAP1 OS=Homo sapiens OX=9606 GN=YAP1 PE=1 SV=2	27	9	16	8	504	54.4	5.17	538	91	91.7	93.6	105.9	106.3	111.5
Q92979	EMG1	Ribosomal RNA small subunit methyltransferase NEP1 OS=Homo sapiens OX=9606 GN=EMG1 PE=1 SV=4	38	7	10	7	244	26.7	9.17	306	103.5	99.2	103.4	98.2	96.8	98.9
Q9Y692	GMEB1	Glucocorticoid modulatory element-binding protein 1 OS=Homo sapiens OX=9606 GN=GMEB1 PE=1 SV=2	3	1	1	1	573	62.6	4.83	60	100.5	96.7	114.2	100.2	93.2	95.1
Q96RT1	ERBIN	Erbin OS=Homo sapiens OX=9606 GN=ERBIN PE=1 SV=2	16	17	19	15	1412	158.2	5.5	405	98.1	99.7	99.2	101.2	98.4	103.4
P48147	PREP	Prolyl endopeptidase OS=Homo sapiens OX=9606 GN=PREP PE=1 SV=2	52	28	43	28	710	80.6	5.86	1219	99.7	102.9	101.4	97.6	99.5	98.9
Q9NPD3	EXOSC4	Exosome complex component RRP41 OS=Homo sapiens OX=9606 GN=EXOSC4 PE=1 SV=3	34	8	8	8	245	26.4	6.52	153	103.6	100.2	100.4	95	98.5	102.2
P46108	CRK	Adapter molecule crk OS=Homo sapiens OX=9606 GN=CRK PE=1 SV=2	43	12	20	12	304	33.8	5.55	581	103.7	105.3	103.8	95.8	95.1	96.4
Q12834	CDC20	Cell division cycle protein 20 homolog OS=Homo sapiens OX=9606 GN=CDC20 PE=1 SV=2	4	2	2	2	499	54.7	9.23	39	106.2	87.5	124.4	109.8	80.1	91.9
P0C7P0	CISD3	CDGSH iron-sulfur domain-containing protein 3, mitochondrial OS=Homo sapiens OX=9606 GN=CISD3 PE=1 SV=1	6	1	1	1	127	14.2	10.55	35	98.5	100.4	93.8	99.9	109.5	97.8
P31151	S100A7	Protein S100-A7 OS=Homo sapiens OX=9606 GN=S100A7 PE=1 SV=4	11	1	1	1	101	11.5	6.77	0	70.2	69.6	77.2	60.6	60.7	261.8
Q15906	VPS72	Vacuolar protein sorting-associated protein 72 homolog OS=Homo sapiens OX=9606 GN=VPS72 PE=1 SV=1	2	1	1	1	364	40.6	6.48	14
P50336	PPOX	Protoporphyrinogen oxidase OS=Homo sapiens OX=9606 GN=PPOX PE=1 SV=1	11	4	4	4	477	50.7	8.16	107	96.9	99	95.8	101	105.7	101.6
Q5SW96	LDLRAP1	Low density lipoprotein receptor adapter protein 1 OS=Homo sapiens OX=9606 GN=LDLRAP1 PE=1 SV=3	22	6	9	6	308	33.9	6.7	260	97.1	94.8	96.8	109.8	101.1	100.4
Q86YR5	GPSM1	G-protein-signaling modulator 1 OS=Homo sapiens OX=9606 GN=GPSM1 PE=1 SV=2	5	3	3	2	675	74.5	6.54	30	98.8	91.7	98	107	99.7	104.7
Q8IXQ3	C9orf40	Uncharacterized protein C9orf40 OS=Homo sapiens OX=9606 GN=C9orf40 PE=1 SV=1	22	2	2	2	194	21.1	5.01	121	98.8	88.8	90.8	108.4	104.7	108.4
O75874	IDH1	Isocitrate dehydrogenase [NADP] cytoplasmic OS=Homo sapiens OX=9606 GN=IDH1 PE=1 SV=2	46	17	31	17	414	46.6	7.01	793	94.8	97.8	93.1	106.5	105	102.8
Q9Y4Z0	LSM4	U6 snRNA-associated Sm-like protein LSm4 OS=Homo sapiens OX=9606 GN=LSM4 PE=1 SV=1	27	5	10	5	139	15.3	9.99	172	93.4	98.5	97.7	97.7	103.9	108.7
Q96GM5	SMARCD1	SWI/SNF-related matrix-associated actin-dependent regulator of chromatin subfamily D member 1 OS=Homo sapiens OX=9606 GN=SMARCD1 PE=1 SV=2	7	3	4	2	515	58.2	9.25	151	95.3	103.1	115.6	85.9	100	100.2
Q9BV19	C1orf50	Uncharacterized protein C1orf50 OS=Homo sapiens OX=9606 GN=C1orf50 PE=1 SV=2	16	2	2	2	199	21.9	5.88	37	98.5	104.7	101.9	96.6	95.6	102.7
Q9P2I0	CPSF2	Cleavage and polyadenylation specificity factor subunit 2 OS=Homo sapiens OX=9606 GN=CPSF2 PE=1 SV=2	21	14	15	14	782	88.4	5.11	214	100.4	102	102.5	97.9	98.2	99
P52756	RBM5	RNA-binding protein 5 OS=Homo sapiens OX=9606 GN=RBM5 PE=1 SV=2	6	5	6	3	815	92.1	6.28	134	94.7	88	105.3	108.5	98	105.5
A4D1T9	PRSS37	Probable inactive serine protease 37 OS=Homo sapiens OX=9606 GN=PRSS37 PE=1 SV=1	7	1	2	1	235	26.4	8.87	14	107.4	111.4	105.3	84.3	85.8	105.8
Q6P4A7	SFXN4	Sideroflexin-4 OS=Homo sapiens OX=9606 GN=SFXN4 PE=1 SV=1	3	1	1	1	337	38	9.19	24	108.2	109.9	102.6	96.7	92.5	90.1
Q8IYA6	CKAP2L	Cytoskeleton-associated protein 2-like OS=Homo sapiens OX=9606 GN=CKAP2L PE=1 SV=4	2	1	1	1	745	83.5	9.83	23
P49915	GMPS	GMP synthase [glutamine-hydrolyzing] OS=Homo sapiens OX=9606 GN=GMPS PE=1 SV=1	60	31	54	31	693	76.7	6.87	1129	102.6	101.5	102.3	97.2	97.6	98.9
Q96JC9	EAF1	ELL-associated factor 1 OS=Homo sapiens OX=9606 GN=EAF1 PE=1 SV=1	4	1	1	1	268	29	5.4	0
Q5GLZ8	HERC4	Probable E3 ubiquitin-protein ligase HERC4 OS=Homo sapiens OX=9606 GN=HERC4 PE=1 SV=1	21	16	18	16	1057	118.5	6.19	357	99.3	93.8	93.8	108.9	103.4	100.8
Q494V2	CFAP100	Cilia- and flagella-associated protein 100 OS=Homo sapiens OX=9606 GN=CFAP100 PE=2 SV=1	1	1	1	1	611	71.1	7.11	0	93.5	106.1	85	90.3	134.5	90.6
P26022	PTX3	Pentraxin-related protein PTX3 OS=Homo sapiens OX=9606 GN=PTX3 PE=1 SV=3	11	3	4	3	381	41.9	5.01	86	108.9	107.2	102	82.4	89.4	110.1
Q96JH7	VCPIP1	Deubiquitinating protein VCIP135 OS=Homo sapiens OX=9606 GN=VCPIP1 PE=1 SV=2	7	6	7	6	1222	134.2	7.2	159	96.5	94.5	97	108.9	99.2	104
A0JNW5	UHRF1BP1L	UHRF1-binding protein 1-like OS=Homo sapiens OX=9606 GN=UHRF1BP1L PE=1 SV=2	1	2	2	1	1464	164.1	6.32	20	94.3	95.5	95.9	105.3	102.6	106.4
Q13415	ORC1	Origin recognition complex subunit 1 OS=Homo sapiens OX=9606 GN=ORC1 PE=1 SV=2	4	2	2	2	861	97.3	9.22	68	71.7	101.1	144.7	70.9	105	106.7
P11169	SLC2A3	Solute carrier family 2, facilitated glucose transporter member 3 OS=Homo sapiens OX=9606 GN=SLC2A3 PE=1 SV=1	14	7	9	7	496	53.9	7.2	158	98.4	97.6	92.2	106.7	101.5	103.5
P62316	SNRPD2	Small nuclear ribonucleoprotein Sm D2 OS=Homo sapiens OX=9606 GN=SNRPD2 PE=1 SV=1	68	9	32	9	118	13.5	9.91	521	101.4	103.4	105.1	97	96.1	97
Q5BJF6	ODF2	Outer dense fiber protein 2 OS=Homo sapiens OX=9606 GN=ODF2 PE=1 SV=1	1	1	1	1	829	95.3	7.62	0	102.7	96.2	102.9	87.9	101.1	109.2
Q9BW62	KATNAL1	Katanin p60 ATPase-containing subunit A-like 1 OS=Homo sapiens OX=9606 GN=KATNAL1 PE=1 SV=1	22	8	10	7	490	55.4	6.74	259	92.5	96	96.6	107.7	102.7	104.6
Q9Y2H2	INPP5F	Phosphatidylinositide phosphatase SAC2 OS=Homo sapiens OX=9606 GN=INPP5F PE=1 SV=3	5	6	6	6	1132	128.3	7.02	41	101.7	100.6	99.9	99.7	95.7	102.4
Q9BQ15	NABP2	SOSS complex subunit B1 OS=Homo sapiens OX=9606 GN=NABP2 PE=1 SV=1	17	2	2	2	211	22.3	9.06	47	95.1	107.5	98.1	98.6	97.2	103.5
Q8WWI1	LMO7	LIM domain only protein 7 OS=Homo sapiens OX=9606 GN=LMO7 PE=1 SV=3	25	33	40	32	1683	192.6	8.09	904	93.3	89.4	96	108.8	106	106.6
P62277	RPS13	40S ribosomal protein S13 OS=Homo sapiens OX=9606 GN=RPS13 PE=1 SV=2	60	11	37	11	151	17.2	10.54	493	102.6	100.7	101.7	96.4	99.4	99.2
Q9NT62	ATG3	Ubiquitin-like-conjugating enzyme ATG3 OS=Homo sapiens OX=9606 GN=ATG3 PE=1 SV=1	35	7	10	7	314	35.8	4.74	174	99.1	101.9	102.6	95.1	94.8	106.5
P07947	YES1	Tyrosine-protein kinase Yes OS=Homo sapiens OX=9606 GN=YES1 PE=1 SV=3	30	13	18	8	543	60.8	6.74	259	105.3	99.7	102.4	97.4	98.5	96.7
Q9Y4K1	CRYBG1	Beta/gamma crystallin domain-containing protein 1 OS=Homo sapiens OX=9606 GN=CRYBG1 PE=1 SV=3	7	8	9	8	1723	188.6	5.86	170	95.9	94.9	93.2	104.9	104.2	107
Q5TA45	INTS11	Integrator complex subunit 11 OS=Homo sapiens OX=9606 GN=INTS11 PE=1 SV=2	4	2	2	2	600	67.6	8.06	42	106.6	105.1	100.2	96.6	98.4	93.1
Q9UIC8	LCMT1	Leucine carboxyl methyltransferase 1 OS=Homo sapiens OX=9606 GN=LCMT1 PE=1 SV=2	10	3	3	3	334	38.4	6.04	67	94	94.7	95.1	104.3	107.8	104.1
Q86WA8	LONP2	Lon protease homolog 2, peroxisomal OS=Homo sapiens OX=9606 GN=LONP2 PE=1 SV=1	1	1	1	1	852	94.6	7.3	23	93.7	87.4	94.8	120.2	106.4	97.6
Q86YS6	RAB43	Ras-related protein Rab-43 OS=Homo sapiens OX=9606 GN=RAB43 PE=1 SV=1	14	2	5	1	212	23.3	5.64	124	106.4	104.7	102.8	91.1	93.8	101.2
P23434	GCSH	Glycine cleavage system H protein, mitochondrial OS=Homo sapiens OX=9606 GN=GCSH PE=1 SV=2	17	2	5	2	173	18.9	4.88	173	95.3	101.6	102	102.6	98.5	99.9
O60551	NMT2	Glycylpeptide N-tetradecanoyltransferase 2 OS=Homo sapiens OX=9606 GN=NMT2 PE=1 SV=1	39	15	21	11	498	56.9	7.58	533	104.7	104	97.7	97.4	99.1	97.1
Q8NFX7	STXBP6	Syntaxin-binding protein 6 OS=Homo sapiens OX=9606 GN=STXBP6 PE=1 SV=2	5	1	1	1	210	23.5	9.04	26
P20618	PSMB1	Proteasome subunit beta type-1 OS=Homo sapiens OX=9606 GN=PSMB1 PE=1 SV=2	43	9	19	9	241	26.5	8.13	452	96	96	96.5	103.8	104.8	102.9
O95260	ATE1	Arginyl-tRNA--protein transferase 1 OS=Homo sapiens OX=9606 GN=ATE1 PE=1 SV=2	21	7	7	7	518	59.1	7.93	134	99.6	99.2	102.4	100.1	98	100.6
Q9Y6N1	COX11	Cytochrome c oxidase assembly protein COX11, mitochondrial OS=Homo sapiens OX=9606 GN=COX11 PE=1 SV=3	14	2	2	2	276	31.4	9.06	57	94.5	96.8	98	107.1	98	105.7
Q99732	LITAF	Lipopolysaccharide-induced tumor necrosis factor-alpha factor OS=Homo sapiens OX=9606 GN=LITAF PE=1 SV=2	4	1	1	1	161	17.1	6.44	18	94.7	115.6	131.7	75.3	94.5	88
O43583	DENR	Density-regulated protein OS=Homo sapiens OX=9606 GN=DENR PE=1 SV=2	63	10	20	10	198	22.1	5.3	452	101.3	97.6	95.7	102.2	102.1	101.2
P45985	MAP2K4	Dual specificity mitogen-activated protein kinase kinase 4 OS=Homo sapiens OX=9606 GN=MAP2K4 PE=1 SV=1	22	6	8	6	399	44.3	8.07	190	102.5	105.8	101.2	97.8	99.7	93
P43246	MSH2	DNA mismatch repair protein Msh2 OS=Homo sapiens OX=9606 GN=MSH2 PE=1 SV=1	39	28	37	28	934	104.7	5.77	942	110.3	109.6	108.1	90.5	90.2	91.3
Q9H3H5	DPAGT1	UDP-N-acetylglucosamine--dolichyl-phosphate N-acetylglucosaminephosphotransferase OS=Homo sapiens OX=9606 GN=DPAGT1 PE=1 SV=2	2	1	1	1	408	46.1	8	0	100.5	90.1	90.7	104.2	111.3	103.2
Q6IA86	ELP2	Elongator complex protein 2 OS=Homo sapiens OX=9606 GN=ELP2 PE=1 SV=2	14	9	10	9	826	92.4	5.96	135	102	96.7	100	100.7	97.9	102.6
O43818	RRP9	U3 small nucleolar RNA-interacting protein 2 OS=Homo sapiens OX=9606 GN=RRP9 PE=1 SV=1	34	12	16	12	475	51.8	7.85	276	106.6	101.7	101.3	94.2	97.9	98.3
Q03518	TAP1	Antigen peptide transporter 1 OS=Homo sapiens OX=9606 GN=TAP1 PE=1 SV=2	20	11	15	11	808	87.2	8.02	346	87.8	90.5	86.6	112	111.3	111.8
P67870	CSNK2B	Casein kinase II subunit beta OS=Homo sapiens OX=9606 GN=CSNK2B PE=1 SV=1	41	8	13	8	215	24.9	5.55	331	99.8	97.4	105.5	98.5	100.8	98.1
Q9BSJ8	ESYT1	Extended synaptotagmin-1 OS=Homo sapiens OX=9606 GN=ESYT1 PE=1 SV=1	43	34	53	34	1104	122.8	5.83	1446	91.1	96.9	97.6	103.9	102.8	107.6
P06493	CDK1	Cyclin-dependent kinase 1 OS=Homo sapiens OX=9606 GN=CDK1 PE=1 SV=3	62	15	34	14	297	34.1	8.4	612	104.7	97.2	107.1	103.5	90.8	96.8
Q9H9B1	EHMT1	Histone-lysine N-methyltransferase EHMT1 OS=Homo sapiens OX=9606 GN=EHMT1 PE=1 SV=4	1	1	1	1	1298	141.4	5.76	22
Q9HD15	SRA1	Steroid receptor RNA activator 1 OS=Homo sapiens OX=9606 GN=SRA1 PE=1 SV=1	17	4	6	4	236	25.7	7.03	78	109.4	110.5	101.5	93.4	93.7	91.5
Q86Y82	STX12	Syntaxin-12 OS=Homo sapiens OX=9606 GN=STX12 PE=1 SV=1	26	5	6	5	276	31.6	5.59	147	97.6	99.3	95.3	108.3	97.8	101.7
Q9P2B4	CTTNBP2NL	CTTNBP2 N-terminal-like protein OS=Homo sapiens OX=9606 GN=CTTNBP2NL PE=1 SV=2	21	12	12	12	639	70.1	8.06	230	100.7	100.5	100.8	98.1	99.5	100.4
Q9BVK8	TMEM147	Transmembrane protein 147 OS=Homo sapiens OX=9606 GN=TMEM147 PE=1 SV=1	8	2	2	2	224	25.2	7.71	61	99.2	95.7	104.1	103.4	102.6	95
Q06330	RBPJ	Recombining binding protein suppressor of hairless OS=Homo sapiens OX=9606 GN=RBPJ PE=1 SV=3	20	8	10	8	500	55.6	7.18	191	101.5	102	103.2	97	95	101.2
Q7Z7H5	TMED4	Transmembrane emp24 domain-containing protein 4 OS=Homo sapiens OX=9606 GN=TMED4 PE=1 SV=1	25	4	7	3	227	25.9	8.28	212	101.9	97	99.7	99.4	98.7	103.4
Q9H2P9	DPH5	Diphthine methyl ester synthase OS=Homo sapiens OX=9606 GN=DPH5 PE=1 SV=2	21	6	6	6	285	31.6	5.31	86	99.6	94.4	99.1	99	100.4	107.4
Q96RF0	SNX18	Sorting nexin-18 OS=Homo sapiens OX=9606 GN=SNX18 PE=1 SV=2	5	3	4	3	628	68.9	5.68	106	92.1	88.3	86.9	118.2	106.3	108.1
Q96FF9	CDCA5	Sororin OS=Homo sapiens OX=9606 GN=CDCA5 PE=1 SV=1	17	4	4	4	252	27.6	9.61	43	124.4	104.8	120.9	88.9	78	83.1
P41567	EIF1	Eukaryotic translation initiation factor 1 OS=Homo sapiens OX=9606 GN=EIF1 PE=1 SV=1	76	8	12	3	113	12.7	7.44	302	102.2	106.5	107.8	92.1	95.4	95.9
P38159	RBMX	RNA-binding motif protein, X chromosome OS=Homo sapiens OX=9606 GN=RBMX PE=1 SV=3	33	14	21	7	391	42.3	10.05	359	105.9	103.8	105.7	91.1	95.5	98
P35580	MYH10	Myosin-10 OS=Homo sapiens OX=9606 GN=MYH10 PE=1 SV=3	41	80	141	63	1976	228.9	5.54	3235	102	106.2	101.8	96.8	96	97.2
Q9UNP9	PPIE	Peptidyl-prolyl cis-trans isomerase E OS=Homo sapiens OX=9606 GN=PPIE PE=1 SV=1	25	8	10	7	301	33.4	5.6	180	100.6	102.6	104.7	95.6	97.2	99.2
P19474	TRIM21	E3 ubiquitin-protein ligase TRIM21 OS=Homo sapiens OX=9606 GN=TRIM21 PE=1 SV=1	9	4	4	4	475	54.1	6.38	82	94.7	96	92	105.3	103.8	108.1
P07948	LYN	Tyrosine-protein kinase Lyn OS=Homo sapiens OX=9606 GN=LYN PE=1 SV=3	23	10	11	8	512	58.5	7.11	186	99.4	94.8	106.7	101.2	97.1	100.9
P18085	ARF4	ADP-ribosylation factor 4 OS=Homo sapiens OX=9606 GN=ARF4 PE=1 SV=3	80	11	44	7	180	20.5	7.14	1312	110.3	115.6	110.8	86.2	88.3	88.7
P34897	SHMT2	Serine hydroxymethyltransferase, mitochondrial OS=Homo sapiens OX=9606 GN=SHMT2 PE=1 SV=3	52	23	52	22	504	56	8.53	1261	104.5	100.1	99.1	98.6	99.8	97.9
P78537	BLOC1S1	Biogenesis of lysosome-related organelles complex 1 subunit 1 OS=Homo sapiens OX=9606 GN=BLOC1S1 PE=1 SV=2	26	2	3	2	153	17.3	9.33	71	97	96.1	91.7	108.2	105.5	101.5
P62987	UBA52	Ubiquitin-60S ribosomal protein L40 OS=Homo sapiens OX=9606 GN=UBA52 PE=1 SV=2	46	7	110	1	128	14.7	9.83	1425	90.6	101.5	112.1	100.4	104.7	90.8
Q9NXX6	NSMCE4A	Non-structural maintenance of chromosomes element 4 homolog A OS=Homo sapiens OX=9606 GN=NSMCE4A PE=1 SV=2	13	4	5	4	385	44.3	5.38	91	99.5	95.9	98.6	98.1	104	104
Q5VYS8	TUT7	Terminal uridylyltransferase 7 OS=Homo sapiens OX=9606 GN=TUT7 PE=1 SV=1	1	1	1	1	1495	171.1	6.83	21
O75376	NCOR1	Nuclear receptor corepressor 1 OS=Homo sapiens OX=9606 GN=NCOR1 PE=1 SV=2	1	3	3	3	2440	270	7.11	62	108.5	93.8	101	98.8	95.8	102.1
Q9NZU5	LMCD1	LIM and cysteine-rich domains protein 1 OS=Homo sapiens OX=9606 GN=LMCD1 PE=1 SV=1	40	12	14	12	365	40.8	7.93	334	101.6	96.2	97.6	103.9	98.9	101.9
Q9H857	NT5DC2	5'-nucleotidase domain-containing protein 2 OS=Homo sapiens OX=9606 GN=NT5DC2 PE=1 SV=1	8	4	4	4	520	60.7	6.77	40	100.3	98.6	98.4	105.6	99.4	97.7
Q9Y490	TLN1	Talin-1 OS=Homo sapiens OX=9606 GN=TLN1 PE=1 SV=3	75	146	335	130	2541	269.6	6.07	9795	96.2	97.8	94.4	103.4	104.5	103.7
P39060	COL18A1	Collagen alpha-1(XVIII) chain OS=Homo sapiens OX=9606 GN=COL18A1 PE=1 SV=5	1	1	1	1	1754	178.1	6.01	41	111	92	100.6	87.9	91.2	117.3
Q86V21	AACS	Acetoacetyl-CoA synthetase OS=Homo sapiens OX=9606 GN=AACS PE=1 SV=1	13	9	10	9	672	75.1	6.24	186	95.3	96.8	96.1	106.4	102.2	103.1
A6NED2	RCCD1	RCC1 domain-containing protein 1 OS=Homo sapiens OX=9606 GN=RCCD1 PE=1 SV=1	9	2	3	2	376	40.1	5.27	89	95.7	100.4	109	95.9	94.9	104
Q9Y3U8	RPL36	60S ribosomal protein L36 OS=Homo sapiens OX=9606 GN=RPL36 PE=1 SV=3	37	6	14	6	105	12.2	11.59	158	102.8	101.7	103.6	98.3	99.5	94
Q9NX08	COMMD8	COMM domain-containing protein 8 OS=Homo sapiens OX=9606 GN=COMMD8 PE=1 SV=1	28	4	6	4	183	21.1	5.43	198	100.6	101	101.9	102.2	98.9	95.4
Q99460	PSMD1	26S proteasome non-ATPase regulatory subunit 1 OS=Homo sapiens OX=9606 GN=PSMD1 PE=1 SV=2	50	39	69	39	953	105.8	5.39	1453	99.6	101.9	98.2	98.7	102.2	99.4
Q96GM8	TOE1	Target of EGR1 protein 1 OS=Homo sapiens OX=9606 GN=TOE1 PE=1 SV=1	23	9	11	9	510	56.5	7.18	227	106	106.1	108.4	87.3	95.1	97.1
P52292	KPNA2	Importin subunit alpha-1 OS=Homo sapiens OX=9606 GN=KPNA2 PE=1 SV=1	50	17	37	17	529	57.8	5.4	1016	105.4	97.1	111.7	98.6	91.7	95.4
Q99640	PKMYT1	Membrane-associated tyrosine- and threonine-specific cdc2-inhibitory kinase OS=Homo sapiens OX=9606 GN=PKMYT1 PE=1 SV=1	3	1	1	1	499	54.5	6.93	101	104.7	90.3	112.1	106	83.2	103.8
Q9BTE1	DCTN5	Dynactin subunit 5 OS=Homo sapiens OX=9606 GN=DCTN5 PE=1 SV=1	20	4	5	4	182	20.1	8.02	141	102	100	103.3	98.3	97.7	98.7
O75208	COQ9	Ubiquinone biosynthesis protein COQ9, mitochondrial OS=Homo sapiens OX=9606 GN=COQ9 PE=1 SV=1	19	5	7	5	318	35.5	5.94	118	100.6	101.9	98.3	98.1	99.3	101.8
Q9Y2S6	TMA7	Translation machinery-associated protein 7 OS=Homo sapiens OX=9606 GN=TMA7 PE=1 SV=1	30	2	4	2	64	7.1	9.99	51	93.6	103.1	100.3	101.2	103.7	98.1
P61106	RAB14	Ras-related protein Rab-14 OS=Homo sapiens OX=9606 GN=RAB14 PE=1 SV=4	85	16	25	15	215	23.9	6.21	609	99	99.3	99.8	98.7	100.6	102.5
Q86VN1	VPS36	Vacuolar protein-sorting-associated protein 36 OS=Homo sapiens OX=9606 GN=VPS36 PE=1 SV=1	27	9	13	9	386	43.8	7.2	220	99.5	98	98.4	101.4	100.2	102.5
Q9NRF9	POLE3	DNA polymerase epsilon subunit 3 OS=Homo sapiens OX=9606 GN=POLE3 PE=1 SV=1	24	3	5	3	147	16.8	4.74	185	104.6	99	106.2	100.2	93.8	96.1
O43861	ATP9B	Probable phospholipid-transporting ATPase IIB OS=Homo sapiens OX=9606 GN=ATP9B PE=2 SV=4	1	1	1	1	1147	129.2	7.61	40	91.1	95.5	95.2	105	108.6	104.6
P21333	FLNA	Filamin-A OS=Homo sapiens OX=9606 GN=FLNA PE=1 SV=4	66	133	313	116	2647	280.6	6.06	7999	100.8	96.1	100.9	98.7	102.3	101.2
P60520	GABARAPL2	Gamma-aminobutyric acid receptor-associated protein-like 2 OS=Homo sapiens OX=9606 GN=GABARAPL2 PE=1 SV=1	29	4	6	3	117	13.7	8.1	79	93.3	97.4	99.8	103.3	102.1	104.1
O94964	SOGA1	Protein SOGA1 OS=Homo sapiens OX=9606 GN=SOGA1 PE=1 SV=2	2	3	3	2	1423	159.7	6.46	50	94.5	83.8	94.4	124.9	97.5	104.9
Q9Y6M9	NDUFB9	NADH dehydrogenase [ubiquinone] 1 beta subcomplex subunit 9 OS=Homo sapiens OX=9606 GN=NDUFB9 PE=1 SV=3	25	4	5	4	179	21.8	8.38	53	97.3	98.1	97.2	102.4	102	102.9
P62917	RPL8	60S ribosomal protein L8 OS=Homo sapiens OX=9606 GN=RPL8 PE=1 SV=2	51	14	30	14	257	28	11.03	371	102.5	105.3	99.8	94	96.6	101.7
Q9NR19	ACSS2	Acetyl-coenzyme A synthetase, cytoplasmic OS=Homo sapiens OX=9606 GN=ACSS2 PE=1 SV=1	10	6	7	6	701	78.5	6.46	119	94.7	103.4	94.6	102.7	103	101.5
Q9Y426	C2CD2	C2 domain-containing protein 2 OS=Homo sapiens OX=9606 GN=C2CD2 PE=1 SV=2	2	1	1	1	696	75.5	6.92	58	91.5	134.3	94.8	83.2	100.1	96
Q96B49	TOMM6	Mitochondrial import receptor subunit TOM6 homolog OS=Homo sapiens OX=9606 GN=TOMM6 PE=1 SV=1	57	2	6	2	74	8	4.89	277	102	96	99.8	93.8	97.7	110.7
P00403	MT-CO2	Cytochrome c oxidase subunit 2 OS=Homo sapiens OX=9606 GN=MT-CO2 PE=1 SV=1	31	6	10	6	227	25.5	4.82	224	97.5	95.8	98.5	107.7	101.2	99.3
Q99576	TSC22D3	TSC22 domain family protein 3 OS=Homo sapiens OX=9606 GN=TSC22D3 PE=1 SV=2	19	3	3	2	134	14.8	4.54	52	98.4	104.9	97.8	99.9	96.3	102.7
P50402	EMD	Emerin OS=Homo sapiens OX=9606 GN=EMD PE=1 SV=1	39	8	11	8	254	29	5.5	176	99.5	98.1	97.8	101.8	103.2	99.6
Q9H081	MIS12	Protein MIS12 homolog OS=Homo sapiens OX=9606 GN=MIS12 PE=1 SV=1	16	3	4	3	205	24.1	5.69	116	99	100.3	101.1	100.5	97	102
P52948	NUP98	Nuclear pore complex protein Nup98-Nup96 OS=Homo sapiens OX=9606 GN=NUP98 PE=1 SV=4	24	34	39	34	1817	197.5	6.4	872	102.8	102.1	102.3	96.5	97.5	98.8
Q86WQ0	NR2C2AP	Nuclear receptor 2C2-associated protein OS=Homo sapiens OX=9606 GN=NR2C2AP PE=1 SV=1	41	4	4	4	139	15.9	6.16	117	99.4	95.3	102	103.5	98.6	101.1
P62241	RPS8	40S ribosomal protein S8 OS=Homo sapiens OX=9606 GN=RPS8 PE=1 SV=2	52	11	30	11	208	24.2	10.32	592	100.1	99.1	99.8	98	102.1	100.9
Q08AG7	MZT1	Mitotic-spindle organizing protein 1 OS=Homo sapiens OX=9606 GN=MZT1 PE=1 SV=2	78	4	7	4	82	8.5	4.78	248	95.4	98.1	104.6	101.1	99.2	101.5
P51148	RAB5C	Ras-related protein Rab-5C OS=Homo sapiens OX=9606 GN=RAB5C PE=1 SV=2	72	11	37	8	216	23.5	8.41	1281	93	100.5	97.5	103.8	105.3	99.9
Q8TAT6	NPLOC4	Nuclear protein localization protein 4 homolog OS=Homo sapiens OX=9606 GN=NPLOC4 PE=1 SV=3	46	24	35	24	608	68.1	6.38	719	101.6	103.5	108.2	94.4	96.3	96.1
P61576	HERV-K104	Endogenous retrovirus group K member 104 Rec protein OS=Homo sapiens OX=9606 GN=HERV-K104 PE=1 SV=1	27	1	3	1	105	11.7	9.92	0
P30046	DDT	D-dopachrome decarboxylase OS=Homo sapiens OX=9606 GN=DDT PE=1 SV=3	63	7	15	7	118	12.7	7.3	267	97.7	104.5	98.4	97.8	100.7	101
O95149	SNUPN	Snurportin-1 OS=Homo sapiens OX=9606 GN=SNUPN PE=1 SV=1	6	2	2	2	360	41.1	6.64	0
Q9Y5P6	GMPPB	Mannose-1-phosphate guanyltransferase beta OS=Homo sapiens OX=9606 GN=GMPPB PE=1 SV=2	14	4	6	4	360	39.8	6.61	164	93.4	99	93.7	99.3	106.3	108.2
O60361	NME2P1	Putative nucleoside diphosphate kinase OS=Homo sapiens OX=9606 GN=NME2P1 PE=5 SV=1	66	8	30	1	137	15.5	8.57	501	100.2	111.5	101.6	92.7	98.2	95.8
O75582	RPS6KA5	Ribosomal protein S6 kinase alpha-5 OS=Homo sapiens OX=9606 GN=RPS6KA5 PE=1 SV=1	5	3	3	2	802	89.8	7.11	42	109	99.4	102.1	95.2	93.1	101.1
Q9BRT6	LLPH	Protein LLP homolog OS=Homo sapiens OX=9606 GN=LLPH PE=1 SV=1	23	2	3	2	129	15.2	10.37	24	100.8	106.2	104.9	92.3	95.7	100.1
P51397	DAP	Death-associated protein 1 OS=Homo sapiens OX=9606 GN=DAP PE=1 SV=3	26	4	8	4	102	11.2	9.32	84	100.6	104.4	98.1	98.1	100.2	98.6
O60763	USO1	General vesicular transport factor p115 OS=Homo sapiens OX=9606 GN=USO1 PE=1 SV=2	38	33	48	33	962	107.8	4.91	1296	97.2	99	96.7	103.4	102.8	100.8
Q9UII4	HERC5	E3 ISG15--protein ligase HERC5 OS=Homo sapiens OX=9606 GN=HERC5 PE=1 SV=2	5	3	3	3	1024	116.8	7.65	52	96.1	106.7	109.3	93.8	97	97
Q9UHY1	NRBP1	Nuclear receptor-binding protein OS=Homo sapiens OX=9606 GN=NRBP1 PE=1 SV=1	32	12	21	12	535	59.8	5.08	572	99.2	99.8	103.3	99.9	97.7	100.1
Q86U86	PBRM1	Protein polybromo-1 OS=Homo sapiens OX=9606 GN=PBRM1 PE=1 SV=1	7	11	12	11	1689	192.8	6.89	155	96.7	104	104.6	97.4	95.9	101.4
Q53S33	BOLA3	BolA-like protein 3 OS=Homo sapiens OX=9606 GN=BOLA3 PE=1 SV=1	21	2	2	2	107	12.1	9.64	97	99.3	94.4	97.6	102.4	103.8	102.5
Q15121	PEA15	Astrocytic phosphoprotein PEA-15 OS=Homo sapiens OX=9606 GN=PEA15 PE=1 SV=2	78	9	21	9	130	15	5.02	465	99.8	99.4	101.9	99.4	101.5	98
Q13425	SNTB2	Beta-2-syntrophin OS=Homo sapiens OX=9606 GN=SNTB2 PE=1 SV=1	22	11	13	10	540	57.9	8.82	136	99.7	99.5	98.3	101	100.4	101.1
Q9Y5R8	TRAPPC1	Trafficking protein particle complex subunit 1 OS=Homo sapiens OX=9606 GN=TRAPPC1 PE=1 SV=1	19	3	3	3	145	16.8	9.16	53	89.7	89.8	96.7	106.2	100.4	117.2
P28300	LOX	Protein-lysine 6-oxidase OS=Homo sapiens OX=9606 GN=LOX PE=1 SV=2	2	1	1	1	417	46.9	8.09	0
O75937	DNAJC8	DnaJ homolog subfamily C member 8 OS=Homo sapiens OX=9606 GN=DNAJC8 PE=1 SV=2	46	11	16	11	253	29.8	9.06	321	101.6	102.6	105.1	96.7	97.9	96.1
Q92934	BAD	Bcl2-associated agonist of cell death OS=Homo sapiens OX=9606 GN=BAD PE=1 SV=3	21	3	3	3	168	18.4	7.15	94	94.3	100.2	96.2	102.2	104.3	102.8
Q9Y5S9	RBM8A	RNA-binding protein 8A OS=Homo sapiens OX=9606 GN=RBM8A PE=1 SV=1	32	4	6	4	174	19.9	5.72	172	101.7	102.2	103.6	98.7	97.3	96.6
O00422	SAP18	Histone deacetylase complex subunit SAP18 OS=Homo sapiens OX=9606 GN=SAP18 PE=1 SV=1	46	7	9	7	153	17.6	9.35	286	99.6	102.3	104.8	95.7	99.4	98.2
Q15020	SART3	Squamous cell carcinoma antigen recognized by T-cells 3 OS=Homo sapiens OX=9606 GN=SART3 PE=1 SV=1	27	25	31	25	963	109.9	5.57	474	102.5	103.5	108.7	94.2	95.1	96
Q92922	SMARCC1	SWI/SNF complex subunit SMARCC1 OS=Homo sapiens OX=9606 GN=SMARCC1 PE=1 SV=3	14	14	15	7	1105	122.8	5.76	251	100.7	98	102.9	100.7	97.9	99.9
O60499	STX10	Syntaxin-10 OS=Homo sapiens OX=9606 GN=STX10 PE=1 SV=1	20	4	4	3	249	28.1	4.89	57	91.2	89.1	91.3	87.9	95	145.5
Q7KZI7	MARK2	Serine/threonine-protein kinase MARK2 OS=Homo sapiens OX=9606 GN=MARK2 PE=1 SV=2	15	11	13	8	788	87.9	9.72	184	102.4	105.4	106.4	94.7	93.6	97.6
Q8TF72	SHROOM3	Protein Shroom3 OS=Homo sapiens OX=9606 GN=SHROOM3 PE=1 SV=2	1	1	1	1	1996	216.7	7.8	0
Q6P4E1	CASC4	Protein CASC4 OS=Homo sapiens OX=9606 GN=CASC4 PE=1 SV=2	6	3	3	3	436	49.5	5.29	52	98.2	95.2	96.6	107.3	101.1	101.7
P15529	CD46	Membrane cofactor protein OS=Homo sapiens OX=9606 GN=CD46 PE=1 SV=3	8	3	3	3	392	43.7	6.74	32	95.8	102.2	103.8	105.1	96.2	96.8
Q9BRK4	LZTS2	Leucine zipper putative tumor suppressor 2 OS=Homo sapiens OX=9606 GN=LZTS2 PE=1 SV=2	2	2	2	1	669	72.7	6.51	32
Q96CW1	AP2M1	AP-2 complex subunit mu OS=Homo sapiens OX=9606 GN=AP2M1 PE=1 SV=2	49	19	35	19	435	49.6	9.54	718	95.1	99.1	95.6	104	104.7	101.5
Q08257	CRYZ	Quinone oxidoreductase OS=Homo sapiens OX=9606 GN=CRYZ PE=1 SV=1	54	13	21	13	329	35.2	8.44	497	100.1	101.7	96.4	101.6	101.2	99.2
Q76FK4	NOL8	Nucleolar protein 8 OS=Homo sapiens OX=9606 GN=NOL8 PE=1 SV=1	3	3	4	2	1167	131.5	7.09	75	100.4	112.8	107.9	88.4	94.6	95.9
O43488	AKR7A2	Aflatoxin B1 aldehyde reductase member 2 OS=Homo sapiens OX=9606 GN=AKR7A2 PE=1 SV=3	28	8	11	8	359	39.6	7.17	272	100.6	102.4	98.3	97.6	102.5	98.7
P14927	UQCRB	Cytochrome b-c1 complex subunit 7 OS=Homo sapiens OX=9606 GN=UQCRB PE=1 SV=2	61	8	11	8	111	13.5	8.78	212	100.5	107.5	99.9	101.2	96.7	94.3
Q9Y3E0	GOLT1B	Vesicle transport protein GOT1B OS=Homo sapiens OX=9606 GN=GOLT1B PE=1 SV=1	7	1	1	1	138	15.4	10.36	43	97.7	105.6	97.2	100.9	96.7	101.9
P17813	ENG	Endoglin OS=Homo sapiens OX=9606 GN=ENG PE=1 SV=2	14	7	8	7	658	70.5	6.61	180	89.9	91.7	88.1	118.8	104.5	106.9
Q8IZL8	PELP1	Proline-, glutamic acid- and leucine-rich protein 1 OS=Homo sapiens OX=9606 GN=PELP1 PE=1 SV=2	14	10	10	10	1130	119.6	4.34	132	101.1	101.6	101.2	96.8	100.5	98.7
Q13595	TRA2A	Transformer-2 protein homolog alpha OS=Homo sapiens OX=9606 GN=TRA2A PE=1 SV=1	24	6	9	5	282	32.7	11.27	315	101.2	106.5	103.1	92	98.6	98.6
P43034	PAFAH1B1	Platelet-activating factor acetylhydrolase IB subunit alpha OS=Homo sapiens OX=9606 GN=PAFAH1B1 PE=1 SV=2	55	20	33	19	410	46.6	7.37	764	96.9	98.4	97	101.9	103.3	102.4
Q14318	FKBP8	Peptidyl-prolyl cis-trans isomerase FKBP8 OS=Homo sapiens OX=9606 GN=FKBP8 PE=1 SV=2	25	8	18	8	412	44.5	4.84	414	94.8	94.1	94.9	111.2	102.8	102.1
Q9NYP7	ELOVL5	Elongation of very long chain fatty acids protein 5 OS=Homo sapiens OX=9606 GN=ELOVL5 PE=1 SV=1	7	2	3	2	299	35.3	9.42	94	100.8	109.9	109.8	92.6	96.9	90
Q9NS69	TOMM22	Mitochondrial import receptor subunit TOM22 homolog OS=Homo sapiens OX=9606 GN=TOMM22 PE=1 SV=3	51	5	10	5	142	15.5	4.34	234	99.1	99.9	108	93.9	98.6	100.5
Q15386	UBE3C	Ubiquitin-protein ligase E3C OS=Homo sapiens OX=9606 GN=UBE3C PE=1 SV=3	27	19	24	19	1083	123.8	6.71	539	104.5	98.2	100.1	100.1	96.9	100.1
Q9C0E2	XPO4	Exportin-4 OS=Homo sapiens OX=9606 GN=XPO4 PE=1 SV=2	23	21	25	20	1151	130.1	5.05	479	107.9	106.6	103.7	95	94.2	92.7
Q9UMZ2	SYNRG	Synergin gamma OS=Homo sapiens OX=9606 GN=SYNRG PE=1 SV=2	9	10	10	10	1314	140.6	5.03	121	95.5	96	99.3	104.1	98.8	106.3
Q9GZP4	PITHD1	PITH domain-containing protein 1 OS=Homo sapiens OX=9606 GN=PITHD1 PE=1 SV=1	46	7	9	7	211	24.2	5.74	149	101.5	101	99.9	98.3	98.5	100.8
Q16877	PFKFB4	6-phosphofructo-2-kinase/fructose-2,6-bisphosphatase 4 OS=Homo sapiens OX=9606 GN=PFKFB4 PE=2 SV=6	11	5	5	3	469	54	6.62	65	89.1	99.4	100.1	112.3	98.7	100.4
O75330	HMMR	Hyaluronan mediated motility receptor OS=Homo sapiens OX=9606 GN=HMMR PE=1 SV=2	2	1	1	1	724	84	5.83	0	104.9	111.8	109.8	92.9	95.8	84.7
Q13443	ADAM9	Disintegrin and metalloproteinase domain-containing protein 9 OS=Homo sapiens OX=9606 GN=ADAM9 PE=1 SV=1	16	9	10	9	819	90.5	7.52	224	93	92.7	91.2	113.8	106	103.3
P25205	MCM3	DNA replication licensing factor MCM3 OS=Homo sapiens OX=9606 GN=MCM3 PE=1 SV=3	32	23	31	23	808	90.9	5.77	673	98.6	94.5	107.6	99.6	95.1	104.5
P34949	MPI	Mannose-6-phosphate isomerase OS=Homo sapiens OX=9606 GN=MPI PE=1 SV=2	31	10	12	10	423	46.6	5.95	343	95.2	100.9	94.8	107.6	99.7	101.8
Q9Y619	SLC25A15	Mitochondrial ornithine transporter 1 OS=Homo sapiens OX=9606 GN=SLC25A15 PE=1 SV=1	13	4	4	4	301	32.7	9.13	78	102.2	97.7	99.1	102.5	98.3	100.2
Q92878	RAD50	DNA repair protein RAD50 OS=Homo sapiens OX=9606 GN=RAD50 PE=1 SV=1	39	51	59	51	1312	153.8	6.89	1131	98	98.2	95.4	102.3	102.8	103.2
Q16537	PPP2R5E	Serine/threonine-protein phosphatase 2A 56 kDa regulatory subunit epsilon isoform OS=Homo sapiens OX=9606 GN=PPP2R5E PE=1 SV=1	20	8	9	8	467	54.7	6.95	166	100.2	100.1	103.6	96.8	101.4	97.8
Q9NPR9	GPR108	Protein GPR108 OS=Homo sapiens OX=9606 GN=GPR108 PE=2 SV=3	3	2	2	2	543	60.6	8.69	21	103	102.1	98.3	101.4	99.3	95.9
Q15813	TBCE	Tubulin-specific chaperone E OS=Homo sapiens OX=9606 GN=TBCE PE=1 SV=1	52	22	30	22	527	59.3	6.76	680	96.4	99.9	98.7	99.9	100.8	104.3
P55209	NAP1L1	Nucleosome assembly protein 1-like 1 OS=Homo sapiens OX=9606 GN=NAP1L1 PE=1 SV=1	38	14	51	13	391	45.3	4.46	1282	104.2	106.1	105.1	93.6	96.6	94.5
Q9Y6Q5	AP1M2	AP-1 complex subunit mu-2 OS=Homo sapiens OX=9606 GN=AP1M2 PE=1 SV=4	9	4	4	1	423	48.1	8.22	70	97.3	100.1	103.5	98.4	99.1	101.6
P18433	PTPRA	Receptor-type tyrosine-protein phosphatase alpha OS=Homo sapiens OX=9606 GN=PTPRA PE=1 SV=3	8	5	6	4	802	90.7	6.65	130	99.1	103.9	99.5	101.2	96.1	100.2
Q96F10	SAT2	Diamine acetyltransferase 2 OS=Homo sapiens OX=9606 GN=SAT2 PE=1 SV=1	24	3	3	3	170	19.1	6.04	65	97.3	100.8	102.3	106.8	89.1	103.8
Q86UY6	NAA40	N-alpha-acetyltransferase 40 OS=Homo sapiens OX=9606 GN=NAA40 PE=1 SV=1	16	3	4	3	237	27.2	7.39	95	102.5	103.3	105.9	96.9	95.4	96
P32322	PYCR1	Pyrroline-5-carboxylate reductase 1, mitochondrial OS=Homo sapiens OX=9606 GN=PYCR1 PE=1 SV=2	31	7	11	6	319	33.3	7.61	353	102.7	100.5	106	88.7	95.5	106.5
P11766	ADH5	Alcohol dehydrogenase class-3 OS=Homo sapiens OX=9606 GN=ADH5 PE=1 SV=4	48	14	27	14	374	39.7	7.49	449	94.2	98	92.1	106	105.2	104.4
Q13371	PDCL	Phosducin-like protein OS=Homo sapiens OX=9606 GN=PDCL PE=1 SV=3	7	2	3	2	301	34.3	4.73	75	104.2	102.4	106.8	90	97	99.6
Q8WXG6	MADD	MAP kinase-activating death domain protein OS=Homo sapiens OX=9606 GN=MADD PE=1 SV=2	11	14	17	14	1647	183.2	6.04	260	100.4	102.7	101.5	98.9	96.9	99.5
P06744	GPI	Glucose-6-phosphate isomerase OS=Homo sapiens OX=9606 GN=GPI PE=1 SV=4	44	26	57	26	558	63.1	8.32	1199	100.6	104.3	97.3	100.1	100.5	97.2
O95757	HSPA4L	Heat shock 70 kDa protein 4L OS=Homo sapiens OX=9606 GN=HSPA4L PE=1 SV=3	61	41	70	36	839	94.5	5.88	1706	98.4	97.5	104.5	97	101.7	100.8
Q8WW24	TEKT4	Tektin-4 OS=Homo sapiens OX=9606 GN=TEKT4 PE=1 SV=1	2	1	1	1	435	50.6	6.44	0	92.6	90.1	97.2	118.2	99.2	102.8
Q9Y2B9	PKIG	cAMP-dependent protein kinase inhibitor gamma OS=Homo sapiens OX=9606 GN=PKIG PE=2 SV=1	21	1	1	1	76	7.9	4.25	46
P32321	DCTD	Deoxycytidylate deaminase OS=Homo sapiens OX=9606 GN=DCTD PE=1 SV=2	31	4	5	4	178	20	7.56	99	100.7	100.7	98.8	99.2	100.8	99.8
P46934	NEDD4	E3 ubiquitin-protein ligase NEDD4 OS=Homo sapiens OX=9606 GN=NEDD4 PE=1 SV=4	8	10	14	8	1319	149	6.58	239	84.5	89.3	93.1	110	110.4	112.7
Q5UCC4	EMC10	ER membrane protein complex subunit 10 OS=Homo sapiens OX=9606 GN=EMC10 PE=1 SV=1	22	4	6	4	262	27.3	6.13	98	101.9	98.2	98.5	102.3	99.1	100
P17066	HSPA6	Heat shock 70 kDa protein 6 OS=Homo sapiens OX=9606 GN=HSPA6 PE=1 SV=2	22	14	51	3	643	71	6.14	880	101.4	82.9	159.4	74.5	83.9	98
P16949	STMN1	Stathmin OS=Homo sapiens OX=9606 GN=STMN1 PE=1 SV=3	79	19	58	19	149	17.3	5.97	840	89.5	93.6	94.1	108.4	107.8	106.6
O75175	CNOT3	CCR4-NOT transcription complex subunit 3 OS=Homo sapiens OX=9606 GN=CNOT3 PE=1 SV=1	13	9	9	9	753	81.8	6.2	208	104.7	103.2	107.9	95.5	93.8	94.8
Q13625	TP53BP2	Apoptosis-stimulating of p53 protein 2 OS=Homo sapiens OX=9606 GN=TP53BP2 PE=1 SV=2	7	6	7	6	1128	125.5	6.07	170	100.6	96.4	100	103.8	100	99.3
Q96ND0	FAM210A	Protein FAM210A OS=Homo sapiens OX=9606 GN=FAM210A PE=1 SV=2	11	3	3	3	272	30.8	9.76	95	101.1	99.2	101.1	98.1	100.1	100.4
P07199	CENPB	Major centromere autoantigen B OS=Homo sapiens OX=9606 GN=CENPB PE=1 SV=2	9	4	4	4	599	65.1	4.55	77	104.4	105.7	99.8	96.2	96.3	97.6
Q9Y6G5	COMMD10	COMM domain-containing protein 10 OS=Homo sapiens OX=9606 GN=COMMD10 PE=1 SV=1	27	4	5	4	202	23	6.54	107	100	95	99	110.9	100.4	94.8
P62304	SNRPE	Small nuclear ribonucleoprotein E OS=Homo sapiens OX=9606 GN=SNRPE PE=1 SV=1	65	4	16	4	92	10.8	9.44	314	105.8	110.3	105.7	93.3	92.6	92.2
Q8N8N7	PTGR2	Prostaglandin reductase 2 OS=Homo sapiens OX=9606 GN=PTGR2 PE=1 SV=1	20	6	8	6	351	38.5	5.41	111	99.9	98.8	98.1	99.7	102.1	101.5
P33992	MCM5	DNA replication licensing factor MCM5 OS=Homo sapiens OX=9606 GN=MCM5 PE=1 SV=5	30	17	22	17	734	82.2	8.37	463	100	99.7	102.2	101.1	93.8	103.1
P51956	NEK3	Serine/threonine-protein kinase Nek3 OS=Homo sapiens OX=9606 GN=NEK3 PE=1 SV=2	5	1	1	1	506	57.7	7.17	116	94.3	99.3	92	102.3	108.5	103.5
Q96DT6	ATG4C	Cysteine protease ATG4C OS=Homo sapiens OX=9606 GN=ATG4C PE=1 SV=1	2	1	1	1	458	52.5	5.97	46	89.7	105.3	129.2	94	87.1	94.7
Q15370	ELOB	Elongin-B OS=Homo sapiens OX=9606 GN=ELOB PE=1 SV=1	91	8	10	8	118	13.1	4.88	133	96.5	98.8	97.3	99.4	109.8	98.1
P16278	GLB1	Beta-galactosidase OS=Homo sapiens OX=9606 GN=GLB1 PE=1 SV=2	12	6	10	6	677	76	6.57	171	96.9	96.6	96.5	106.3	102.7	101
Q14393	GAS6	Growth arrest-specific protein 6 OS=Homo sapiens OX=9606 GN=GAS6 PE=1 SV=3	2	1	1	1	678	74.9	5.69	34	94.8	94.7	87.2	118.5	99.7	105.1
O75298	RTN2	Reticulon-2 OS=Homo sapiens OX=9606 GN=RTN2 PE=1 SV=1	3	1	1	1	545	59.2	5.31	28	100.3	109.2	98.8	95	93.6	103.1
Q13216	ERCC8	DNA excision repair protein ERCC-8 OS=Homo sapiens OX=9606 GN=ERCC8 PE=1 SV=1	5	1	1	1	396	44	6.35	27	97.9	103.5	101.4	101.2	94.1	101.9
P04049	RAF1	RAF proto-oncogene serine/threonine-protein kinase OS=Homo sapiens OX=9606 GN=RAF1 PE=1 SV=1	10	7	7	4	648	73	9.2	114	105.7	104.1	118	87.6	93.3	91.3
Q92608	DOCK2	Dedicator of cytokinesis protein 2 OS=Homo sapiens OX=9606 GN=DOCK2 PE=1 SV=2	1	2	2	2	1830	211.8	6.87	0	100	100.2	102.1	93.8	101.4	102.6
P16219	ACADS	Short-chain specific acyl-CoA dehydrogenase, mitochondrial OS=Homo sapiens OX=9606 GN=ACADS PE=1 SV=1	3	1	1	1	412	44.3	7.99	40	112.6	109.9	105.8	92.4	87.5	91.8
Q14289	PTK2B	Protein-tyrosine kinase 2-beta OS=Homo sapiens OX=9606 GN=PTK2B PE=1 SV=2	2	2	2	1	1009	115.8	6.25	67	94.5	93.9	99.1	108.8	97.6	106.2
Q8IYJ2	C10orf67	Uncharacterized protein C10orf67, mitochondrial OS=Homo sapiens OX=9606 GN=C10orf67 PE=1 SV=3	2	1	1	1	551	63.6	8.84	0	103.3	86.8	97.5	116	98.4	98
Q969F9	HPS3	Hermansky-Pudlak syndrome 3 protein OS=Homo sapiens OX=9606 GN=HPS3 PE=1 SV=1	5	3	3	3	1004	113.7	6.43	80	93.8	94.8	105.9	103.4	99.1	103
Q5JU85	IQSEC2	IQ motif and SEC7 domain-containing protein 2 OS=Homo sapiens OX=9606 GN=IQSEC2 PE=1 SV=2	1	1	1	1	1488	162.7	8.56	17	103.6	103	101.2	95.4	93.4	103.3
Q93015	NAA80	N-alpha-acetyltransferase 80 OS=Homo sapiens OX=9606 GN=NAA80 PE=1 SV=2	10	2	2	2	286	31.4	7.85	26	94.6	98.6	97.1	105.8	100.9	103
Q92547	TOPBP1	DNA topoisomerase 2-binding protein 1 OS=Homo sapiens OX=9606 GN=TOPBP1 PE=1 SV=3	1	1	1	1	1522	170.6	6.96	35
P29317	EPHA2	Ephrin type-A receptor 2 OS=Homo sapiens OX=9606 GN=EPHA2 PE=1 SV=2	27	20	24	17	976	108.2	6.23	546	116	102.5	116.5	86.9	88.5	89.5
Q9UMR2	DDX19B	ATP-dependent RNA helicase DDX19B OS=Homo sapiens OX=9606 GN=DDX19B PE=1 SV=1	39	15	24	2	479	53.9	6.3	567	95.1	107.6	103.3	103.6	94.6	95.9
P62312	LSM6	U6 snRNA-associated Sm-like protein LSm6 OS=Homo sapiens OX=9606 GN=LSM6 PE=1 SV=1	44	5	7	5	80	9.1	9.58	90	91.6	102.6	99.5	105.2	100.9	100.1
Q6IAN0	DHRS7B	Dehydrogenase/reductase SDR family member 7B OS=Homo sapiens OX=9606 GN=DHRS7B PE=1 SV=2	20	6	7	6	325	35.1	9.55	190	96.5	94.8	96.7	106.5	105.4	100.1
Q9P1Z9	CCDC180	Coiled-coil domain-containing protein 180 OS=Homo sapiens OX=9606 GN=CCDC180 PE=2 SV=3	0	1	1	1	1701	197.2	6.04	0	109.5	95.8	95.8	98	98.5	102.4
Q96H96	COQ2	4-hydroxybenzoate polyprenyltransferase, mitochondrial OS=Homo sapiens OX=9606 GN=COQ2 PE=1 SV=1	2	1	1	1	371	40.5	9.13	0
P51452	DUSP3	Dual specificity protein phosphatase 3 OS=Homo sapiens OX=9606 GN=DUSP3 PE=1 SV=1	44	6	10	6	185	20.5	7.8	344	90.9	94.9	90.8	110.2	108.2	105.1
P13645	KRT10	Keratin, type I cytoskeletal 10 OS=Homo sapiens OX=9606 GN=KRT10 PE=1 SV=6	48	23	37	20	584	58.8	5.21	941	145.2	94.8	95.1	82	80	102.9
Q13541	EIF4EBP1	Eukaryotic translation initiation factor 4E-binding protein 1 OS=Homo sapiens OX=9606 GN=EIF4EBP1 PE=1 SV=3	16	2	2	2	118	12.6	5.48	54	98.6	100.7	100.5	96.8	100.2	103.2
Q01973	ROR1	Inactive tyrosine-protein kinase transmembrane receptor ROR1 OS=Homo sapiens OX=9606 GN=ROR1 PE=1 SV=2	5	4	4	4	937	104.2	7.17	87	108	111.1	112.3	90.5	87.3	90.8
Q13057	COASY	Bifunctional coenzyme A synthase OS=Homo sapiens OX=9606 GN=COASY PE=1 SV=4	15	6	7	6	564	62.3	6.99	135	114	110.4	110	87.8	87.3	90.6
Q15036	SNX17	Sorting nexin-17 OS=Homo sapiens OX=9606 GN=SNX17 PE=1 SV=1	26	10	12	10	470	52.9	7.46	315	94	89.9	98.3	111	100.7	106.1
Q9BYT3	STK33	Serine/threonine-protein kinase 33 OS=Homo sapiens OX=9606 GN=STK33 PE=1 SV=1	4	2	2	2	514	57.8	7.03	19	89.9	83.9	102.3	113.9	106.4	103.5
Q15904	ATP6AP1	V-type proton ATPase subunit S1 OS=Homo sapiens OX=9606 GN=ATP6AP1 PE=1 SV=2	14	6	6	6	470	52	6.14	115	94.8	93.5	96.3	105.4	99.8	110.1
Q68E01	INTS3	Integrator complex subunit 3 OS=Homo sapiens OX=9606 GN=INTS3 PE=1 SV=1	14	9	10	9	1043	118	5.8	220	102.8	96.7	102.2	100.7	94.6	103.1
P26006	ITGA3	Integrin alpha-3 OS=Homo sapiens OX=9606 GN=ITGA3 PE=1 SV=5	22	20	30	20	1051	116.5	6.77	554	107.6	106.7	100.1	96.2	94.6	94.8
Q03167	TGFBR3	Transforming growth factor beta receptor type 3 OS=Homo sapiens OX=9606 GN=TGFBR3 PE=1 SV=3	2	2	2	2	851	93.4	5.71	43	93.3	94.8	91.9	110.5	101.4	108.2
Q07352	ZFP36L1	mRNA decay activator protein ZFP36L1 OS=Homo sapiens OX=9606 GN=ZFP36L1 PE=1 SV=1	26	7	8	6	338	36.3	7.96	173	108.9	97.8	101.8	90.4	97.8	103.3
O60716	CTNND1	Catenin delta-1 OS=Homo sapiens OX=9606 GN=CTNND1 PE=1 SV=1	38	27	35	27	968	108.1	6.23	749	98.1	99.7	98.8	102.2	99.1	102.1
Q9BSV6	TSEN34	tRNA-splicing endonuclease subunit Sen34 OS=Homo sapiens OX=9606 GN=TSEN34 PE=1 SV=1	37	9	11	9	310	33.6	8.43	254	104.4	98	103.6	97.4	95.4	101.3
Q9BTV4	TMEM43	Transmembrane protein 43 OS=Homo sapiens OX=9606 GN=TMEM43 PE=1 SV=1	48	17	24	17	400	44.8	8.13	500	96.2	96.4	92.1	104.4	105	105.9
Q8IUR7	ARMC8	Armadillo repeat-containing protein 8 OS=Homo sapiens OX=9606 GN=ARMC8 PE=1 SV=2	13	6	7	6	673	75.5	6.73	249	97.2	94.2	96.9	105.5	104	102.2
Q6NUQ1	RINT1	RAD50-interacting protein 1 OS=Homo sapiens OX=9606 GN=RINT1 PE=1 SV=1	7	4	5	4	792	90.6	5.45	125	102	101.8	99.3	96.8	99.3	100.7
P33764	S100A3	Protein S100-A3 OS=Homo sapiens OX=9606 GN=S100A3 PE=1 SV=1	51	5	6	5	101	11.7	4.78	107	95.3	105.6	96.2	100.7	101.7	100.5
P42566	EPS15	Epidermal growth factor receptor substrate 15 OS=Homo sapiens OX=9606 GN=EPS15 PE=1 SV=2	38	27	37	27	896	98.6	4.64	850	99.6	100.1	97	100.5	101.8	101
Q15560	TCEA2	Transcription elongation factor A protein 2 OS=Homo sapiens OX=9606 GN=TCEA2 PE=1 SV=1	10	3	6	1	299	33.6	9.13	172	106.7	102.6	103.3	95	92.2	100.3
Q96GK7	FAHD2A	Fumarylacetoacetate hydrolase domain-containing protein 2A OS=Homo sapiens OX=9606 GN=FAHD2A PE=1 SV=1	38	11	16	11	314	34.6	8.24	300	100	98.6	96.6	102.4	101.7	100.7
Q9UBL3	ASH2L	Set1/Ash2 histone methyltransferase complex subunit ASH2 OS=Homo sapiens OX=9606 GN=ASH2L PE=1 SV=1	17	10	11	10	628	68.7	5.69	245	102	103.6	102.9	97.2	99.2	95
Q96D96	HVCN1	Voltage-gated hydrogen channel 1 OS=Homo sapiens OX=9606 GN=HVCN1 PE=1 SV=1	5	1	1	1	273	31.7	6.8	36	97	97.7	94.7	102.3	100.6	107.8
Q5VWQ8	DAB2IP	Disabled homolog 2-interacting protein OS=Homo sapiens OX=9606 GN=DAB2IP PE=1 SV=2	2	3	4	2	1189	131.5	8.72	52	100.7	102.3	103.4	92.8	95.9	104.9
O60906	SMPD2	Sphingomyelin phosphodiesterase 2 OS=Homo sapiens OX=9606 GN=SMPD2 PE=1 SV=2	3	1	1	1	423	47.6	6.98	37	102.6	93.8	109.1	96.5	89.7	108.4
P50993	ATP1A2	Sodium/potassium-transporting ATPase subunit alpha-2 OS=Homo sapiens OX=9606 GN=ATP1A2 PE=1 SV=1	18	15	38	1	1020	112.2	5.66	1376	99.5	106.8	94.5	97.2	100.9	101.2
Q9BV20	MRI1	Methylthioribose-1-phosphate isomerase OS=Homo sapiens OX=9606 GN=MRI1 PE=1 SV=1	13	4	5	4	369	39.1	6.3	106	98.3	101	98.9	102.3	102.5	96.9
P05109	S100A8	Protein S100-A8 OS=Homo sapiens OX=9606 GN=S100A8 PE=1 SV=1	12	1	1	1	93	10.8	7.03	22	77.5	73.7	73.4	71.9	70.4	233.1
Q13618	CUL3	Cullin-3 OS=Homo sapiens OX=9606 GN=CUL3 PE=1 SV=2	22	15	18	15	768	88.9	8.48	430	102.1	98.8	101.4	100.8	97.1	99.8
O95816	BAG2	BAG family molecular chaperone regulator 2 OS=Homo sapiens OX=9606 GN=BAG2 PE=1 SV=1	47	10	18	10	211	23.8	6.7	541	101.2	100.7	106.8	97.1	98.5	95.7
Q969G3	SMARCE1	SWI/SNF-related matrix-associated actin-dependent regulator of chromatin subfamily E member 1 OS=Homo sapiens OX=9606 GN=SMARCE1 PE=1 SV=2	22	6	10	6	411	46.6	4.88	271	102.1	100.3	99.5	100.9	98.1	99.1
Q8TDX7	NEK7	Serine/threonine-protein kinase Nek7 OS=Homo sapiens OX=9606 GN=NEK7 PE=1 SV=1	34	8	9	6	302	34.5	8.25	88	91.6	102.3	104.1	100.6	97.2	104.2
Q86VP1	TAX1BP1	Tax1-binding protein 1 OS=Homo sapiens OX=9606 GN=TAX1BP1 PE=1 SV=2	9	7	7	7	789	90.8	5.43	38	97.6	95.2	108.8	95.7	94.2	108.5
P61006	RAB8A	Ras-related protein Rab-8A OS=Homo sapiens OX=9606 GN=RAB8A PE=1 SV=1	49	11	29	5	207	23.7	9.07	733	95.8	101	99.7	100.2	102.7	100.6
Q14690	PDCD11	Protein RRP5 homolog OS=Homo sapiens OX=9606 GN=PDCD11 PE=1 SV=3	13	19	21	19	1871	208.6	8.87	261	106.5	94.3	103.1	102	92	102.1
Q8TE73	DNAH5	Dynein heavy chain 5, axonemal OS=Homo sapiens OX=9606 GN=DNAH5 PE=1 SV=3	0	2	2	1	4624	528.7	6.1	0	98.4	89	91.8	116.2	101.2	103.4
Q9Y6E0	STK24	Serine/threonine-protein kinase 24 OS=Homo sapiens OX=9606 GN=STK24 PE=1 SV=1	40	14	24	8	443	49.3	5.69	736	102.7	101.6	100.4	96.7	98.2	100.4
Q5HYK7	SH3D19	SH3 domain-containing protein 19 OS=Homo sapiens OX=9606 GN=SH3D19 PE=1 SV=2	2	2	2	2	790	86.5	8.32	23	97.6	98.4	101	89.3	90.7	122.9
P18077	RPL35A	60S ribosomal protein L35a OS=Homo sapiens OX=9606 GN=RPL35A PE=1 SV=2	46	6	13	6	110	12.5	11.06	135	102.6	106.7	104.4	92.7	99.7	93.9
Q9NXE8	CWC25	Pre-mRNA-splicing factor CWC25 homolog OS=Homo sapiens OX=9606 GN=CWC25 PE=1 SV=1	2	1	1	1	425	49.6	10.18	26	100.4	100.2	110.3	93.6	96.8	98.7
Q9BZI7	UPF3B	Regulator of nonsense transcripts 3B OS=Homo sapiens OX=9606 GN=UPF3B PE=1 SV=1	14	6	6	6	483	57.7	9.48	54	97.8	95.9	102.4	94.1	96.7	113.1
Q9ULW3	ABT1	Activator of basal transcription 1 OS=Homo sapiens OX=9606 GN=ABT1 PE=1 SV=1	9	3	4	3	272	31.1	9.88	30	99.6	92.4	101.8	100.1	101	105.1
Q96EM0	L3HYPDH	Trans-3-hydroxy-L-proline dehydratase OS=Homo sapiens OX=9606 GN=L3HYPDH PE=1 SV=2	3	1	1	1	354	38.1	6.68	0	94.9	95.5	104.6	96.9	102.3	105.7
Q8TDB6	DTX3L	E3 ubiquitin-protein ligase DTX3L OS=Homo sapiens OX=9606 GN=DTX3L PE=1 SV=1	2	1	1	1	740	83.5	8.06	49	98.6	85.2	93.8	113.4	107.4	101.7
Q92664	GTF3A	Transcription factor IIIA OS=Homo sapiens OX=9606 GN=GTF3A PE=1 SV=3	2	1	1	1	365	41.5	9.14	0
O60427	FADS1	Acyl-CoA (8-3)-desaturase OS=Homo sapiens OX=9606 GN=FADS1 PE=1 SV=3	2	1	1	1	444	51.9	8.87	0	92.9	94.8	106.7	103.9	100	101.6
P55327	TPD52	Tumor protein D52 OS=Homo sapiens OX=9606 GN=TPD52 PE=1 SV=2	44	8	13	8	224	24.3	4.83	415	99.8	106.2	99.8	98.8	98.9	96.5
Q86SE9	PCGF5	Polycomb group RING finger protein 5 OS=Homo sapiens OX=9606 GN=PCGF5 PE=1 SV=1	4	1	1	1	256	29.7	6.52	27	112.2	106.4	106.8	79.8	97.5	97.3
O43314	PPIP5K2	Inositol hexakisphosphate and diphosphoinositol-pentakisphosphate kinase 2 OS=Homo sapiens OX=9606 GN=PPIP5K2 PE=1 SV=3	11	11	12	9	1243	140.3	8.22	272	93	97	97.2	101.4	105.3	106.1
Q16890	TPD52L1	Tumor protein D53 OS=Homo sapiens OX=9606 GN=TPD52L1 PE=1 SV=1	7	1	1	1	204	22.4	5.62	41	97.1	115	113	81.1	89.7	104.1
Q6T4R5	NHS	Nance-Horan syndrome protein OS=Homo sapiens OX=9606 GN=NHS PE=1 SV=2	1	1	1	1	1651	179	6.86	0	93.4	93.3	96.9	105.6	104.7	106.2
Q9BUR4	WRAP53	Telomerase Cajal body protein 1 OS=Homo sapiens OX=9606 GN=WRAP53 PE=1 SV=1	12	4	4	4	548	59.3	4.58	60	98.5	96.1	101.2	103.2	96.2	104.8
P50443	SLC26A2	Sulfate transporter OS=Homo sapiens OX=9606 GN=SLC26A2 PE=1 SV=2	3	1	1	1	739	81.6	8.38	44	106.3	96.9	100.4	97.9	106.4	92.1
P25942	CD40	Tumor necrosis factor receptor superfamily member 5 OS=Homo sapiens OX=9606 GN=CD40 PE=1 SV=1	16	3	3	3	277	30.6	5.76	61	102.3	98.8	102.9	103.3	95.2	97.5
P51665	PSMD7	26S proteasome non-ATPase regulatory subunit 7 OS=Homo sapiens OX=9606 GN=PSMD7 PE=1 SV=2	27	9	13	9	324	37	6.77	299	100.6	101.6	101.1	99.9	102	94.9
P62847	RPS24	40S ribosomal protein S24 OS=Homo sapiens OX=9606 GN=RPS24 PE=1 SV=1	35	5	19	5	133	15.4	10.78	436	100.3	100.5	102.3	99	100	97.9
O15371	EIF3D	Eukaryotic translation initiation factor 3 subunit D OS=Homo sapiens OX=9606 GN=EIF3D PE=1 SV=1	45	17	32	17	548	63.9	6.05	1113	106.4	98.9	107.8	95.9	96.7	94.3
Q9NRL2	BAZ1A	Bromodomain adjacent to zinc finger domain protein 1A OS=Homo sapiens OX=9606 GN=BAZ1A PE=1 SV=2	4	4	4	4	1556	178.6	6.6	66	97.6	97.4	104.1	92.9	91.2	116.7
O75044	SRGAP2	SLIT-ROBO Rho GTPase-activating protein 2 OS=Homo sapiens OX=9606 GN=SRGAP2 PE=1 SV=3	16	14	15	12	1071	120.8	6.7	305	101.9	105.8	102	95.4	97.2	97.6
P53816	PLAAT3	Phospholipase A and acyltransferase 3 OS=Homo sapiens OX=9606 GN=PLAAT3 PE=1 SV=2	7	1	2	1	162	17.9	7.99	93	103.8	96.8	112.5	92.7	94.8	99.2
Q92974	ARHGEF2	Rho guanine nucleotide exchange factor 2 OS=Homo sapiens OX=9606 GN=ARHGEF2 PE=1 SV=4	39	32	43	32	986	111.5	7.27	888	112.3	100.2	104.9	93.2	93.2	96.2
O94903	PLPBP	Pyridoxal phosphate homeostasis protein OS=Homo sapiens OX=9606 GN=PLPBP PE=1 SV=1	40	9	11	9	275	30.3	7.5	337	96.8	96.4	100	101.8	104.4	100.6
Q8N122	RPTOR	Regulatory-associated protein of mTOR OS=Homo sapiens OX=9606 GN=RPTOR PE=1 SV=1	3	4	4	4	1335	148.9	6.89	14	108.7	105.9	100.2	96.4	93	95.8
Q8N4P3	HDDC3	Guanosine-3',5'-bis(diphosphate) 3'-pyrophosphohydrolase MESH1 OS=Homo sapiens OX=9606 GN=HDDC3 PE=1 SV=3	20	3	3	3	179	20.3	6.74	111	110	109.3	107.1	95.4	89.1	89
Q9UGN5	PARP2	Poly [ADP-ribose] polymerase 2 OS=Homo sapiens OX=9606 GN=PARP2 PE=1 SV=2	8	3	4	3	583	66.2	8.88	80	101.9	102.4	107	103.9	88	96.8
P62979	RPS27A	Ubiquitin-40S ribosomal protein S27a OS=Homo sapiens OX=9606 GN=RPS27A PE=1 SV=2	52	8	113	2	156	18	9.64	1572	101.8	94.3	99.1	101.2	105.1	98.5
Q13416	ORC2	Origin recognition complex subunit 2 OS=Homo sapiens OX=9606 GN=ORC2 PE=1 SV=2	17	8	9	8	577	65.9	6.51	243	105.3	103.9	104.1	99.2	89.9	97.6
Q93074	MED12	Mediator of RNA polymerase II transcription subunit 12 OS=Homo sapiens OX=9606 GN=MED12 PE=1 SV=4	2	4	4	4	2177	242.9	7.05	19	96.5	100.8	104.5	91.4	97.1	109.5
P04264	KRT1	Keratin, type II cytoskeletal 1 OS=Homo sapiens OX=9606 GN=KRT1 PE=1 SV=6	39	24	48	19	644	66	8.12	1084	259.9	81.6	67.8	64.1	55.3	71.2
Q96EY5	MVB12A	Multivesicular body subunit 12A OS=Homo sapiens OX=9606 GN=MVB12A PE=1 SV=1	44	7	14	7	273	28.8	8.91	347	100.8	102	99.6	101.8	98.1	97.7
P36578	RPL4	60S ribosomal protein L4 OS=Homo sapiens OX=9606 GN=RPL4 PE=1 SV=5	51	25	59	25	427	47.7	11.06	1110	104.8	103.9	103	94.8	97.4	96
P17987	TCP1	T-complex protein 1 subunit alpha OS=Homo sapiens OX=9606 GN=TCP1 PE=1 SV=1	73	32	97	32	556	60.3	6.11	3241	102.4	103.1	103.5	95.8	98.1	97
Q6P9A2	GALNT18	Polypeptide N-acetylgalactosaminyltransferase 18 OS=Homo sapiens OX=9606 GN=GALNT18 PE=2 SV=2	1	1	1	1	607	69.5	6.49	0	115.6	115.5	106.3	85.6	91.5	85.6
Q7Z3B4	NUP54	Nucleoporin p54 OS=Homo sapiens OX=9606 GN=NUP54 PE=1 SV=2	36	15	22	15	507	55.4	7.02	601	99.1	100.5	99.6	98.5	100.5	101.8
Q9H1J1	UPF3A	Regulator of nonsense transcripts 3A OS=Homo sapiens OX=9606 GN=UPF3A PE=1 SV=1	6	2	2	2	476	54.7	9.03	16	100.4	95.4	99.5	100.7	97.1	106.9
Q9Y6K9	IKBKG	NF-kappa-B essential modulator OS=Homo sapiens OX=9606 GN=IKBKG PE=1 SV=2	30	11	13	11	419	48.2	5.71	214	90	91	93.6	100.3	103.7	121.3
O00257	CBX4	E3 SUMO-protein ligase CBX4 OS=Homo sapiens OX=9606 GN=CBX4 PE=1 SV=3	4	1	1	1	560	61.3	9.36	33	103.1	108.1	106.8	84.8	96.6	100.6
P03886	MT-ND1	NADH-ubiquinone oxidoreductase chain 1 OS=Homo sapiens OX=9606 GN=MT-ND1 PE=1 SV=1	6	2	2	2	318	35.6	6.55	52	106.6	110.8	95.4	96.8	94.9	95.6
Q9HB40	SCPEP1	Retinoid-inducible serine carboxypeptidase OS=Homo sapiens OX=9606 GN=SCPEP1 PE=1 SV=1	9	3	3	3	452	50.8	5.81	105	95.2	94.6	91.4	117.1	100.5	101.2
B7ZAQ6	GPR89A	Golgi pH regulator A OS=Homo sapiens OX=9606 GN=GPR89A PE=1 SV=2	14	4	4	4	455	52.9	9.28	119	96.8	92.9	94.5	108.9	100.8	106.1
Q9BVI4	NOC4L	Nucleolar complex protein 4 homolog OS=Homo sapiens OX=9606 GN=NOC4L PE=1 SV=1	15	6	7	6	516	58.4	7.49	186	108.4	103.3	109.9	91.9	89.3	97.2
O43427	FIBP	Acidic fibroblast growth factor intracellular-binding protein OS=Homo sapiens OX=9606 GN=FIBP PE=1 SV=3	18	7	8	7	364	41.9	6.48	99	100.7	96.6	100.4	102.2	100.5	99.7
P05386	RPLP1	60S acidic ribosomal protein P1 OS=Homo sapiens OX=9606 GN=RPLP1 PE=1 SV=1	95	5	29	4	114	11.5	4.32	946	108.5	117.3	108.6	87.9	90.8	86.9
P78325	ADAM8	Disintegrin and metalloproteinase domain-containing protein 8 OS=Homo sapiens OX=9606 GN=ADAM8 PE=1 SV=2	3	1	1	1	824	88.7	7.55	16	96.5	100	103.7	95.6	101.4	102.7
Q8WXD5	GEMIN6	Gem-associated protein 6 OS=Homo sapiens OX=9606 GN=GEMIN6 PE=1 SV=1	7	1	1	1	167	18.8	5.12	27	106.2	103.6	102.8	98.4	93.7	95.4
P16157	ANK1	Ankyrin-1 OS=Homo sapiens OX=9606 GN=ANK1 PE=1 SV=3	1	1	1	1	1881	206.1	6.01	0	96.7	97.4	101.9	100.9	101.3	101.8
P60059	SEC61G	Protein transport protein Sec61 subunit gamma OS=Homo sapiens OX=9606 GN=SEC61G PE=1 SV=1	37	2	7	2	68	7.7	9.99	168	110.3	100.4	101	95.7	89	103.5
Q14116	IL18	Interleukin-18 OS=Homo sapiens OX=9606 GN=IL18 PE=1 SV=1	56	9	13	9	193	22.3	4.67	297	86.4	84.6	85	118	112.8	113.1
P54886	ALDH18A1	Delta-1-pyrroline-5-carboxylate synthase OS=Homo sapiens OX=9606 GN=ALDH18A1 PE=1 SV=2	40	25	37	25	795	87.2	7.12	850	107.2	103.6	105.8	94.8	94.8	93.9
Q8TCS8	PNPT1	Polyribonucleotide nucleotidyltransferase 1, mitochondrial OS=Homo sapiens OX=9606 GN=PNPT1 PE=1 SV=2	28	18	23	18	783	85.9	7.77	444	102.6	100.8	100.5	98.3	99.6	98.1
Q96HP4	OXNAD1	Oxidoreductase NAD-binding domain-containing protein 1 OS=Homo sapiens OX=9606 GN=OXNAD1 PE=1 SV=1	5	1	1	1	312	34.8	8.37	27	93.3	101.8	99.3	102.7	101.3	101.6
Q9UI12	ATP6V1H	V-type proton ATPase subunit H OS=Homo sapiens OX=9606 GN=ATP6V1H PE=1 SV=1	35	11	13	11	483	55.8	6.48	413	95.3	96.4	95.8	103.3	103.7	105.5
P35249	RFC4	Replication factor C subunit 4 OS=Homo sapiens OX=9606 GN=RFC4 PE=1 SV=2	58	14	17	14	363	39.7	8.02	347	104.2	103.1	108	92.5	95.4	96.8
Q9UBQ5	EIF3K	Eukaryotic translation initiation factor 3 subunit K OS=Homo sapiens OX=9606 GN=EIF3K PE=1 SV=1	50	8	24	8	218	25	4.93	779	104.6	102.5	105.9	96.6	97.4	93
P32004	L1CAM	Neural cell adhesion molecule L1 OS=Homo sapiens OX=9606 GN=L1CAM PE=1 SV=2	15	17	18	17	1257	139.9	6.24	315	94.1	88.7	98	116.7	98.9	103.6
Q86UU1	PHLDB1	Pleckstrin homology-like domain family B member 1 OS=Homo sapiens OX=9606 GN=PHLDB1 PE=1 SV=1	8	9	11	9	1377	151.1	8.63	200	98.9	97.6	93.8	103.1	101.4	105.2
P84077	ARF1	ADP-ribosylation factor 1 OS=Homo sapiens OX=9606 GN=ARF1 PE=1 SV=2	78	12	51	7	181	20.7	6.8	1488	93.5	92	95.2	104.4	108.9	105.9
Q9BY32	ITPA	Inosine triphosphate pyrophosphatase OS=Homo sapiens OX=9606 GN=ITPA PE=1 SV=2	62	8	10	8	194	21.4	5.66	223	102.8	103.9	98.9	98.7	100.2	95.6
Q5BKZ1	ZNF326	DBIRD complex subunit ZNF326 OS=Homo sapiens OX=9606 GN=ZNF326 PE=1 SV=2	12	6	6	6	582	65.6	5.15	102	103.2	106	104.5	98	94.6	93.7
P14621	ACYP2	Acylphosphatase-2 OS=Homo sapiens OX=9606 GN=ACYP2 PE=1 SV=2	20	2	2	2	99	11.1	9.5	0	95.5	101.5	96.3	101.1	104.6	101
Q9UPQ0	LIMCH1	LIM and calponin homology domains-containing protein 1 OS=Homo sapiens OX=9606 GN=LIMCH1 PE=1 SV=4	12	10	12	10	1083	121.8	6.47	216	96	99.1	106.2	106.7	89.3	102.8
Q9Y2U8	LEMD3	Inner nuclear membrane protein Man1 OS=Homo sapiens OX=9606 GN=LEMD3 PE=1 SV=2	20	11	12	11	911	99.9	7.55	381	101.6	100.3	100.1	97.4	99	101.6
Q99538	LGMN	Legumain OS=Homo sapiens OX=9606 GN=LGMN PE=1 SV=1	14	4	5	4	433	49.4	6.55	150	91.9	87.9	93.9	119.5	106.2	100.6
Q86UE4	MTDH	Protein LYRIC OS=Homo sapiens OX=9606 GN=MTDH PE=1 SV=2	46	23	35	23	582	63.8	9.32	1045	101.5	100.7	101.6	97.6	99.1	99.6
P08047	SP1	Transcription factor Sp1 OS=Homo sapiens OX=9606 GN=SP1 PE=1 SV=3	10	5	5	5	785	80.6	7.34	118	107.2	103.1	103	94.8	96.3	95.6
O15541	RNF113A	E3 ubiquitin-protein ligase RNF113A OS=Homo sapiens OX=9606 GN=RNF113A PE=1 SV=1	3	1	1	1	343	38.8	5.69	31	106.5	95.1	99.5	88.7	102	108.1
P62269	RPS18	40S ribosomal protein S18 OS=Homo sapiens OX=9606 GN=RPS18 PE=1 SV=3	51	11	23	11	152	17.7	10.99	249	100.5	99.4	100.3	98.5	99.3	102.1
Q9BYT8	NLN	Neurolysin, mitochondrial OS=Homo sapiens OX=9606 GN=NLN PE=1 SV=1	30	18	29	18	704	80.6	6.64	507	107.5	103.1	103.2	95	95.6	95.6
P49757	NUMB	Protein numb homolog OS=Homo sapiens OX=9606 GN=NUMB PE=1 SV=2	20	11	14	7	651	70.8	8.51	222	96	96.8	97.6	102.2	103.9	103.4
Q7LBR1	CHMP1B	Charged multivesicular body protein 1b OS=Homo sapiens OX=9606 GN=CHMP1B PE=1 SV=1	16	4	6	4	199	22.1	8.1	70	98.1	99.1	98.6	102.5	102.5	99.3
Q53GG5	PDLIM3	PDZ and LIM domain protein 3 OS=Homo sapiens OX=9606 GN=PDLIM3 PE=1 SV=1	7	2	2	2	364	39.2	6.89	18	95.4	99.8	104.5	96.5	99.5	104.3
Q9UK59	DBR1	Lariat debranching enzyme OS=Homo sapiens OX=9606 GN=DBR1 PE=1 SV=2	2	1	1	1	544	61.5	5.47	29	104.8	109	104.2	94.3	93.3	94.5
Q14145	KEAP1	Kelch-like ECH-associated protein 1 OS=Homo sapiens OX=9606 GN=KEAP1 PE=1 SV=2	5	2	2	2	624	69.6	6.44	23	91.3	92.4	94.4	113.4	92.7	115.9
Q9C002	NMES1	Normal mucosa of esophagus-specific gene 1 protein OS=Homo sapiens OX=9606 GN=NMES1 PE=2 SV=1	52	4	7	4	83	9.6	9.47	130	79.8	93.6	79.6	125.3	110.1	111.6
Q9P2G1	ANKIB1	Ankyrin repeat and IBR domain-containing protein 1 OS=Homo sapiens OX=9606 GN=ANKIB1 PE=1 SV=3	1	1	1	1	1089	121.9	5.11	43	95.9	83.1	93	128.5	97.1	102.4
P43155	CRAT	Carnitine O-acetyltransferase OS=Homo sapiens OX=9606 GN=CRAT PE=1 SV=5	12	7	7	7	626	70.8	8.44	117	93.3	92.4	86.8	114.7	109	103.9
Q4LDG9	DNAL1	Dynein light chain 1, axonemal OS=Homo sapiens OX=9606 GN=DNAL1 PE=1 SV=1	9	2	2	2	190	21.5	6.1	18	93.8	94.7	99	100.9	105	106.6
Q8N511	TMEM199	Transmembrane protein 199 OS=Homo sapiens OX=9606 GN=TMEM199 PE=1 SV=1	6	1	1	1	208	23.1	9.01	18	98.1	96.6	104.8	96.7	99.5	104.3
Q9BUA3	SPINDOC	Spindlin interactor and repressor of chromatin-binding protein OS=Homo sapiens OX=9606 GN=SPINDOC PE=1 SV=3	5	1	1	1	381	41	5.01	41	101.7	94.6	124.5	91.1	108.2	80
Q2KHT3	CLEC16A	Protein CLEC16A OS=Homo sapiens OX=9606 GN=CLEC16A PE=1 SV=2	3	2	2	2	1053	117.6	5.86	34	94.8	104	99	105.8	95.5	101
Q9Y4W6	AFG3L2	AFG3-like protein 2 OS=Homo sapiens OX=9606 GN=AFG3L2 PE=1 SV=2	43	30	44	29	797	88.5	8.66	837	103.2	100.2	101.1	99.3	98.7	97.7
Q8IWD4	CCDC117	Coiled-coil domain-containing protein 117 OS=Homo sapiens OX=9606 GN=CCDC117 PE=1 SV=1	3	1	1	1	279	30.5	5.07	0	95	89.6	97.4	104.7	103.2	110.2
Q8ND76	CCNY	Cyclin-Y OS=Homo sapiens OX=9606 GN=CCNY PE=1 SV=2	17	4	4	3	341	39.3	7.2	81	101.8	101.1	99.8	87.7	99.7	109.9
P16435	POR	NADPH--cytochrome P450 reductase OS=Homo sapiens OX=9606 GN=POR PE=1 SV=2	39	21	27	21	677	76.6	5.58	510	98.8	99.9	101	101.6	99.6	99.1
P49419	ALDH7A1	Alpha-aminoadipic semialdehyde dehydrogenase OS=Homo sapiens OX=9606 GN=ALDH7A1 PE=1 SV=5	50	23	43	23	539	58.5	7.99	1126	94.5	99.8	93.4	104	104.8	103.4
Q96L91	EP400	E1A-binding protein p400 OS=Homo sapiens OX=9606 GN=EP400 PE=1 SV=4	1	1	1	1	3159	343.3	9.19	62	103.1	101.5	106.1	100.7	89.6	99
P21291	CSRP1	Cysteine and glycine-rich protein 1 OS=Homo sapiens OX=9606 GN=CSRP1 PE=1 SV=3	68	11	34	11	193	20.6	8.57	712	90.9	93.9	92.4	108.9	107.6	106.3
Q7L9L4	MOB1B	MOB kinase activator 1B OS=Homo sapiens OX=9606 GN=MOB1B PE=1 SV=3	30	7	10	1	216	25.1	6.73	197
Q15532	SS18	Protein SSXT OS=Homo sapiens OX=9606 GN=SS18 PE=1 SV=3	9	3	3	3	418	45.9	6.46	51	102.5	101.5	102.6	97.2	96	100.2
Q92738	USP6NL	USP6 N-terminal-like protein OS=Homo sapiens OX=9606 GN=USP6NL PE=1 SV=3	2	1	1	1	828	94	9.07	37	91.4	105.2	101.7	100.9	98.1	102.7
Q9NZ32	ACTR10	Actin-related protein 10 OS=Homo sapiens OX=9606 GN=ACTR10 PE=1 SV=1	25	7	9	7	417	46.3	7.37	169	98.6	100.4	97.7	99.2	100.9	103.1
Q5EB52	MEST	Mesoderm-specific transcript homolog protein OS=Homo sapiens OX=9606 GN=MEST PE=2 SV=2	11	2	3	2	335	38.8	9.74	137	99.2	92.5	102	103	100.6	102.8
Q9ULL8	SHROOM4	Protein Shroom4 OS=Homo sapiens OX=9606 GN=SHROOM4 PE=1 SV=3	1	2	2	1	1493	164.8	6.65	21
P49411	TUFM	Elongation factor Tu, mitochondrial OS=Homo sapiens OX=9606 GN=TUFM PE=1 SV=2	64	26	68	26	452	49.5	7.61	1694	99.4	97.9	97.7	101.3	103.2	100.4
Q9Y487	ATP6V0A2	V-type proton ATPase 116 kDa subunit a isoform 2 OS=Homo sapiens OX=9606 GN=ATP6V0A2 PE=1 SV=2	6	3	3	3	856	98	6.61	111	98	99.2	98.3	101.1	94.2	109.2
P04233	CD74	HLA class II histocompatibility antigen gamma chain OS=Homo sapiens OX=9606 GN=CD74 PE=1 SV=3	19	5	6	5	296	33.5	8.44	135	99.9	124.4	98.3	95.9	90.2	91.2
Q9Y5L0	TNPO3	Transportin-3 OS=Homo sapiens OX=9606 GN=TNPO3 PE=1 SV=3	29	20	24	20	923	104.1	5.57	499	100.8	100.3	99.7	99.2	100.6	99.5
O95834	EML2	Echinoderm microtubule-associated protein-like 2 OS=Homo sapiens OX=9606 GN=EML2 PE=1 SV=1	25	13	17	13	649	70.6	6.32	320	97.6	97	95.2	105.4	102.8	102
Q15796	SMAD2	Mothers against decapentaplegic homolog 2 OS=Homo sapiens OX=9606 GN=SMAD2 PE=1 SV=1	12	5	10	1	467	52.3	6.58	66	103.8	101.6	103.8	96.9	94.2	99.7
Q9H788	SH2D4A	SH2 domain-containing protein 4A OS=Homo sapiens OX=9606 GN=SH2D4A PE=1 SV=1	3	1	1	1	454	52.7	8.06	50	100.9	94.4	104.4	103.8	96.1	100.4
P00367	GLUD1	Glutamate dehydrogenase 1, mitochondrial OS=Homo sapiens OX=9606 GN=GLUD1 PE=1 SV=2	49	25	48	25	558	61.4	7.8	903	105.1	103.4	102.3	97.5	95.6	96.1
Q9Y2R5	MRPS17	28S ribosomal protein S17, mitochondrial OS=Homo sapiens OX=9606 GN=MRPS17 PE=1 SV=1	38	5	7	5	130	14.5	9.85	105	101.1	97.3	100.4	103.4	99.5	98.3
Q9ULC4	MCTS1	Malignant T-cell-amplified sequence 1 OS=Homo sapiens OX=9606 GN=MCTS1 PE=1 SV=1	69	10	15	10	181	20.5	8.82	370	95.9	100.9	97	101.1	103.1	102
Q9NTJ3	SMC4	Structural maintenance of chromosomes protein 4 OS=Homo sapiens OX=9606 GN=SMC4 PE=1 SV=2	33	38	50	38	1288	147.1	6.79	877	100.9	100.2	101.4	98	99.9	99.5
Q9UGL9	CRCT1	Cysteine-rich C-terminal protein 1 OS=Homo sapiens OX=9606 GN=CRCT1 PE=1 SV=1	10	1	1	1	99	9.7	8.66	0
Q6ZSR9		Uncharacterized protein FLJ45252 OS=Homo sapiens OX=9606 PE=2 SV=2	32	6	7	6	355	38	5.26	197	98.6	97.7	98.2	100.9	99.5	105.1
P24821	TNC	Tenascin OS=Homo sapiens OX=9606 GN=TNC PE=1 SV=3	6	9	9	9	2201	240.7	4.89	153	119.2	107.3	103.9	89.9	88.1	91.6
Q9NP66	HMG20A	High mobility group protein 20A OS=Homo sapiens OX=9606 GN=HMG20A PE=1 SV=1	11	3	3	3	347	40.1	6.49	43	98.5	103.5	103.7	97	99.7	97.7
Q8WXF1	PSPC1	Paraspeckle component 1 OS=Homo sapiens OX=9606 GN=PSPC1 PE=1 SV=1	26	14	20	13	523	58.7	6.67	472	105.5	106.1	106.3	93.3	94.9	93.8
Q9NRN9	METTL5	Methyltransferase-like protein 5 OS=Homo sapiens OX=9606 GN=METTL5 PE=1 SV=1	27	4	4	4	209	23.7	6.68	141	104.9	100.2	107.2	94.2	98.5	95
Q68D91	MBLAC2	Metallo-beta-lactamase domain-containing protein 2 OS=Homo sapiens OX=9606 GN=MBLAC2 PE=1 SV=3	17	5	5	5	279	31.4	6.92	42	104.4	102.7	106.3	94.1	96.4	96.1
P10768	ESD	S-formylglutathione hydrolase OS=Homo sapiens OX=9606 GN=ESD PE=1 SV=2	63	13	35	13	282	31.4	7.02	756	101.8	103.2	96.3	100.3	99.7	98.7
A0A087WTH5	KCNE1B	Potassium voltage-gated channel subfamily E member 1B OS=Homo sapiens OX=9606 GN=KCNE1B PE=3 SV=2	14	1	1	1	132	15	8.68	0	119.2	127.7	50.5	148.1	105.7	48.9
Q6ZUT1	NKAPD1	Uncharacterized protein NKAPD1 OS=Homo sapiens OX=9606 GN=NKAPD1 PE=1 SV=2	4	1	1	1	292	34.1	9.73	47	117.1	103.7	104.7	84.4	92.5	97.6
P01024	C3	Complement C3 OS=Homo sapiens OX=9606 GN=C3 PE=1 SV=2	24	30	33	29	1663	187	6.4	641	91	100.6	91.3	107.1	107	103
P19174	PLCG1	1-phosphatidylinositol 4,5-bisphosphate phosphodiesterase gamma-1 OS=Homo sapiens OX=9606 GN=PLCG1 PE=1 SV=1	17	16	21	16	1290	148.4	6.05	480	100.6	100.6	100.8	98.1	99.6	100.3
Q8WU76	SCFD2	Sec1 family domain-containing protein 2 OS=Homo sapiens OX=9606 GN=SCFD2 PE=1 SV=2	3	2	3	2	684	75.1	6.68	56	104.9	104.9	105.8	94	94.6	95.8
Q9NW82	WDR70	WD repeat-containing protein 70 OS=Homo sapiens OX=9606 GN=WDR70 PE=1 SV=1	14	8	9	8	654	73.2	6.33	135	105.2	99	107	96.9	93.9	98
Q9BZJ0	CRNKL1	Crooked neck-like protein 1 OS=Homo sapiens OX=9606 GN=CRNKL1 PE=1 SV=4	20	15	22	15	848	100.4	8	309	107	98.4	108.2	95.1	94.5	96.8
Q99418	CYTH2	Cytohesin-2 OS=Homo sapiens OX=9606 GN=CYTH2 PE=1 SV=2	6	1	1	1	400	46.5	5.54	31	81.9	71.3	76.2	93.4	89.6	187.5
P11413	G6PD	Glucose-6-phosphate 1-dehydrogenase OS=Homo sapiens OX=9606 GN=G6PD PE=1 SV=4	62	28	49	28	515	59.2	6.84	922	103.5	115.9	102.1	92.5	94.2	91.8
P37235	HPCAL1	Hippocalcin-like protein 1 OS=Homo sapiens OX=9606 GN=HPCAL1 PE=1 SV=3	73	14	25	14	193	22.3	5.35	409	106.1	119.2	104.9	91.8	90	88
Q9BZL1	UBL5	Ubiquitin-like protein 5 OS=Homo sapiens OX=9606 GN=UBL5 PE=1 SV=1	25	2	2	2	73	8.5	8.44	40	95.6	94.3	103.9	103	100.2	103
P04259	KRT6B	Keratin, type II cytoskeletal 6B OS=Homo sapiens OX=9606 GN=KRT6B PE=1 SV=5	23	14	33	3	564	60	8	402	136.2	227.1	43.1	53.9	46.4	93.3
O00505	KPNA3	Importin subunit alpha-4 OS=Homo sapiens OX=9606 GN=KPNA3 PE=1 SV=2	50	17	30	12	521	57.8	4.94	802	102.3	103.7	103.2	99.4	96.2	95.2
P49755	TMED10	Transmembrane emp24 domain-containing protein 10 OS=Homo sapiens OX=9606 GN=TMED10 PE=1 SV=2	45	10	24	10	219	25	7.44	577	95.7	98.2	94.1	104.9	104.7	102.3
Q13608	PEX6	Peroxisome assembly factor 2 OS=Homo sapiens OX=9606 GN=PEX6 PE=1 SV=2	2	1	1	1	980	104	6.34	31	103.9	103.6	103.9	97.8	86.5	104.3
P22670	RFX1	MHC class II regulatory factor RFX1 OS=Homo sapiens OX=9606 GN=RFX1 PE=1 SV=2	10	7	8	7	979	104.7	6.29	161	103.1	102.4	100.8	94.9	95.6	103.2
P62341	SELENOT	Thioredoxin reductase-like selenoprotein T OS=Homo sapiens OX=9606 GN=SELENOT PE=1 SV=2	7	1	1	1	195	22.3	8.6	37	96.1	87.7	88.7	110.2	106.4	110.8
P40855	PEX19	Peroxisomal biogenesis factor 19 OS=Homo sapiens OX=9606 GN=PEX19 PE=1 SV=1	27	5	7	5	299	32.8	4.34	203	93.5	94.4	98.6	109.1	102.7	101.6
P02458	COL2A1	Collagen alpha-1(II) chain OS=Homo sapiens OX=9606 GN=COL2A1 PE=1 SV=3	1	1	1	1	1487	141.7	6.92	20	96.2	98.4	100.6	102.2	99	103.6
Q96D46	NMD3	60S ribosomal export protein NMD3 OS=Homo sapiens OX=9606 GN=NMD3 PE=1 SV=1	33	17	22	17	503	57.6	7.14	371	102.3	100.1	105.5	96	96.7	99.4
O60476	MAN1A2	Mannosyl-oligosaccharide 1,2-alpha-mannosidase IB OS=Homo sapiens OX=9606 GN=MAN1A2 PE=1 SV=1	2	1	1	1	641	73	7.61	0	93.9	91.6	93.4	111.9	102.3	106.8
Q96AG4	LRRC59	Leucine-rich repeat-containing protein 59 OS=Homo sapiens OX=9606 GN=LRRC59 PE=1 SV=1	60	18	42	18	307	34.9	9.57	1000	98.6	98.6	101.1	99.7	102.5	99.4
P53582	METAP1	Methionine aminopeptidase 1 OS=Homo sapiens OX=9606 GN=METAP1 PE=1 SV=2	30	8	9	8	386	43.2	7.17	158	101.9	106.1	110.5	89.4	97.2	94.9
O75127	PTCD1	Pentatricopeptide repeat-containing protein 1, mitochondrial OS=Homo sapiens OX=9606 GN=PTCD1 PE=1 SV=2	2	1	1	1	700	78.8	8.59	0	100.2	100.2	100.8	100.1	100.3	98.3
P29400	COL4A5	Collagen alpha-5(IV) chain OS=Homo sapiens OX=9606 GN=COL4A5 PE=1 SV=2	1	1	1	1	1685	160.9	7.62	18	100.4	100.2	98.3	99.4	102.5	99.2
Q658Y4	FAM91A1	Protein FAM91A1 OS=Homo sapiens OX=9606 GN=FAM91A1 PE=1 SV=3	20	15	17	15	838	93.9	6.39	185	99.2	94.4	96.7	102.4	103.2	104.1
Q9Y4B6	DCAF1	DDB1- and CUL4-associated factor 1 OS=Homo sapiens OX=9606 GN=DCAF1 PE=1 SV=3	4	5	5	5	1507	168.9	5.06	62	99.7	99.8	104.9	100.4	93	102.1
Q9P031	CCDC59	Thyroid transcription factor 1-associated protein 26 OS=Homo sapiens OX=9606 GN=CCDC59 PE=1 SV=2	9	2	2	2	241	28.7	9.88	62	101.7	94.8	108.9	103.7	93.6	97.2
Q12904	AIMP1	Aminoacyl tRNA synthase complex-interacting multifunctional protein 1 OS=Homo sapiens OX=9606 GN=AIMP1 PE=1 SV=2	64	18	22	17	312	34.3	8.43	362	96.8	96.8	98.1	100.7	102.7	104.9
Q5SWX8	ODR4	Protein odr-4 homolog OS=Homo sapiens OX=9606 GN=ODR4 PE=1 SV=1	23	9	10	9	454	51.1	5.92	160	96.6	93.5	94.7	106.1	104.2	104.9
P42898	MTHFR	Methylenetetrahydrofolate reductase OS=Homo sapiens OX=9606 GN=MTHFR PE=1 SV=3	4	2	2	2	656	74.5	5.34	0	99.3	107.7	98.9	95.3	98.3	100.4
Q12955	ANK3	Ankyrin-3 OS=Homo sapiens OX=9606 GN=ANK3 PE=1 SV=3	0	1	1	1	4377	480.1	6.49	0	100.6	93.5	93.8	101.2	96.4	114.5
Q9H019	MTFR1L	Mitochondrial fission regulator 1-like OS=Homo sapiens OX=9606 GN=MTFR1L PE=1 SV=2	6	1	1	1	292	31.9	6.1	18	95.5	95.6	94.3	110.7	96	107.9
Q96QG7	MTMR9	Myotubularin-related protein 9 OS=Homo sapiens OX=9606 GN=MTMR9 PE=1 SV=1	9	4	5	4	549	63.4	6.39	64	97.6	96.1	93.6	105.7	102.3	104.6
Q92623	TTC9	Tetratricopeptide repeat protein 9A OS=Homo sapiens OX=9606 GN=TTC9 PE=1 SV=3	5	1	1	1	222	24.4	8.98	0
Q30201	HFE	Hereditary hemochromatosis protein OS=Homo sapiens OX=9606 GN=HFE PE=1 SV=1	9	2	2	2	348	40.1	6.6	24	100.2	96.9	96.1	100.1	97.6	109.2
Q99471	PFDN5	Prefoldin subunit 5 OS=Homo sapiens OX=9606 GN=PFDN5 PE=1 SV=2	83	10	28	10	154	17.3	6.33	751	99.9	105	100.3	98.3	98.4	98
Q9Y266	NUDC	Nuclear migration protein nudC OS=Homo sapiens OX=9606 GN=NUDC PE=1 SV=1	64	24	58	24	331	38.2	5.38	998	100.1	94.9	102.5	99.3	102.7	100.5
Q9UBQ7	GRHPR	Glyoxylate reductase/hydroxypyruvate reductase OS=Homo sapiens OX=9606 GN=GRHPR PE=1 SV=1	40	10	14	10	328	35.6	7.39	423	96.7	101.9	96	103.5	101.8	100.2
Q14691	GINS1	DNA replication complex GINS protein PSF1 OS=Homo sapiens OX=9606 GN=GINS1 PE=1 SV=1	15	2	2	2	196	23	7.39	40	115.2	99	100.5	95.1	87.3	102.9
P42285	MTREX	Exosome RNA helicase MTR4 OS=Homo sapiens OX=9606 GN=MTREX PE=1 SV=3	29	26	33	26	1042	117.7	6.52	506	108.1	105.2	107.7	93.2	92.7	93.1
Q92766	RREB1	Ras-responsive element-binding protein 1 OS=Homo sapiens OX=9606 GN=RREB1 PE=1 SV=3	1	1	1	1	1687	181.3	6.98	21	114.4	112.4	115.8	86.5	82.6	88.4
P63218	GNG5	Guanine nucleotide-binding protein G(I)/G(S)/G(O) subunit gamma-5 OS=Homo sapiens OX=9606 GN=GNG5 PE=1 SV=3	24	2	4	2	68	7.3	9.85	79	83	98.1	85.2	114.7	107.7	111.3
Q7Z7M9	GALNT5	Polypeptide N-acetylgalactosaminyltransferase 5 OS=Homo sapiens OX=9606 GN=GALNT5 PE=1 SV=1	1	1	1	1	940	106.2	9.47	0	94.9	91.3	92.6	114.2	101.2	105.8
O95425	SVIL	Supervillin OS=Homo sapiens OX=9606 GN=SVIL PE=1 SV=2	19	31	35	31	2214	247.6	6.98	683	100.1	101.2	100.6	100.8	98.1	99.3
Q99933	BAG1	BAG family molecular chaperone regulator 1 OS=Homo sapiens OX=9606 GN=BAG1 PE=1 SV=4	3	1	2	1	345	38.8	7.81	54	119.1	95.8	125.3	85.4	85.6	88.9
Q9BXV9	GON7	EKC/KEOPS complex subunit GON7 OS=Homo sapiens OX=9606 GN=GON7 PE=1 SV=2	57	3	3	3	100	10.9	4.27	95	103.3	92.9	91.6	103.1	98.9	110.2
Q9Y2X7	GIT1	ARF GTPase-activating protein GIT1 OS=Homo sapiens OX=9606 GN=GIT1 PE=1 SV=2	15	10	10	9	761	84.3	6.8	91	97.2	99.2	96.3	101.2	102.2	103.8
P29279	CCN2	CCN family member 2 OS=Homo sapiens OX=9606 GN=CCN2 PE=1 SV=2	9	3	3	3	349	38.1	8	39	107.3	100.3	102.4	97.7	92.3	100.1
Q9NYP9	MIS18A	Protein Mis18-alpha OS=Homo sapiens OX=9606 GN=MIS18A PE=1 SV=1	4	1	1	1	233	25.8	5.2	60	96.3	85	106.3	112.9	96.9	102.7
P30307	CDC25C	M-phase inducer phosphatase 3 OS=Homo sapiens OX=9606 GN=CDC25C PE=1 SV=2	3	1	1	1	473	53.3	6.79	29
[truncated: 4,701 more rows]
